# Supplementary material for: Catalytic enantioselective synthesis of chiral spirocyclic 1,3-diketonesviaorgano-cation catalysis
Source: Royal Society of Chemistry journal article supplement (doi:10.1039/d1cc05205e), 2021-01-01
Supplement: d1cc05205e1.pdf [file d1cc05205e1.pdf]

## **Catalytic Enantioselective Synthesis of Chiral Spirocyclic 1,3-Diketones via Organo-Cation Catalysis**

Xiao-Yan Zhang,<sup>a</sup> Ya-Ping Shao,<sup>a</sup> Bao-Kuan Guo,<sup>a</sup> Kun Zhang,<sup>b</sup> Fu-Min Zhang,<sup>a</sup> Xiao-Ming Zhang,<sup>\*a</sup> and Yong-Qiang Tu<sup>\*a</sup>

<sup>a</sup>State Key Laboratory of Applied Organic Chemistry, School of Chemistry and Chemical Engineering, Lanzhou University, Lanzhou 730000, P. R. China

<sup>b</sup>School of Biotechnology and Health Sciences, Wuyi University, Jiangmen, Guangdong, 529020, P. R. China

\*E-mail: tuyq@lzu.edu.cn, zhangxiaom@lzu.edu.cn

## Table of Contents

|                                                                 |    |
|-----------------------------------------------------------------|----|
| 1. GENERAL INFORMATION .....                                    | 3  |
| 2. SYNTHESIS OF CHIRAL SPA-TRIAZOLIUM BROMIDE CATALYSTS .....   | 4  |
| 3. GENERAL PROCEDURE FOR THE PREPARATION OF ENOL LACTONES ..... | 7  |
| 4. OPTIMIZATION OF REACTION CONDITIONS .....                    | 9  |
| 5. GENERAL PROCEDURE .....                                      | 10 |
| 6. CHARACTERIZATION DATA .....                                  | 11 |
| 7. X-RAY CRYSTALLOGRAPHIC INFORMATION .....                     | 18 |
| 8. NMR SPECTROSCOPIC DATA AND UPC <sup>2</sup> DATA.....        | 19 |
| 9. REFERENCES .....                                             | 96 |

## 1. General information

In addition to commercially available extra dry solvents, all solvents were purified by standard operating method. Toluene, tetrahydrofuran (THF), diethyl ether (Et<sub>2</sub>O) and methyl tert-butyl ether (MTBE) were distilled from sodium; Dichloromethane (DCM) and 1,2-dichloroethane (DCE) were distilled from calcium hydride; Acetonitrile was distilled from phosphorus pentoxide; *N,N*-dimethylformamide (DMF) was distilled from K<sub>2</sub>CO<sub>3</sub> under reduced pressure. All reactions under standard conditions were monitored by thin-layer chromatography (TLC) on gel F254 plates. Silica gel (200-300 mesh), petroleum ether (b.p. 60-90 °C), ethyl acetate were used for product purification by flash column chromatography. <sup>1</sup>H NMR spectra were acquired on a Bruker 400 or 600 MHz; <sup>13</sup>C NMR spectra were acquired at 101 or 151 MHz and <sup>19</sup>F NMR spectra were acquired at 376 MHz. Chemical shifts (δ) were reported in ppm relative to residual solvent signals (CDCl<sub>3</sub>: 7.26 ppm for <sup>1</sup>H NMR; 77.0 ppm for <sup>13</sup>C NMR.) The following abbreviations are used to indicate the multiplicity in NMR spectra: s, singlet; d, doublet; t, triplet; q, quartet; dd, double of doublets; td, triplet of doublets; m, multiplet. High-resolution mass spectral analysis (HRMS) data were determined on an APEXII 47e FT-ICR spectrometer by means of the ESI technique. IR spectra were recorded on a fourier transform infrared spectrometer. Enantioselectivities were recorded on Waters UPC<sup>2</sup>. Optical rotations were detected on RUDOLPH A21202-J APTV/GW. Melting points were recorded on a melting point apparatus and uncorrected. X-ray diffraction data were collected on Agilent SuperNova Eos diffractometer.

## 2. Synthesis of chiral SPA-triazolium bromide catalysts

### General procedure for the preparation of catalysts

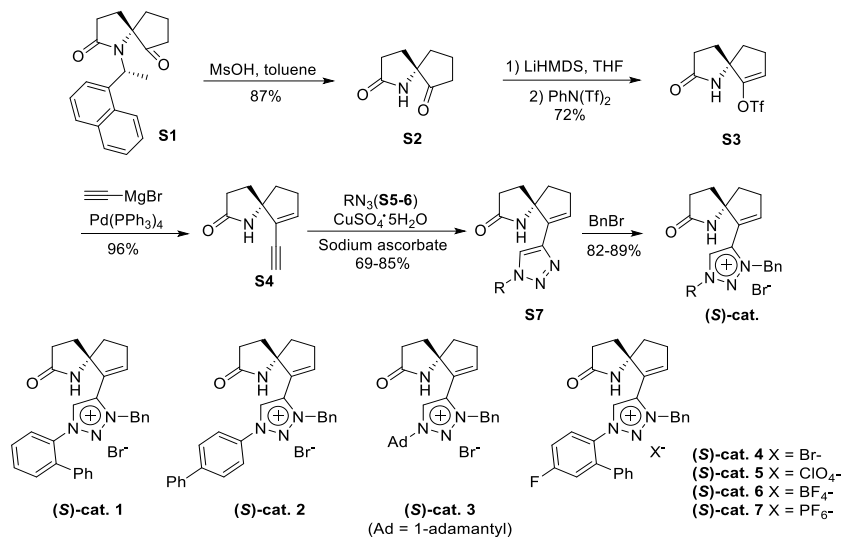

(S)-cat. 1 and (S)-3 were prepared according to our previous work.<sup>1</sup>

### Preparation of chiral alkyne

Compound S1- S4 were prepared according to our previous work.<sup>1</sup>

### Preparation of azides

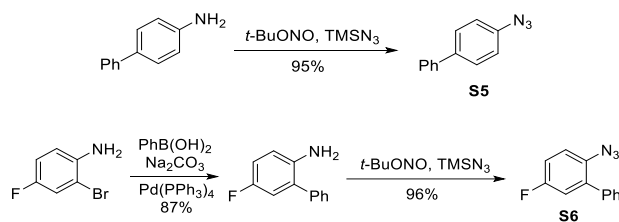

Azides S5 and S6 were prepared following the procedure of literature.<sup>2</sup>

### Synthesis of triazoles

#### (S)-6-(1-([1,1'-biphenyl]-4-yl)-1H-1,2,3-triazol-4-yl)-1-azaspiro[4.4]non-6-en-2-one

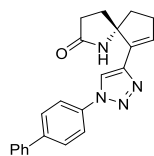

To a stirred solution of alkyne (3.0 mmol, 1.0 equiv) and 4-azido-1,1-biphenyl (3.6 mmol, 1.2 equiv) in a mixed solvent of water (14 mL) and EtOH (14 mL) was added CuSO<sub>4</sub>·5H<sub>2</sub>O (0.3 mmol, 0.1 equiv) and sodium ascorbate (0.9 mmol, 0.3 equiv) under argon atmosphere. The resulting mixture was refluxed at 90 °C until consumption of substrate. The reaction mixture was cooled to room temperature, filtered through celite and concentrated under vacuum. The crude residue was purified by flash silica gel chromatography.<sup>1</sup>

**(S)-6-(1-(5-fluoro-[1,1'-biphenyl]-2-yl)-1H-1,2,3-triazol-4-yl)-1-azaspiro[4.4]non-6-en-2-one**

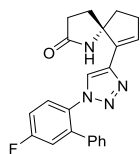

To a stirred solution of alkyne (3.0 mmol, 1.0 equiv) and 4-azido-5-fluoro-1,1-biphenyl (3.6 mmol, 1.2 equiv) in a mixed solvent of water (14 mL) and EtOH (14 mL) was added  $\text{CuSO}_4 \cdot 5\text{H}_2\text{O}$  (0.3 mmol, 0.1 equiv) and sodium ascorbate (0.9 mmol, 0.3 equiv) under argon atmosphere. The resulting mixture was refluxed at 90 °C until consumption of substrate. The reaction mixture was cooled to room temperature, filtered through celite and concentrated under vacuum. The crude residue was purified by flash silica gel chromatography.<sup>1</sup>

**Synthesis of triazoliums catalyst<sup>1</sup>**

**(S)-6-(1-([1,1'-biphenyl]-4-yl)-3-benzyl-1H-1,2,3,4-triazol-4-yl)-1-azaspiro[4.4]non-6-en-2-one**

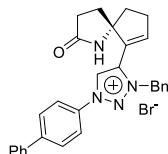

Brown solid (433 mg, 82% yield, m.p. = 139-141 °C).

To  $\text{CH}_3\text{CN}$  (8 mL) and  $\text{BnBr}$  (4 mL) in a 100 mL sealed tube was added corresponding triazoles (1.0 mmol) and then the sealed tube was filled with argon. The reaction mixture was stirred at 90 °C for about 3 days. The mixture was cooled to room temperature and concentrated under vacuum and the crude residue was purified by column chromatography to give **(S)-cat. 2**.

$[\alpha]_D^{21} = 108$  (c = 1.0,  $\text{CHCl}_3$ ).

**<sup>1</sup>H NMR** (400 MHz,  $\text{CDCl}_3$ )  $\delta$  10.09 (s, 1H), 8.25 (s, 1H), 8.17 (d,  $J = 8.4$  Hz, 2H), 7.71 (d,  $J = 8.3$  Hz, 2H), 7.53 (d,  $J = 7.0$  Hz, 2H), 7.46-7.31 (m, 8H), 6.61-6.59 (m, 1H), 6.21 (d,  $J = 15.3$  Hz, 1H), 5.99 (d,  $J = 15.4$  Hz, 1H), 2.65-2.58 (m, 1H), 2.51-2.42 (m, 1H), 2.17-2.10 (m, 4H), 1.89-1.80 (m, 2H). **<sup>13</sup>C NMR** (101 MHz,  $\text{CDCl}_3$ )  $\delta$  177.1, 144.2, 138.4, 138.1, 133.5, 132.0, 129.2, 129.1, 128.9, 128.5, 128.3, 128.1, 127.3, 126.9, 121.7, 72.6, 56.0, 38.4, 31.4, 30.4, 30.0. **HRMS** (ESI)  $m/z$  calculated for  $\text{C}_{29}\text{H}_{27}\text{N}_4\text{O}$   $[\text{M}-\text{Br}]^+$  447.2179, found 447.2183.

**(S)-6-(3-benzyl-1-(5-fluoro-[1,1'-biphenyl]-2-yl)-1H-1,2,3,4-triazol-4-yl)-1-azaspiro[4.4]non-6-en-2-one**

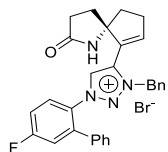

Brown solid (396 mg, 85% yield, m.p. = 193-194 °C).

To  $\text{CH}_3\text{CN}$  (8 mL) and  $\text{BnBr}$  (4 mL) in a 100 mL sealed tube was added corresponding triazoles (1.0 mmol) and then the sealed tube was filled with argon. The reaction mixture was stirred at 90 °C for about 3 days. The mixture was cooled to room temperature and concentrated under vacuum and the crude residue was purified by column chromatography to give **(S)-cat. 4**.

$[\alpha]_D^{22} = 71$  (c = 1.0,  $\text{CHCl}_3$ ).

**<sup>1</sup>H NMR** (600 MHz,  $\text{CDCl}_3$ )  $\delta$  9.23 (s, 1H), 8.10-8.08 (m, 1H), 7.85 (s, 1H), 7.39-7.15 (m, 10H), 6.89 (d,  $J = 7.5$  Hz, 2H), 6.62 (s, 1H), 6.04 (d,  $J = 15.3$  Hz, 1H), 5.78 (d,  $J = 15.3$  Hz, 1H), 2.64-2.59 (m, 1H), 2.47-2.41 (m, 1H), 2.13-2.07 (m, 3H), 1.92-1.88 (m, 1H), 1.71-1.67 (m, 1H), 1.39-1.33 (m, 1H). **<sup>13</sup>C NMR** (151 MHz,  $\text{CDCl}_3$ )  $\delta$  176.5, 164.6, 162.9, 144.3, 140.9 (d,  $J = 9.06$  Hz), 137.1, 134.9, 131.8, 131.4, 129.8 (d,  $J = 10.75$  Hz), 129.1, 129.1, 129.0, 128.8 (d,  $J = 3.02$  Hz), 128.7,

128.1, 128.0, 127.7, 118.0 (d,  $J = 24.16$  Hz), 116.1 (d,  $J = 22.65$  Hz), 72.3, 55.9, 38.4, 31.3, 30.2 (d,  $J = 78.52$  Hz).  $^{19}\text{F}$  NMR (376 MHz,  $\text{CDCl}_3$ )  $\delta$  -106.1. HRMS (ESI)  $m/z$  calculated for  $\text{C}_{29}\text{H}_{26}\text{FN}_4\text{O}$   $[\text{M}-\text{Br}]^+$  465.2085, found 465.2090.

**(S)-6-(3-benzyl-1-(5-fluoro-[1,1'-biphenyl]-2-yl)-1H-1,2,3,4-triazol-4-yl)-1-azaspiro[4.4]non-6-en-2-one**

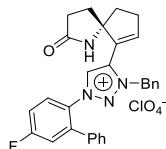

Yellow solid (2684 mg, 95% yield, m.p. = 111-113 °C).

(S)-cat. 4 (5 mmol, 1.0 equiv) was dissolved in DCM (10 mL) and  $\text{AgClO}_4$  (7.5 mmol, 1.5 equiv) was added. The mixture was stirred at room temperature until yellow precipitate was observed. Then filtration would give yellow solid (S)-cat. 5.

**(S)-6-(3-benzyl-1-(5-fluoro-[1,1'-biphenyl]-2-yl)-1H-1,2,3,4-triazol-4-yl)-1-azaspiro[4.4]non-6-en-2-one**

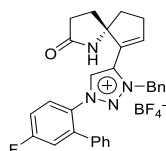

White solid (2486 mg, 90% yield, m.p. = 189-191 °C).

(S)-cat. 6 was synthesized from (S)-cat. 4 and  $\text{AgBF}_4$  following the similar procedure of (S)-cat. 5.

**(S)-6-(3-benzyl-1-(5-fluoro-[1,1'-biphenyl]-2-yl)-1H-1,2,3,4-triazol-4-yl)-1-azaspiro[4.4]non-6-en-2-one**

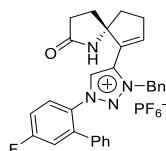

Brown solid (2839 mg, 93% yield, m.p. = 125-126 °C).

(S)-cat. 7 was synthesized from (S)-cat. 4 and  $\text{AgPF}_6$  following the similar procedure of (S)-cat. 5.

### 3. General procedure for the preparation of enol lactones

Preparation of substrates **1a-1p**.

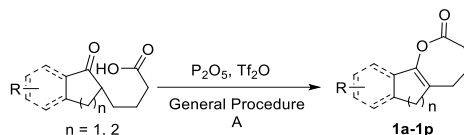

The requisite carboxylic acid derivatives were prepared following the procedure of literature.<sup>2b, 3</sup>

**General Procedures A:** To a solution of carboxylic acid derivatives (2 mmol, 1.0 equiv) in DCM (20 mL) was added  $\text{P}_2\text{O}_5$  (36 mmol, 18.0 equiv) and  $\text{Tf}_2\text{O}$  (2 mmol, 1.0 equiv) at 0 °C. When the product was observed, the reaction was quenched immediately with saturated  $\text{NaHCO}_3$  (20 mL) and extracted with DCM (20 mL  $\times$  3). The combined organic layer was dried over anhydrous  $\text{Na}_2\text{SO}_4$ , filtered and evaporated under reduced pressure. The resulting crude product was purified by flash silica gel chromatography.

#### 8-chloro-3,4,5,6-tetrahydro-2H-indeno[1,2-b]oxepin-2-one (**1a**)

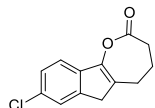

white solid (239 mg, 51% yield, m.p. = 136-137 °C).

**<sup>1</sup>H NMR** (400 MHz,  $\text{CDCl}_3$ )  $\delta$  7.32 -7.30 (m, 2H), 7.28-7.26 (m, 1H), 3.33 (s, 2H), 2.82-2.79 (m, 2H), 2.66 (t,  $J$  = 7.0 Hz, 2H), 2.16-2.10 (m, 2H). **<sup>13</sup>C NMR** (101 MHz,  $\text{CDCl}_3$ )  $\delta$  171.5, 144.8, 141.6, 138.8, 131.7, 127.1, 124.1, 122.9, 119.0, 39.4, 34.9, 28.8, 20.6. **HRMS** (ESI)  $m/z$  calculated for  $\text{C}_{13}\text{H}_{11}\text{ClO}_2\text{H}$  [ $\text{M}+\text{H}$ ]<sup>+</sup> 235.0520, found 235.0522.

#### 8-(naphthalen-2-yl)-3,4,5,6-tetrahydro-2H-indeno[1,2-b]oxepin-2-one (**1i**)

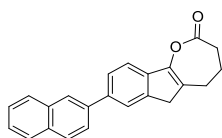

white solid (293 mg, 45% yield, m.p. = 71-73 °C).

**<sup>1</sup>H NMR** (400 MHz,  $\text{CDCl}_3$ )  $\delta$  8.05 (s, 1H), 7.92-7.85 (m, 3H), 7.77-7.68 (m, 3H), 7.54-7.45 (m, 3H), 3.46 (s, 2H), 2.86-2.83 (m, 2H), 2.73-2.70 (m, 2H), 2.20-2.14 (m, 2H). **<sup>13</sup>C NMR** (101 MHz,  $\text{CDCl}_3$ )  $\delta$  171.6, 145.1, 140.4, 139.2, 138.7, 138.5, 133.7, 132.5, 128.3, 128.1, 127.6, 126.2, 126.0, 125.8, 125.6, 122.8, 122.5, 118.2, 39.5, 34.6, 28.5, 20.6. **HRMS** (ESI)  $m/z$  calculated for  $\text{C}_{23}\text{H}_{18}\text{O}_2\text{H}$  [ $\text{M}+\text{H}$ ]<sup>+</sup> 327.1380, found 327.1379.

#### 3,4,5,6,7,8-hexahydro-2H-cyclopenta[b]oxepin-2-one (**1p**)

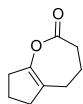

colourless oil (113 mg, 37% yield).

**<sup>1</sup>H NMR** (400 MHz,  $\text{CDCl}_3$ )  $\delta$  2.66-2.63 (m, 2H), 2.50-2.45 (m, 2H), 2.35-2.32 (m, 2H), 2.16-2.11 (m, 2H), 1.96-1.90 (m, 2H), 1.86-1.79 (m, 2H). **<sup>13</sup>C NMR** (101 MHz,  $\text{CDCl}_3$ )  $\delta$  172.2, 144.9, 117.0, 35.3, 34.5, 33.6, 28.3, 20.4, 19.0. **HRMS** (ESI)  $m/z$  calculated for  $\text{C}_9\text{H}_{12}\text{O}_2\text{H}$  [ $\text{M}+\text{H}$ ]<sup>+</sup> 153.0910, found 153.0911.

### Preparation of substrates **1q-1t**.

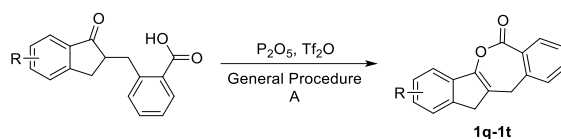

The requisite carboxylic acid derivatives were prepared following the procedure of literature.<sup>4</sup>

**General Procedures A:** To a solution of carboxylic acid derivatives (2 mmol, 1.0 equiv) in DCM (20 mL) was added P<sub>2</sub>O<sub>5</sub> (36 mmol, 18.0 equiv) and Tf<sub>2</sub>O (2 mmol, 1.0 equiv) at 0 °C. When the product was observed, the reaction was quenched immediately with saturated NaHCO<sub>3</sub> (20 mL) and extracted with DCM (20 mL × 3). The combined organic layer was dried over anhydrous Na<sub>2</sub>SO<sub>4</sub>, filtered and evaporated under reduced pressure. The resulting crude product was purified by flash silica gel chromatography.

### **2-chloro-11,12-dihydro-6H-benzo[e]indeno[1,2-b]oxepin-6-one (1q)**

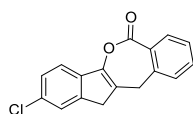

white solid (237 mg, 42% yield, m.p. = 118-119 °C).

**<sup>1</sup>H NMR** (400 MHz, CDCl<sub>3</sub>) δ 7.91 (d, *J* = 7.6 Hz, 1H), 7.48-7.45 (m, 1H), 7.36-7.32 (m, 3H), 7.28-7.26 (m, 1H), 7.18 (d, *J* = 7.6 Hz, 1H), 3.75 (s, 2H), 3.43 (s, 2H). **<sup>13</sup>C NMR** (101 MHz, CDCl<sub>3</sub>) δ 166.3, 146.7, 142.0, 141.5, 137.1, 133.7, 133.2, 131.5, 129.7, 127.4, 127.2, 127.0, 125.2, 124.4, 118.5, 37.2, 32.1. **HRMS** (ESI) *m/z* calculated for C<sub>17</sub>H<sub>11</sub>ClO<sub>2</sub>H [M+H]<sup>+</sup> 283.0520, found 283.0521.



## 4. Optimization of reaction conditions

Table S1. Screening of conditions<sup>a</sup>

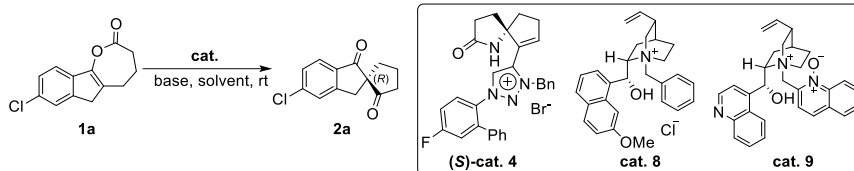

| entry           | catalyst   | base (equiv.)                         | solvent                     | yield (%) <sup>b</sup> | ee (%) <sup>c</sup> |
|-----------------|------------|---------------------------------------|-----------------------------|------------------------|---------------------|
| 1               | cat. 8     | Cs <sub>2</sub> CO <sub>3</sub> (0.2) | DCM                         | 61                     | 60                  |
| 2               | cat. 9     | Cs <sub>2</sub> CO <sub>3</sub> (0.2) | DCM                         | 58                     | 54                  |
| 3               | (S)-cat. 4 | Cs <sub>2</sub> CO <sub>3</sub> (0.2) | DCM                         | 80                     | 87                  |
| 4               | (S)-cat. 4 | Cs <sub>2</sub> CO <sub>3</sub> (0.2) | CHCl <sub>3</sub>           | 51                     | 71                  |
| 5               | (S)-cat. 4 | Cs <sub>2</sub> CO <sub>3</sub> (0.2) | chlorobenzene               | 45                     | 68                  |
| 6               | (S)-cat. 4 | Cs <sub>2</sub> CO <sub>3</sub> (0.2) | xylene                      | 50                     | 52                  |
| 7               | (S)-cat. 4 | Cs <sub>2</sub> CO <sub>3</sub> (0.2) | mesitylene                  | trace                  | 2                   |
| 8               | (S)-cat. 4 | Cs <sub>2</sub> CO <sub>3</sub> (0.2) | THF                         | trace                  | 4                   |
| 9               | (S)-cat. 4 | Cs <sub>2</sub> CO <sub>3</sub> (0.2) | MTBE                        | trace                  | 11                  |
| 10              | (S)-cat. 4 | Cs <sub>2</sub> CO <sub>3</sub> (0.2) | 1,4-dioxane                 | 49                     | 16                  |
| 11              | (S)-cat. 4 | Cs <sub>2</sub> CO <sub>3</sub> (0.2) | EtOAc                       | trace                  | 49                  |
| 12              | (S)-cat. 4 | Cs <sub>2</sub> CO <sub>3</sub> (0.2) | CH <sub>3</sub> CN          | trace                  | 1                   |
| 13              | (S)-cat. 4 | Cs <sub>2</sub> CO <sub>3</sub> (0.2) | DMF                         | trace                  | 1                   |
| 14              | (S)-cat. 4 | Cs <sub>2</sub> CO <sub>3</sub> (0.2) | DMSO                        | 48                     | 0                   |
| 15              | (S)-cat. 4 | Cs <sub>2</sub> CO <sub>3</sub> (0.2) | DCM+H <sub>2</sub> O (5 μL) | 43                     | 65                  |
| 16              | (S)-cat. 4 | Cs <sub>2</sub> CO <sub>3</sub> (0.2) | DCM+DMSO (5 μL)             | 58                     | 31                  |
| 17              | (S)-cat. 4 | Li <sub>2</sub> CO <sub>3</sub> (0.2) | DCM                         | trace                  | 0                   |
| 18              | (S)-cat. 4 | Na <sub>2</sub> CO <sub>3</sub> (0.2) | DCM                         | trace                  | 2                   |
| 19              | (S)-cat. 4 | NaOEt (0.2)                           | DCM                         | 57                     | 73                  |
| 20              | (S)-cat. 4 | K <sub>2</sub> HPO <sub>4</sub> (0.2) | DCM                         | 53                     | 7                   |
| 21              | (S)-cat. 4 | <i>t</i> -BuOK (0.2)                  | DCM                         | NR <sup>d</sup>        | -                   |
| 22              | (S)-cat. 4 | CsOH·H <sub>2</sub> O (0.2)           | DCM                         | NR                     | -                   |
| 23              | (S)-cat. 4 | Et <sub>3</sub> N (0.2)               | DCM                         | trace                  | 18                  |
| 24              | (S)-cat. 4 | DBU (0.2)                             | DCM                         | 54                     | 26                  |
| 25              | (S)-cat. 4 | Cs <sub>2</sub> CO <sub>3</sub> (0.1) | DCM                         | trace                  | 65                  |
| 26              | (S)-cat. 4 | Cs <sub>2</sub> CO <sub>3</sub> (0.4) | DCM                         | 51                     | 67                  |
| 27              | (S)-cat. 4 | Cs <sub>2</sub> CO <sub>3</sub> (0.6) | DCM                         | 58                     | 61                  |
| 28              | (S)-cat. 4 | Cs <sub>2</sub> CO <sub>3</sub> (0.8) | DCM                         | 78                     | 52                  |
| 29              | (S)-cat. 4 | Cs <sub>2</sub> CO <sub>3</sub> (1.0) | DCM                         | 77                     | 27                  |
| 30              | (S)-cat. 4 | Cs <sub>2</sub> CO <sub>3</sub> (1.5) | DCM                         | 81                     | 26                  |
| 31              | (S)-cat. 4 | Cs <sub>2</sub> CO <sub>3</sub> (2.0) | DCM                         | 80                     | 15                  |
| 32 <sup>e</sup> | (S)-cat. 4 | Cs <sub>2</sub> CO <sub>3</sub> (2.0) | DCM                         | 30                     | 69                  |
| 33 <sup>f</sup> | (S)-cat. 4 | Cs <sub>2</sub> CO <sub>3</sub> (2.0) | DCM                         | 42                     | 63                  |
| 34 <sup>g</sup> | (S)-cat. 4 | Cs <sub>2</sub> CO <sub>3</sub> (2.0) | DCM                         | 75                     | 66                  |

<sup>a</sup>Reactions were conducted with **1a** (0.05 mmol, 1.0 equiv.), catalyst (20 mol%), and base in solvent (0.5 mL). <sup>b</sup>Isolated yield. <sup>c</sup>Ee determined by UPC<sup>2</sup>. <sup>d</sup>Not detected. <sup>e</sup>The reaction was carried out at 0 °C. <sup>f</sup>The reaction was carried out at -10 °C. <sup>g</sup>The reaction was carried out at 30 °C.

## 5. General Procedure

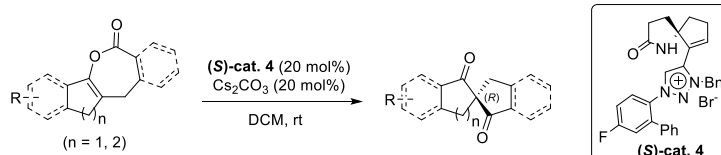

Enol lactones (0.05 mmol, 1.0 equiv), (S)-cat. 4 (0.01 mmol, 0.2 equiv), and Cs<sub>2</sub>CO<sub>3</sub> (0.01 mmol, 0.2 equiv) were dissolved in DCM (0.5 mL) at room temperature and the reaction mixture was stirred at the same temperature until consumption of enol lactones detected by TLC. The solution was then quenched with saturated NaHCO<sub>3</sub> (2 mL) and extracted by DCM (3 mL×3). The combined organic layer was washed with brine (10 mL), dried over anhydrous Na<sub>2</sub>SO<sub>4</sub>, and evaporated under reduced pressure. The residue was purified by flash chromatography on silica gel to afford spirocyclic 1,3-diketones.

## 6. Characterization Data

### (R)-5'-chlorospiro[cyclopentane-1,2'-indene]-1',2(3'H)-dione (2a)

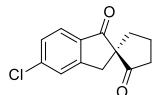

Following the above general procedure, **2a** was obtained in 80% yield (9.36 mg) with 87% ee as a white solid (m.p. = 86-88 °C).  $[\alpha]_D^{24} = 19$  (c = 1.0, CH<sub>2</sub>Cl<sub>2</sub>).

**<sup>1</sup>H NMR** (400 MHz, CDCl<sub>3</sub>) δ 7.64 (d, *J* = 8.2 Hz, 1H), 7.48 (d, *J* = 1.0 Hz, 1H), 7.38-7.35 (m, 1H), 3.47 (d, *J* = 17.2 Hz, 1H), 2.91 (d, *J* = 17.2 Hz, 1H), 2.63-2.55 (m, 2H), 2.49-2.33 (m, 2H), 2.09-2.01 (m, 2H). **<sup>13</sup>C NMR** (101 MHz, CDCl<sub>3</sub>) δ 215.3, 202.2, 154.8, 141.8, 133.7, 128.6, 126.5, 125.5, 65.0, 37.8, 37.4, 34.5, 19.5. **HRMS** (ESI) *m/z* calculated for C<sub>13</sub>H<sub>11</sub>ClO<sub>2</sub>Na [M+Na]<sup>+</sup> 257.0340, found 257.0334. **FT-IR** (cm<sup>-1</sup>): 2960, 2921, 2851, 1740, 1700, 1598, 1578, 1261, 1204, 1070, 1019, 904, 799.

The ee value was determined by the chiral UPC<sup>2</sup> analysis (Trefoil™ CEL2, CO<sub>2</sub>/MeOH = 80/20, v = 2.0 mL/min, λ = 254.5 nm, *t*<sub>major</sub> = 0.699 min, *t*<sub>minor</sub> = 0.789 min).

### (R)-5'-bromospiro[cyclopentane-1,2'-indene]-1',2(3'H)-dione (2b)

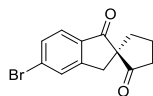

Following the above general procedure, **2b** was obtained in 70% yield (9.73 mg) with 86% ee as a white solid (m.p. = 94-95 °C).  $[\alpha]_D^{26} = 18$  (c = 1.0, CH<sub>2</sub>Cl<sub>2</sub>).

**<sup>1</sup>H NMR** (400 MHz, CDCl<sub>3</sub>) δ 7.65 (d, *J* = 1.6 Hz, 1H), 7.56 (d, *J* = 8.2 Hz, 1H), 7.52 (dd, *J* = 8.3, 1.5 Hz, 1H), 3.47 (d, *J* = 17.2 Hz, 1H), 2.90 (d, *J* = 17.2 Hz, 1H), 2.62-2.53 (m, 2H), 2.48-2.32 (m, 2H), 2.11-1.99 (m, 2H). **<sup>13</sup>C NMR** (101 MHz, CDCl<sub>3</sub>) δ 215.1, 202.4, 154.9, 134.0, 131.4, 130.6, 129.5, 125.5, 64.9, 37.7, 37.3, 34.5, 19.4. **HRMS** (ESI) *m/z* calculated for C<sub>13</sub>H<sub>11</sub>BrO<sub>2</sub>Na [M+Na]<sup>+</sup> 300.9835, found 300.9833. **FT-IR** (cm<sup>-1</sup>): 2960, 2920, 2851, 1741, 1699, 1594, 1461, 1413, 1261, 1096, 1019, 900, 800.

The ee value was determined by the chiral UPC<sup>2</sup> analysis (Trefoil™ CEL2, CO<sub>2</sub>/MeOH = 80/20, v = 2.0 mL/min, λ = 258.1 nm, *t*<sub>major</sub> = 0.786 min, *t*<sub>minor</sub> = 0.910 min).

### (R)-5'-fluorospiro[cyclopentane-1,2'-indene]-1',2(3'H)-dione (2c)

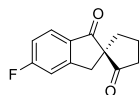

Following the above general procedure, **2c** was obtained in 73% yield (7.96 mg) with 66% ee as a white solid (m.p. = 47-49 °C).  $[\alpha]_D^{25} = 16$  (c = 1.0, CH<sub>2</sub>Cl<sub>2</sub>).

**<sup>1</sup>H NMR** (400 MHz, CDCl<sub>3</sub>) δ 7.71 (dd, *J* = 8.4, 5.3 Hz, 1H), 7.14 (dd, *J* = 8.4, 2.1 Hz, 1H), 7.13-7.06 (m, 1H), 3.48 (d, *J* = 17.2 Hz, 1H), 2.91 (d, *J* = 17.3 Hz, 1H), 2.63-2.53 (m, 2H), 2.49-2.32 (m, 2H), 2.11-1.98 (m, 2H). **<sup>13</sup>C NMR** (101 MHz, CDCl<sub>3</sub>) δ 215.4, 201.8, 167.3 (d, *J* = 257.2 Hz), 156.3 (d, *J* = 10.3 Hz), 131.5 (d, *J* = 1.7 Hz), 126.7 (d, *J* = 10.6 Hz), 116.1 (d, *J* = 24.0 Hz), 112.9 (d, *J* = 22.5 Hz), 65.1, 37.8, 37.6 (d, *J* = 2.3 Hz), 34.5, 19.4. **<sup>19</sup>F NMR** (376 MHz, CDCl<sub>3</sub>) δ -102.0. **HRMS** (ESI) *m/z* calculated for C<sub>13</sub>H<sub>11</sub>FO<sub>2</sub>Na [M+Na]<sup>+</sup> 241.0635, found 241.0635. **FT-IR** (cm<sup>-1</sup>): 2963, 2919, 2850, 1708, 1260, 1088, 1019, 864, 799.

The ee value was determined by the chiral UPC<sup>2</sup> analysis (Trefoil™ CEL2, CO<sub>2</sub>/MeOH = 80/20, v = 2.0 mL/min, λ = 246.2

nm,  $t_{\text{major}} = 0.566$  min,  $t_{\text{minor}} = 0.613$  min).

### (*R*)-spiro[cyclopentane-1,2'-indene]-1',2(3'H)-dione (**2d**)

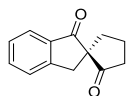

Following the above general procedure, **2d** was obtained in 65% yield (6.50 mg) with 75% ee as a white solid (m.p. = 53-54 °C).  $[\alpha]_{\text{D}}^{23} = 34$  ( $c = 1.0$ ,  $\text{CH}_2\text{Cl}_2$ ).

**<sup>1</sup>H NMR** (400 MHz,  $\text{CDCl}_3$ )  $\delta$  7.70 (d,  $J = 7.8$  Hz, 1H), 7.59 (t,  $J = 7.5$  Hz, 1H), 7.46 (d,  $J = 7.7$  Hz, 1H), 7.37 (t,  $J = 7.5$  Hz, 1H), 3.49 (d,  $J = 17.0$  Hz, 1H), 2.92 (d,  $J = 17.0$  Hz, 1H), 2.62-2.53 (m, 2H), 2.47-2.32 (m, 2H), 2.11-1.98 (m, 2H).

**<sup>13</sup>C NMR** (101 MHz,  $\text{CDCl}_3$ )  $\delta$  215.7, 203.7, 153.4, 135.2, 135.0, 127.7, 126.1, 124.4, 64.7, 37.9, 37.8, 34.6, 19.5. **HRMS** (ESI)  $m/z$  calculated for  $\text{C}_{13}\text{H}_{12}\text{O}_2\text{Na}$   $[\text{M}+\text{Na}]^+$  223.0730, found 223.0728. **FT-IR** ( $\text{cm}^{-1}$ ): 2958, 2918, 1739, 1698, 1606, 1463, 1427, 1276, 1151, 992, 902, 767.

The ee value was determined by the chiral UPC<sup>2</sup> analysis (Trefoil<sup>TM</sup> CEL2,  $\text{CO}_2/\text{MeOH} = 95/5$ ,  $v = 2.0$  mL/min,  $\lambda = 241.5$  nm,  $t_{\text{major}} = 1.528$  min,  $t_{\text{minor}} = 1.654$  min).

### (*R*)-5'-methoxyspiro[cyclopentane-1,2'-indene]-1',2(3'H)-dione (**2e**)

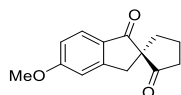

Following the above general procedure, **2e** was obtained in 58% yield (7.96 mg) with 40% ee as a white solid (m.p. = 77-79 °C).  $[\alpha]_{\text{D}}^{25} = 15$  ( $c = 1.0$ ,  $\text{CH}_2\text{Cl}_2$ ).

**<sup>1</sup>H NMR** (400 MHz,  $\text{CDCl}_3$ )  $\delta$  7.62 (d,  $J = 9.2$  Hz, 1H), 6.91-6.89 (m, 2H), 3.87 (s, 3H), 3.43 (d,  $J = 17.0$  Hz, 1H), 2.86 (d,  $J = 17.0$  Hz, 1H), 2.61-2.50 (m, 2H), 2.47-2.30 (m, 2H), 2.09-1.96 (m, 2H). **<sup>13</sup>C NMR** (101 MHz,  $\text{CDCl}_3$ )  $\delta$  216.1, 201.7, 165.6, 156.4, 128.3, 126.0, 115.8, 109.3, 64.9, 55.6, 37.8, 37.7, 34.6, 19.4. **HRMS** (ESI)  $m/z$  calculated for  $\text{C}_{14}\text{H}_{14}\text{O}_3\text{Na}$   $[\text{M}+\text{Na}]^+$  253.0835, found 253.0834. **FT-IR** ( $\text{cm}^{-1}$ ): 2944, 2882, 2838, 1731, 1682, 1606, 1490, 1338, 1300, 926, 846, 750.

The ee value was determined by the chiral UPC<sup>2</sup> analysis (Trefoil<sup>TM</sup> CEL2,  $\text{CO}_2/\text{MeOH} = 80/20$ ,  $v = 2.0$  mL/min,  $\lambda = 267.6$  nm,  $t_{\text{major}} = 0.864$  min,  $t_{\text{minor}} = 1.013$  min).

### (*R*)-5'-phenylspiro[cyclopentane-1,2'-indene]-1',2(3'H)-dione (**2f**)

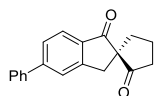

Following the above general procedure, **2f** was obtained in 55% yield (7.59 mg) with 78% ee as a white solid (m.p. = 115-117 °C).  $[\alpha]_{\text{D}}^{25} = 14$  ( $c = 1.0$ ,  $\text{CH}_2\text{Cl}_2$ ).

**<sup>1</sup>H NMR** (400 MHz,  $\text{CDCl}_3$ )  $\delta$  7.77 (d,  $J = 8.0$  Hz, 1H), 7.65 (d,  $J = 1.5$  Hz, 1H), 7.63-7.59 (m, 3H), 7.50-7.43 (m, 2H), 7.42-7.39 (m, 1H), 3.55 (d,  $J = 17.0$  Hz, 1H), 2.97 (d,  $J = 17.0$  Hz, 1H), 2.66-2.55 (m, 2H), 2.52-2.34 (m, 2H), 2.14-1.99 (m, 2H). **<sup>13</sup>C NMR** (151 MHz,  $\text{CDCl}_3$ )  $\delta$  215.8, 203.3, 154.1, 148.2, 140.0, 134.1, 128.9, 128.4, 127.5, 127.2, 124.8, 124.7, 65.1, 37.9, 37.9, 34.7, 19.5. **HRMS** (ESI)  $m/z$  calculated for  $\text{C}_{19}\text{H}_{16}\text{O}_2\text{Na}$   $[\text{M}+\text{Na}]^+$  299.1043, found 299.1042. **FT-IR** ( $\text{cm}^{-1}$ ): 3359, 2920, 2850, 1739, 1694, 1632, 1603, 1466, 1418, 1120, 1074, 1040, 766, 696.

The ee value was determined by the chiral UPC<sup>2</sup> analysis (Trefoil<sup>TM</sup> CEL2,  $\text{CO}_2/\text{MeOH} = 80/20$ ,  $v = 2.0$  mL/min,  $\lambda = 280.6$  nm,  $t_{\text{major}} = 1.227$  min,  $t_{\text{minor}} = 1.624$  min).

**(R)-5'-(p-tolyl)spiro[cyclopentane-1,2'-indene]-1',2(3'H)-dione (2g)**

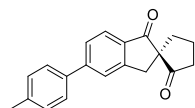

Following the above general procedure, **2g** was obtained in 56% yield (8.12 mg) with 62% ee as a white solid (m.p. = 150-152 °C).  $[\alpha]_D^{25} = 19$  (c = 1.0, CH<sub>2</sub>Cl<sub>2</sub>).

**<sup>1</sup>H NMR** (600 MHz, CDCl<sub>3</sub>) δ 7.75 (d, *J* = 8.0 Hz, 1H), 7.63 (s, 1H), 7.58 (d, *J* = 8.0 Hz, 1H), 7.51 (d, *J* = 8.1 Hz, 2H), 7.27 (d, *J* = 7.9 Hz, 2H), 3.53 (d, *J* = 16.9 Hz, 1H), 2.95 (d, *J* = 16.9 Hz, 1H), 2.64-2.56 (m, 2H), 2.49-2.44 (m, 1H), 2.43-2.35 (m, 4H), 2.11-2.01 (m, 2H). **<sup>13</sup>C NMR** (151 MHz, CDCl<sub>3</sub>) δ 215.9, 203.2, 154.1, 148.1, 138.4, 137.1, 133.8, 129.6, 127.3, 127.0, 124.8, 124.3, 65.1, 37.9, 37.9, 34.7, 21.1, 19.5. **HRMS** (ESI) *m/z* calculated for C<sub>20</sub>H<sub>18</sub>O<sub>2</sub>Na [M+Na]<sup>+</sup> 313.1199, found 313.1198. **FT-IR** (cm<sup>-1</sup>): 2964, 1739, 1694, 1605, 1420, 1401, 1279, 1154, 907, 812.

The ee value was determined by the chiral UPC<sup>2</sup> analysis (Trefoil™ CEL2, CO<sub>2</sub>/MeOH = 80/20, *v* = 2.0 mL/min, λ = 290.1 nm, *t*<sub>major</sub> = 1.272 min, *t*<sub>minor</sub> = 1.668 min).

**(R)-5'-(4-(trifluoromethyl)phenyl)spiro[cyclopentane-1,2'-indene]-1',2(3'H)-dione (2h)**

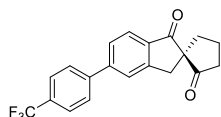

Following the above general procedure, **2h** was obtained in 55% yield (9.46 mg) with 81% ee as a white solid (m.p. = 103-105 °C).  $[\alpha]_D^{25} = 18$  (c = 1.0, CH<sub>2</sub>Cl<sub>2</sub>).

**<sup>1</sup>H NMR** (400 MHz, CDCl<sub>3</sub>) δ 7.79 (d, *J* = 8.0 Hz, 1H), 7.74-7.70 (m, 4H), 7.66 (s, 1H), 7.59 (d, *J* = 8.0 Hz, 1H), 3.56 (d, *J* = 17.0 Hz, 1H), 2.99 (d, *J* = 17.0 Hz, 1H), 2.67-2.56 (m, 2H), 2.51-2.36 (m, 2H), 2.15-2.02 (m, 2H). **<sup>13</sup>C NMR** (101 MHz, CDCl<sub>3</sub>) δ 215.6, 203.1, 154.1, 146.5, 143.5, 134.8, 130.3 (q, *J* = 32.0 Hz), 124.0 (q, *J* = 270 Hz), 127.8, 127.3, 125.8 (q, *J* = 4.0 Hz), 125.0, 65.2, 37.9, 37.8, 34.6, 19.5. **<sup>19</sup>F NMR** (376 MHz, CDCl<sub>3</sub>) δ -62.5. **HRMS** (ESI) *m/z* calculated for C<sub>20</sub>H<sub>15</sub>F<sub>3</sub>O<sub>2</sub>Na [M+Na]<sup>+</sup> 367.0916, found 367.0919. **FT-IR** (cm<sup>-1</sup>): 2920, 1742, 1700, 1609, 1427, 1400, 1326, 1286, 1214, 1167, 1124, 1070, 1014, 907, 834.

The ee value was determined by the chiral UPC<sup>2</sup> analysis (Trefoil™ CEL2, CO<sub>2</sub>/MeOH = 80/20, *v* = 2.0 mL/min, λ = 274.7 nm, *t*<sub>major</sub> = 0.777 min, *t*<sub>minor</sub> = 0.969 min).

**(R)-5'-(naphthalen-2-yl)spiro[cyclopentane-1,2'-indene]-1',2(3'H)-dione (2i)**

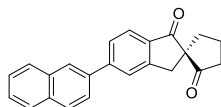

Following the above general procedure, **2i** was obtained in 61% yield (9.95 mg) with 75% ee as a yellow solid (m.p. = 134-136 °C).  $[\alpha]_D^{25} = 35$  (c = 1.0, CH<sub>2</sub>Cl<sub>2</sub>).

**<sup>1</sup>H NMR** (400 MHz, CDCl<sub>3</sub>) δ 8.07 (s, 1H), 7.94-7.86 (m, 3H), 7.81-7.71 (m, 4H), 7.53-7.51 (m, 2H), 3.57 (d, *J* = 17.0 Hz, 1H), 2.98 (d, *J* = 17.0 Hz, 1H), 2.67-2.57 (m, 2H), 2.51-2.36 (m, 2H), 2.14-2.02 (m, 2H). **<sup>13</sup>C NMR** (101 MHz, CDCl<sub>3</sub>) δ 215.9, 203.3, 154.2, 148.1, 137.3, 134.1, 133.5, 133.1, 128.7, 128.4, 127.7, 127.5, 126.7, 126.6, 125.3, 124.9, 124.9, 65.2, 37.9, 37.9, 34.7, 19.6. **HRMS** (ESI) *m/z* calculated for C<sub>23</sub>H<sub>18</sub>O<sub>2</sub>Na [M+Na]<sup>+</sup> 349.1199, found 349.1198. **FT-IR** (cm<sup>-1</sup>): 3055, 2920, 1738, 1694, 1606, 1423, 1271, 1213, 1152, 911, 847, 737.

The ee value was determined by the chiral UPC<sup>2</sup> analysis (CHIRALPAK® AD-3, CO<sub>2</sub>/MeOH = 80/20, *v* = 2.0 mL/min, λ = 272.3 nm, *t*<sub>major</sub> = 6.249 min, *t*<sub>minor</sub> = 7.736 min).

**(R)-5'-(thiophen-2-yl)spiro[cyclopentane-1,2'-indene]-1',2(3'H)-dione (2j)**

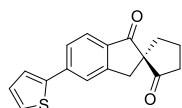

Following the above general procedure, **2j** was obtained in 51% yield (7.19 mg) with 63% ee as an yellow solid (m.p. = 130-132 °C).  $[\alpha]_D^{23} = 38$  (c = 1.0, CH<sub>2</sub>Cl<sub>2</sub>).

**<sup>1</sup>H NMR** (400 MHz, CDCl<sub>3</sub>) δ 7.51-7.47 (m, 2H), 7.43 (dd, *J* = 8.0, 1.5 Hz, 1H), 7.24 (dd, *J* = 3.7, 1.2 Hz, 1H), 7.19 (dd, *J* = 5.1, 1.2 Hz, 1H), 6.92 (dd, *J* = 5.1, 3.6 Hz, 1H), 3.31 (d, *J* = 17.0 Hz, 1H), 2.73 (d, *J* = 17.0 Hz, 1H), 2.44-2.35 (m, 2H), 2.29-2.15 (m, 2H), 1.92 -1.79 (m, 2H). **<sup>13</sup>C NMR** (101 MHz, CDCl<sub>3</sub>) δ 215.7, 202.8, 154.3, 142.9, 140.9, 134.0, 128.4, 126.9, 125.7, 125.1, 125.0, 122.8, 65.1, 37.9, 37.7, 34.7, 19.5. **HRMS** (ESI) *m/z* calculated for C<sub>17</sub>H<sub>14</sub>O<sub>2</sub>SNa [M+Na]<sup>+</sup> 305.0607, found 305.0608. **FT-IR** (cm<sup>-1</sup>): 2957, 2920, 2849, 1738, 1693, 1604, 1422, 1321, 1210, 990, 827, 716.

The ee value was determined by the chiral UPC<sup>2</sup> analysis (Trefoil™ CEL2, CO<sub>2</sub>/MeOH = 80/20, *v* = 2.0 mL/min, λ = 323.5 nm, *t*<sub>major</sub> = 1.595 min, *t*<sub>minor</sub> = 2.131 min).

**(R)-6'-methylspiro[cyclopentane-1,2'-indene]-1',2(3'H)-dione (2k)**

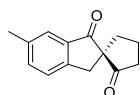

Following the above general procedure, **2k** was obtained in 75% yield (8.03 mg) with 83% ee as an white solid (m.p. = 80-82 °C).  $[\alpha]_D^{24} = 42$  (c = 1.0, CH<sub>2</sub>Cl<sub>2</sub>).

**<sup>1</sup>H NMR** (600 MHz, CDCl<sub>3</sub>) δ 7.50 (s, 1H), 7.41 (d, *J* = 7.8 Hz, 1H), 7.35 (d, *J* = 7.8 Hz, 1H), 3.44 (d, *J* = 16.8 Hz, 1H), 2.87 (d, *J* = 16.8 Hz, 1H), 2.61-2.53 (m, 2H), 2.47-2.33 (m, 5H), 2.09-2.04 (m, 1H), 2.03-1.99 (m, 1H). **<sup>13</sup>C NMR** (101 MHz, CDCl<sub>3</sub>) δ 215.9, 203.9, 150.9, 137.8, 136.4, 135.5, 125.9, 124.4, 65.2, 38.0, 37.6, 34.7, 21.1, 19.6. **HRMS** (ESI) *m/z* calculated for C<sub>14</sub>H<sub>14</sub>O<sub>2</sub>Na [M+Na]<sup>+</sup> 237.0886, found 237.0878. **FT-IR** (cm<sup>-1</sup>): 2962, 2919, 2850, 1738, 1695, 1616, 1492, 1261, 1155, 1095, 1019, 800, 761.

The ee value was determined by the chiral UPC<sup>2</sup> analysis (CHIRALPAK® AD-3, CO<sub>2</sub>/MeOH = 80/20, *v* = 2.0 mL/min, λ = 245.0 nm, *t*<sub>major</sub> = 0.871 min, *t*<sub>minor</sub> = 1.068 min).

**(R)-6'-chlorospiro[cyclopentane-1,2'-indene]-1',2(3'H)-dione (2l)**

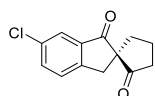

Following the above general procedure, **2l** was obtained in 64% yield (8.03 mg) with 67% ee as an white solid (m.p. = 103-105 °C).  $[\alpha]_D^{24} = 20$  (c = 1.0, CH<sub>2</sub>Cl<sub>2</sub>).

**<sup>1</sup>H NMR** (600 MHz, CDCl<sub>3</sub>) δ 7.65 (d, *J* = 2.0 Hz, 1H), 7.55 (dd, *J* = 8.2, 2.1 Hz, 1H), 7.41 (d, *J* = 8.1 Hz, 1H), 3.44 (d, *J* = 17.0 Hz, 1H), 2.88 (d, *J* = 17.0 Hz, 1H), 2.61-2.54 (m, 2H), 2.45-2.33 (m, 2H), 2.10-1.99 (m, 2H). **<sup>13</sup>C NMR** (151 MHz, CDCl<sub>3</sub>) δ 215.1, 202.4, 151.5, 136.7, 135.0, 134.1, 127.4, 124.1, 65.4, 37.8, 37.3, 34.5, 19.5. **HRMS** (ESI) *m/z* calculated for C<sub>13</sub>H<sub>11</sub>ClO<sub>2</sub>Na [M+Na]<sup>+</sup> 257.0340, found 257.0339. **FT-IR** (cm<sup>-1</sup>): 2945, 2883, 2827, 1734, 1702, 1466, 1429, 1252, 1147, 886, 847, 831, 746.

The ee value was determined by the chiral UPC<sup>2</sup> analysis (Trefoil™ CEL2, CO<sub>2</sub>/MeOH = 95/05, *v* = 2.0 mL/min, λ = 240.3 nm, *t*<sub>major</sub> = 1.553 min, *t*<sub>minor</sub> = 1.682 min).

**(R)-4'-chlorospiro[cyclopentane-1,2'-indene]-1',2(3'H)-dione (2m)**

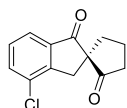

Following the above general procedure, **2m** was obtained in 75% yield (8.78 mg) with 70% ee as a white solid (m.p. = 70-73 °C).  $[\alpha]_D^{24} = 30$  (c = 1.0, CH<sub>2</sub>Cl<sub>2</sub>).

**<sup>1</sup>H NMR** (600 MHz, CDCl<sub>3</sub>) δ 7.62-7.59 (m, 2H), 7.36 (t, *J* = 7.7 Hz, 1H), 3.49 (d, *J* = 17.5 Hz, 1H), 2.90 (d, *J* = 17.5 Hz, 1H), 2.63-2.56 (m, 2H), 2.49-2.37 (m, 2H), 2.14-2.08 (m, 1H), 2.07-2.02 (m, 1H). **<sup>13</sup>C NMR** (151 MHz, CDCl<sub>3</sub>) δ 215.2, 203.0, 151.1, 137.1, 134.8, 132.5, 129.4, 122.7, 64.8, 37.9, 36.9, 34.7, 19.6. **HRMS** (ESI) *m/z* calculated for C<sub>13</sub>H<sub>11</sub>ClO<sub>2</sub>Na [M+Na]<sup>+</sup> 257.0340, found 257.0339. **FT-IR** (cm<sup>-1</sup>): 3358, 2920, 2850, 1743, 1706, 1659, 1633, 1461, 1421, 1331, 1263, 1134, 996, 913, 738.

The ee value was determined by the chiral UPC<sup>2</sup> analysis (Trefoil™ CEL2, CO<sub>2</sub>/MeOH = 80/20, v = 2.0 mL/min, λ = 246.2 nm, t<sub>major</sub> = 0.672 min, t<sub>minor</sub> = 0.736 min).

**(R)-4'-bromospiro[cyclopentane-1,2'-indene]-1',2(3'H)-dione (2n)**

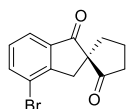

Following the above general procedure, **2n** was obtained in 70% yield (9.73 mg) with 63% ee as a white solid (m.p. = 69-70 °C).  $[\alpha]_D^{26} = 5$  (c = 1.0, CH<sub>2</sub>Cl<sub>2</sub>).

**<sup>1</sup>H NMR** (400 MHz, CDCl<sub>3</sub>) δ 7.78 (dd, *J* = 7.7, 1.0 Hz, 1H), 7.67 (dd, *J* = 7.7, 1.0 Hz, 1H), 7.32-7.26 (m, 1H), 3.45 (d, *J* = 17.5 Hz, 1H), 2.86 (d, *J* = 17.6 Hz, 1H), 2.64-2.55 (m, 2H), 2.52-2.35 (m, 2H), 2.15-2.02 (m, 2H). **<sup>13</sup>C NMR** (101 MHz, CDCl<sub>3</sub>) δ 215.0, 203.1, 153.1, 137.8, 137.1, 129.5, 123.3, 121.7, 64.8, 38.9, 37.9, 34.7, 19.5. **HRMS** (ESI) *m/z* calculated for C<sub>13</sub>H<sub>11</sub>BrO<sub>2</sub> [M+Na]<sup>+</sup> 300.9835, found 300.9834. **FT-IR** (cm<sup>-1</sup>): 2945, 2883, 2821, 1741, 1703, 1457, 1329, 1123, 909, 786, 752.

The ee value was determined by the chiral UPC<sup>2</sup> analysis (Trefoil™ CEL2, CO<sub>2</sub>/MeOH = 80/20, v = 2.0 mL/min, λ = 252.1 nm, t<sub>major</sub> = 0.764 min, t<sub>minor</sub> = 0.853 min).

**(R)-3',4'-dihydro-1'H-spiro[cyclopentane-1,2'-naphthalene]-1',2-dione (2o)**

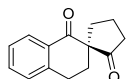

Following the above general procedure, **2o** was obtained in 80% yield (8.56 mg) with 58% ee as an amorphous solid.  $[\alpha]_D^{25} = 26$  (c = 1.0, CH<sub>2</sub>Cl<sub>2</sub>).

**<sup>1</sup>H NMR** (400 MHz, CDCl<sub>3</sub>) δ 7.98 (dd, *J* = 7.9, 1.4 Hz, 1H), 7.47 (td, *J* = 7.5, 1.5 Hz, 1H), 7.29 (t, *J* = 7.0 Hz, 1H), 7.23 (d, *J* = 7.7 Hz, 1H), 3.14-3.07 (m, 1H), 3.00-2.92 (m, 1H), 2.58-2.43 (m, 3H), 2.39-2.30 (m, 1H), 2.17-2.06 (m, 1H), 2.04-1.90 (m, 3H). **<sup>13</sup>C NMR** (101 MHz, CDCl<sub>3</sub>) δ 217.3, 197.5, 143.6, 133.6, 131.0, 128.6, 127.6, 126.7, 60.4, 38.7, 33.6, 30.3, 25.4, 19.0. **HRMS** (ESI) *m/z* calculated for C<sub>14</sub>H<sub>14</sub>O<sub>2</sub>Na [M+Na]<sup>+</sup> 237.0886, found 237.0885. **FT-IR** (cm<sup>-1</sup>): 3066, 2936, 1712, 1673, 1601, 1455, 1295, 1226, 947, 847, 740.

The ee value was determined by the chiral UPC<sup>2</sup> analysis (Trefoil™ CEL2, CO<sub>2</sub>/MeOH = 95/5, v = 2.0 mL/min, λ = 246.2 nm, t<sub>major</sub> = 2.199 min, t<sub>minor</sub> = 2.516 min).

**(R)-spiro[4.4]nonane-1,6-dione (2p)**

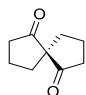

Following the above general procedure, **2p** was obtained in 73% yield (5.55 mg) with 39% ee as a white solid (m.p. = 32-34 °C).  $[\alpha]_D^{25} = 2$  (c = 1.0, CH<sub>2</sub>Cl<sub>2</sub>).

**<sup>1</sup>H NMR** (400 MHz, CDCl<sub>3</sub>) δ 2.43-2.25 (m, 6H), 2.23-2.13 (m, 2H), 1.96-1.87 (m, 2H), 1.86-1.79 (m, 2H). **<sup>13</sup>C NMR** (151 MHz, CDCl<sub>3</sub>) δ 216.7, 64.3, 38.4, 34.2, 19.7. **FT-IR** (cm<sup>-1</sup>): 2959, 2919, 2850, 1746, 1716, 1658, 1632, 1406, 1313, 1157, 1065, 916.

The ee value was determined by the chiral UPC<sup>2</sup> analysis (Trefoil™ CEL2, CO<sub>2</sub>/MeOH = 95/5, v = 2.0 mL/min, λ = 202.6 nm, t<sub>major</sub> = 0.641 min, t<sub>minor</sub> = 0.684 min).

**(R)-5-chloro-2,2'-spirobi[indene]-1,1'(3H,3'H)-dione (2q)**

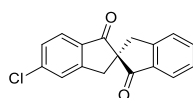

Following the above general procedure, **2q** was obtained in 84% yield (11.85 mg) with 87% ee as a white solid (m.p. = 181-183 °C).  $[\alpha]_D^{25} = 28$  (c = 1.0, CH<sub>2</sub>Cl<sub>2</sub>).

**<sup>1</sup>H NMR** (400 MHz, CDCl<sub>3</sub>) δ 7.75 (d, J = 7.7 Hz, 1H), 7.69-7.64 (m, 2H), 7.56 (dt, J = 4.7, 2.1 Hz, 2H), 7.43-7.38 (m, 2H), 3.70 (dd, J = 17.0, 14.8 Hz, 2H), 3.17 (dd, J = 17.0, 8.9 Hz, 2H). **<sup>13</sup>C NMR** (101 MHz, CDCl<sub>3</sub>) δ 202.1, 201.0, 155.1, 153.6, 141.8, 135.3, 135.1, 133.8, 128.5, 127.8, 126.5, 126.3, 125.7, 124.8, 65.4, 37.7, 37.5. **FT-IR** (cm<sup>-1</sup>): 1715, 1693, 1599, 1464, 1421, 1318, 1206, 1136, 1068, 1034.

The ee value was determined by the chiral UPC<sup>2</sup> analysis (Trefoil™ CEL2, CO<sub>2</sub>/MeOH = 80/20, v = 2.0 mL/min, λ = 251.0 nm, t<sub>major</sub> = 1.309 min, t<sub>minor</sub> = 1.559 min).

**(R)-5-fluoro-2,2'-spirobi[indene]-1,1'(3H,3'H)-dione (2r)**

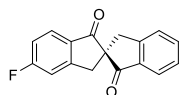

Following the above general procedure, **2r** was obtained in 65% yield (8.65 mg) with 63% ee as a white solid (m.p. = 175-176 °C).  $[\alpha]_D^{25} = 14$  (c = 1.0, CH<sub>2</sub>Cl<sub>2</sub>).

**<sup>1</sup>H NMR** (400 MHz, CDCl<sub>3</sub>) δ 7.76 (dt, J = 8.7, 3.0 Hz, 2H), 7.66 (td, J = 7.5, 1.2 Hz, 1H), 7.56 (dt, J = 7.7, 1.0 Hz, 1H), 7.43-7.39 (m, 1H), 7.22 (dd, J = 8.4, 2.2 Hz, 1H), 7.11 (td, J = 8.6, 2.3 Hz, 1H), 3.71 (dd, J = 17.1, 11.6 Hz, 2H), 3.18 (dd, J = 17.1, 5.5 Hz, 2H). **<sup>13</sup>C NMR** (151 MHz, CDCl<sub>3</sub>) δ 202.3, 200.7, 167.5 (d, J = 257.5 Hz), 156.7 (d, J = 10.5 Hz), 153.7, 135.4, 135.2, 131.8 (d, J = 1.8 Hz), 127.8, 127.1 (d, J = 10.7 Hz), 126.3, 124.9, 116.2 (d, J = 24.0 Hz), 113.1 (d, J = 22.4 Hz), 65.6, 37.8, 37.7 (d, J = 2.3 Hz). **<sup>19</sup>F NMR** (376 MHz, CDCl<sub>3</sub>) δ -101.7. **FT-IR** (cm<sup>-1</sup>): 1723, 1693, 1614, 1591, 1482, 1425, 1252, 1086.

The ee value was determined by the chiral UPC<sup>2</sup> analysis (Trefoil™ CEL2, CO<sub>2</sub>/MeOH = 80/20, v = 2.0 mL/min, λ = 247.4 nm, t<sub>major</sub> = 0.963 min, t<sub>minor</sub> = 1.097 min).



**(R)-2,2'-spirobi[indene]-1,1'(3H,3'H)-dione (2s)**

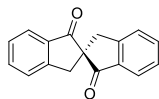

Following the above general procedure, **2s** was obtained in 90% yield (11.16 mg) with 47% ee as a white solid (m.p. = 172-173 °C).  $[\alpha]_D^{25} = 9$  (c = 1.0, CH<sub>2</sub>Cl<sub>2</sub>).

**<sup>1</sup>H NMR** (400 MHz, CDCl<sub>3</sub>) δ 7.76 (d, *J* = 7.7 Hz, 1H), 7.65 (td, *J* = 7.5, 1.2 Hz, 1H), 7.56 (d, *J* = 7.7 Hz, 1H), 7.41 (t, *J* = 7.4 Hz, 1H), 3.72 (d, *J* = 17.0 Hz, 1H), 3.19 (d, *J* = 16.9 Hz, 1H). **<sup>13</sup>C NMR** (101 MHz, CDCl<sub>3</sub>) δ 202.6, 153.8, 135.4, 135.2, 127.8, 126.3, 124.9, 65.3, 38.1.

The ee value was determined by the chiral UPC<sup>2</sup> analysis (Trefoil™ CEL2, CO<sub>2</sub>/MeOH = 80/20, v = 2.0 mL/min, λ = 246.2 nm, t<sub>major</sub> = 1.253 min, t<sub>minor</sub> = 1.328 min).

**(R)-6-methyl-2,2'-spirobi[indene]-1,1'(3H,3'H)-dione (2t)**

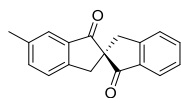

Following the above general procedure, **2t** was obtained in 95% yield (12.45 mg) with 76% ee as a white solid (m.p. = 176-178 °C).  $[\alpha]_D^{25} = 6$  (c = 1.0, CH<sub>2</sub>Cl<sub>2</sub>).

**<sup>1</sup>H NMR** (400 MHz, CDCl<sub>3</sub>) δ 7.75 (d, *J* = 7.6 Hz, 1H), 7.64 (td, *J* = 7.5, 1.2 Hz, 1H), 7.56-7.54 (m, 2H), 7.48-7.38 (m, 3H), 3.69 (dd, *J* = 21.3, 16.9 Hz, 2H), 3.16 (t, *J* = 17.2 Hz, 2H), 2.41 (s, 3H). **<sup>13</sup>C NMR** (101 MHz, CDCl<sub>3</sub>) δ 202.8, 202.7, 153.8, 151.2, 137.8, 136.5, 135.6, 135.5, 135.2, 127.7, 126.3, 126.0, 124.8, 124.8, 65.7, 38.0, 37.8, 21.0.

The ee value was determined by the chiral UPC<sup>2</sup> analysis (CHIRALPAK® AD-3, CO<sub>2</sub>/MeOH = 80/20, v = 2.0 mL/min, λ = 247.4 nm, t<sub>major</sub> = 1.587 min, t<sub>minor</sub> = 1.774 min).

## 7. X-ray crystallographic information

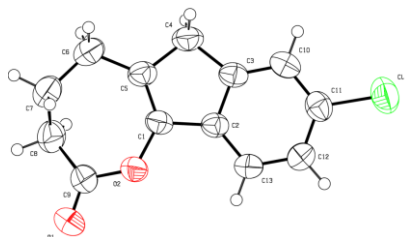

Table S2. Crystal data and structure refinement for compound 1a. (CCDC : 2099870)

|                                             |                                                               |
|---------------------------------------------|---------------------------------------------------------------|
| Empirical formula                           | C <sub>13</sub> H <sub>11</sub> ClO <sub>2</sub>              |
| Temperature/K                               | 292.69(10)                                                    |
| Crystal system                              | monoclinic                                                    |
| Space group                                 | P21/n                                                         |
| a/Å                                         | 13.6872(8)                                                    |
| b/Å                                         | 6.0620(3)                                                     |
| c/Å                                         | 14.0247(9)                                                    |
| $\alpha$ /°                                 | 90                                                            |
| $\beta$ /°                                  | 105.577(7)                                                    |
| $\gamma$ /°                                 | 90                                                            |
| Volume/Å <sup>3</sup>                       | 1120.91(12)                                                   |
| Z                                           | 4                                                             |
| $\rho$ calc/cm <sup>3</sup>                 | 1.391                                                         |
| $\mu$ /mm <sup>-1</sup>                     | 2.863                                                         |
| F(000)                                      | 488.0                                                         |
| Crystal size/mm <sup>3</sup>                | 0.1 × 0.05 × 0.04                                             |
| Radiation                                   | Cu K $\alpha$ ( $\lambda$ = 1.54184)                          |
| 2 $\theta$ range for data collection/°      | 8.014 to 133.2                                                |
| Index ranges                                | -12 ≤ h ≤ 16, -7 ≤ k ≤ 5, -15 ≤ l ≤ 16                        |
| Reflections collected                       | 3650                                                          |
| Independent reflections                     | 1975 [R <sub>int</sub> = 0.0217, R <sub>sigma</sub> = 0.0316] |
| Data/restraints/parameters                  | 1975/0/145                                                    |
| Goodness-of-fit on F <sup>2</sup>           | 1.026                                                         |
| Final R indexes [I >= 2 $\sigma$ (I)]       | R <sub>1</sub> = 0.0460, wR <sub>2</sub> = 0.1158             |
| Final R indexes [all data]                  | R <sub>1</sub> = 0.0624, wR <sub>2</sub> = 0.1323             |
| Largest diff. peak/hole / e Å <sup>-3</sup> | 0.16/-0.24                                                    |

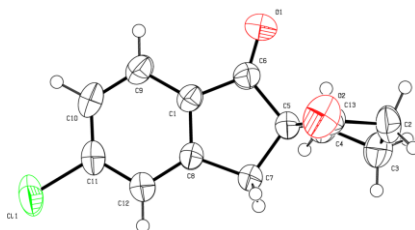

**Table S3. Crystal data and structure refinement for compound 2a. (CCDC : 2092879)**

|                                             |                                                               |
|---------------------------------------------|---------------------------------------------------------------|
| Empirical formula                           | C <sub>13</sub> H <sub>11</sub> ClO <sub>2</sub>              |
| Formula weight                              | 234.67                                                        |
| Temperature/K                               | 293.0(7)                                                      |
| Crystal system                              | orthorhombic                                                  |
| Space group                                 | P212121                                                       |
| a/Å                                         | 6.90260(14)                                                   |
| b/Å                                         | 6.93126(15)                                                   |
| c/Å                                         | 23.3243(4)                                                    |
| $\alpha$ /°                                 | 90                                                            |
| $\beta$ /°                                  | 90                                                            |
| $\gamma$ /°                                 | 90                                                            |
| Volume/Å <sup>3</sup>                       | 1115.92(4)                                                    |
| Z                                           | 4                                                             |
| $\rho$ calc/cm <sup>3</sup>                 | 1.397                                                         |
| $\mu$ /mm <sup>-1</sup>                     | 2.876                                                         |
| F(000)                                      | 488.0                                                         |
| Crystal size/mm <sup>3</sup>                | 0.11 × 0.08 × 0.05                                            |
| Radiation                                   | Cu K $\alpha$ ( $\lambda$ = 1.54184)                          |
| 2 $\theta$ range for data collection/°      | 7.58 to 152.36                                                |
| Index ranges                                | -8 ≤ h ≤ 8, -5 ≤ k ≤ 8, -28 ≤ l ≤ 29                          |
| Reflections collected                       | 8732                                                          |
| Independent reflections                     | 2262 [R <sub>int</sub> = 0.0237, R <sub>sigma</sub> = 0.0182] |
| Data/restraints/parameters                  | 2262/0/145                                                    |
| Goodness-of-fit on F <sup>2</sup>           | 1.075                                                         |
| Final R indexes [I ≥ 2 $\sigma$ (I)]        | R <sub>1</sub> = 0.0335, wR <sub>2</sub> = 0.0862             |
| Final R indexes [all data]                  | R <sub>1</sub> = 0.0363, wR <sub>2</sub> = 0.0884             |
| Largest diff. peak/hole / e Å <sup>-3</sup> | 0.15/-0.25                                                    |
| Flack parameter                             | 0.000(8)                                                      |

## 8. NMR spectroscopic data and UPC<sup>2</sup> data

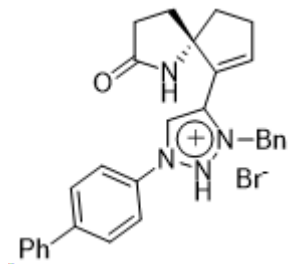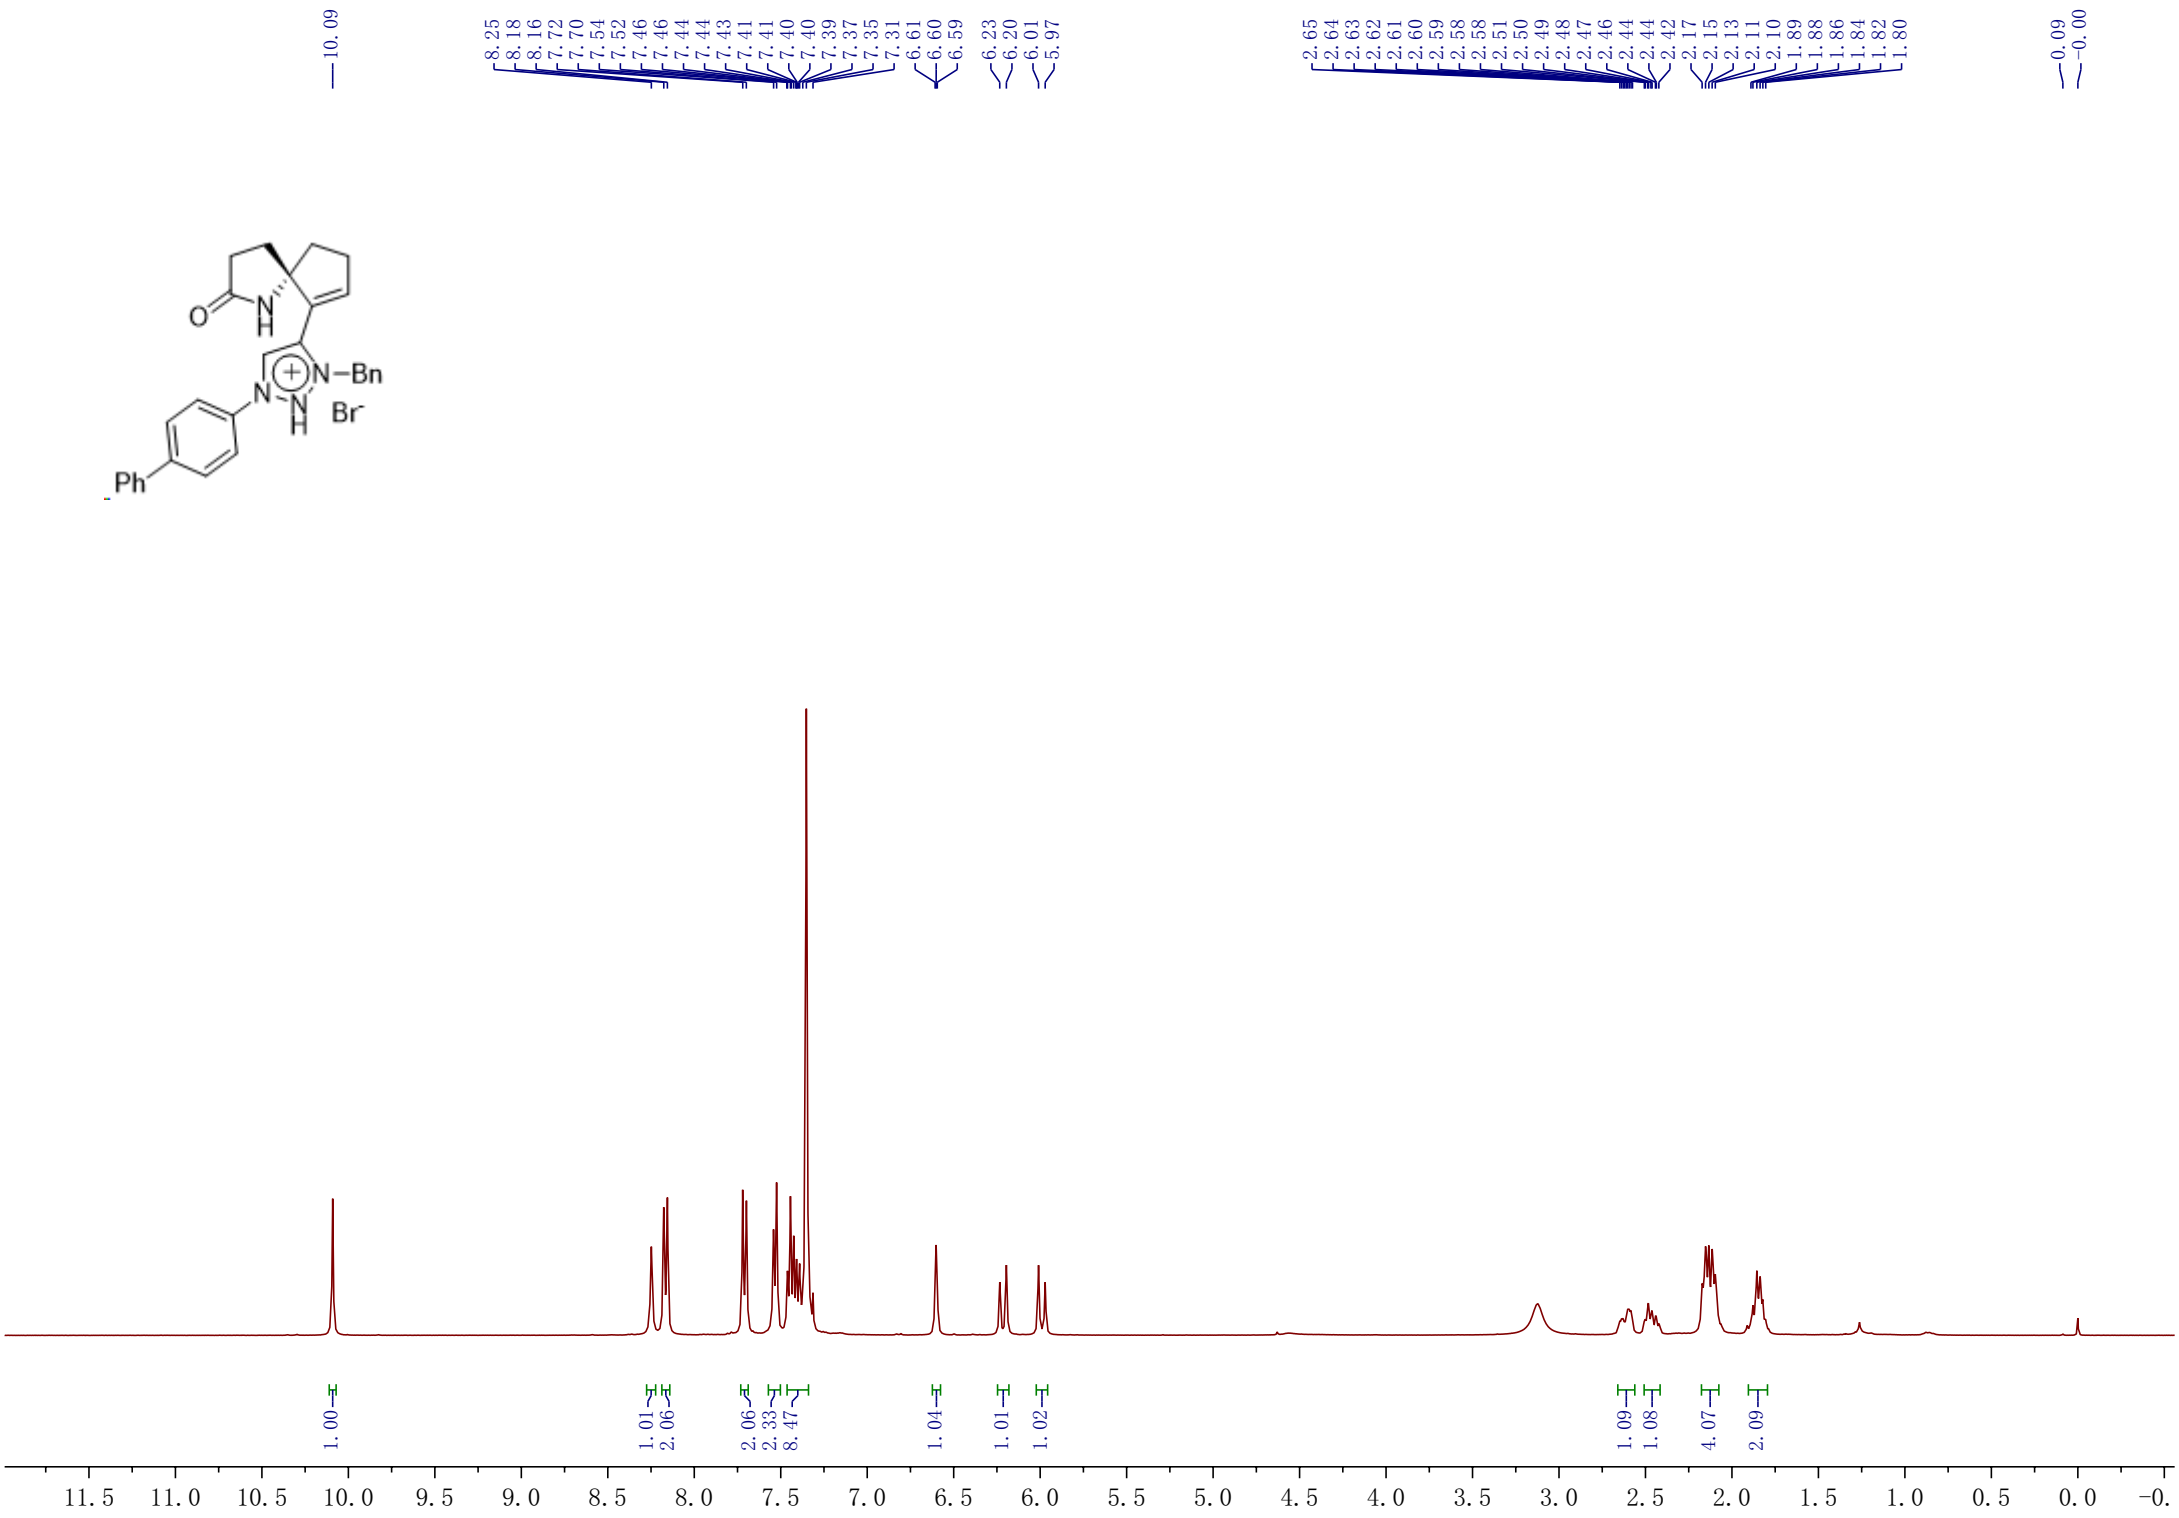

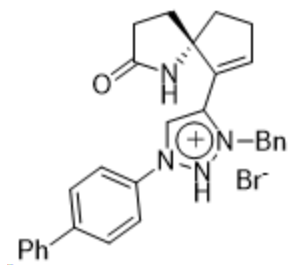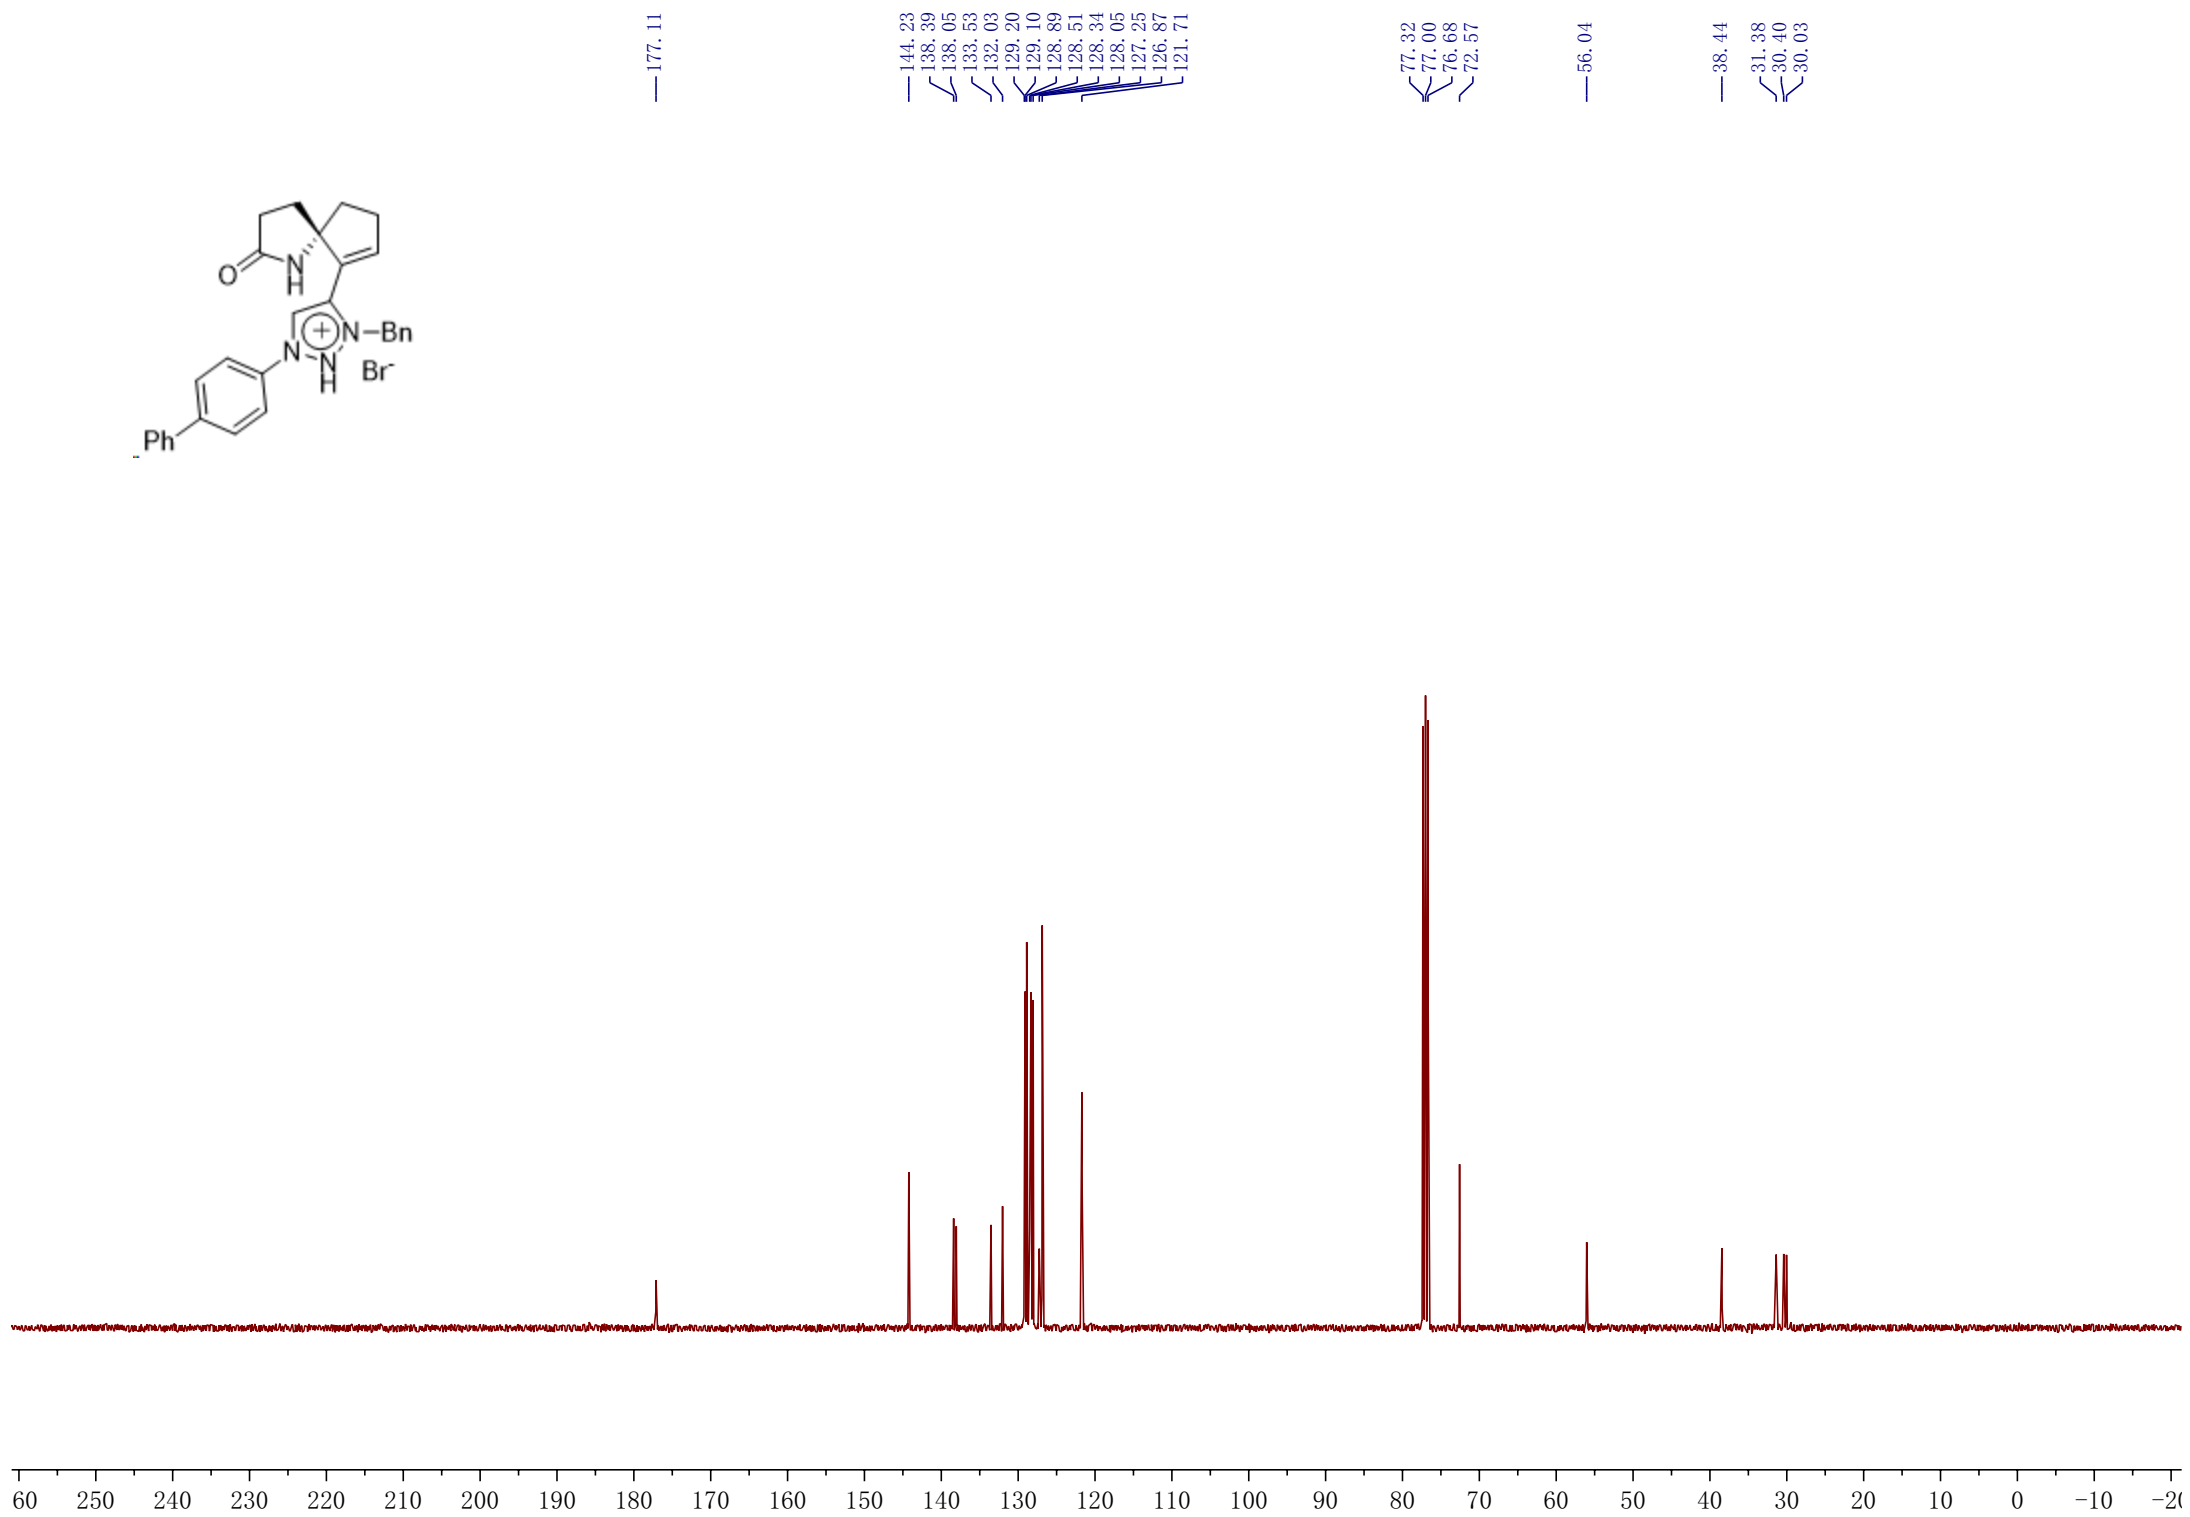

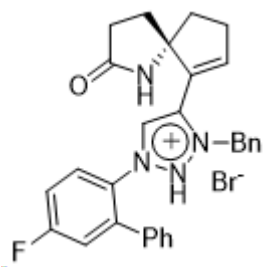

9.23  
8.10  
8.09  
8.08  
7.85  
7.39  
7.37  
7.34  
7.33  
7.31  
7.30  
7.29  
7.27  
7.26  
7.21  
7.20  
7.16  
7.15  
6.90  
6.89  
6.62

6.05  
6.03  
5.79  
5.77

2.64  
2.62  
2.60  
2.59  
2.47  
2.45  
2.44  
2.42  
2.41  
2.13  
2.12  
2.10  
2.09  
2.07  
1.92  
1.91  
1.89  
1.88  
1.71  
1.69  
1.67  
1.39  
1.37  
1.35  
1.33

0.08  
0.00

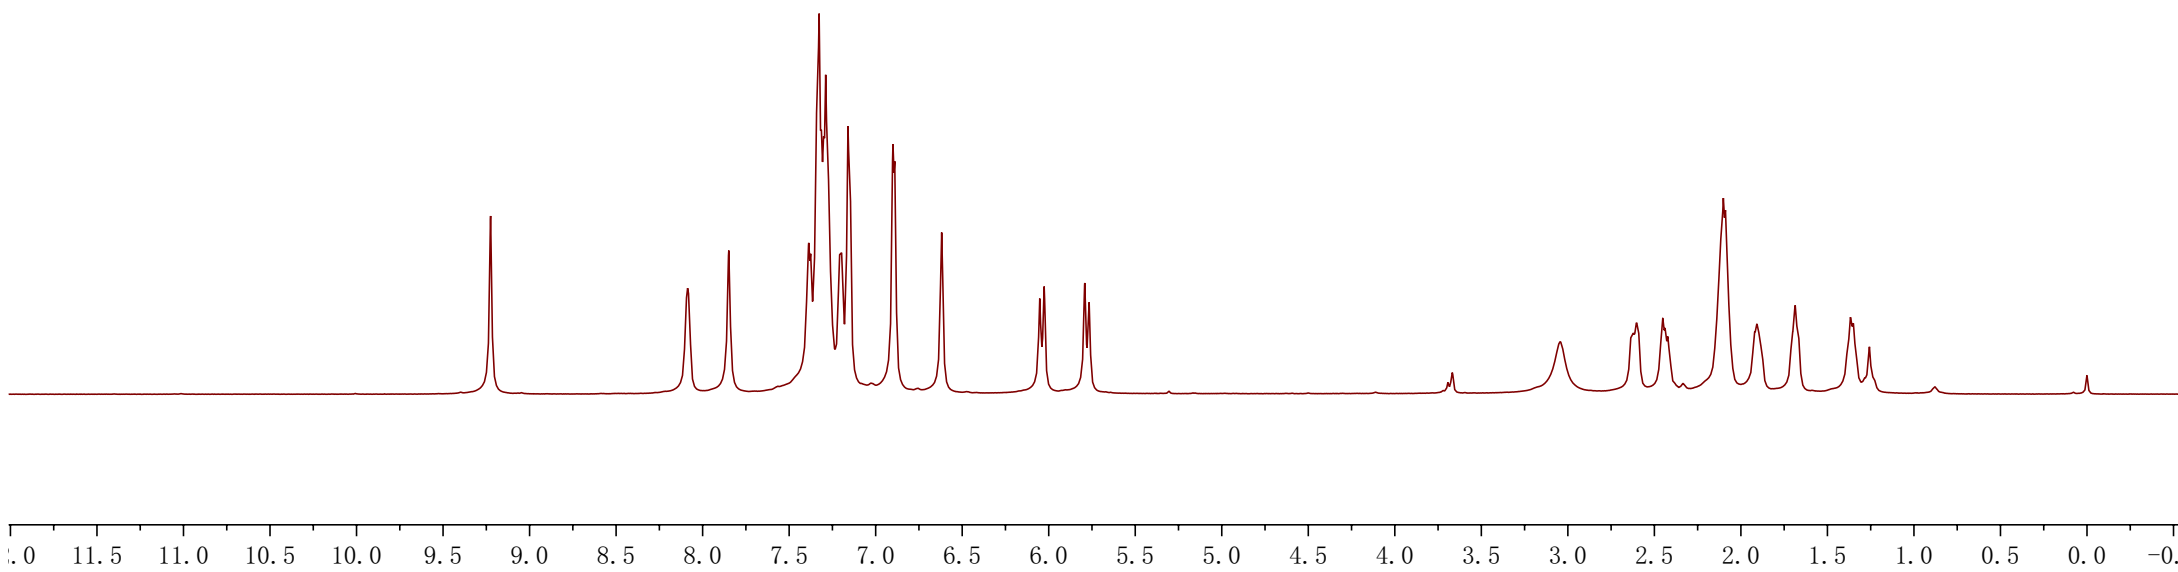

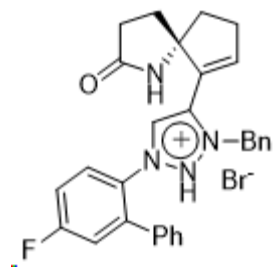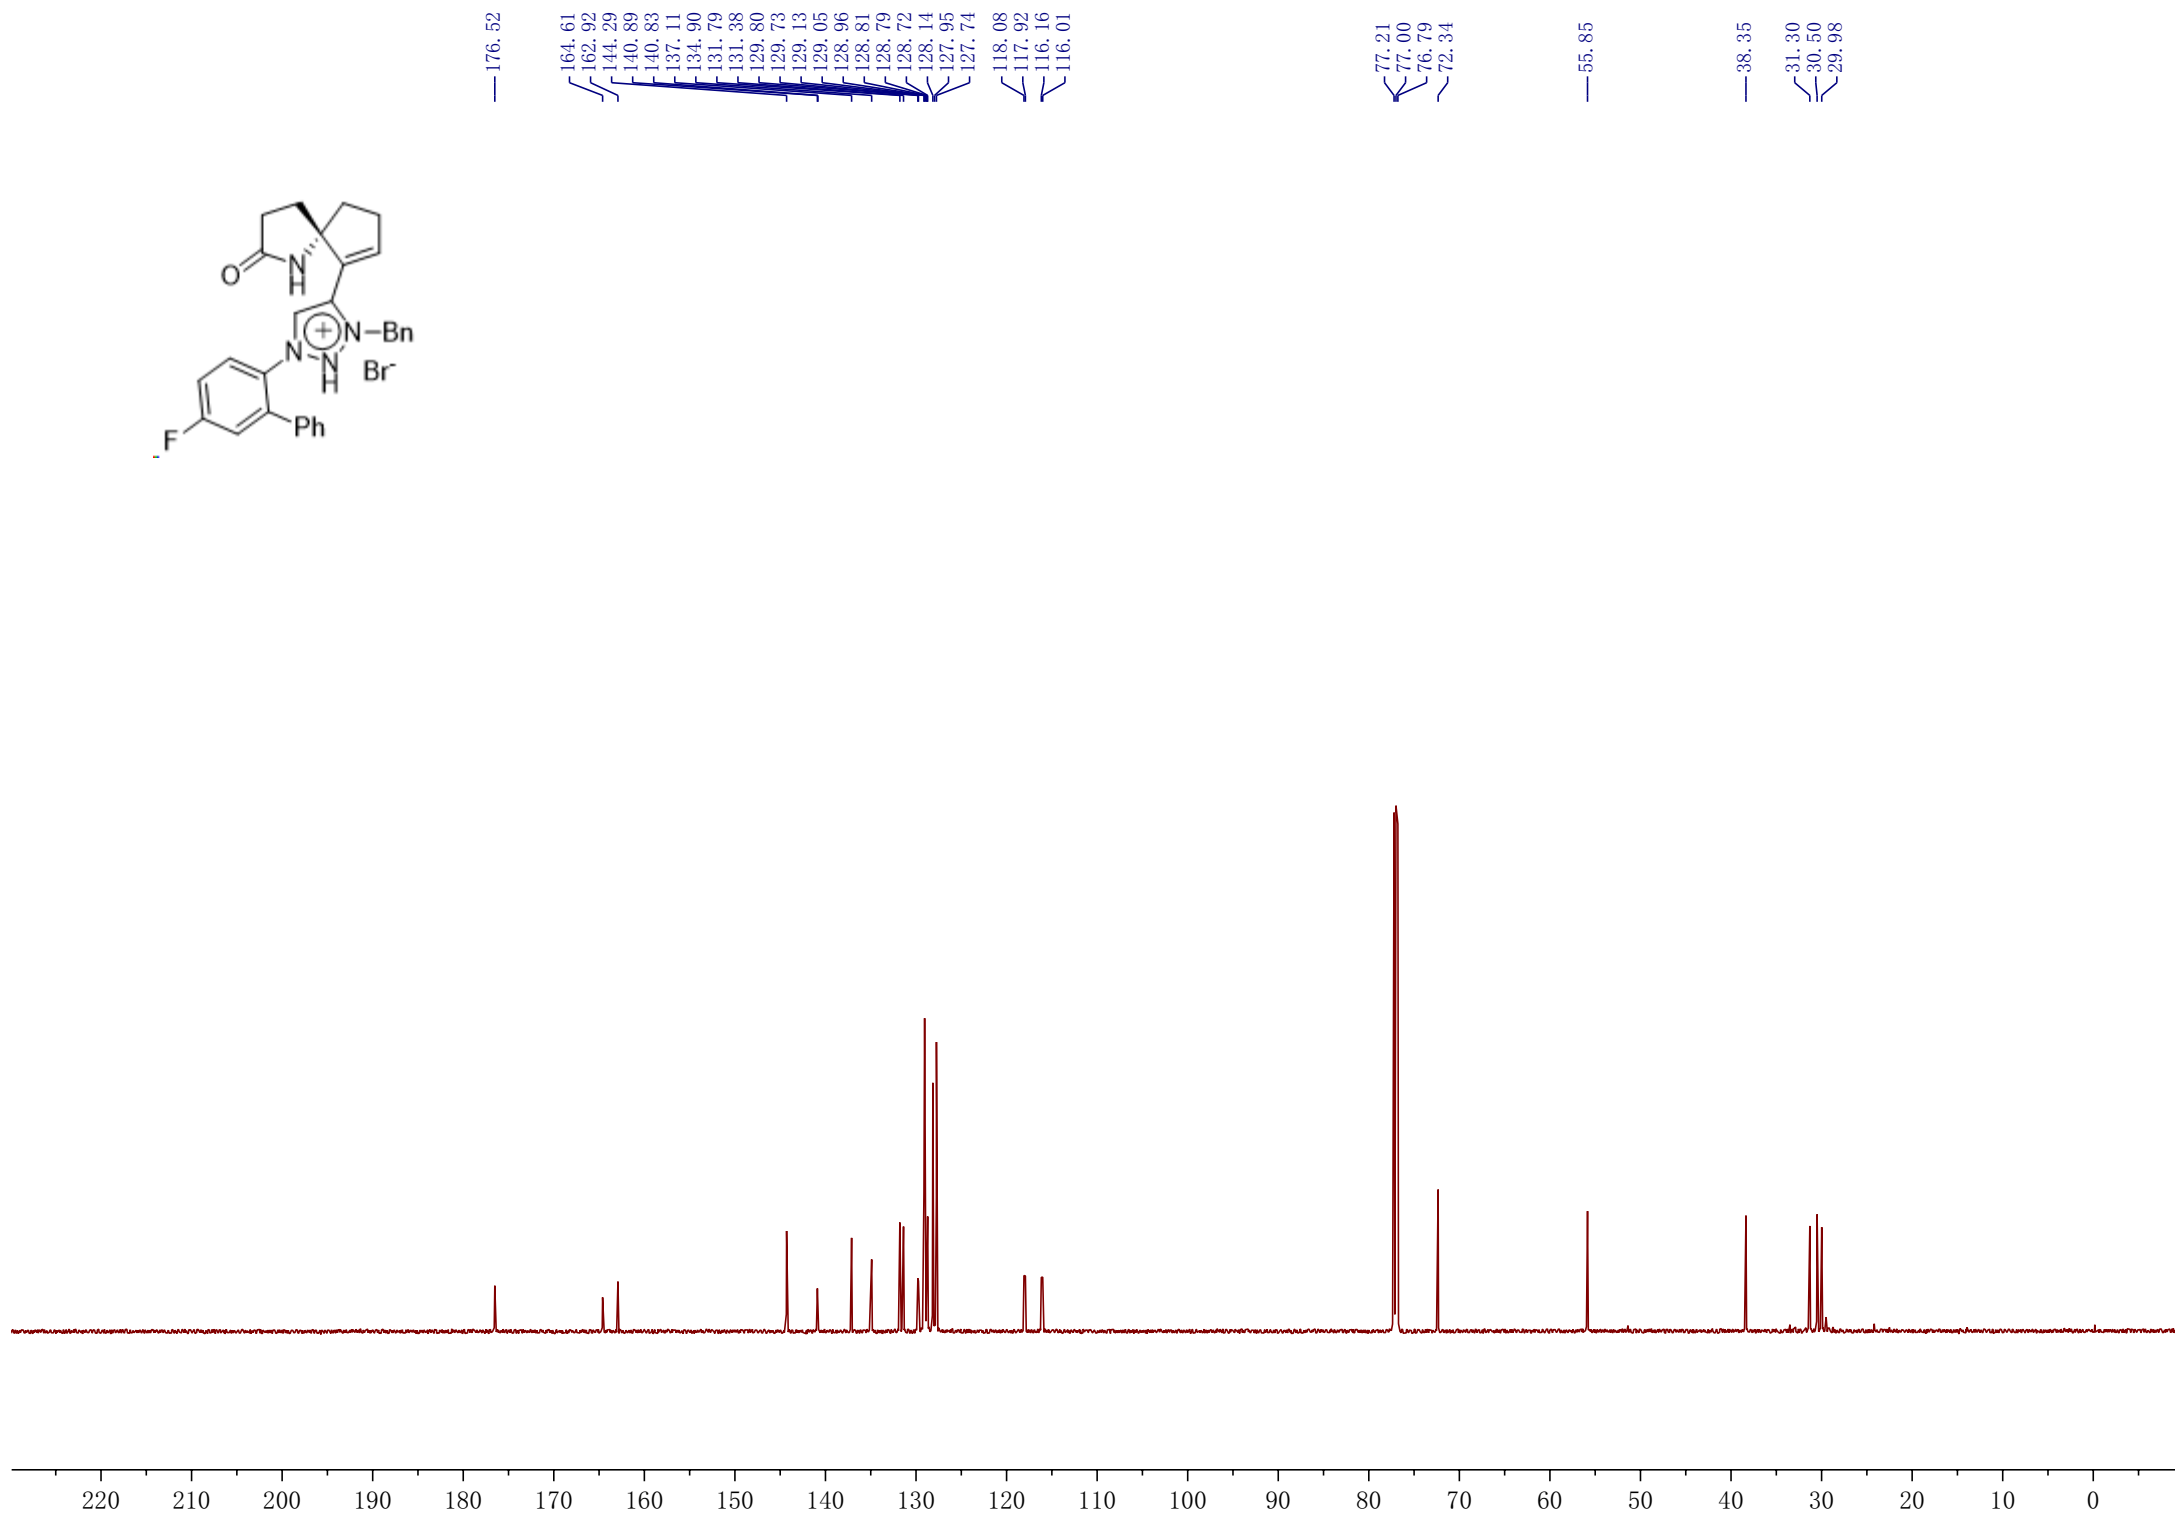

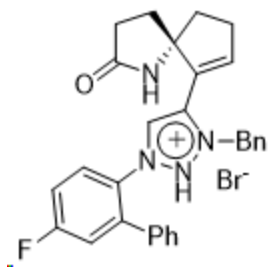

-106.07

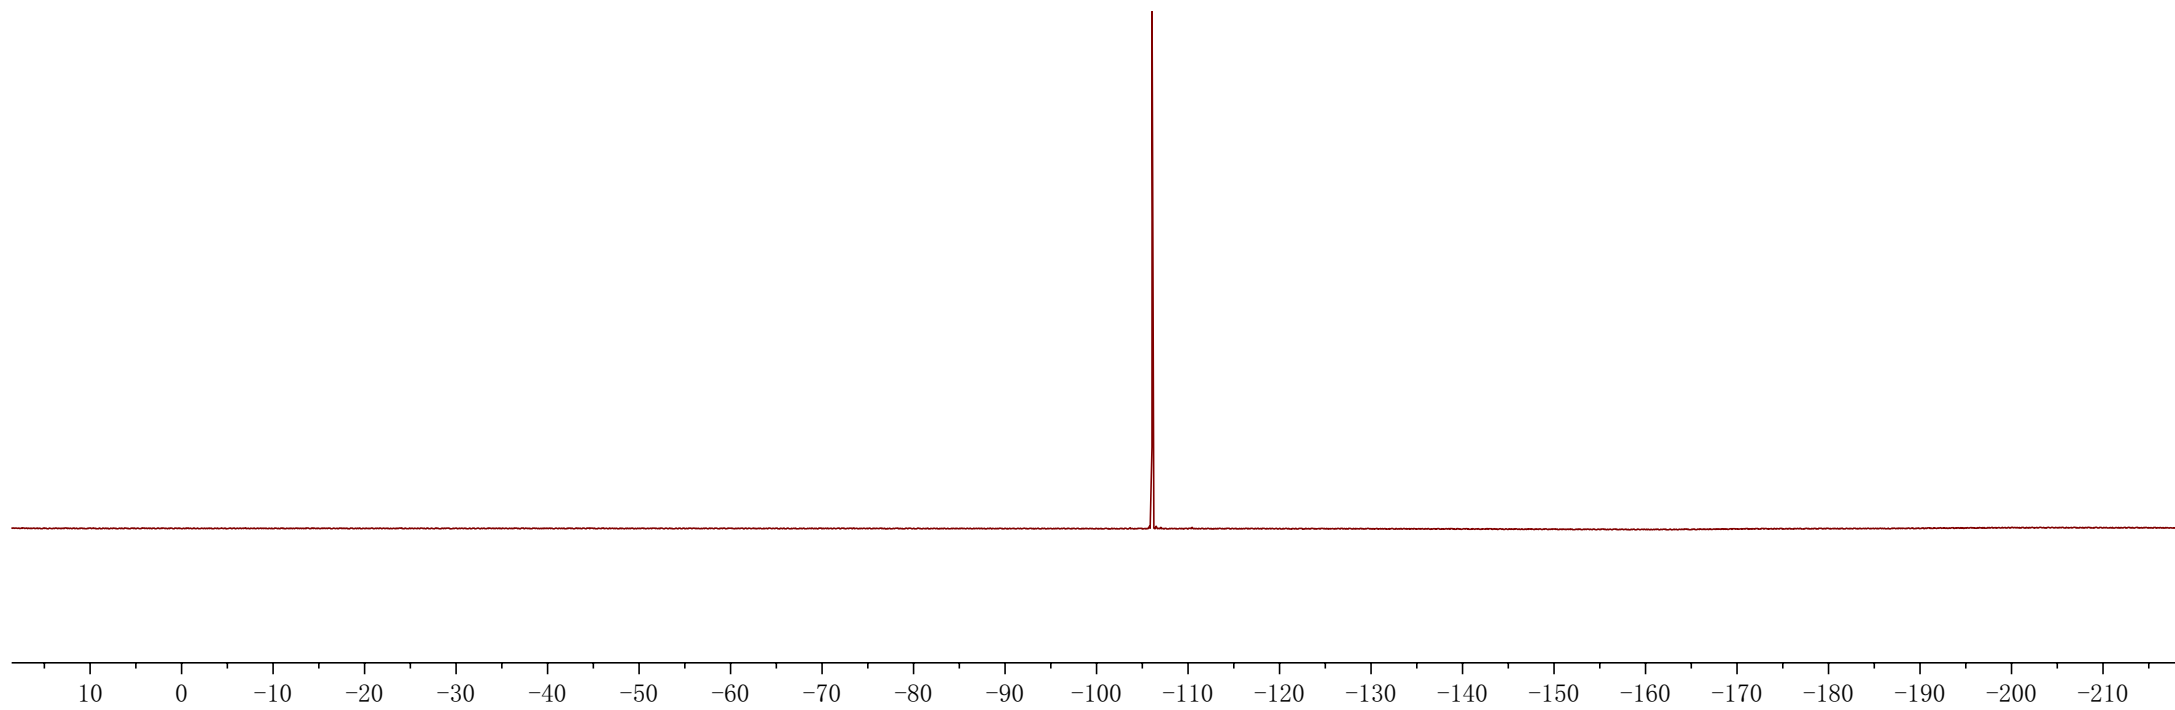



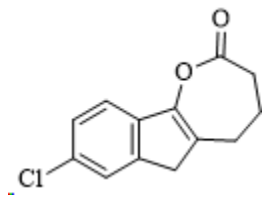

7.32  
7.32  
7.31  
7.30  
7.28  
7.28  
7.26  
7.26

3.33  
2.82  
2.82  
2.81  
2.81  
2.80  
2.79  
2.67  
2.66  
2.64  
2.16  
2.16  
2.15  
2.14  
2.14  
2.13  
2.13  
2.12  
2.12  
2.11  
2.10  
2.10

0.00

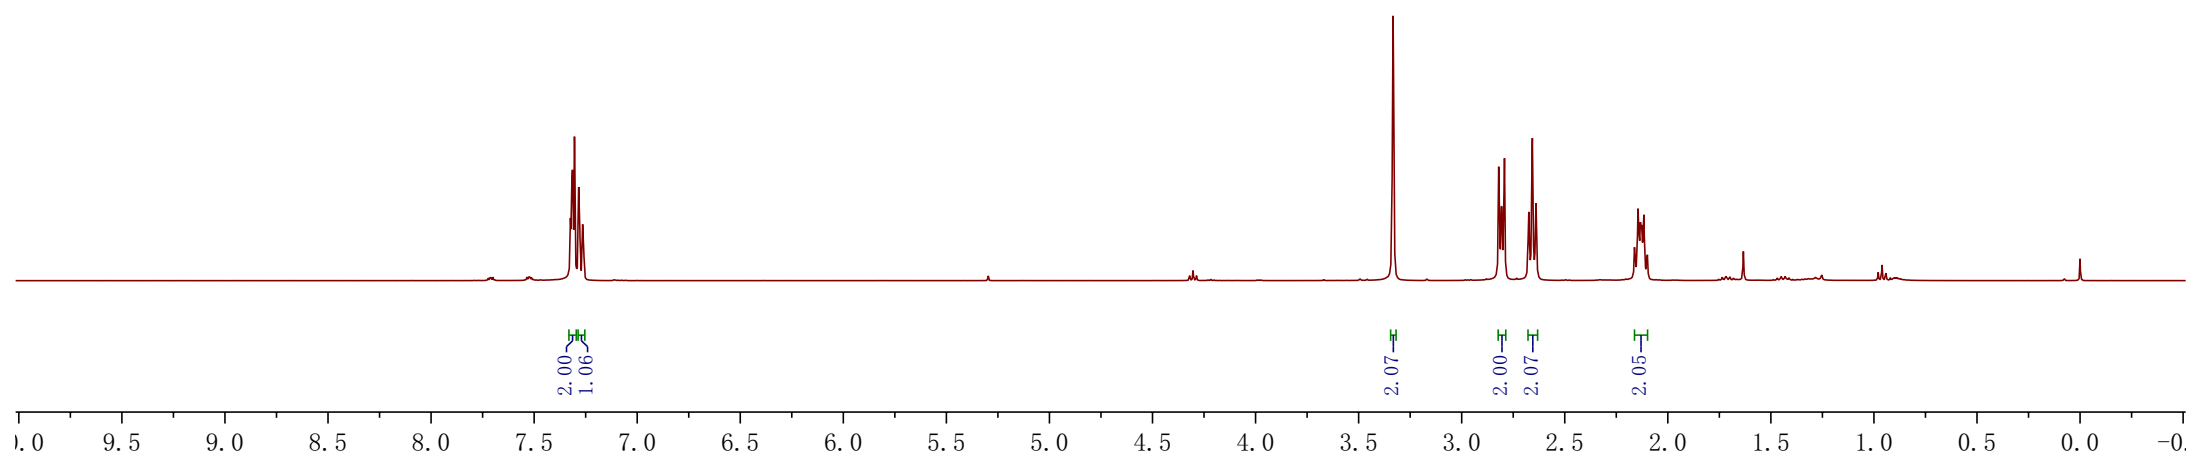

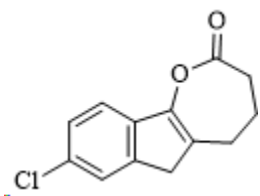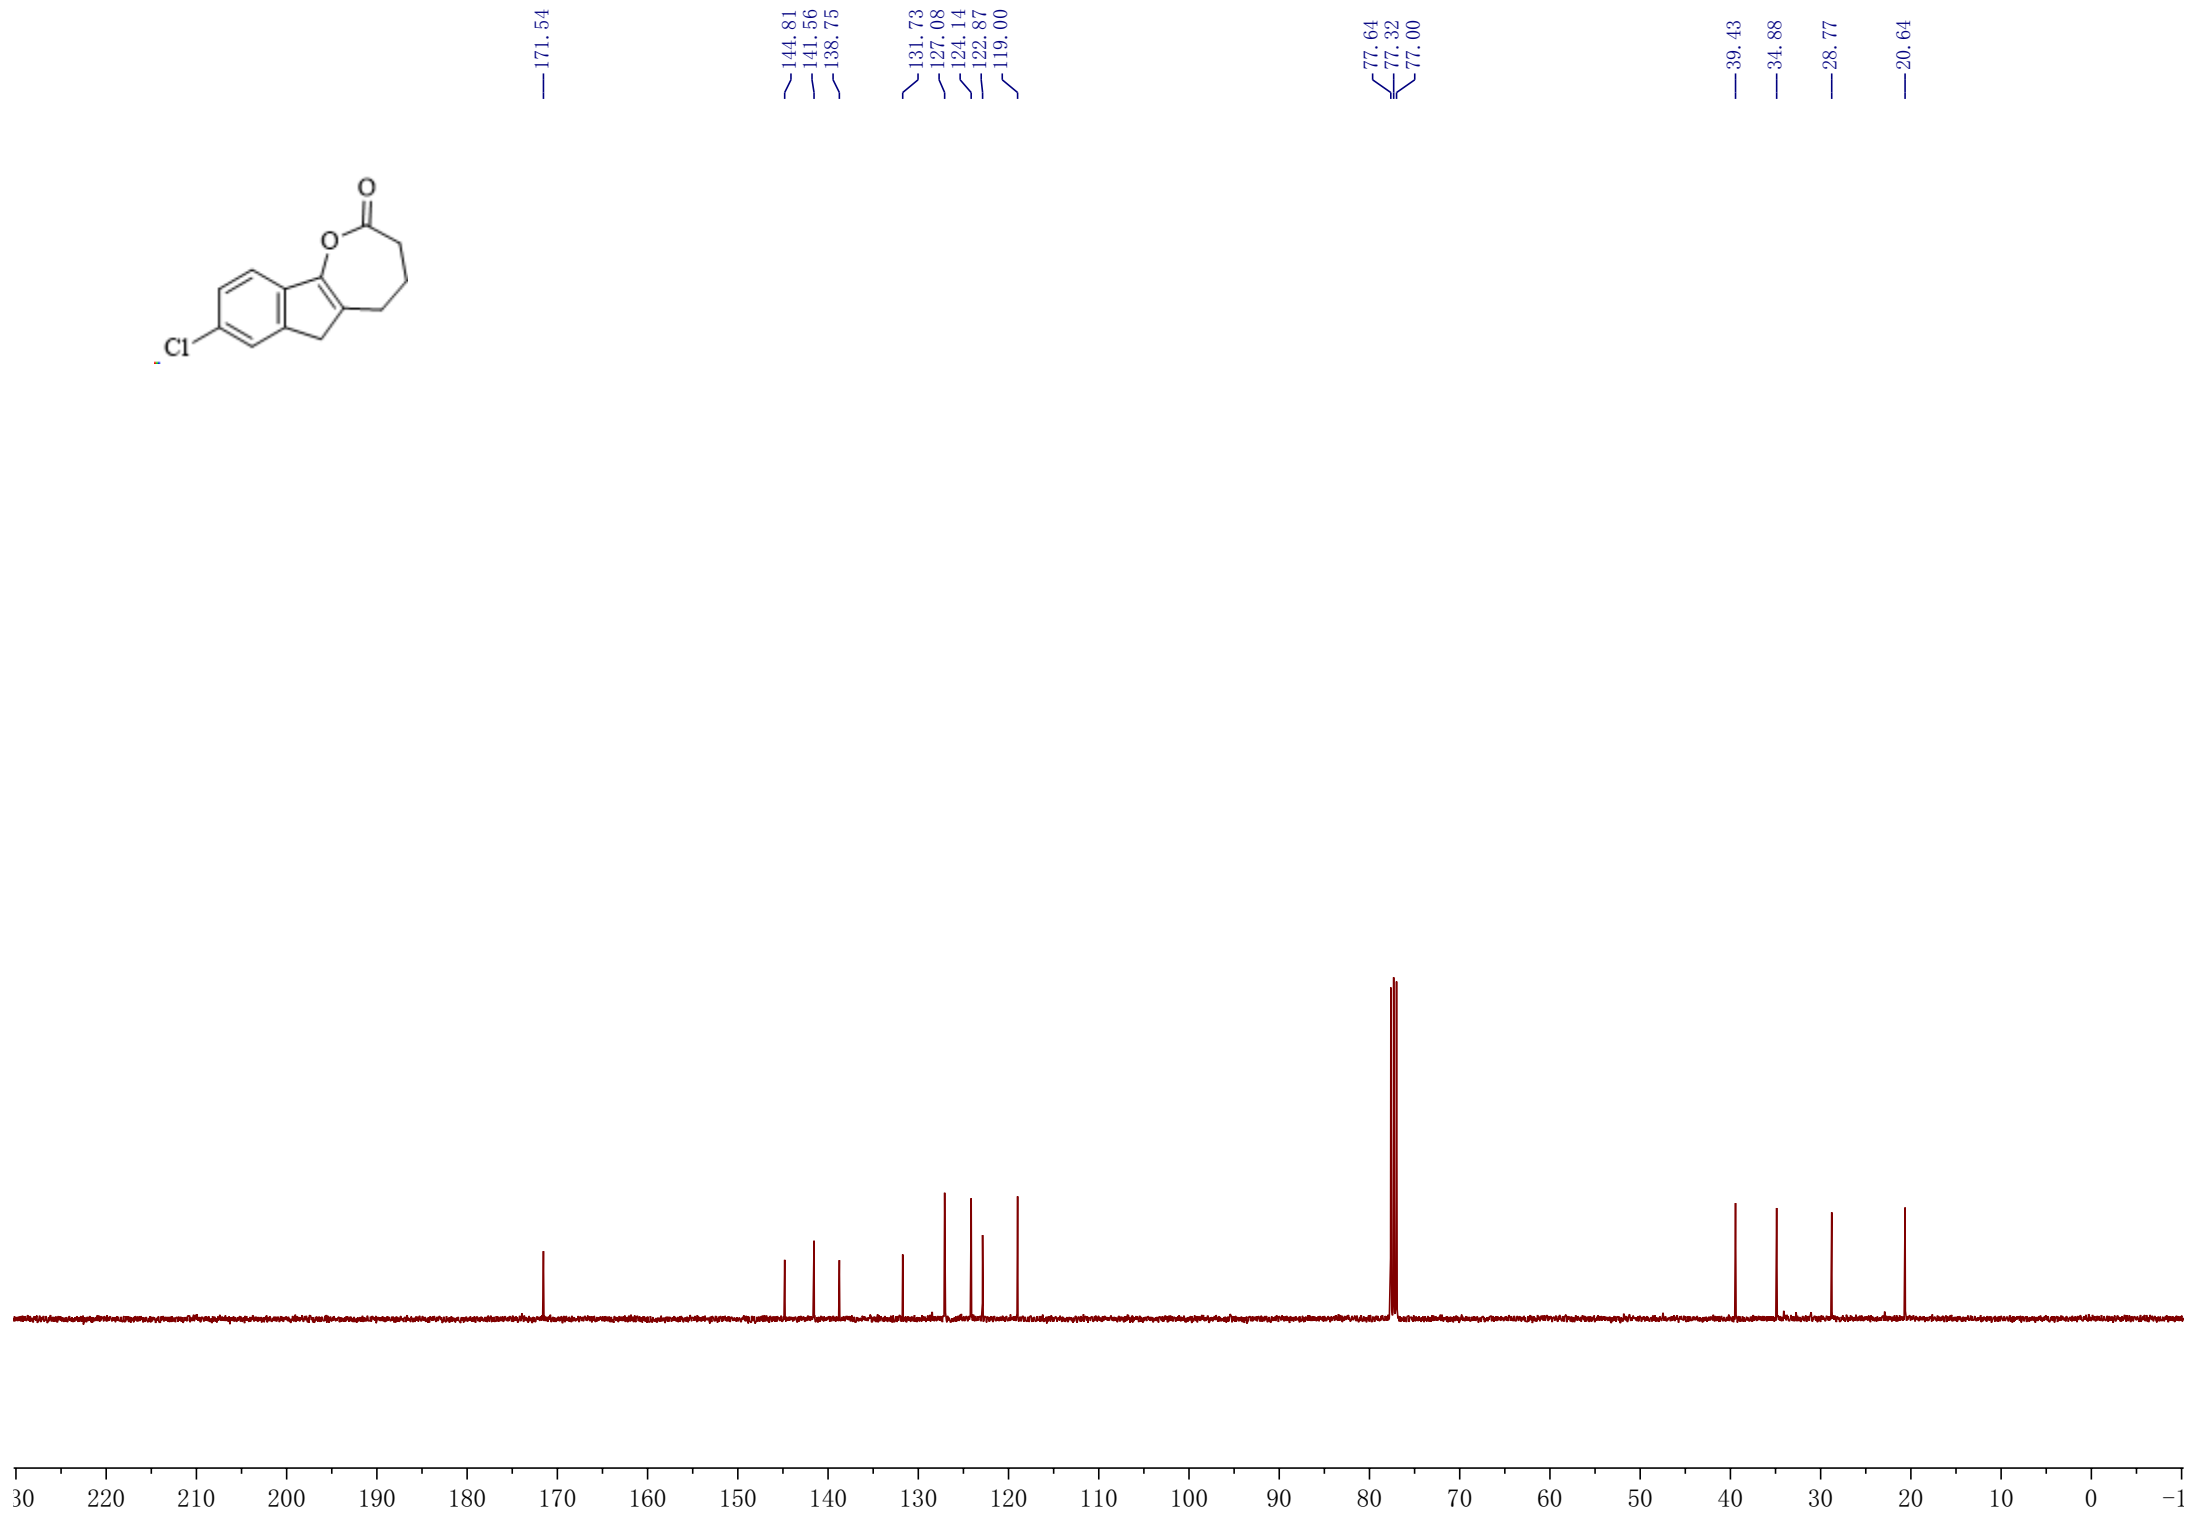

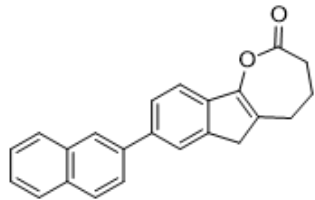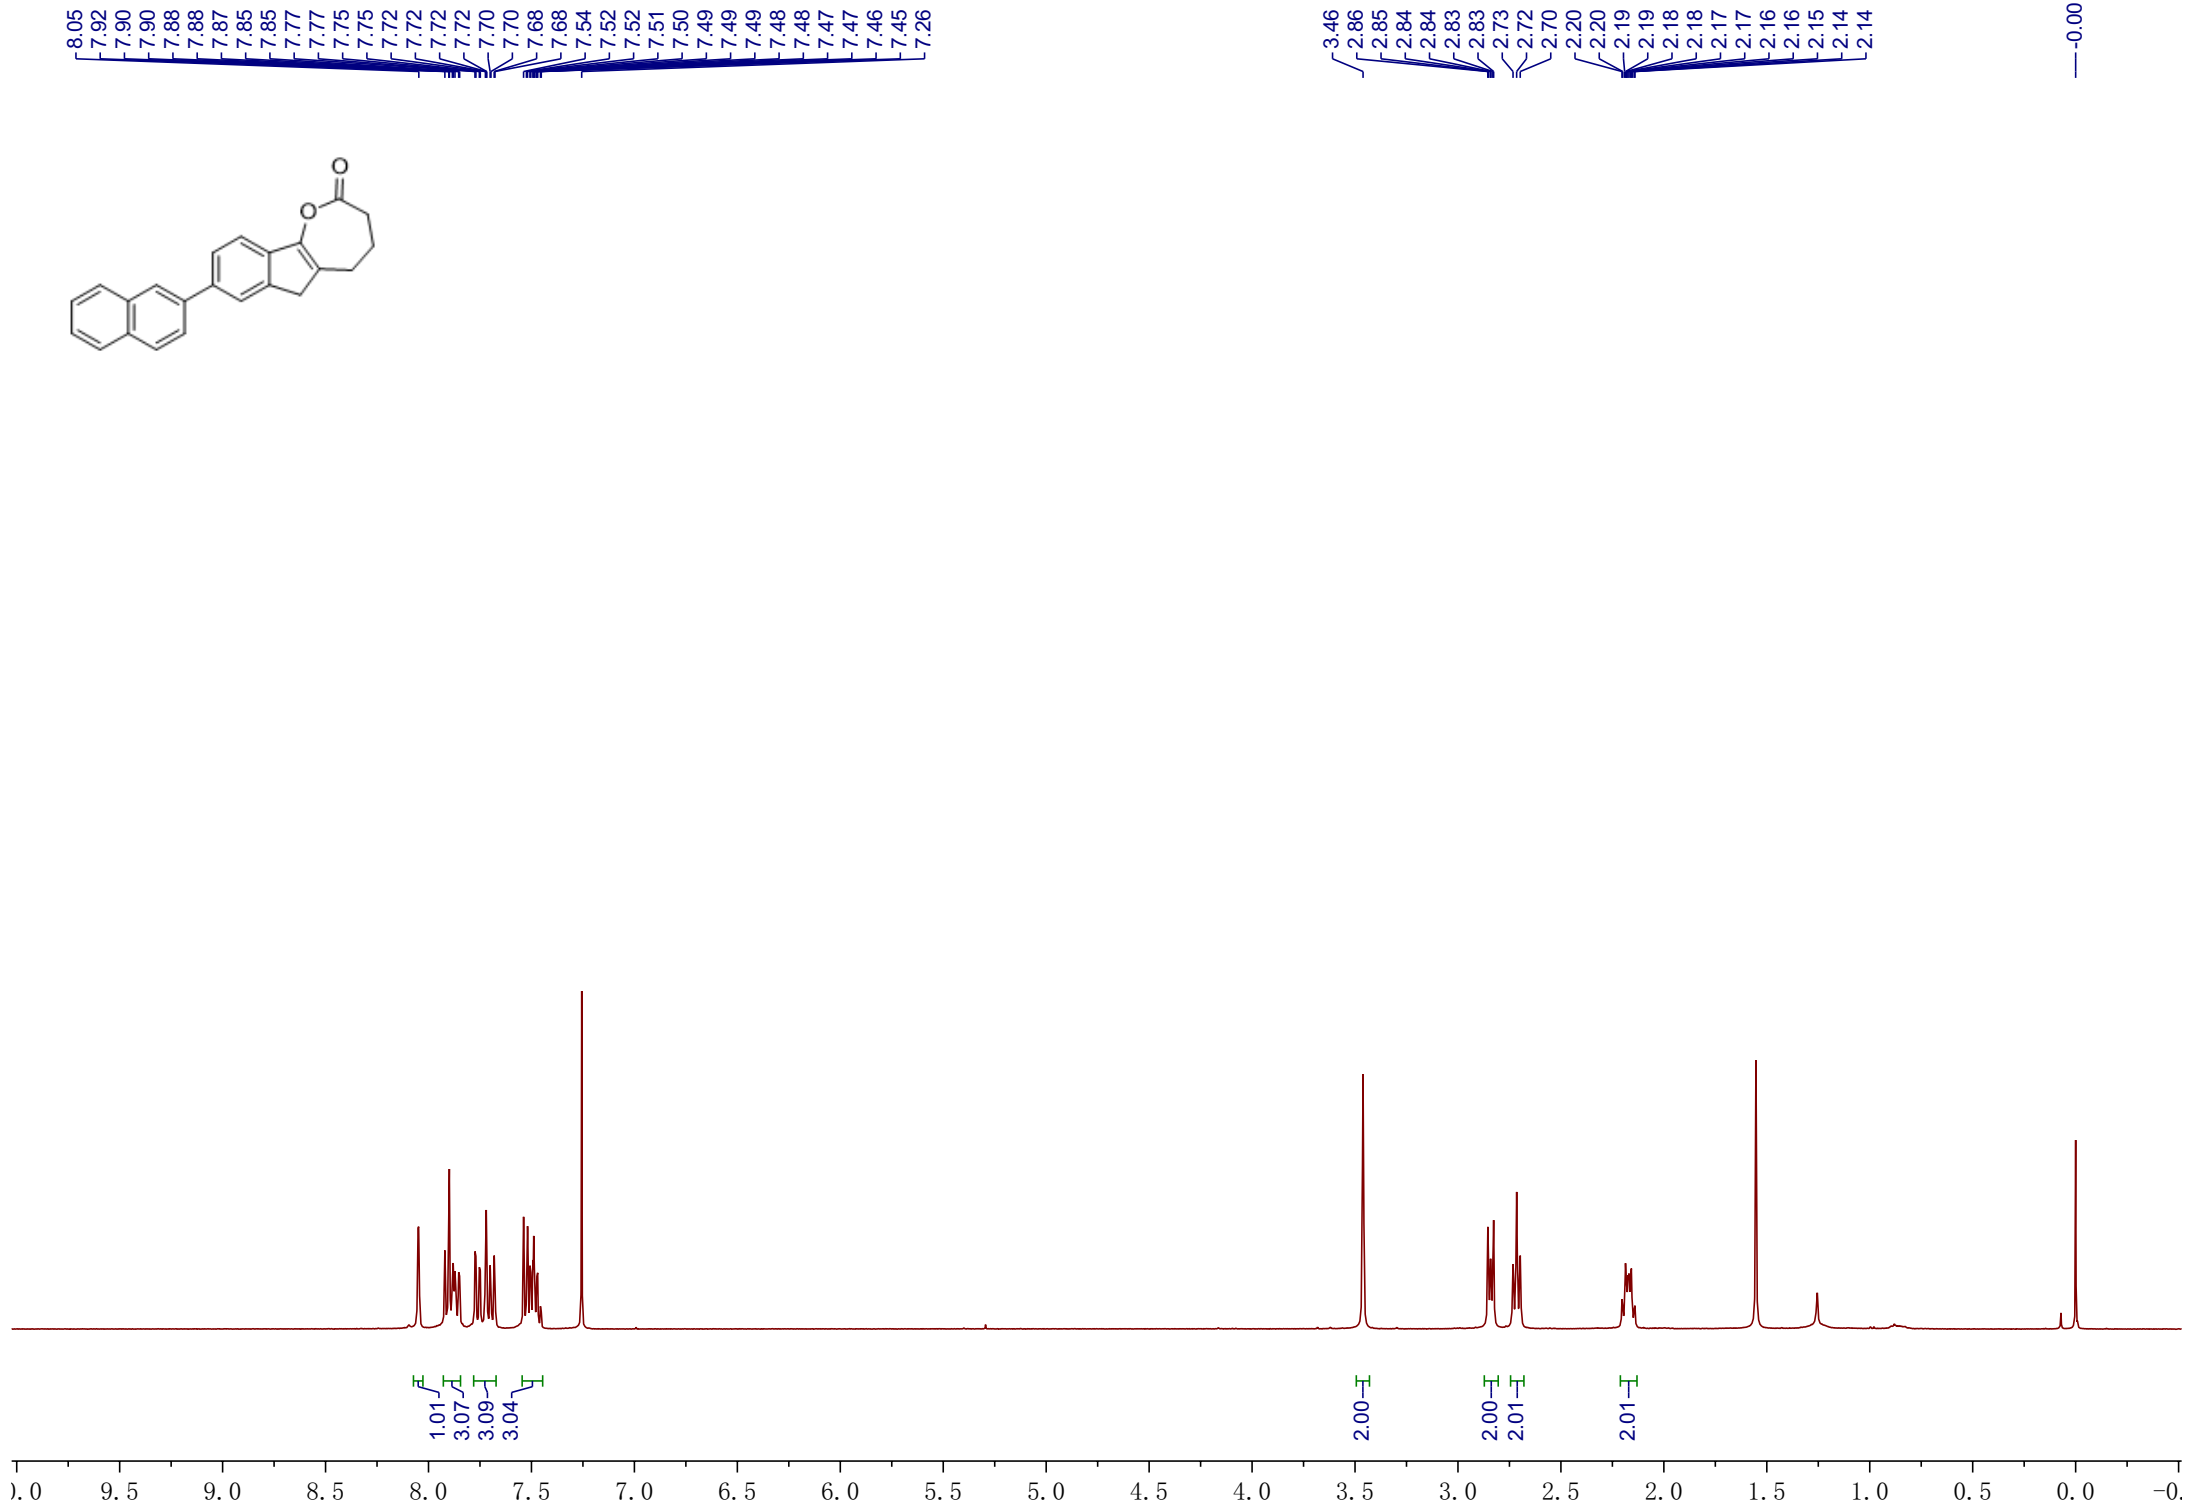

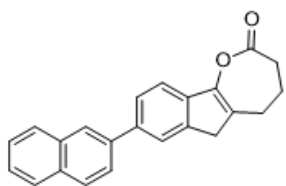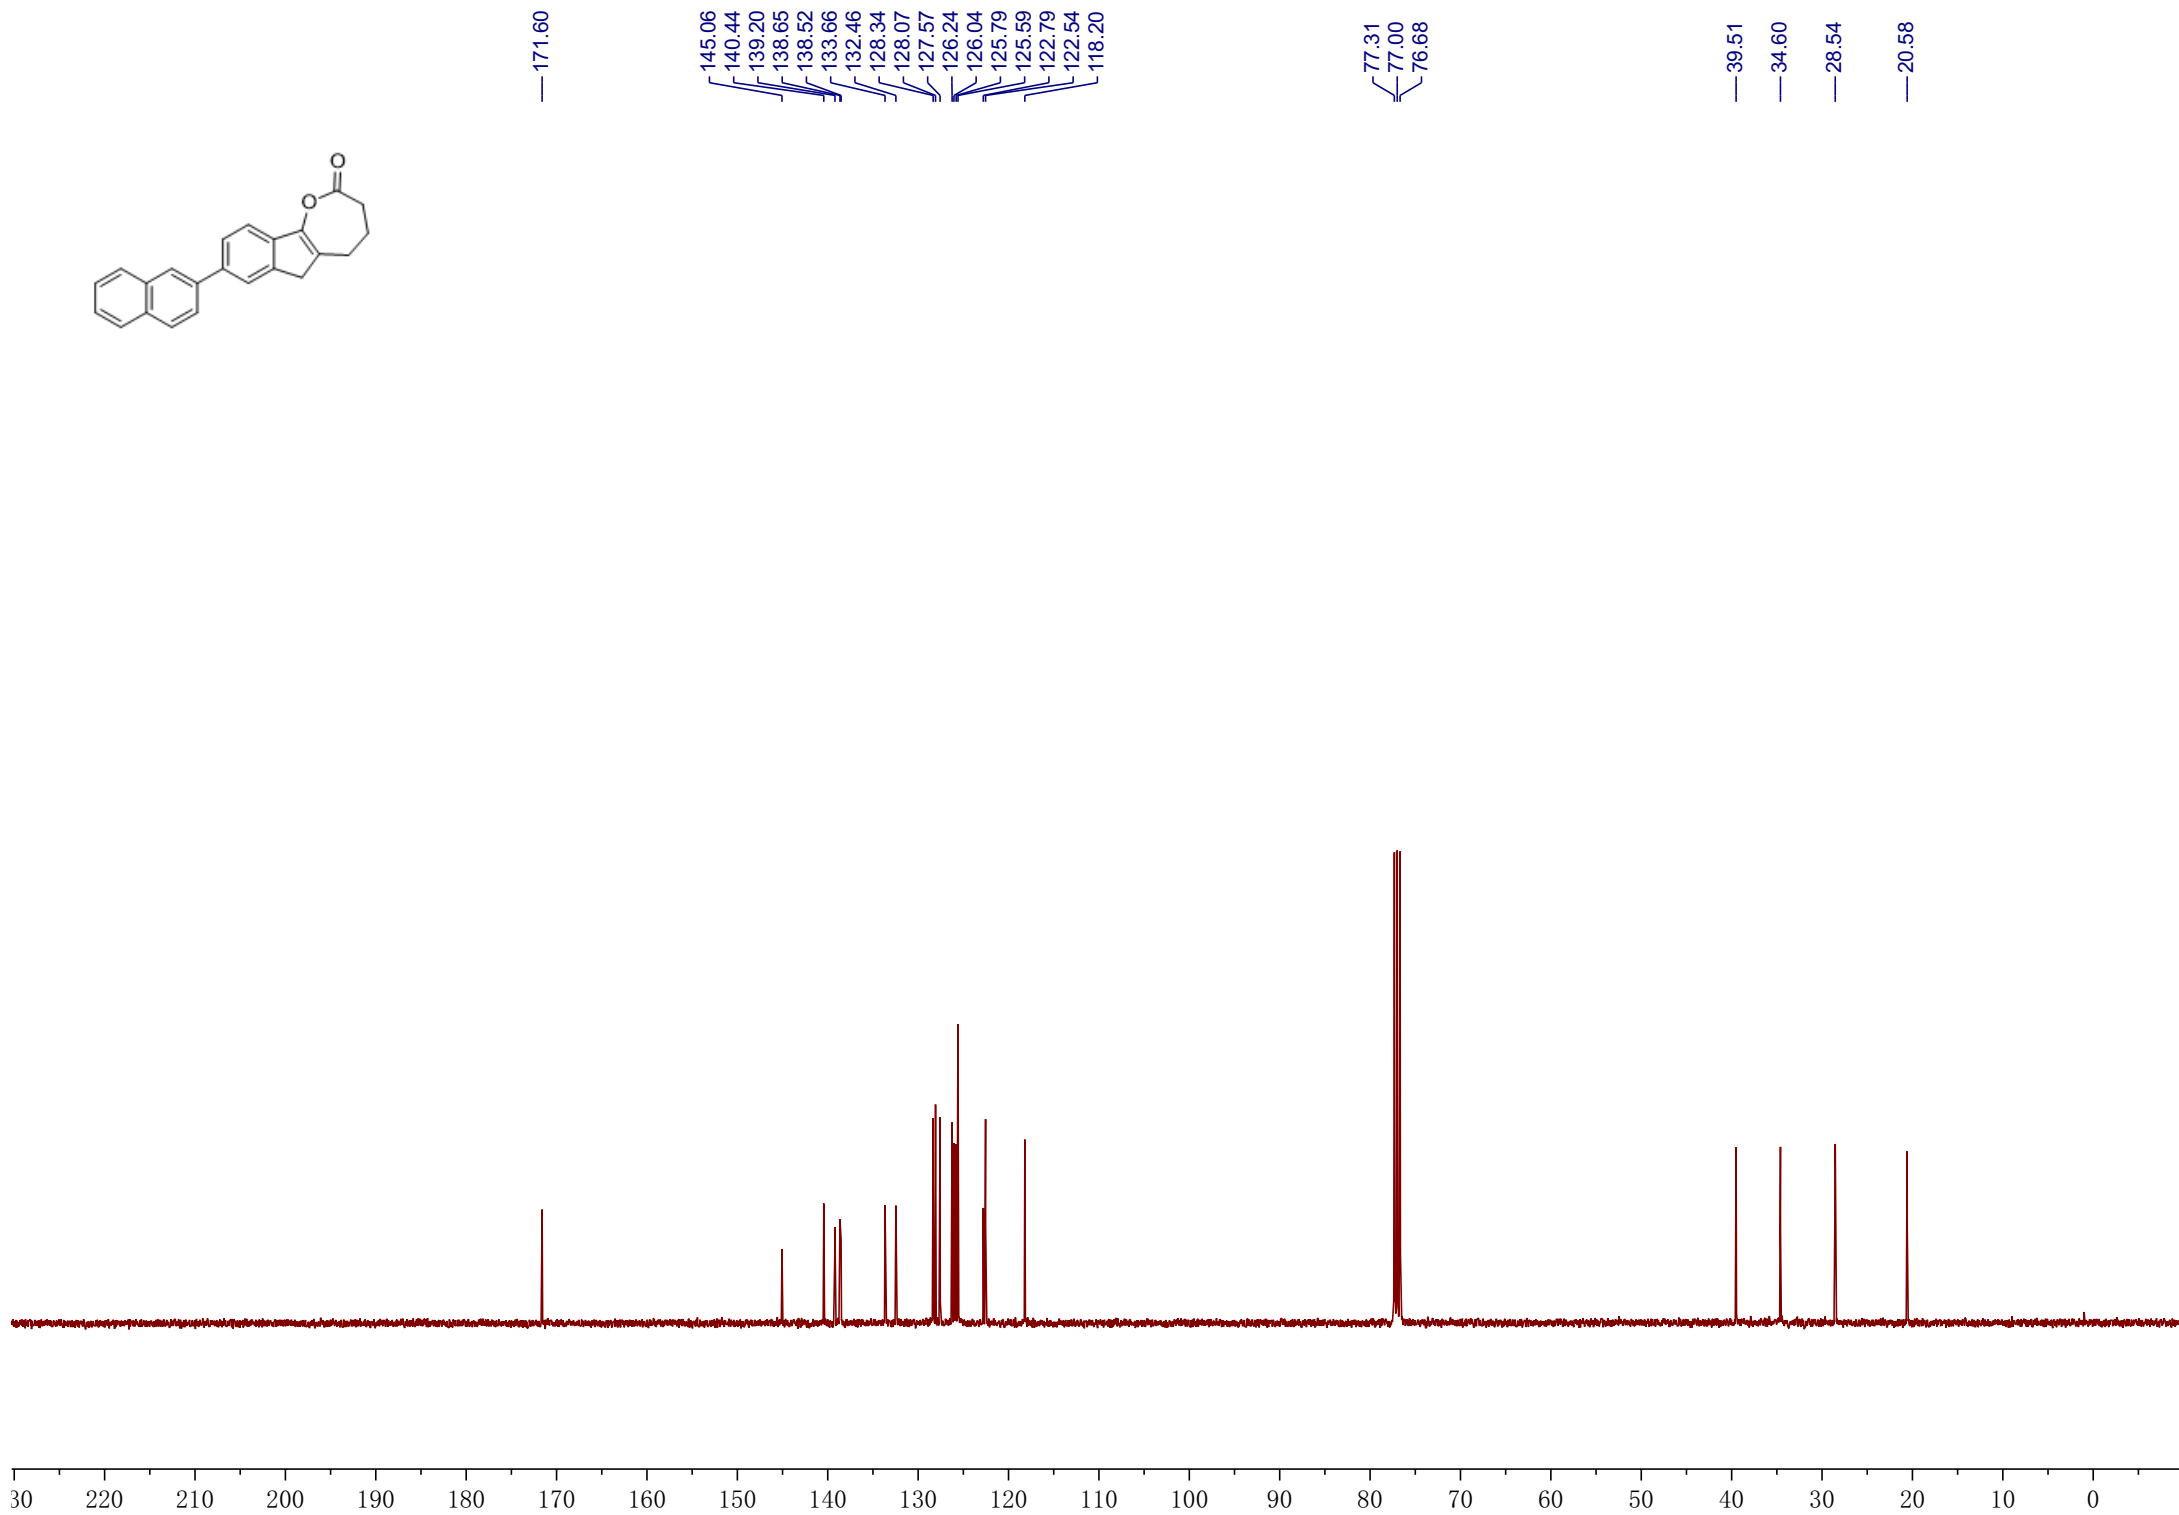

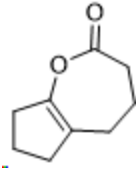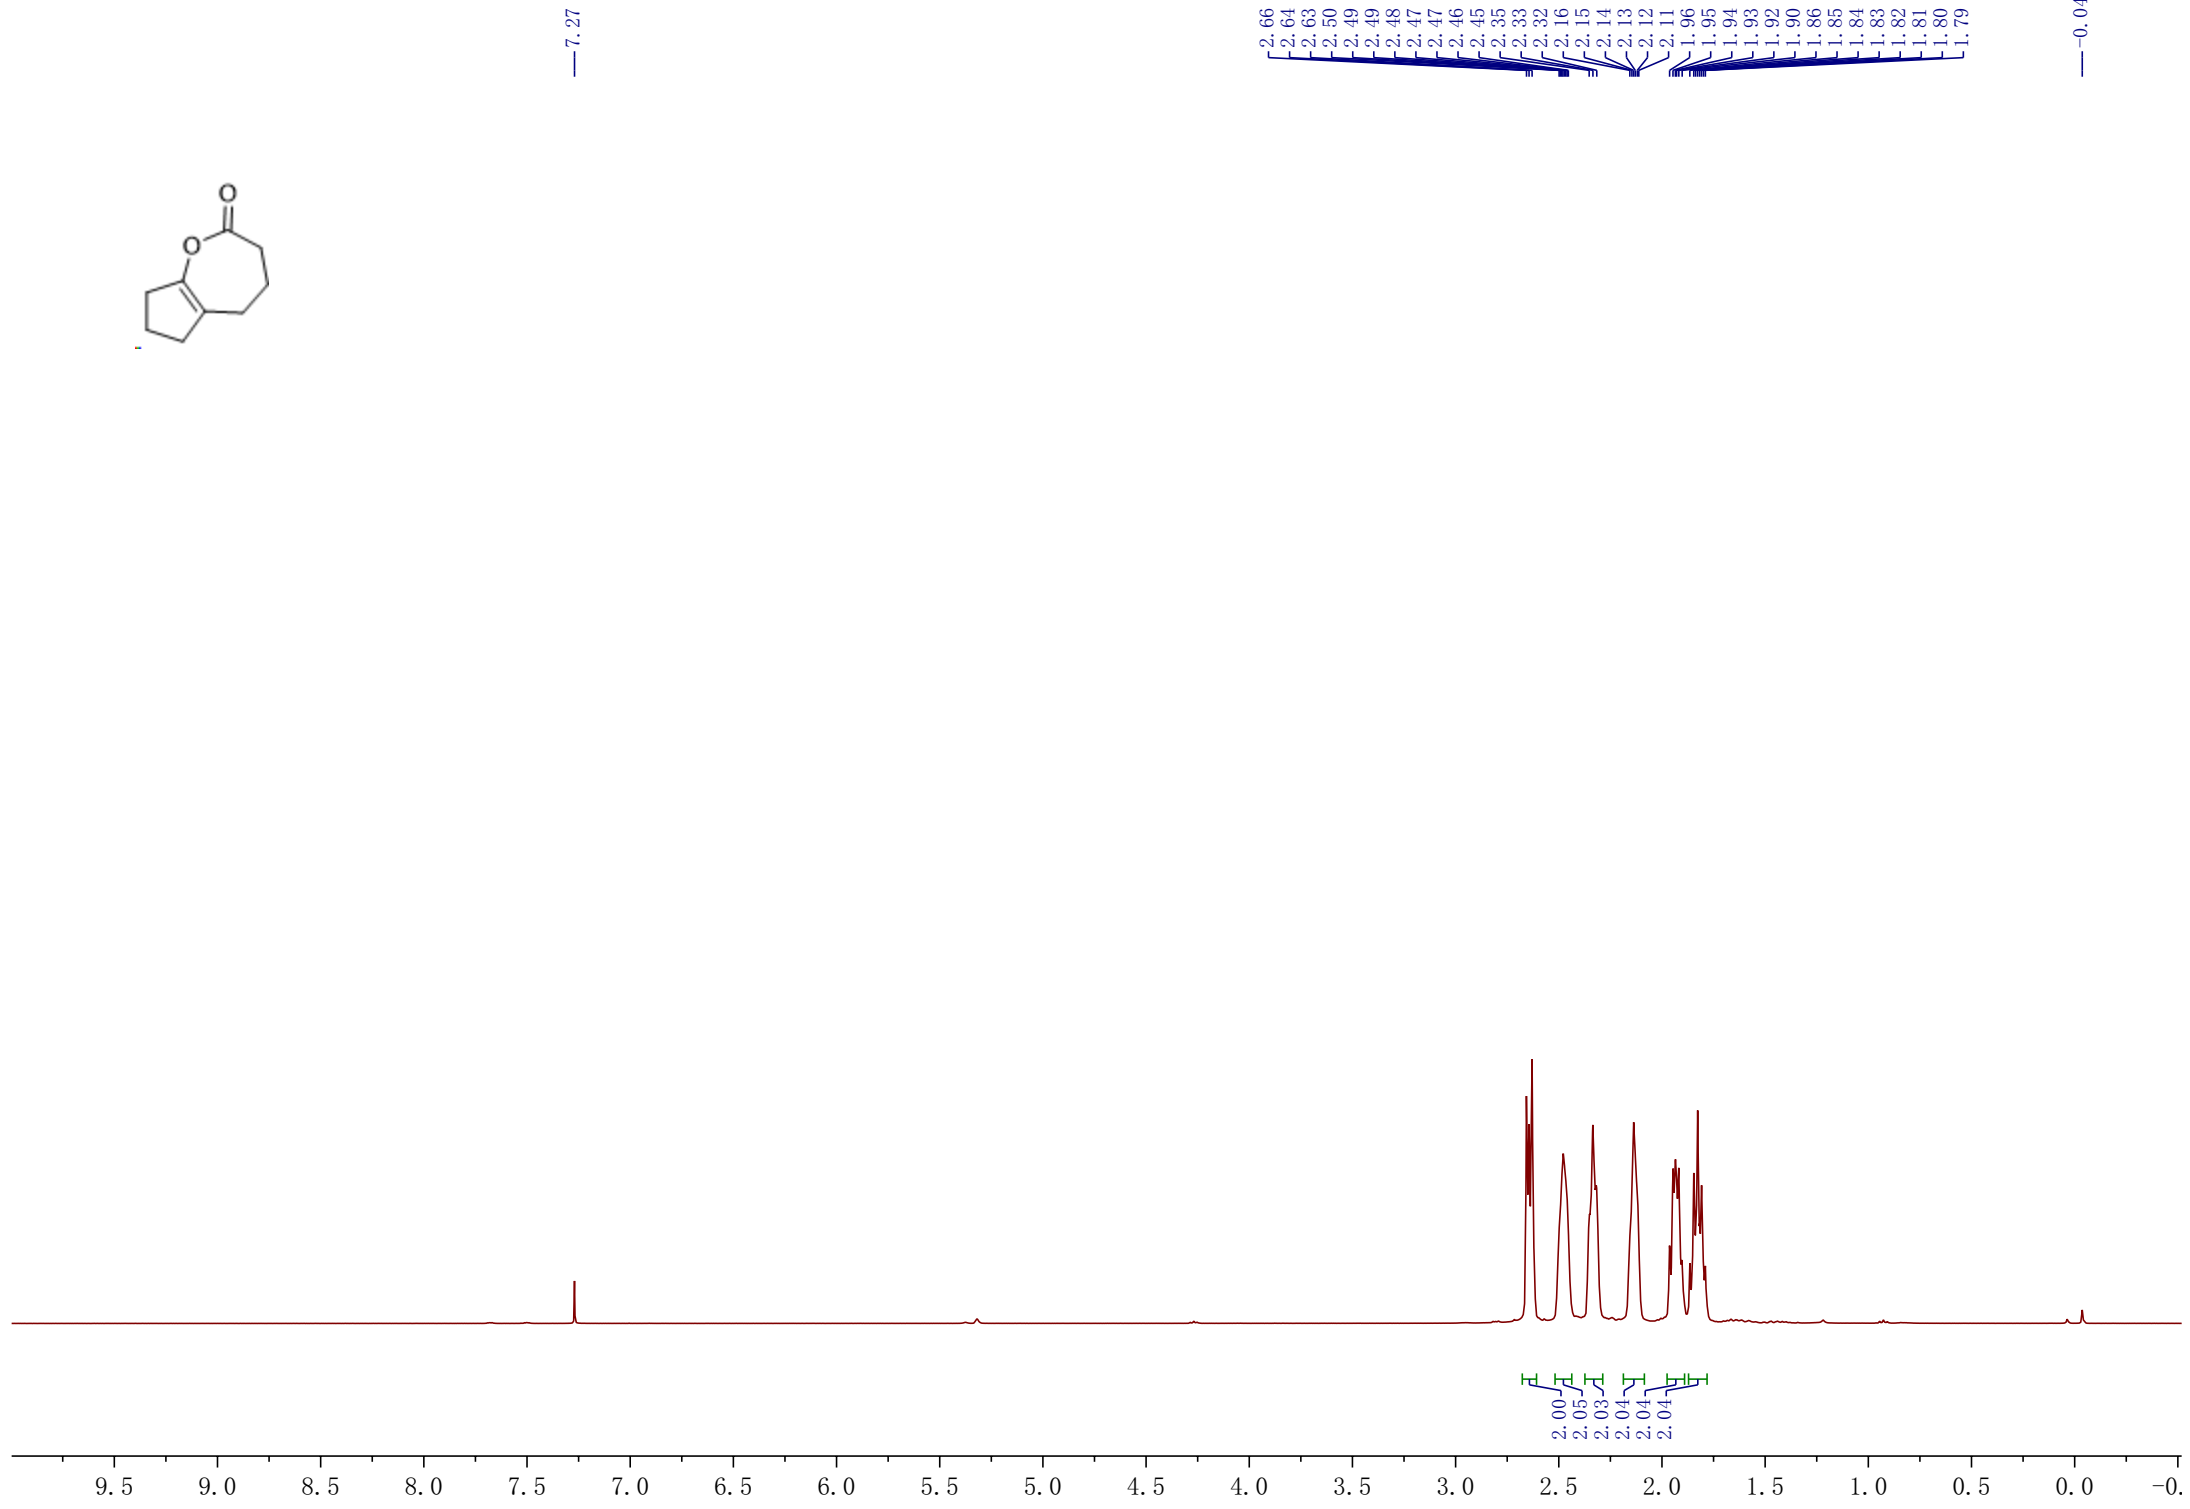

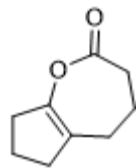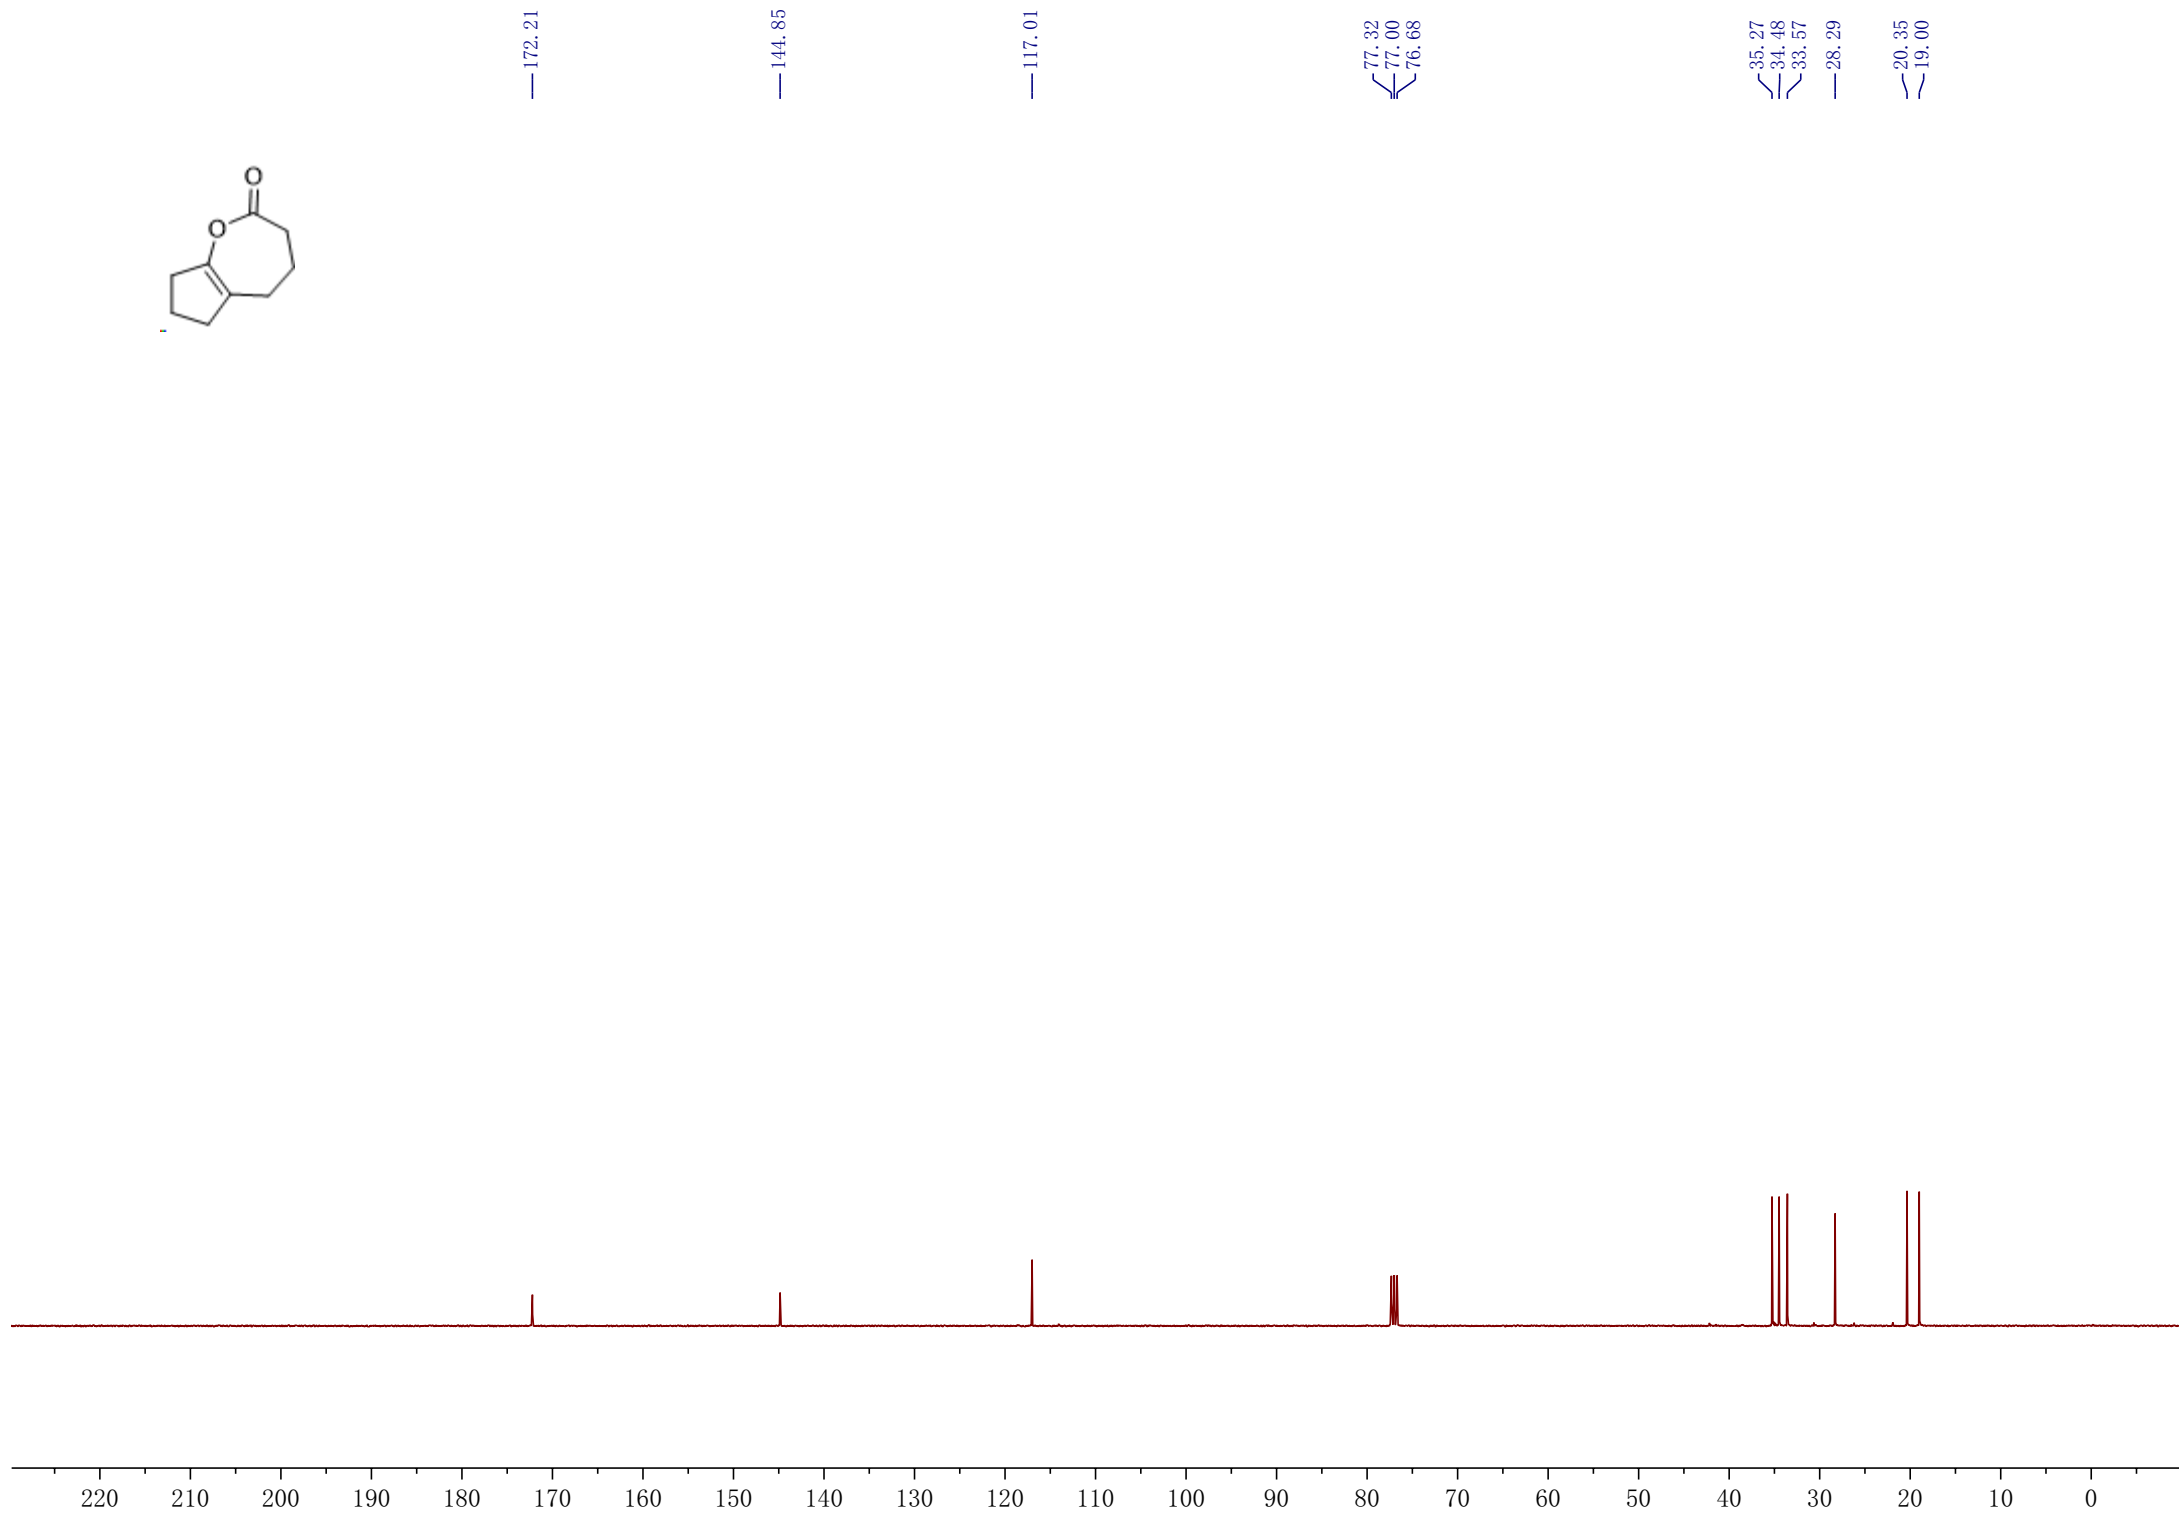

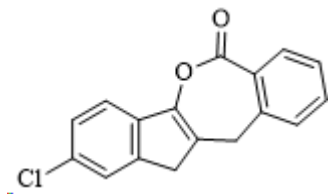

7.92  
7.90  
7.48  
7.47  
7.45  
7.36  
7.34  
7.32  
7.28  
7.27  
7.26  
7.19  
7.17

3.75  
3.43

0.08  
-0.00

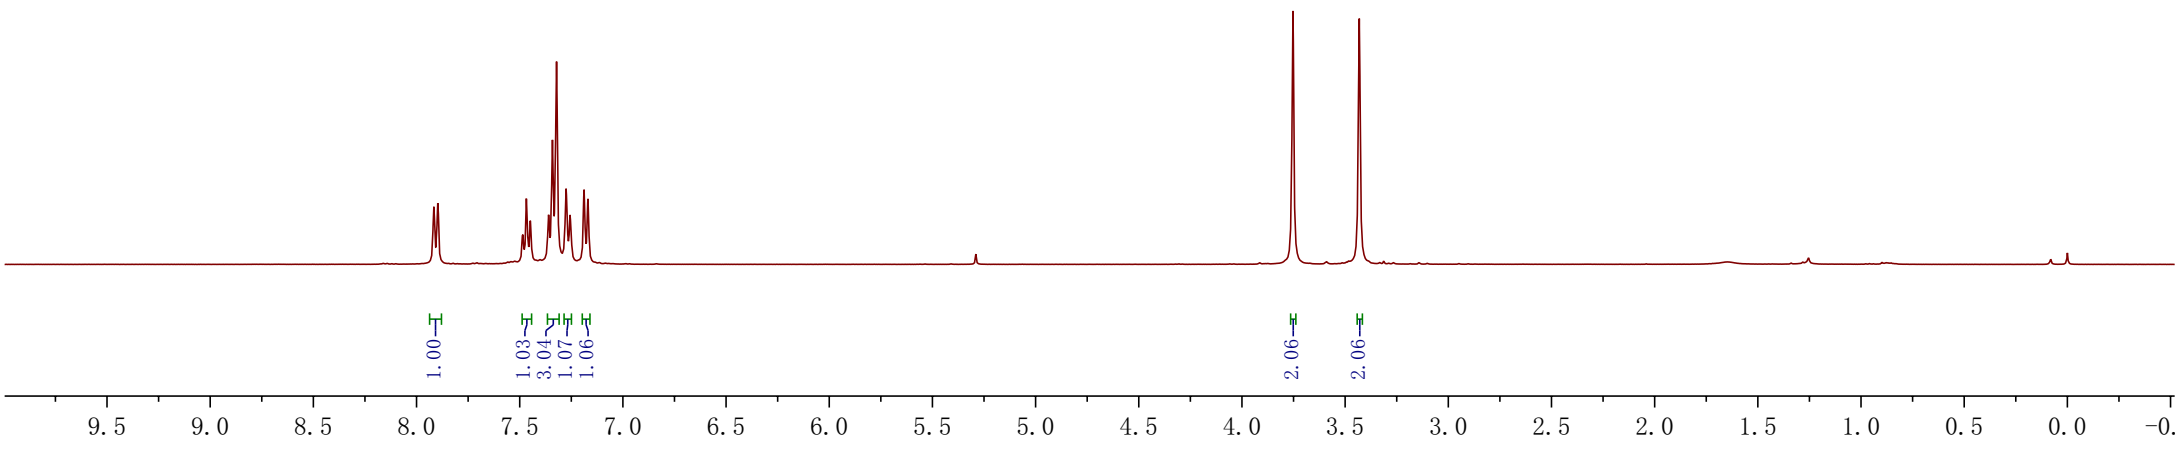

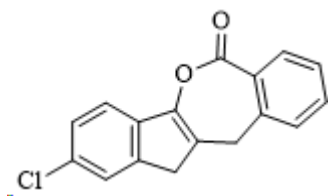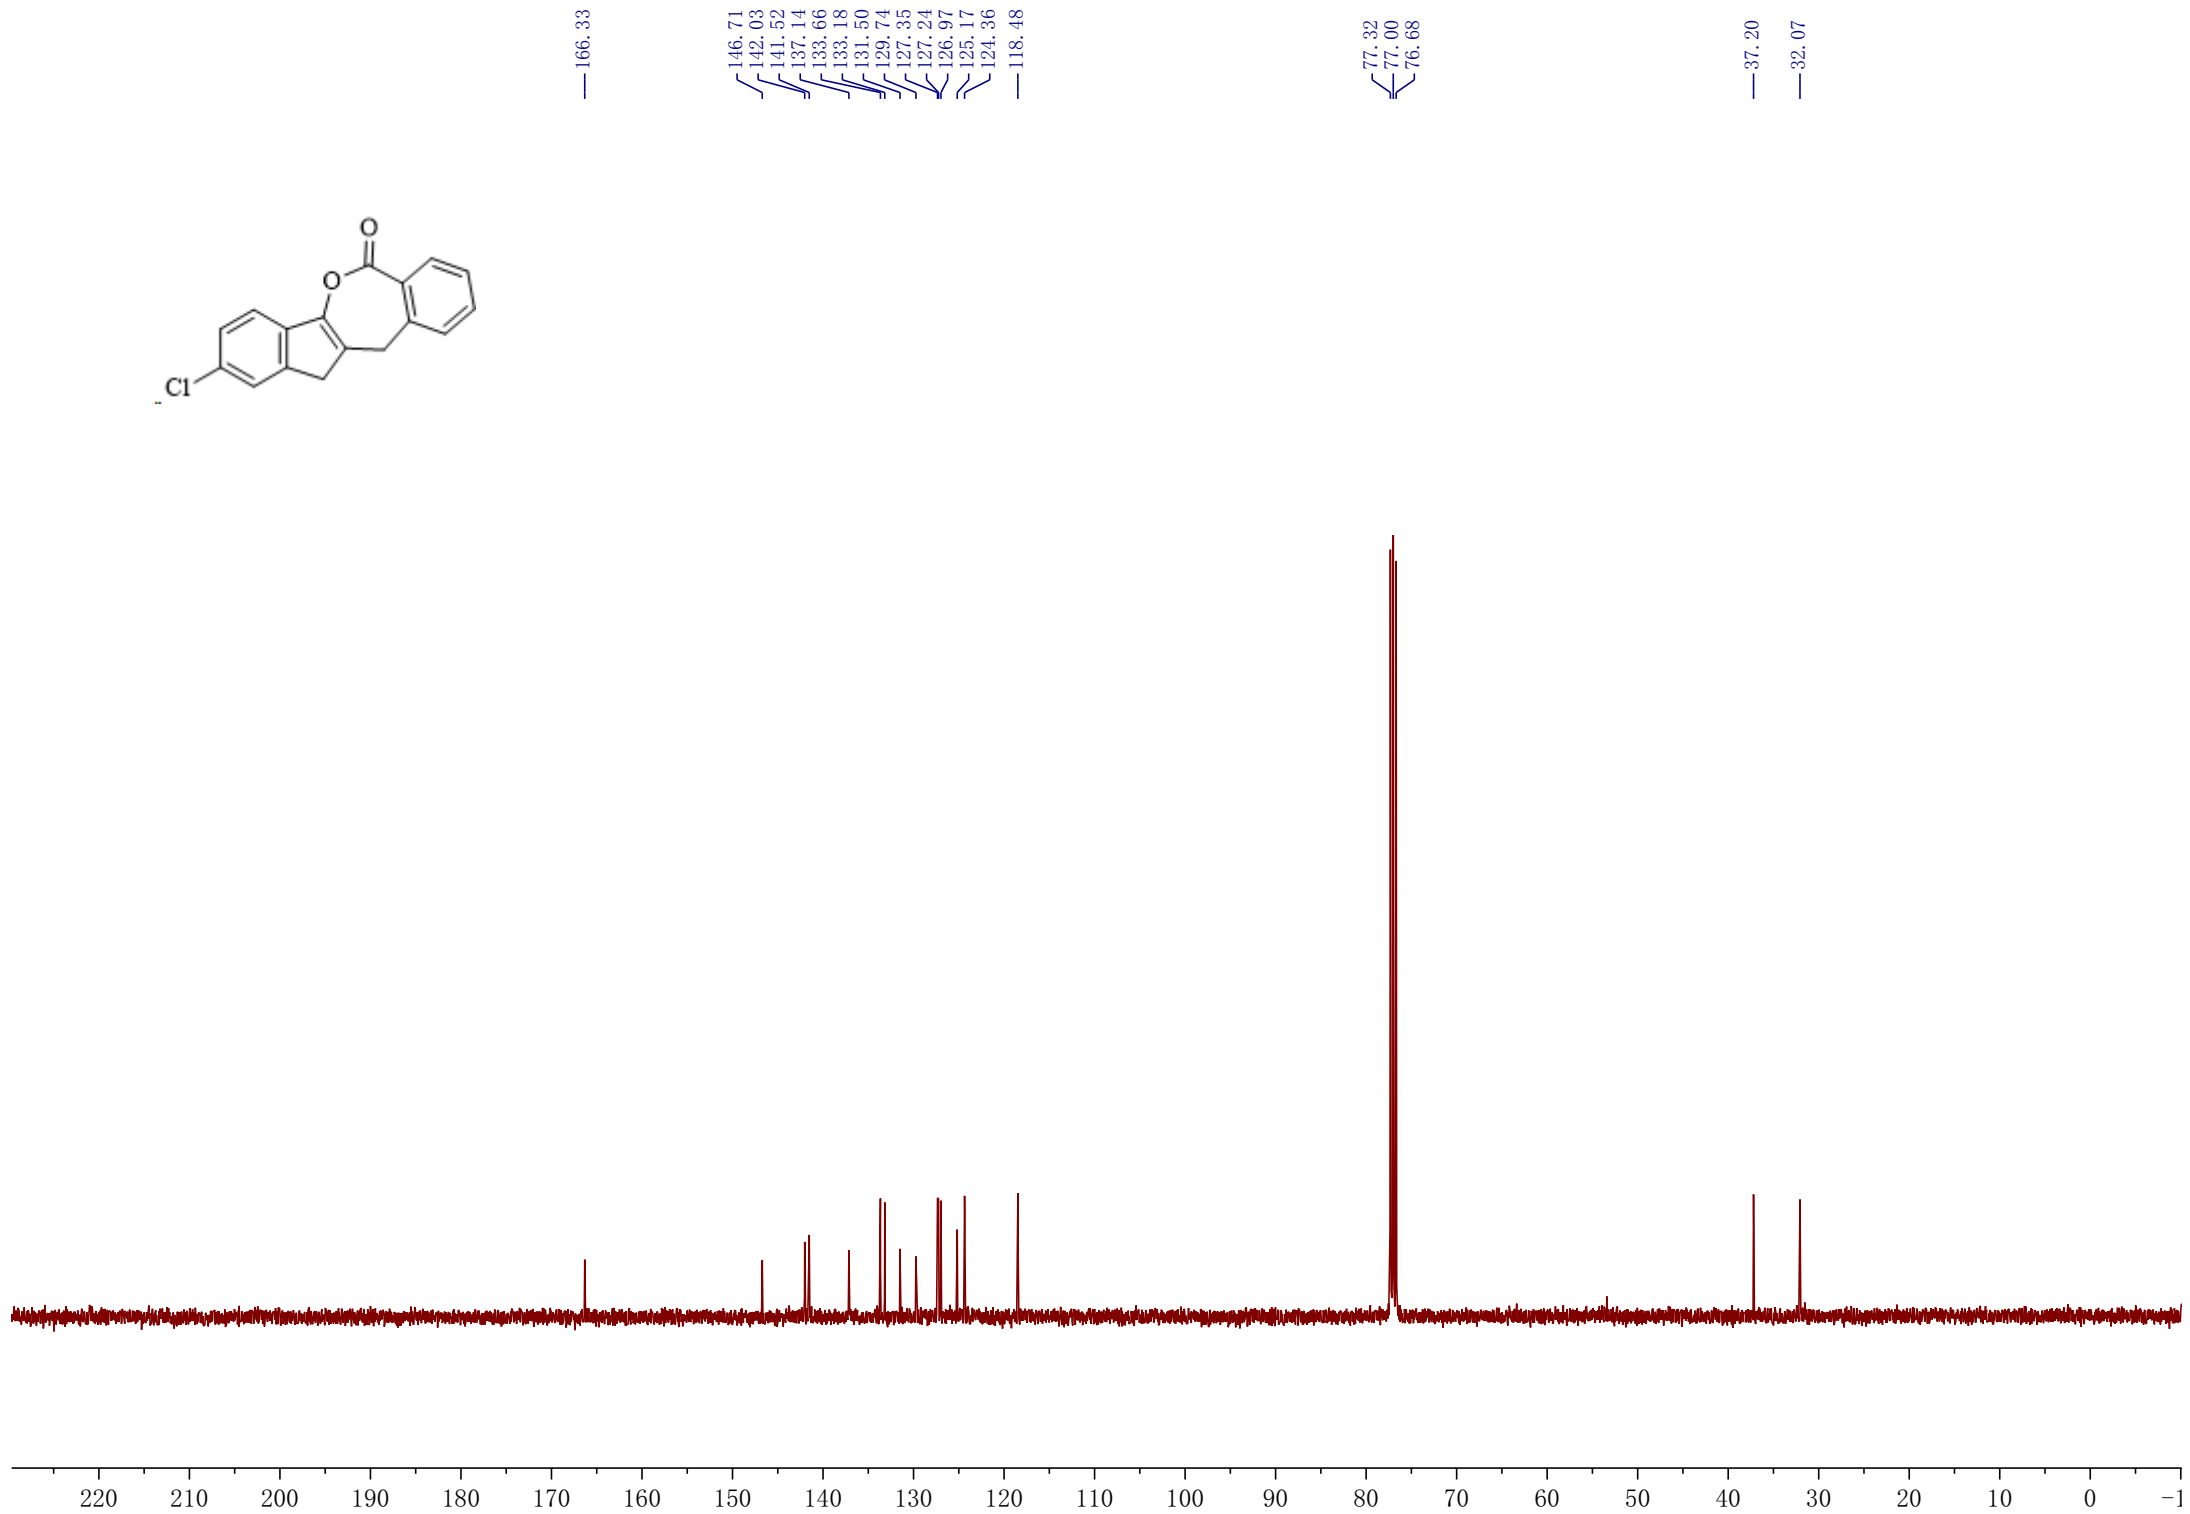



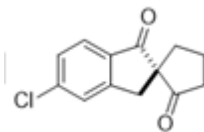

7.65  
7.63  
7.48  
7.48  
7.38  
7.38  
7.37  
7.36  
7.36  
7.35  
7.27

3.49  
3.45  
2.93  
2.88  
2.63  
2.63  
2.62  
2.62  
2.61  
2.60  
2.60  
2.59  
2.59  
2.58  
2.58  
2.57  
2.57  
2.56  
2.56  
2.55  
2.55  
2.55  
2.49  
2.48  
2.47  
2.47  
2.46  
2.45  
2.45  
2.44  
2.44  
2.43  
2.42  
2.41  
2.41  
2.40  
2.39  
2.38  
2.37  
2.37  
2.35  
2.35  
2.33  
2.33  
2.09  
2.08  
2.08  
2.07  
2.06  
2.06  
2.05  
2.05  
2.04  
2.04  
2.03  
2.03  
2.02  
2.02  
-0.01  
-0.07  
0.00

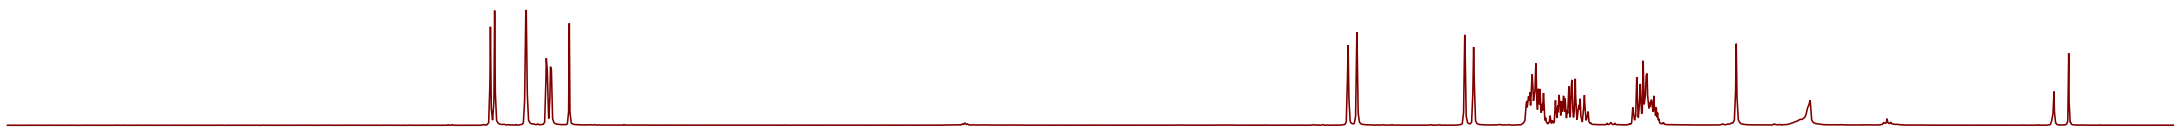

0.95  
0.94  
0.97

1.00

1.01

2.02

2.05

2.06

9.5 9.0 8.5 8.0 7.5 7.0 6.5 6.0 5.5 5.0 4.5 4.0 3.5 3.0 2.5 2.0 1.5 1.0 0.5 0.0 -0.

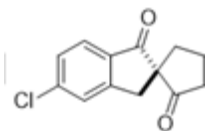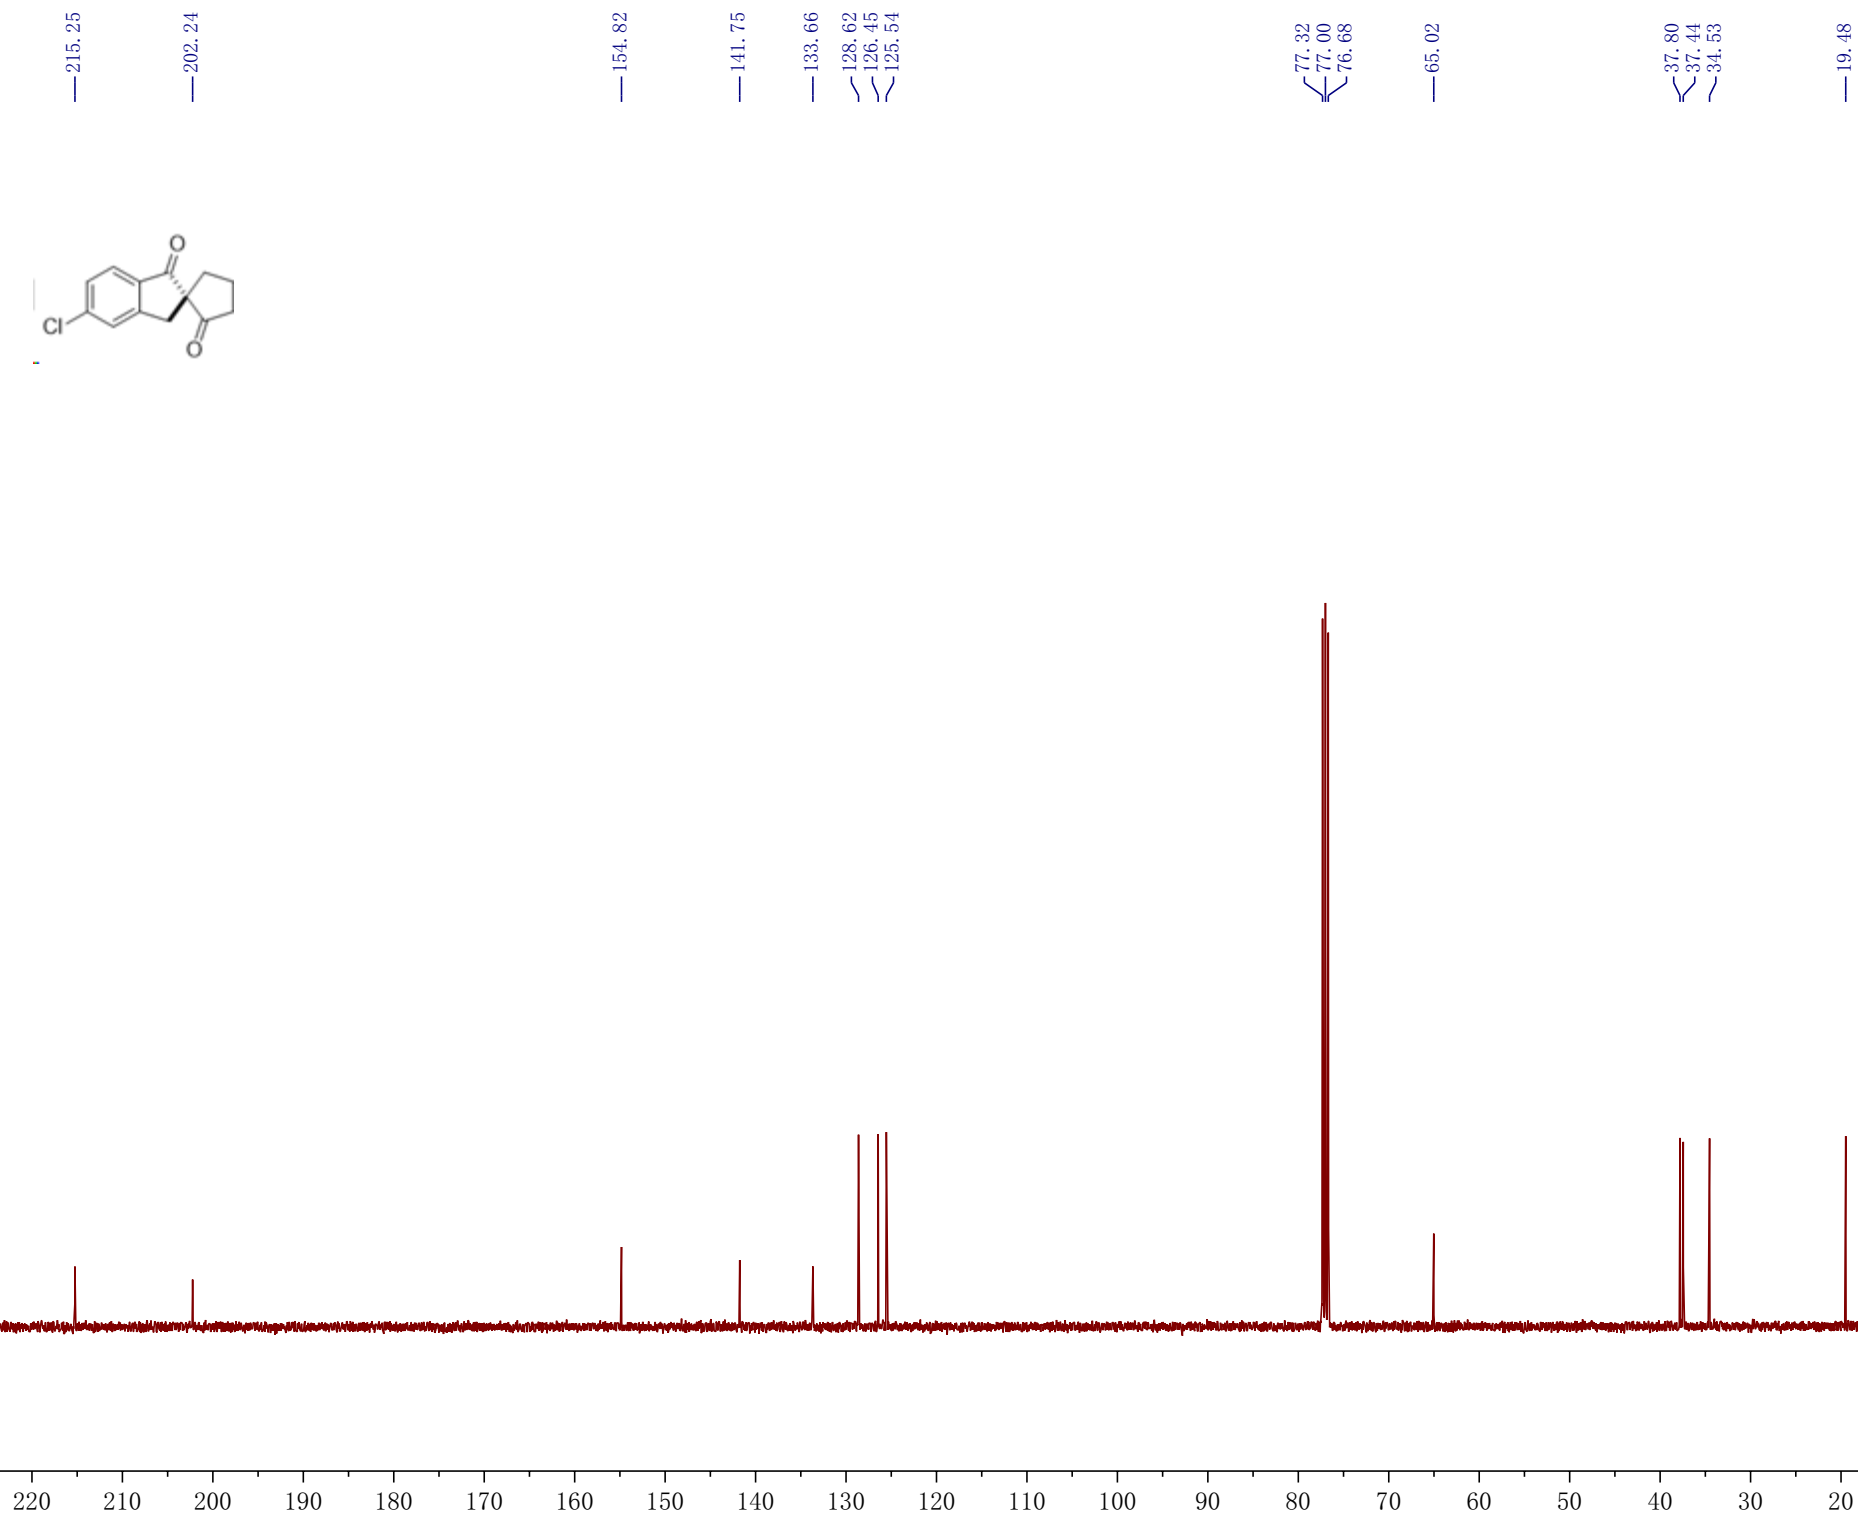

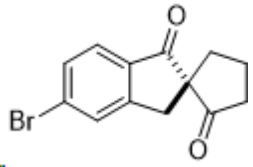

7.65  
7.57  
7.55  
7.53  
7.51  
7.27

3.49  
3.45  
2.93  
2.88  
2.62  
2.62  
2.61  
2.60  
2.59  
2.59  
2.58  
2.58  
2.57  
2.57  
2.56  
2.55  
2.54  
2.54  
2.53  
2.48  
2.47  
2.47  
2.46  
2.45  
2.44  
2.44  
2.44  
2.43  
2.43  
2.42  
2.41  
2.40  
2.40  
2.39  
2.38  
2.37  
2.37  
2.36  
2.34  
2.34  
2.32  
2.11  
2.09  
2.07  
2.07  
2.05  
2.05  
2.04  
2.04  
2.03  
2.03  
2.02  
2.02  
2.01  
2.00  
1.99  
-0.00

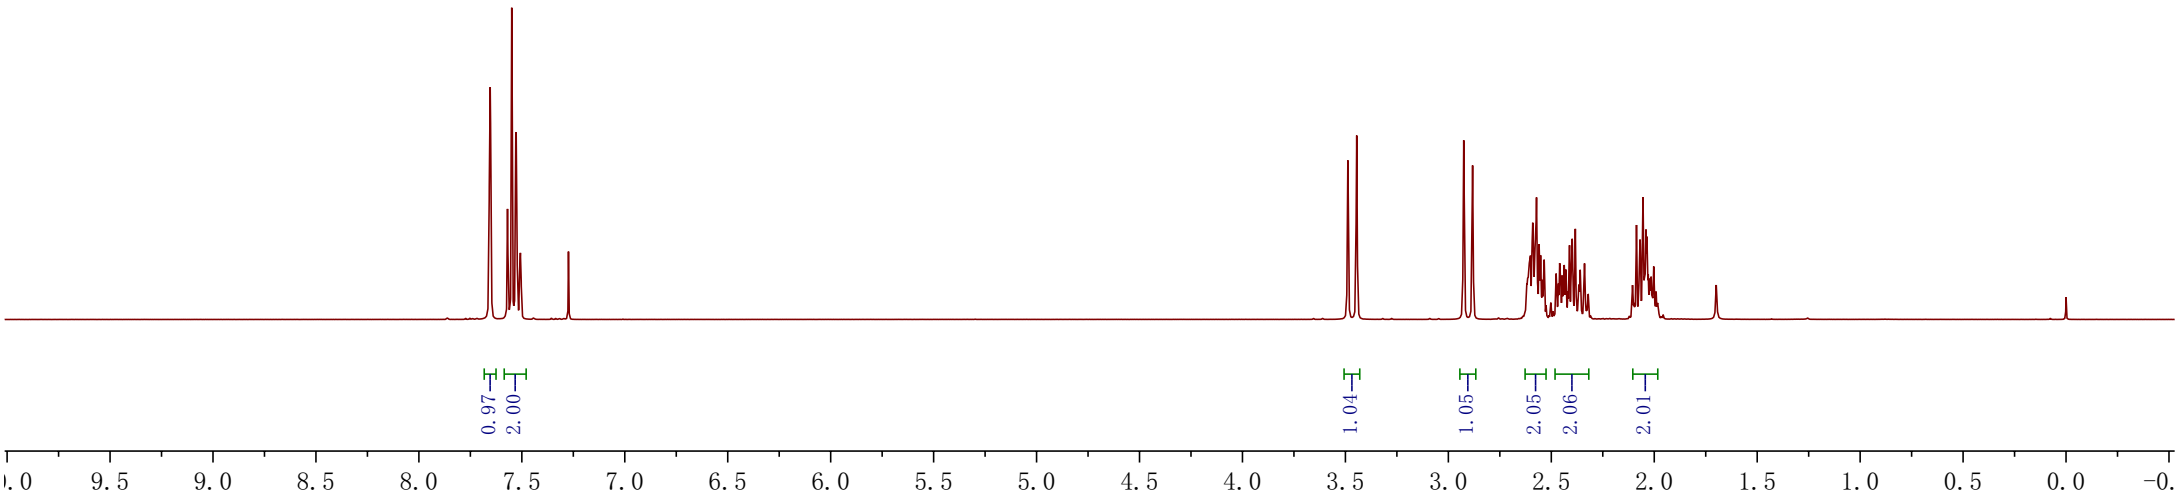

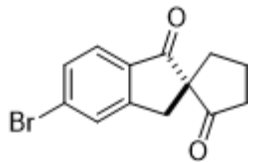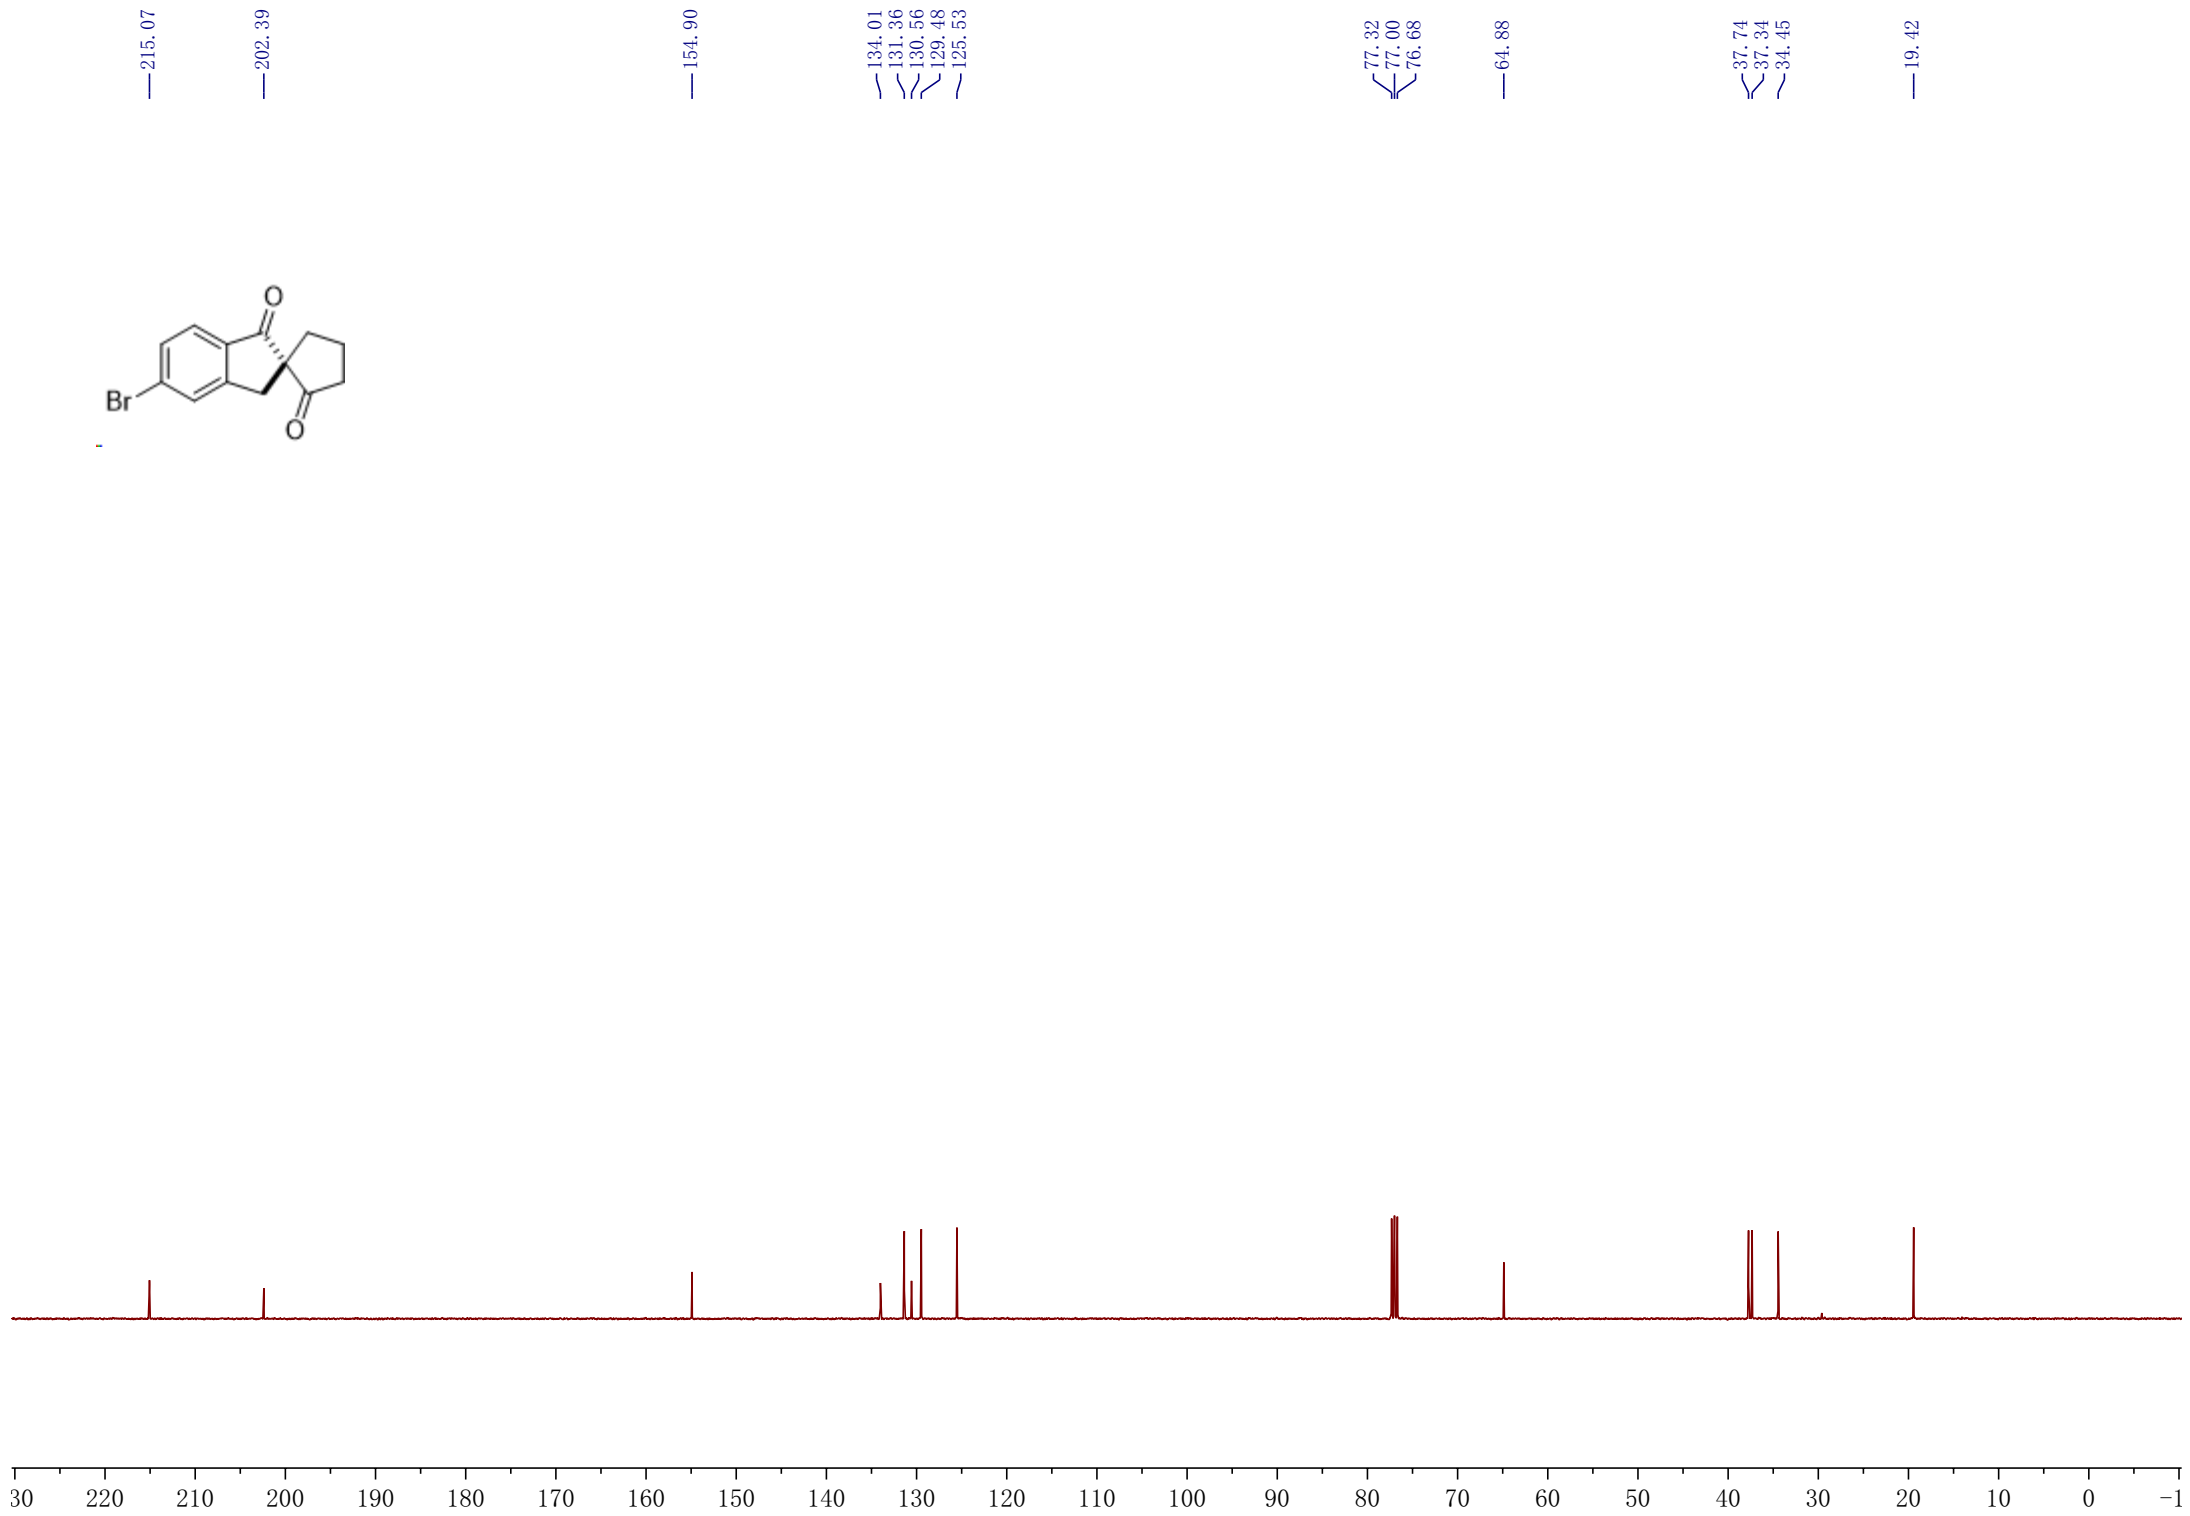

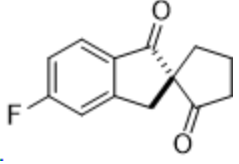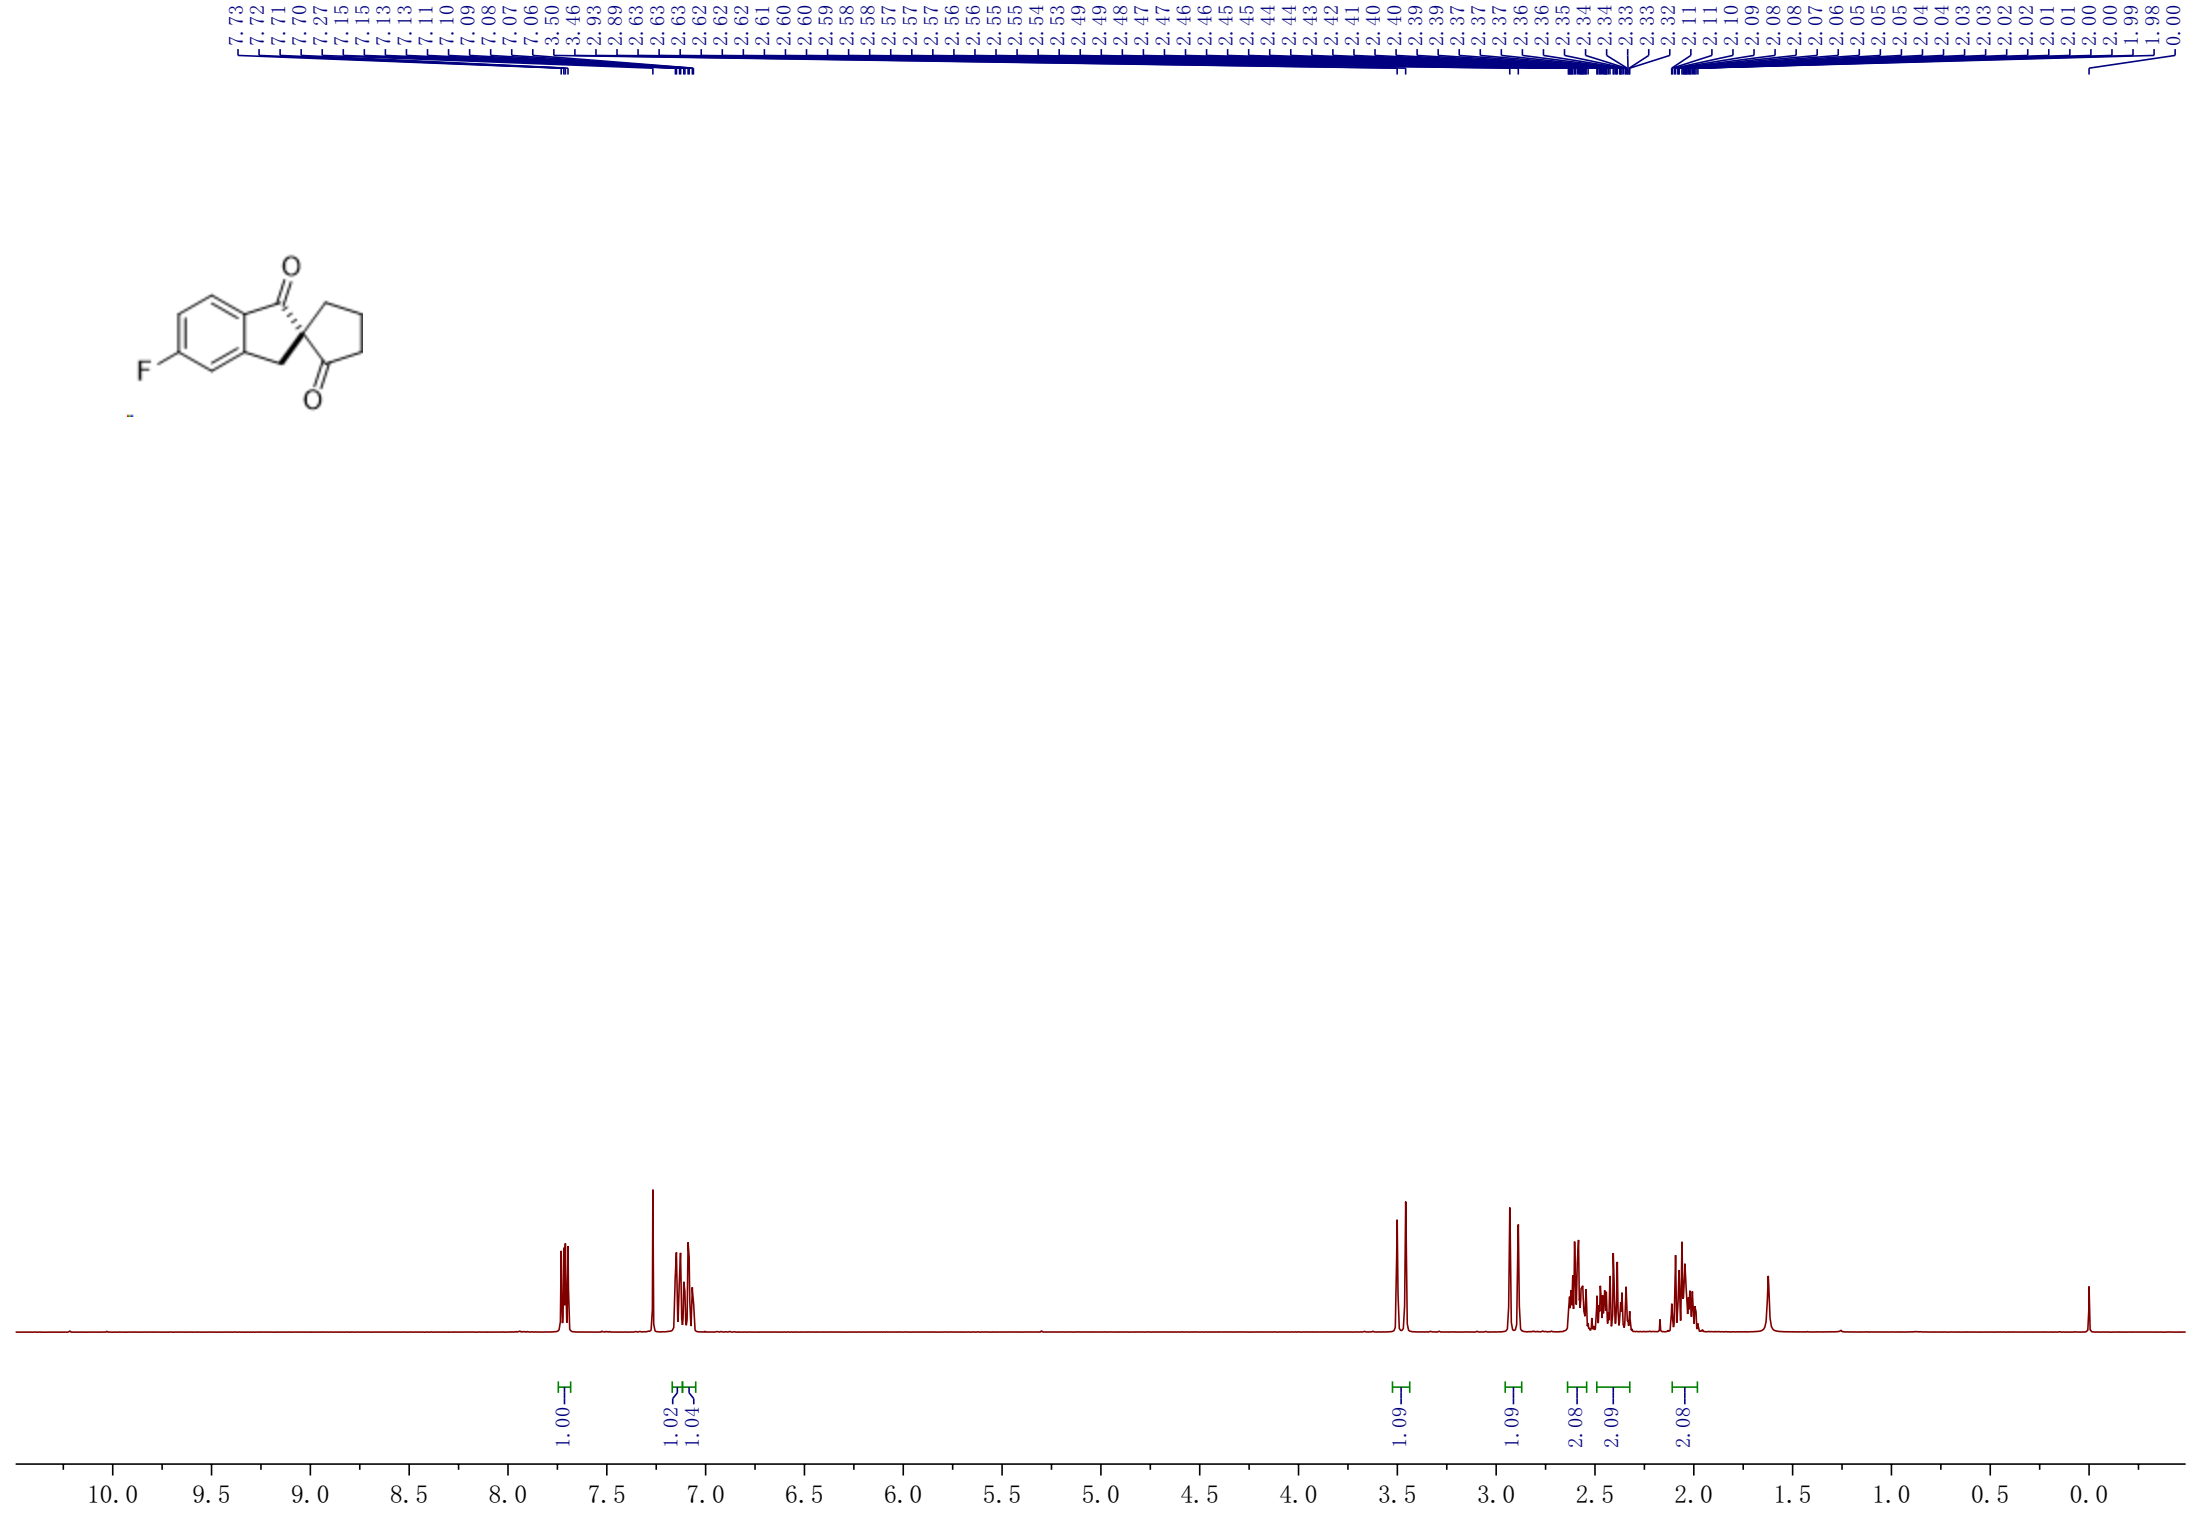

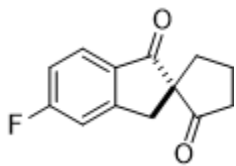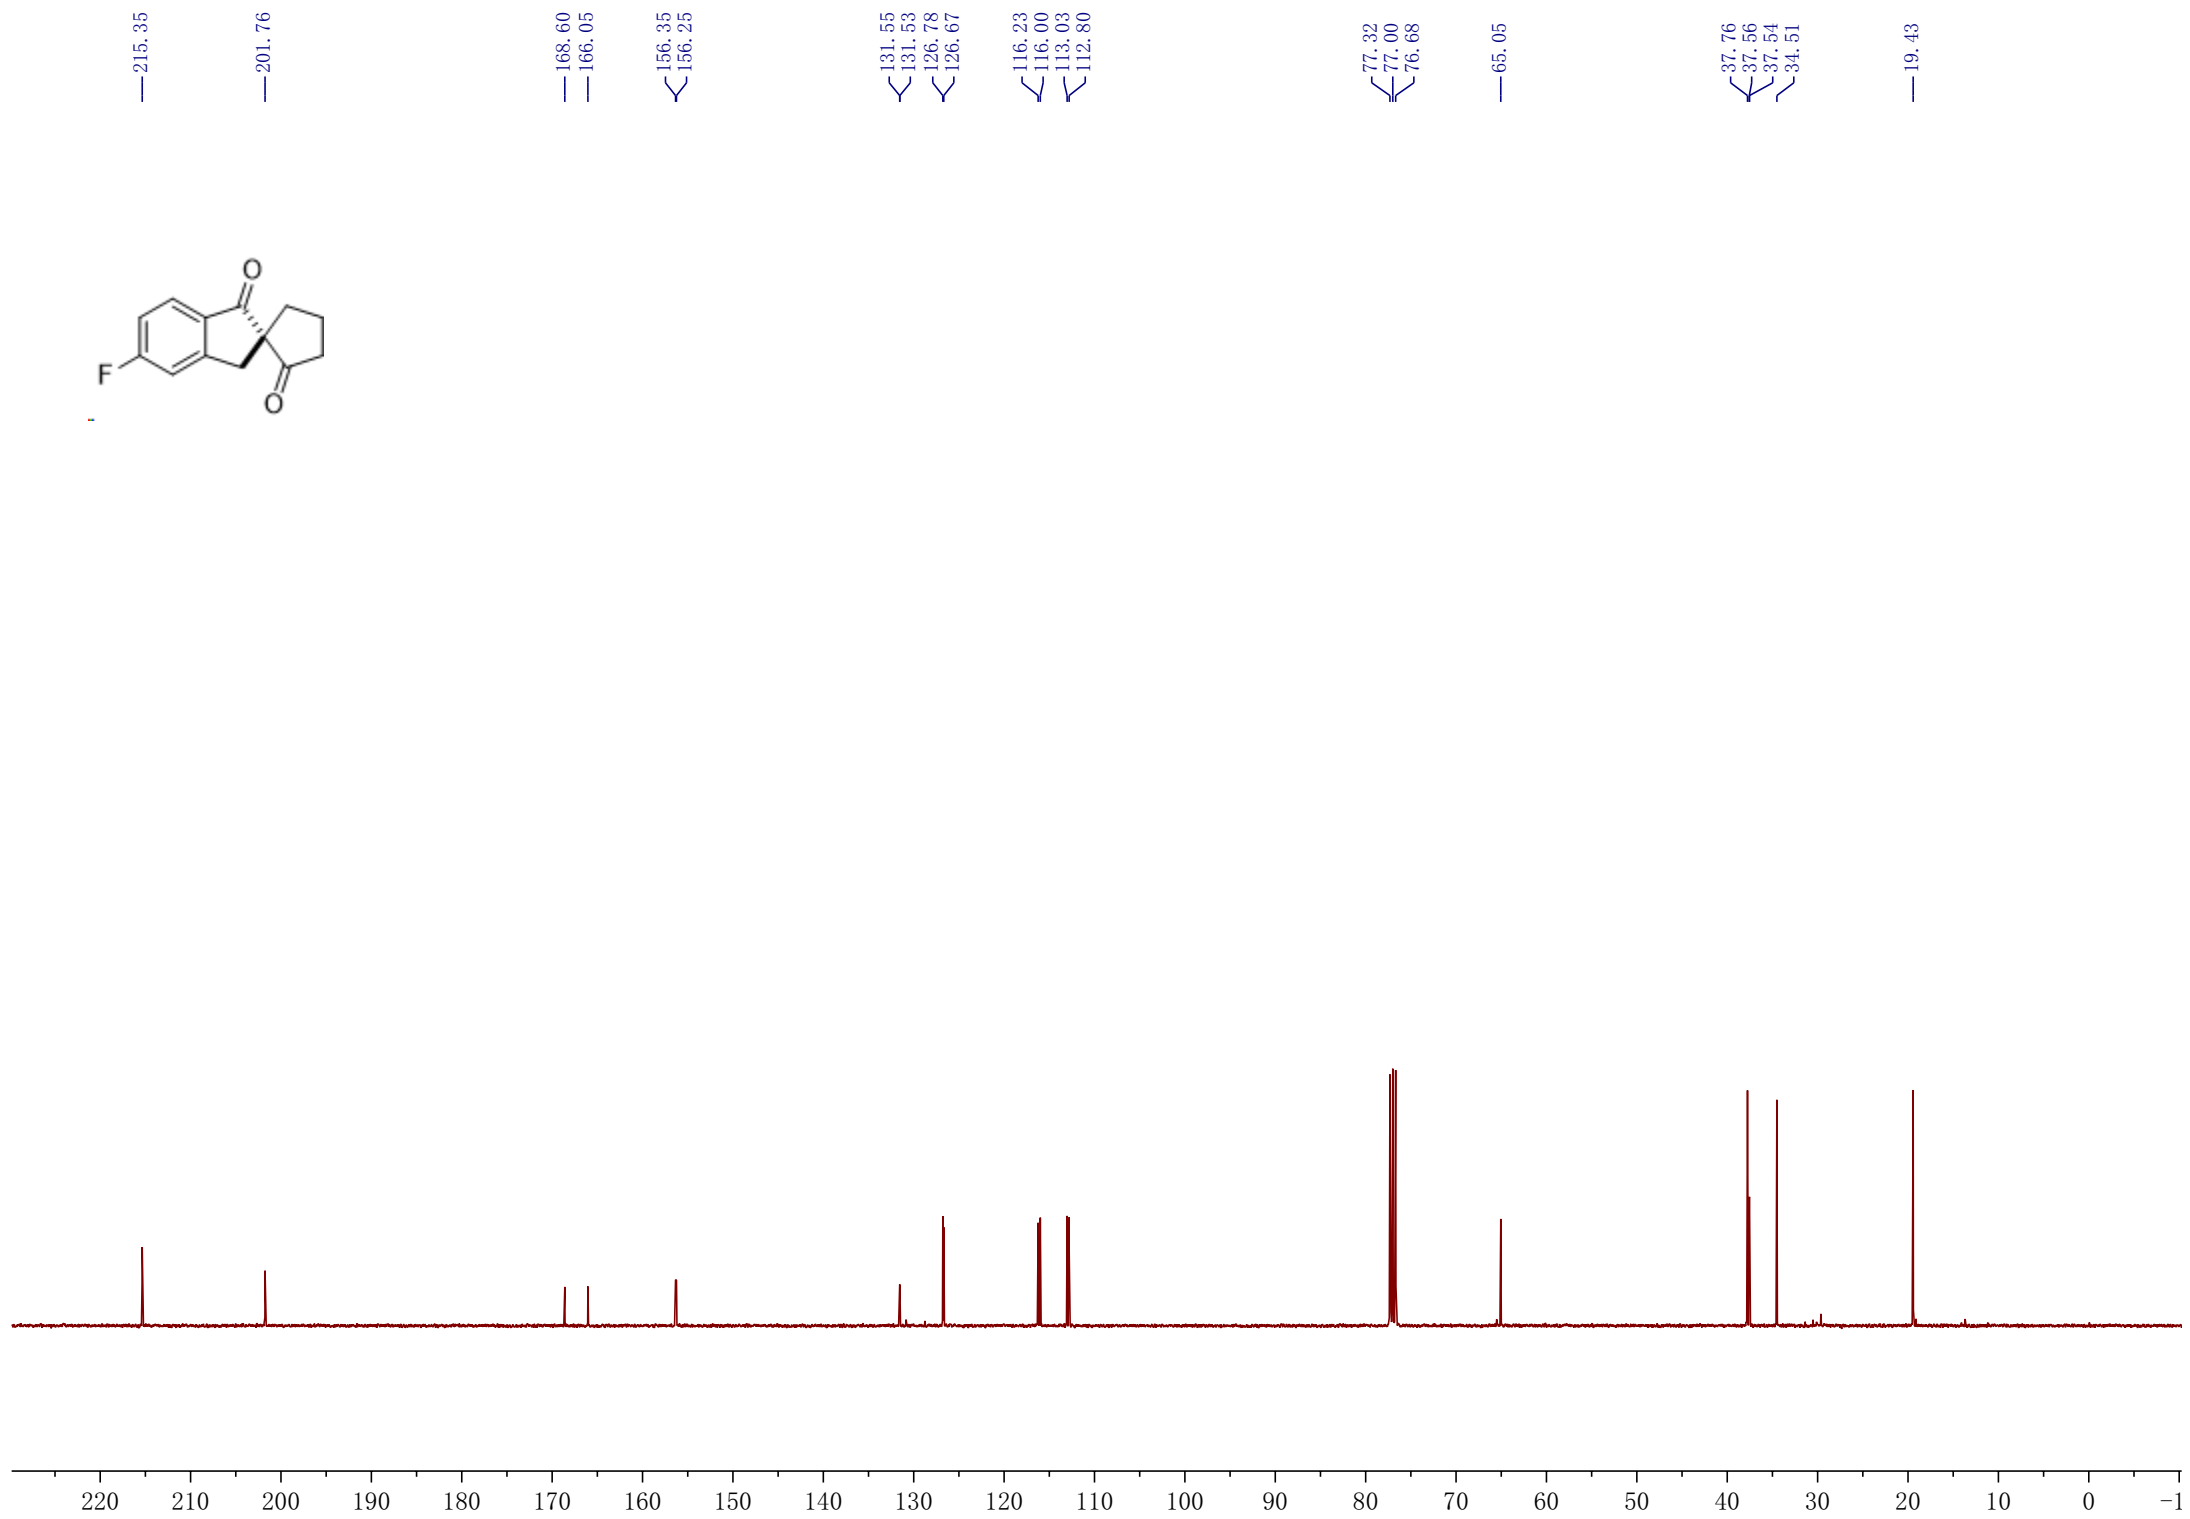

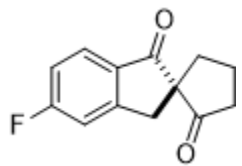

—101.98

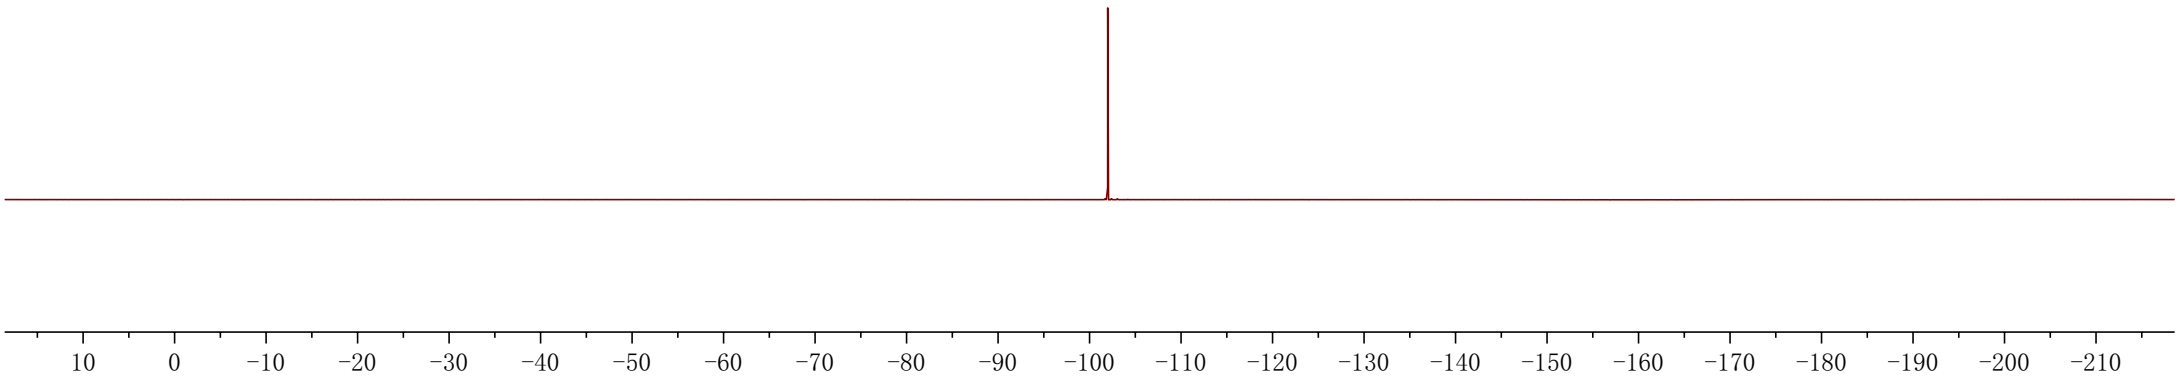

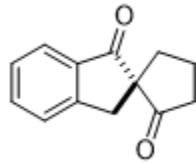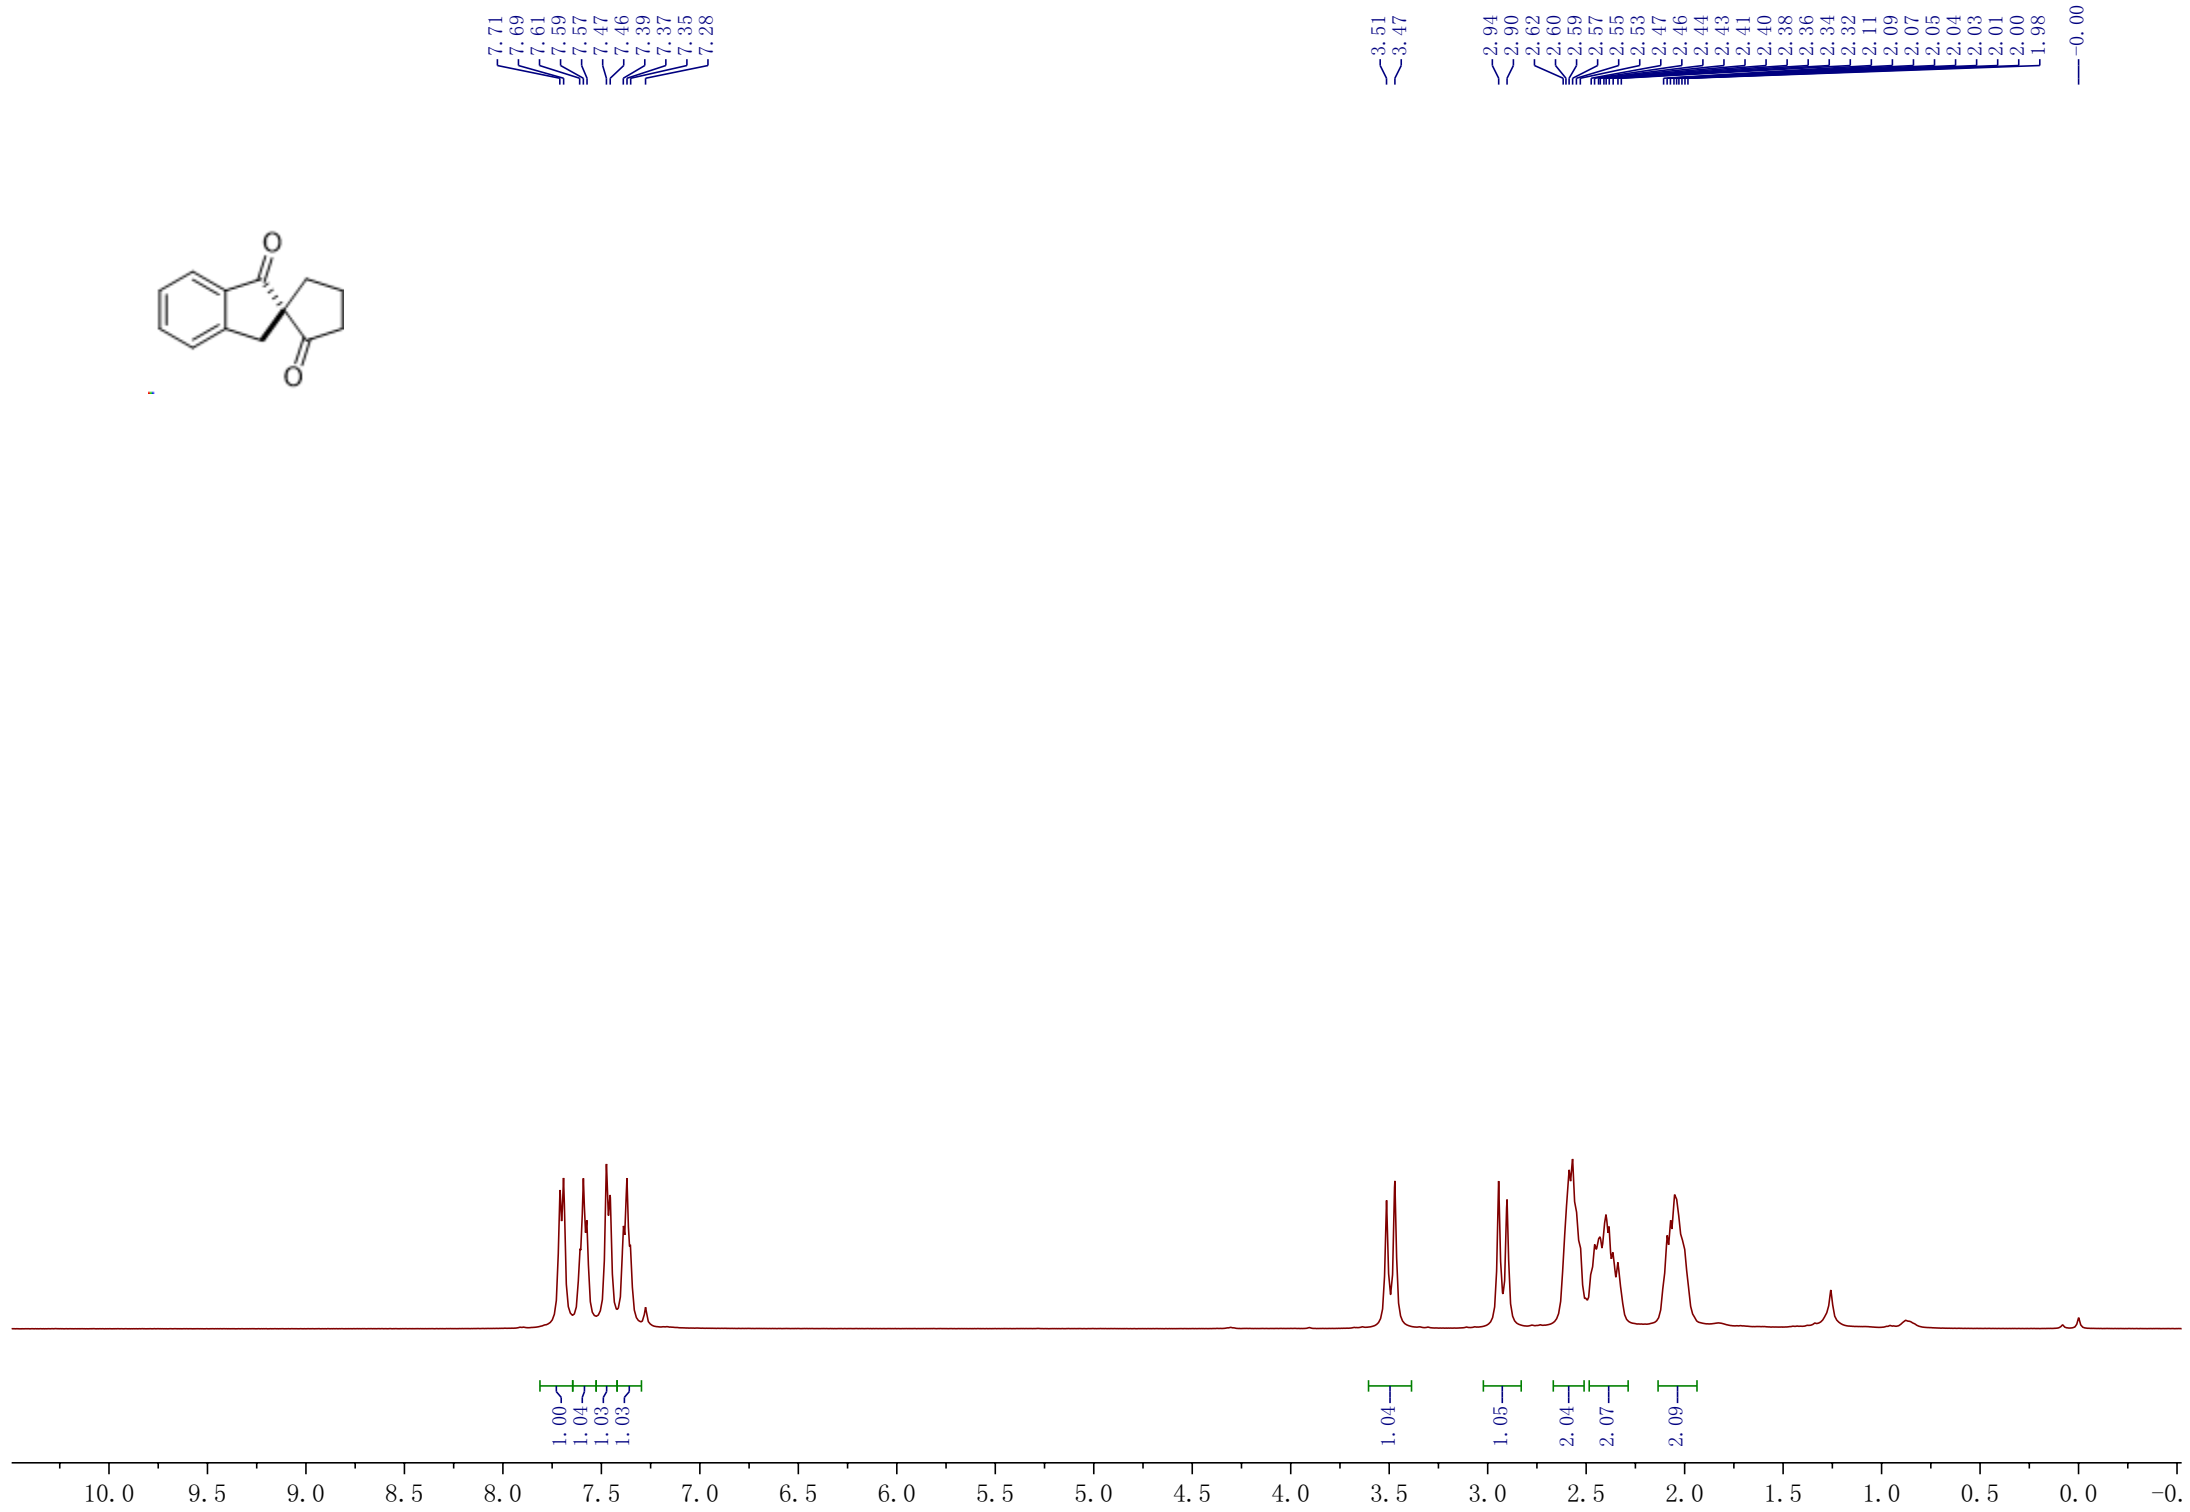



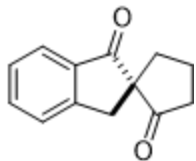

—215.71

—203.74

—153.40

135.15  
135.02

127.66  
126.14  
124.36

77.32  
77.00  
76.68

—64.73

37.87  
37.80  
34.63

—19.46

30 220 210 200 190 180 170 160 150 140 130 120 110 100 90 80 70 60 50 40 30 20 10 0 -10

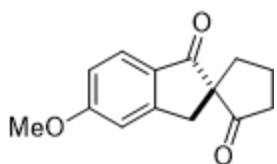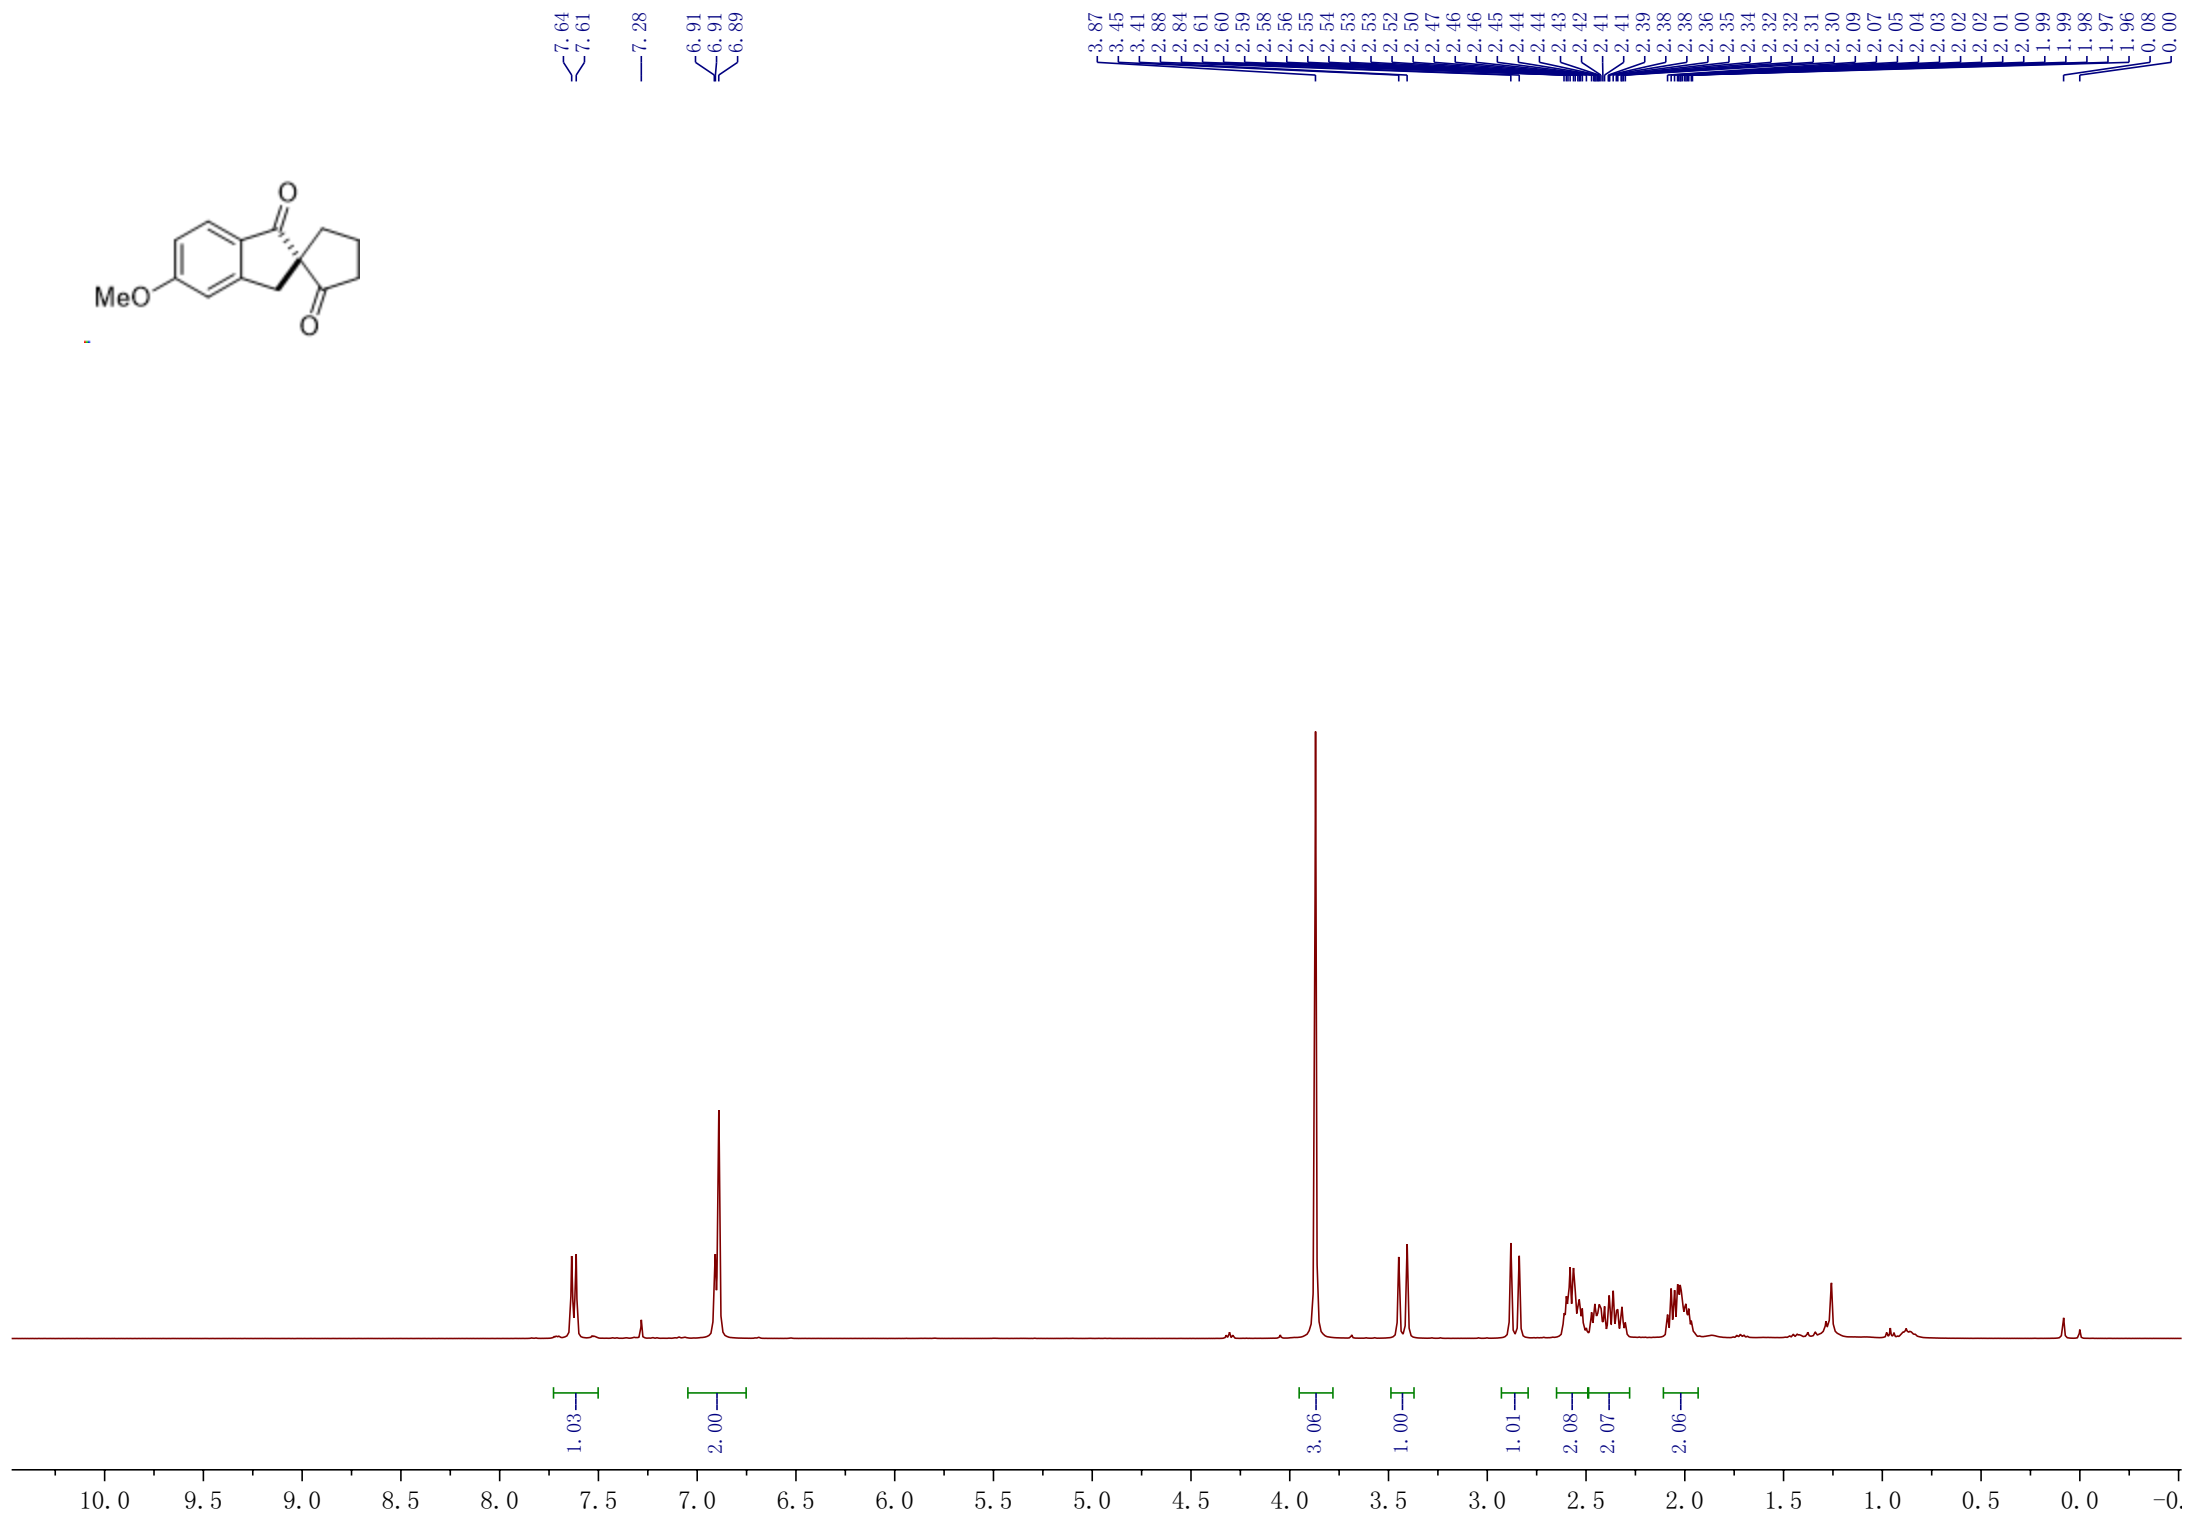

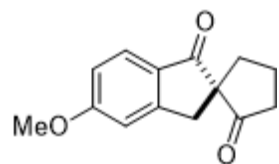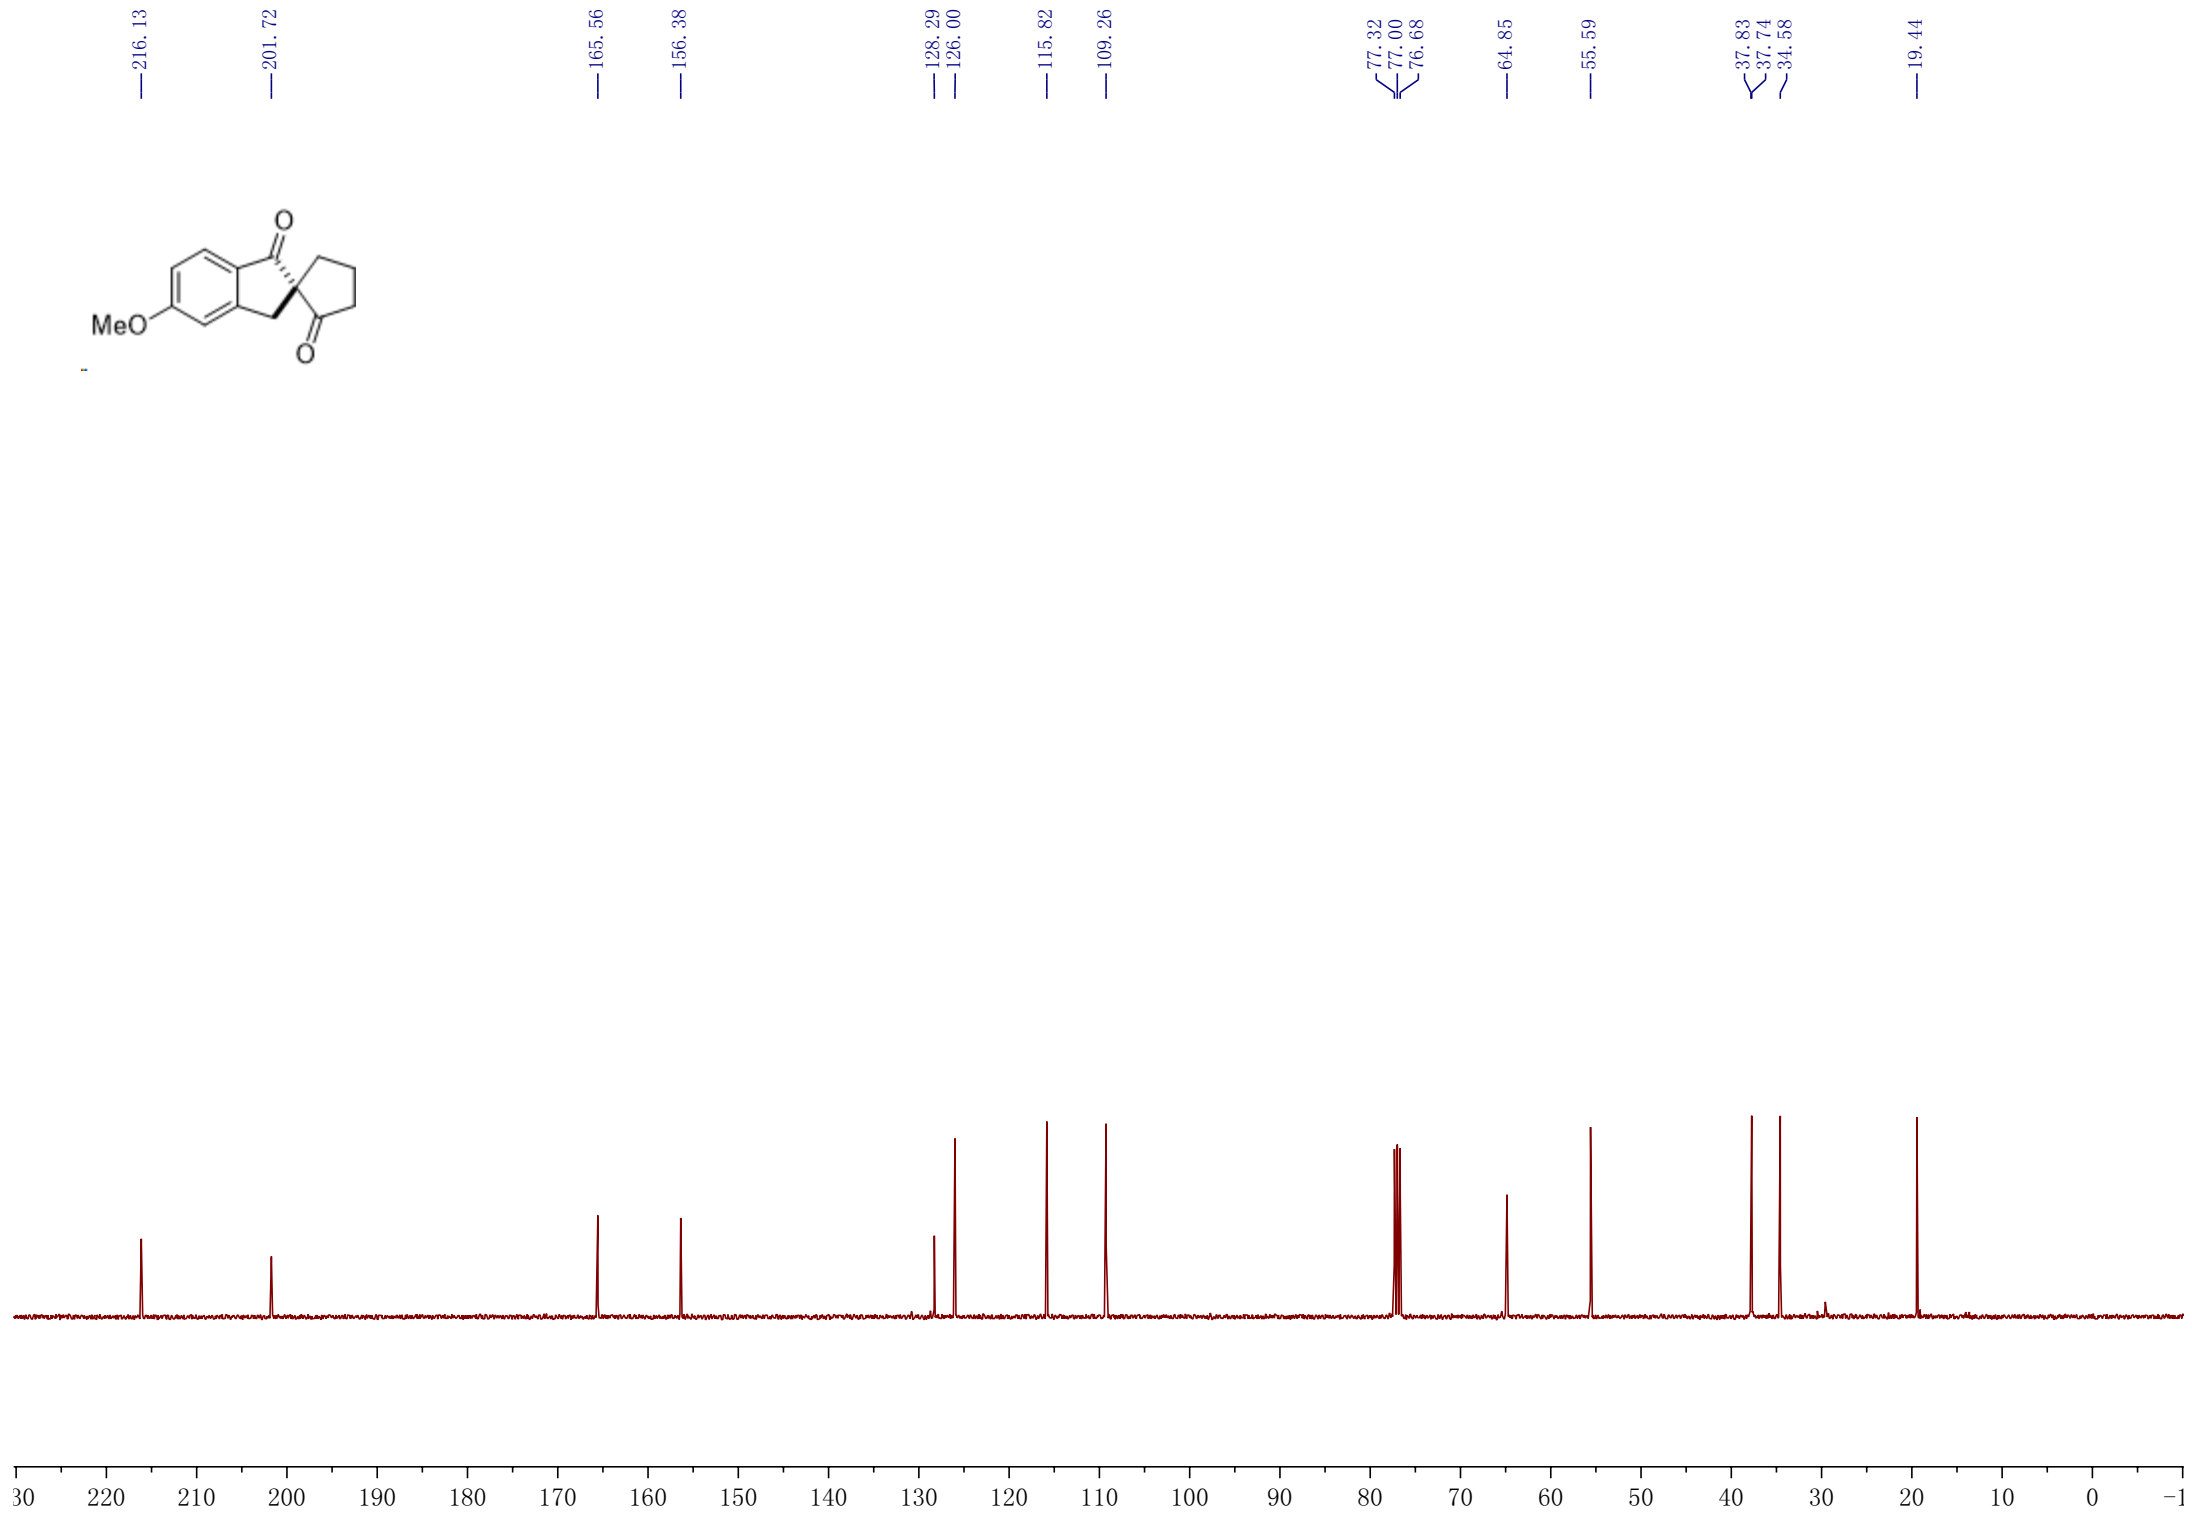

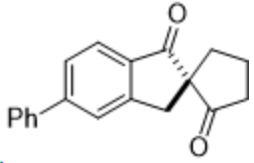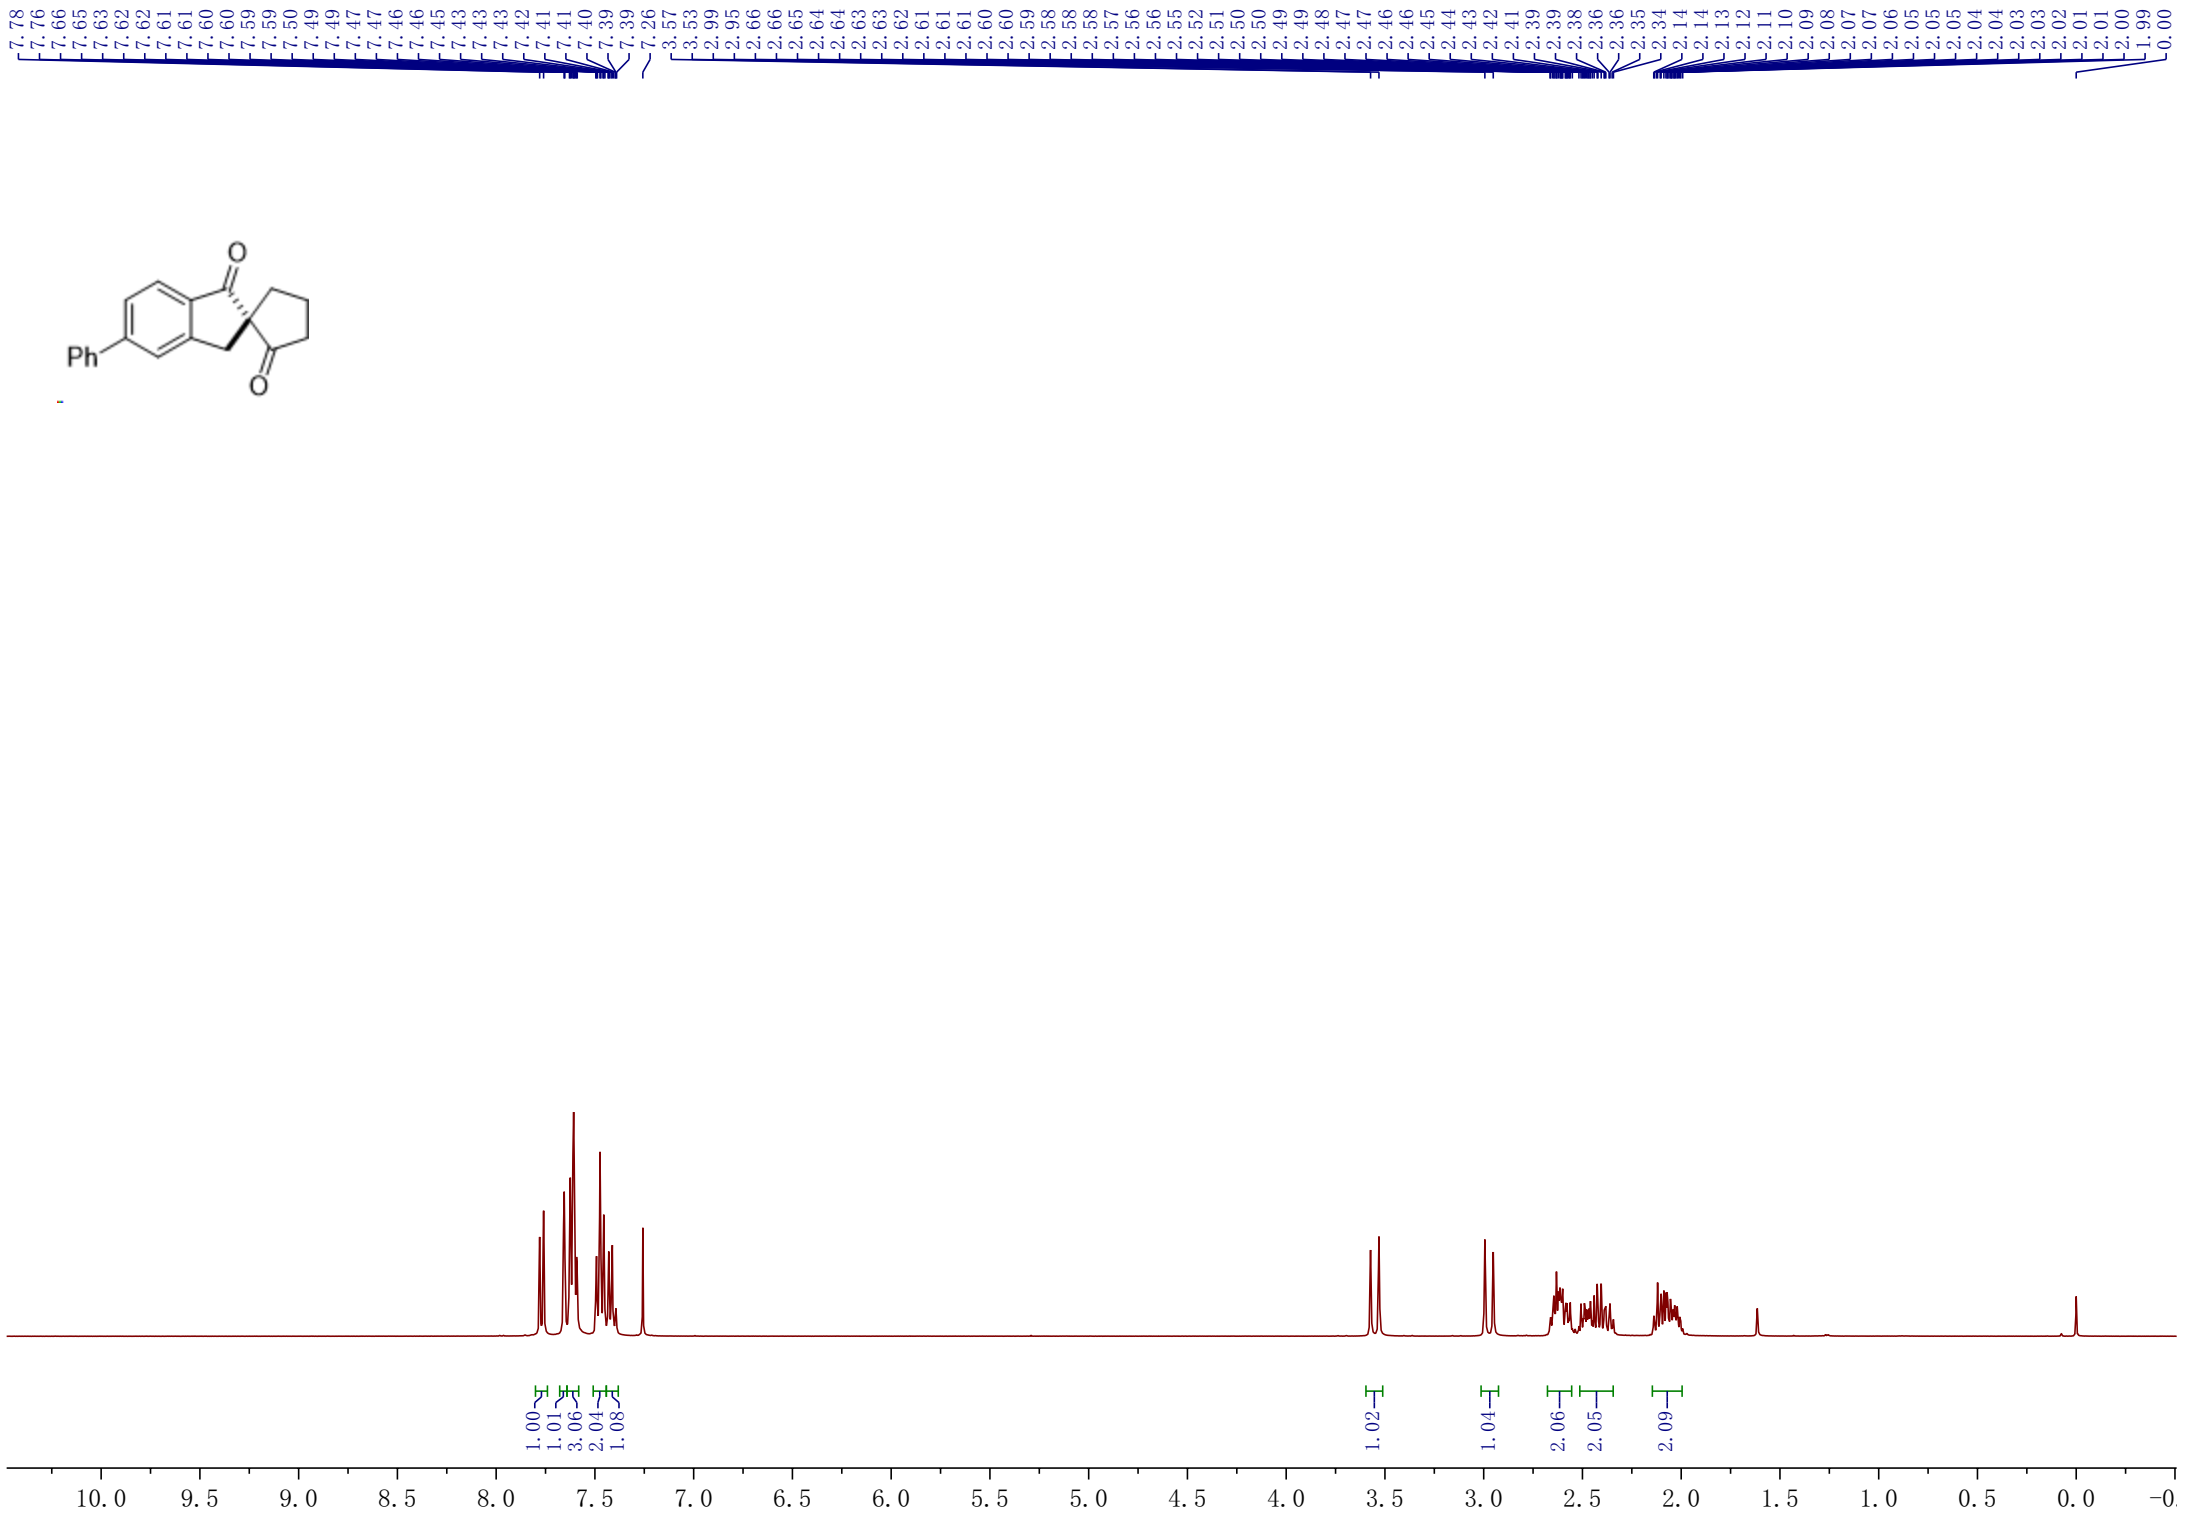

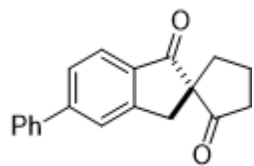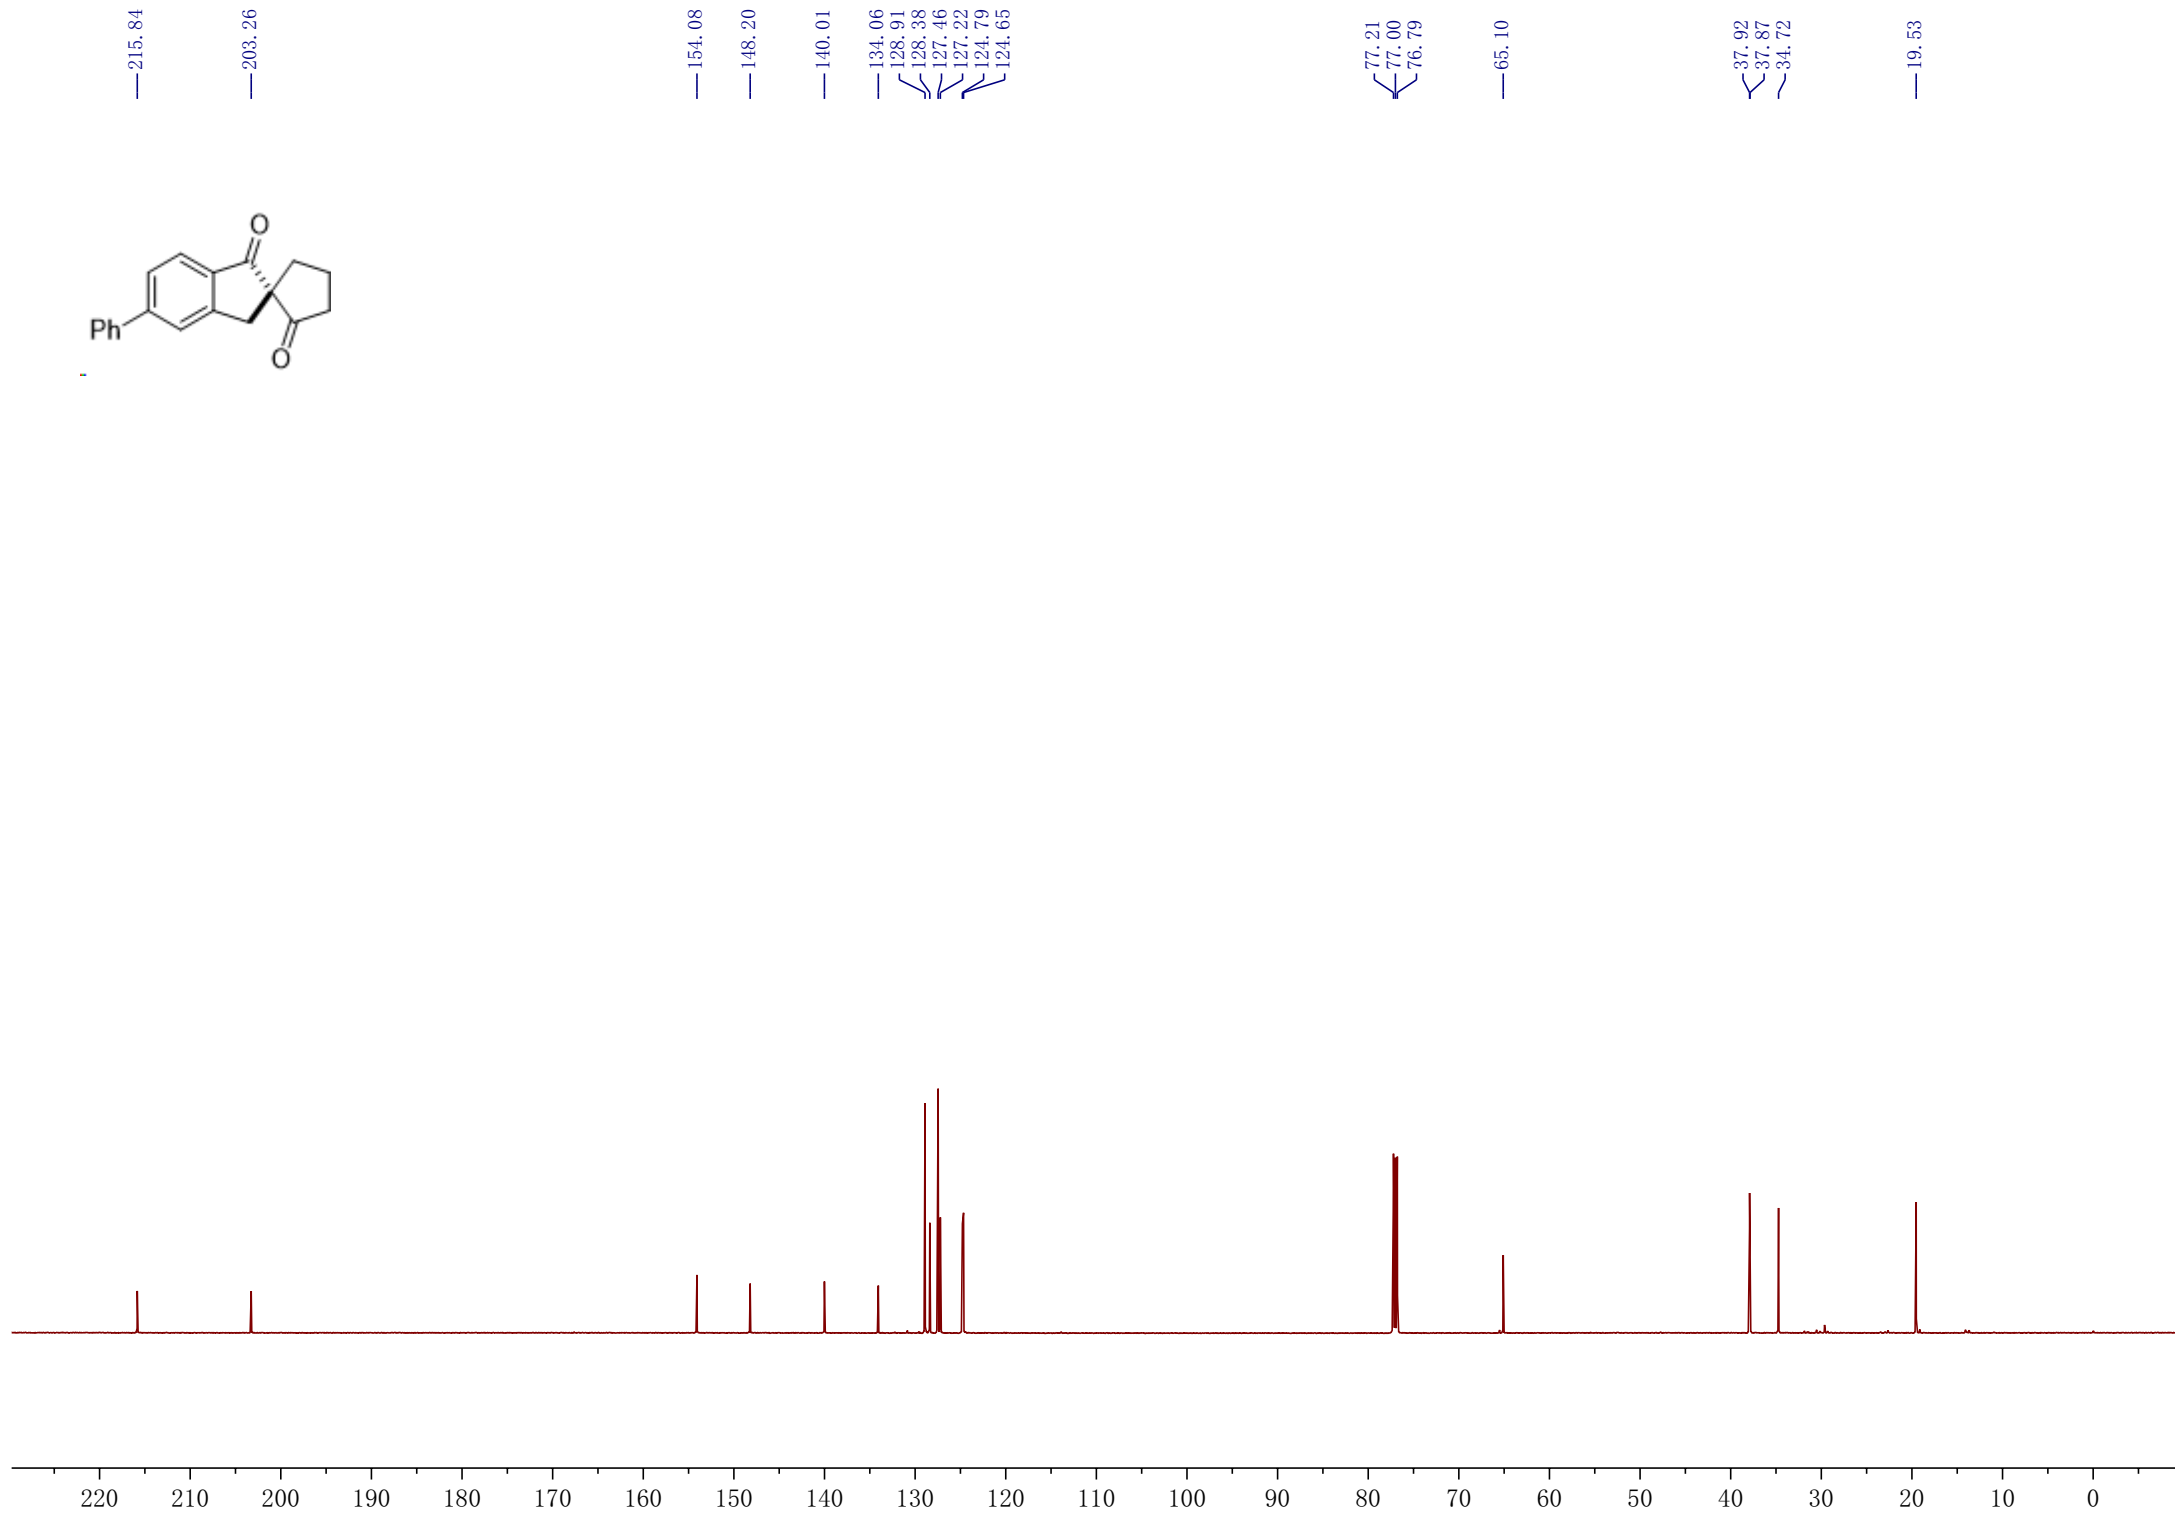

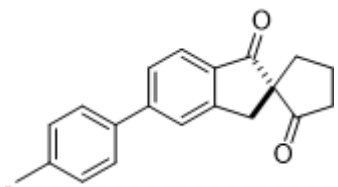

7.75  
7.74  
7.63  
7.59  
7.58  
7.52  
7.51  
7.28  
7.27  
7.25

3.55  
3.52  
2.97  
2.94  
2.64  
2.63  
2.62  
2.61  
2.60  
2.59  
2.59  
2.58  
2.58  
2.57  
2.56  
2.56  
2.49  
2.48  
2.47  
2.47  
2.46  
2.46  
2.45  
2.45  
2.45  
2.44  
2.44  
2.43  
2.42  
2.41  
2.41  
2.39  
2.38  
2.37  
2.36  
2.36  
2.35  
2.35  
2.11  
2.10  
2.09  
2.09  
2.08  
2.07  
2.06  
2.05  
2.05  
2.04  
2.04  
2.04  
2.03  
2.03  
2.03  
2.02  
2.02  
2.01  
-0.00

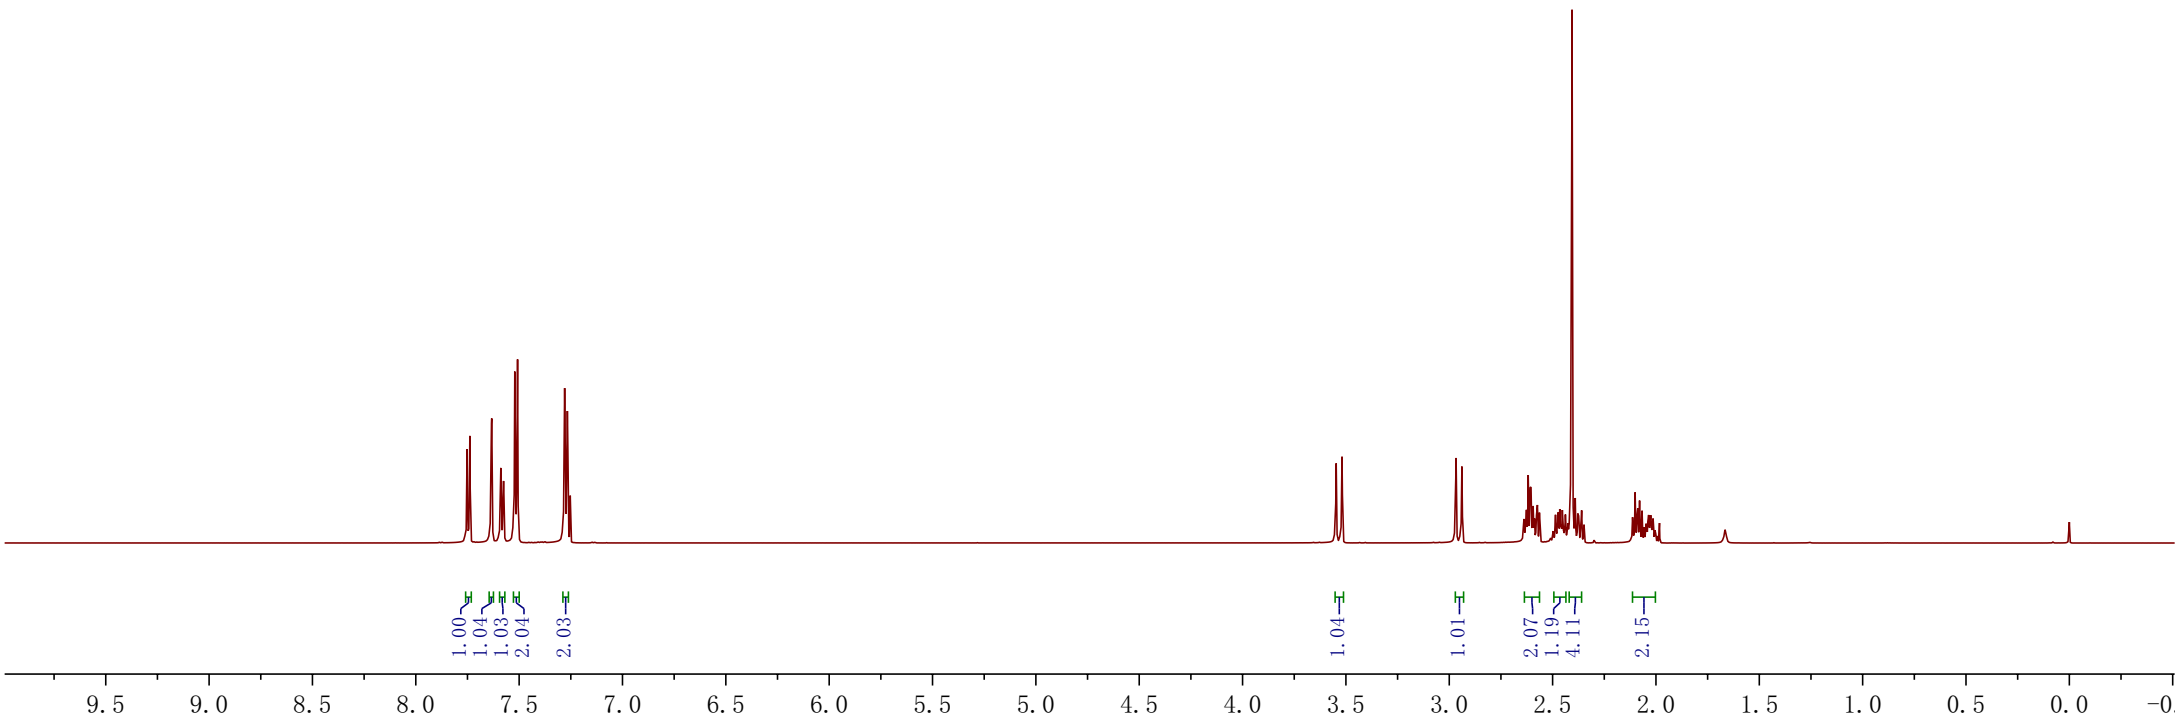

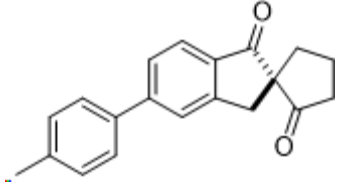

— 215.89

— 203.23

— 154.09

— 148.14

— 138.43

— 137.06

— 133.81

— 129.64

— 127.29

— 126.98

— 124.75

— 124.32

— 77.21

— 77.00

— 76.79

— 65.07

— 37.91

— 37.86

— 34.72

— 21.12

— 19.52

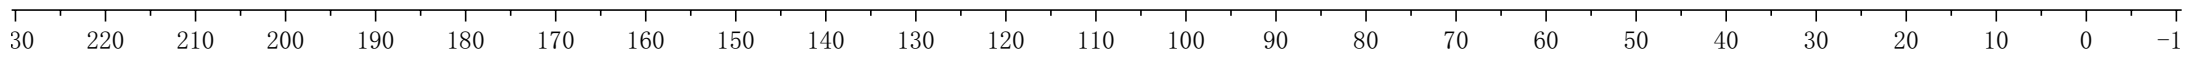

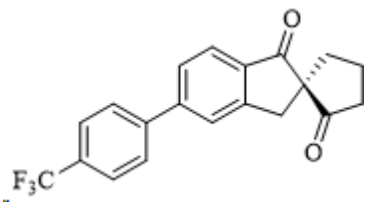

7.80  
7.78  
7.74  
7.72  
7.72  
7.70  
7.66  
7.60  
7.58

3.58  
3.54  
3.01  
2.97  
2.65  
2.65  
2.63  
2.62  
2.62  
2.60  
2.60  
2.58  
2.58  
2.57  
2.57  
2.56  
2.51  
2.50  
2.49  
2.48  
2.48  
2.47  
2.47  
2.46  
2.45  
2.44  
2.43  
2.43  
2.42  
2.41  
2.39  
2.39  
2.39  
2.37  
2.36  
2.15  
2.13  
2.12  
2.11  
2.10  
2.09  
2.08  
2.08  
2.07  
2.06  
2.05  
2.04  
2.04  
2.03  
2.02  
0.00

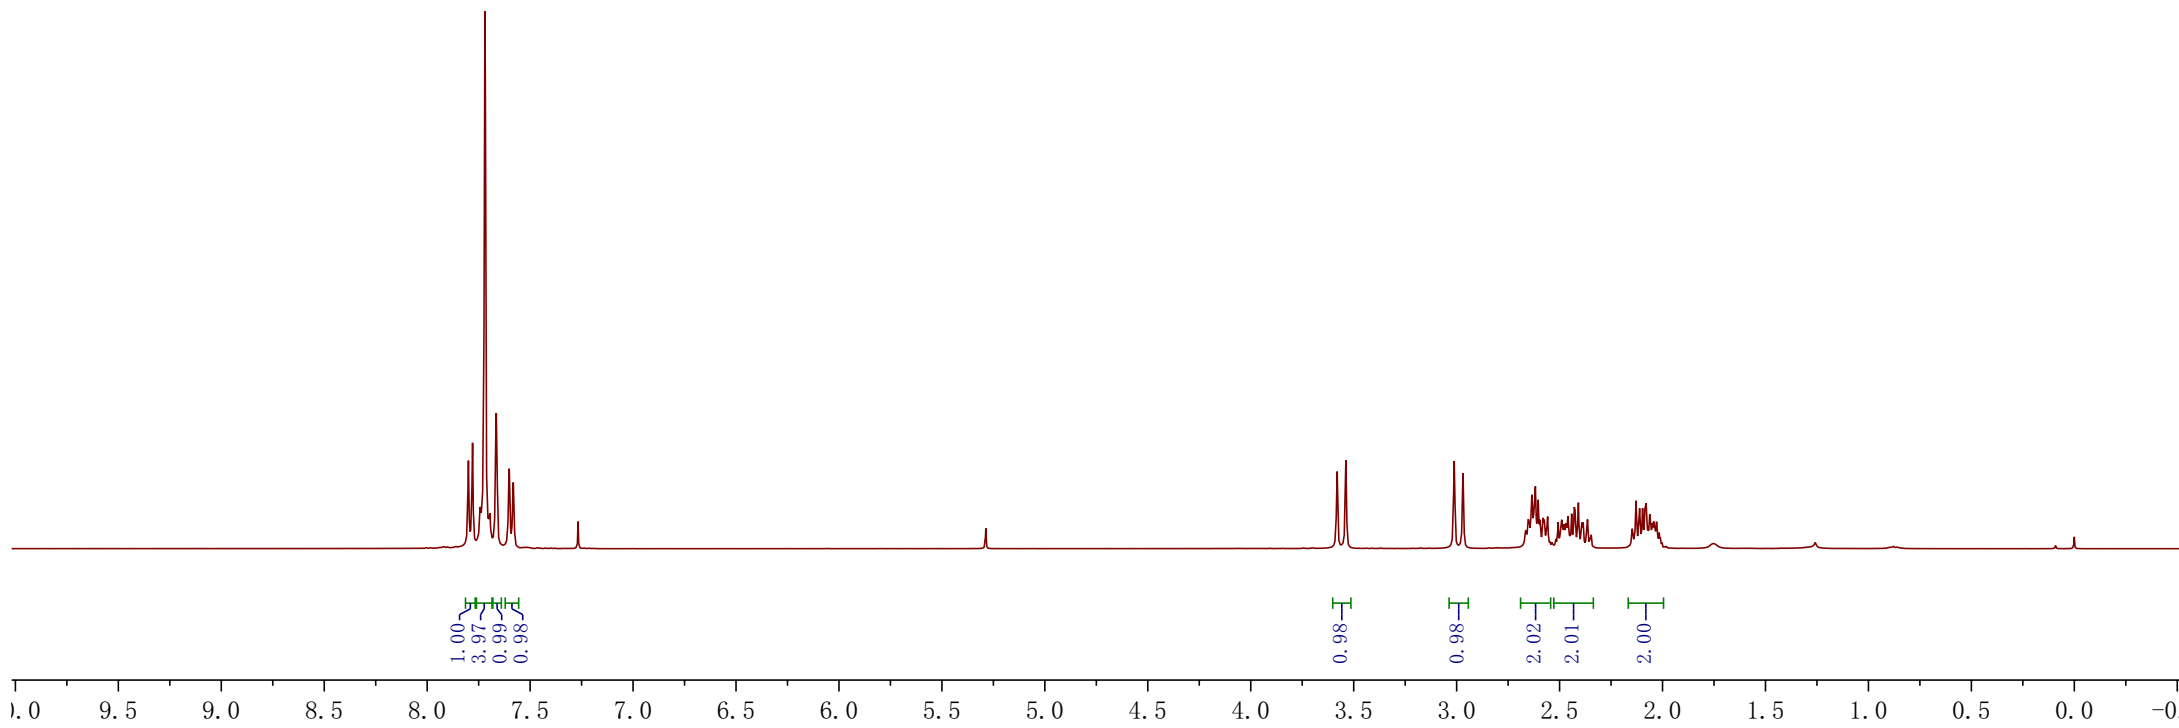



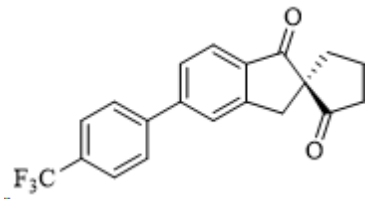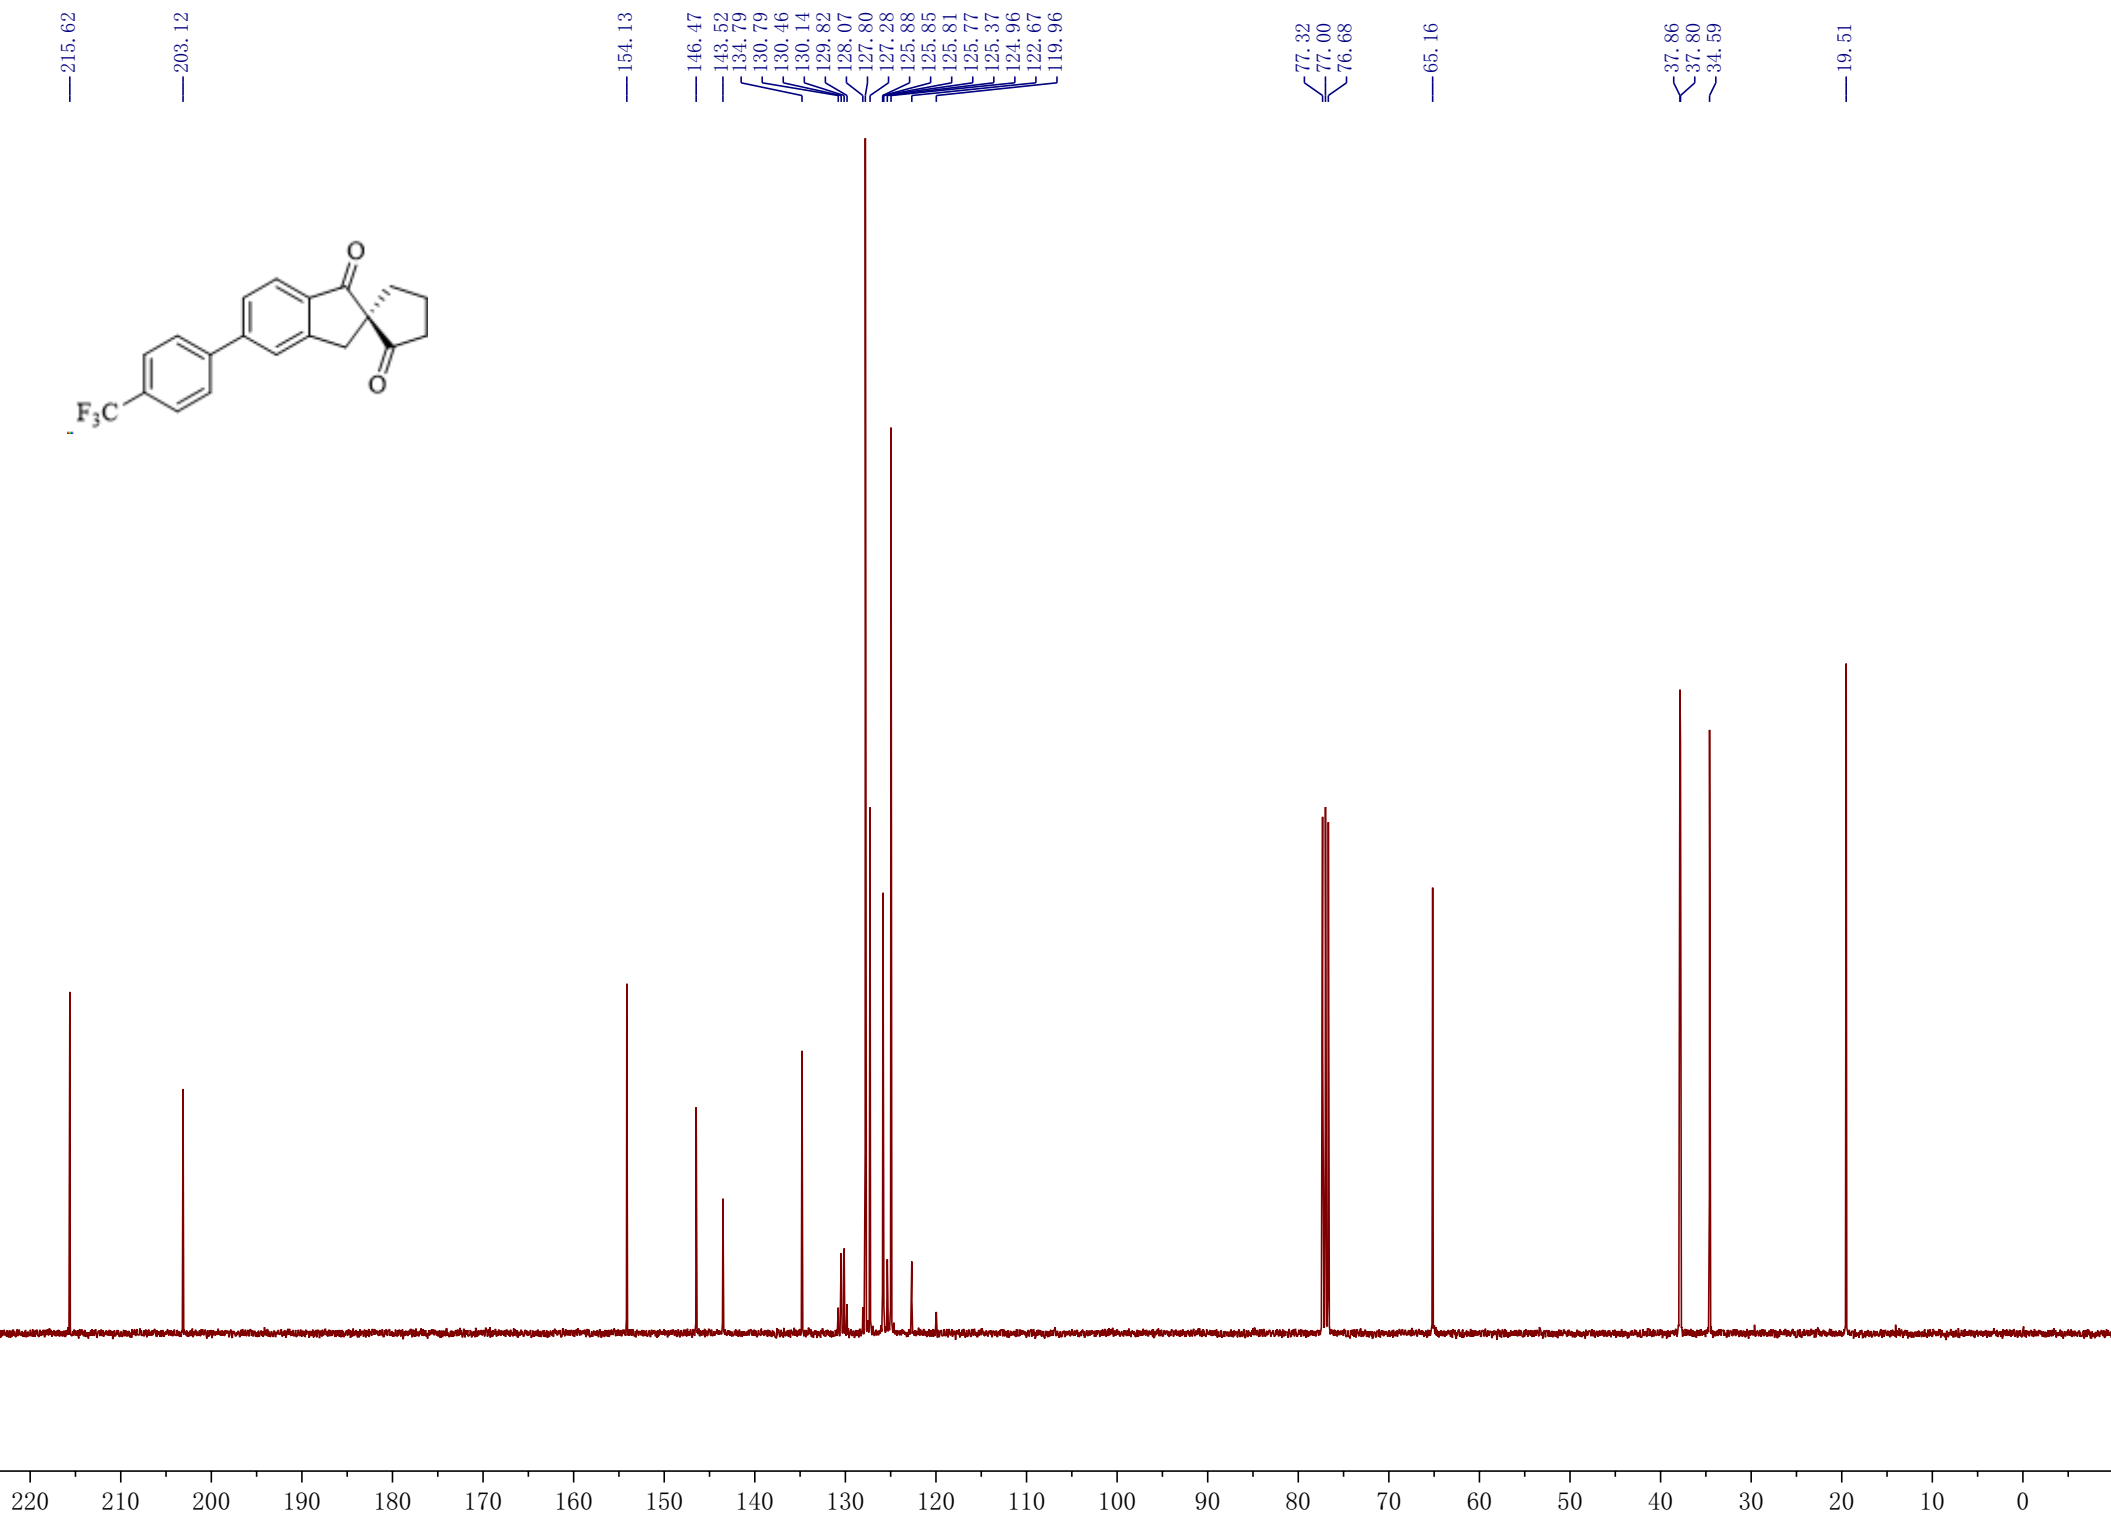

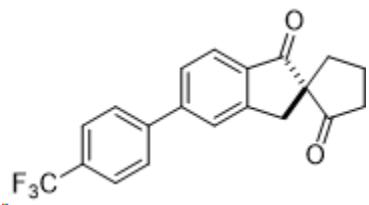

— 62.52

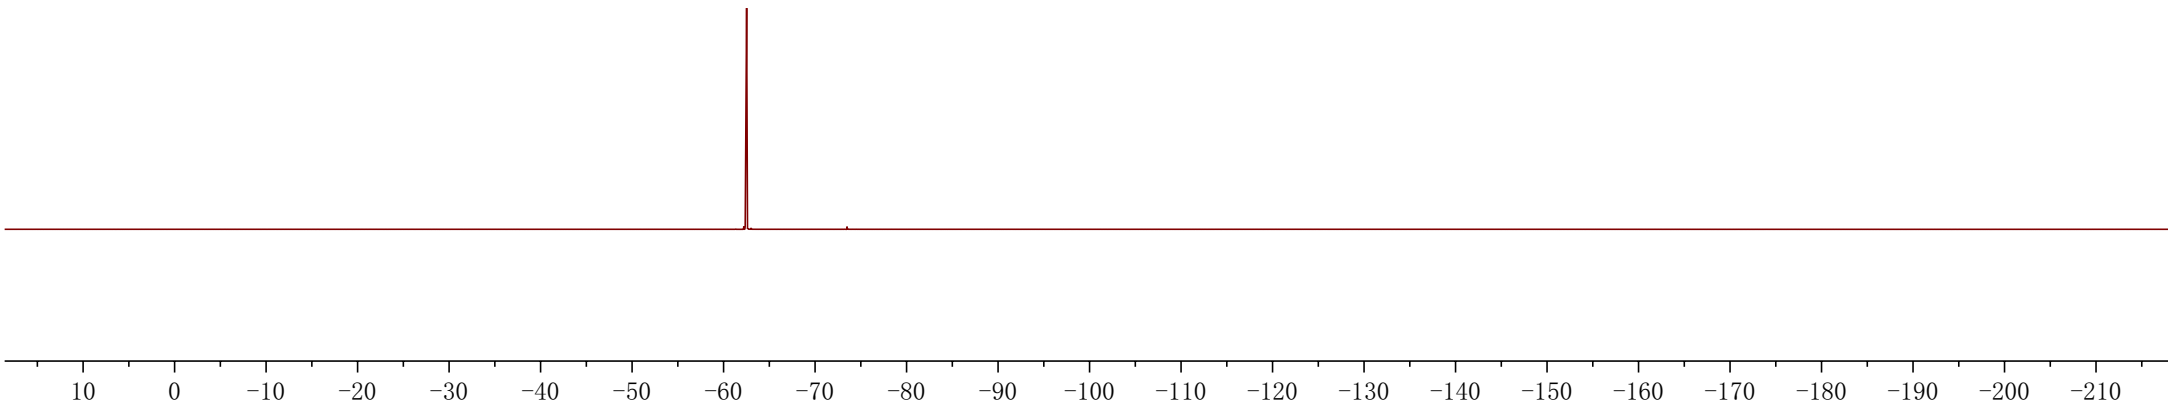

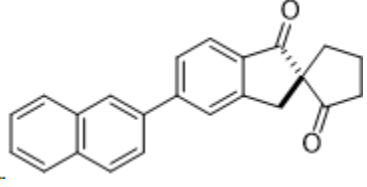

8.07  
7.94  
7.92  
7.91  
7.90  
7.88  
7.87  
7.86  
7.81  
7.79  
7.77  
7.74  
7.74  
7.73  
7.72  
7.72  
7.71  
7.53  
7.53  
7.52  
7.51  
7.25

3.59  
3.55  
3.00  
2.96  
2.67  
2.66  
2.65  
2.64  
2.63  
2.62  
2.61  
2.60  
2.59  
2.58  
2.57  
2.51  
2.49  
2.48  
2.47  
2.46  
2.44  
2.43  
2.41  
2.39  
2.38  
2.36  
2.14  
2.12  
2.10  
2.09  
2.08  
2.07  
2.06  
2.05  
2.04  
2.03  
2.02  
-0.00

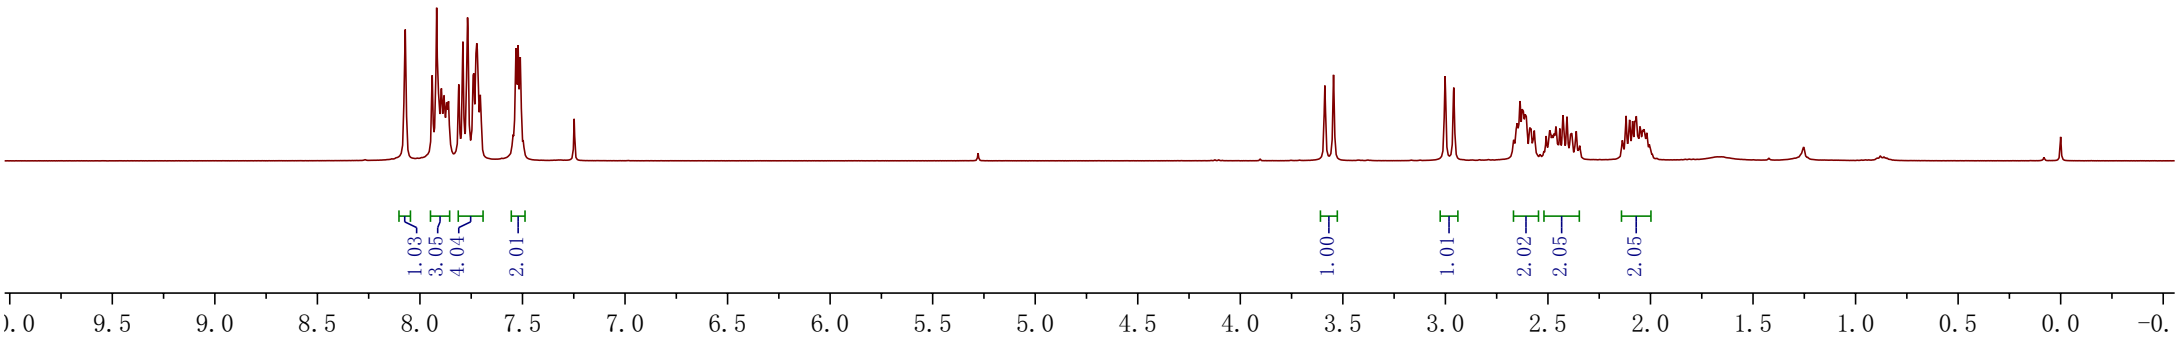

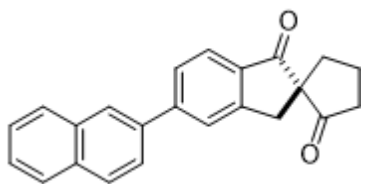

— 215.85

— 203.27

— 154.15

— 148.11

137.29

134.10

133.45

133.05

128.70

128.35

127.65

127.46

126.72

126.57

125.26

124.89

124.87

77.32

77.00

76.68

— 65.17

37.94

37.91

34.73

— 19.55

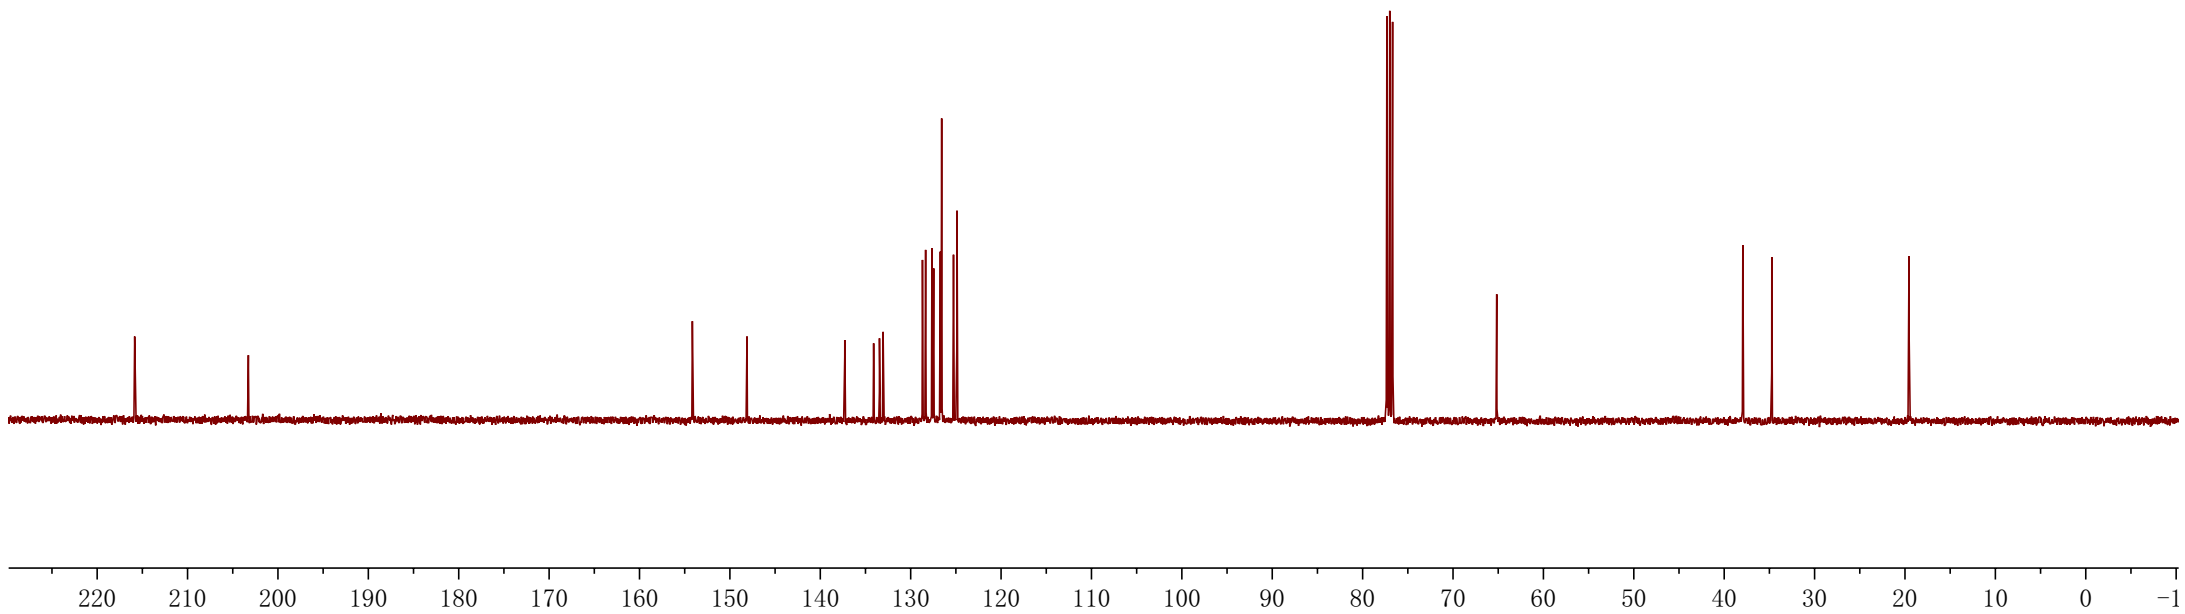

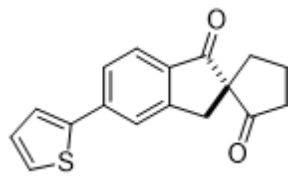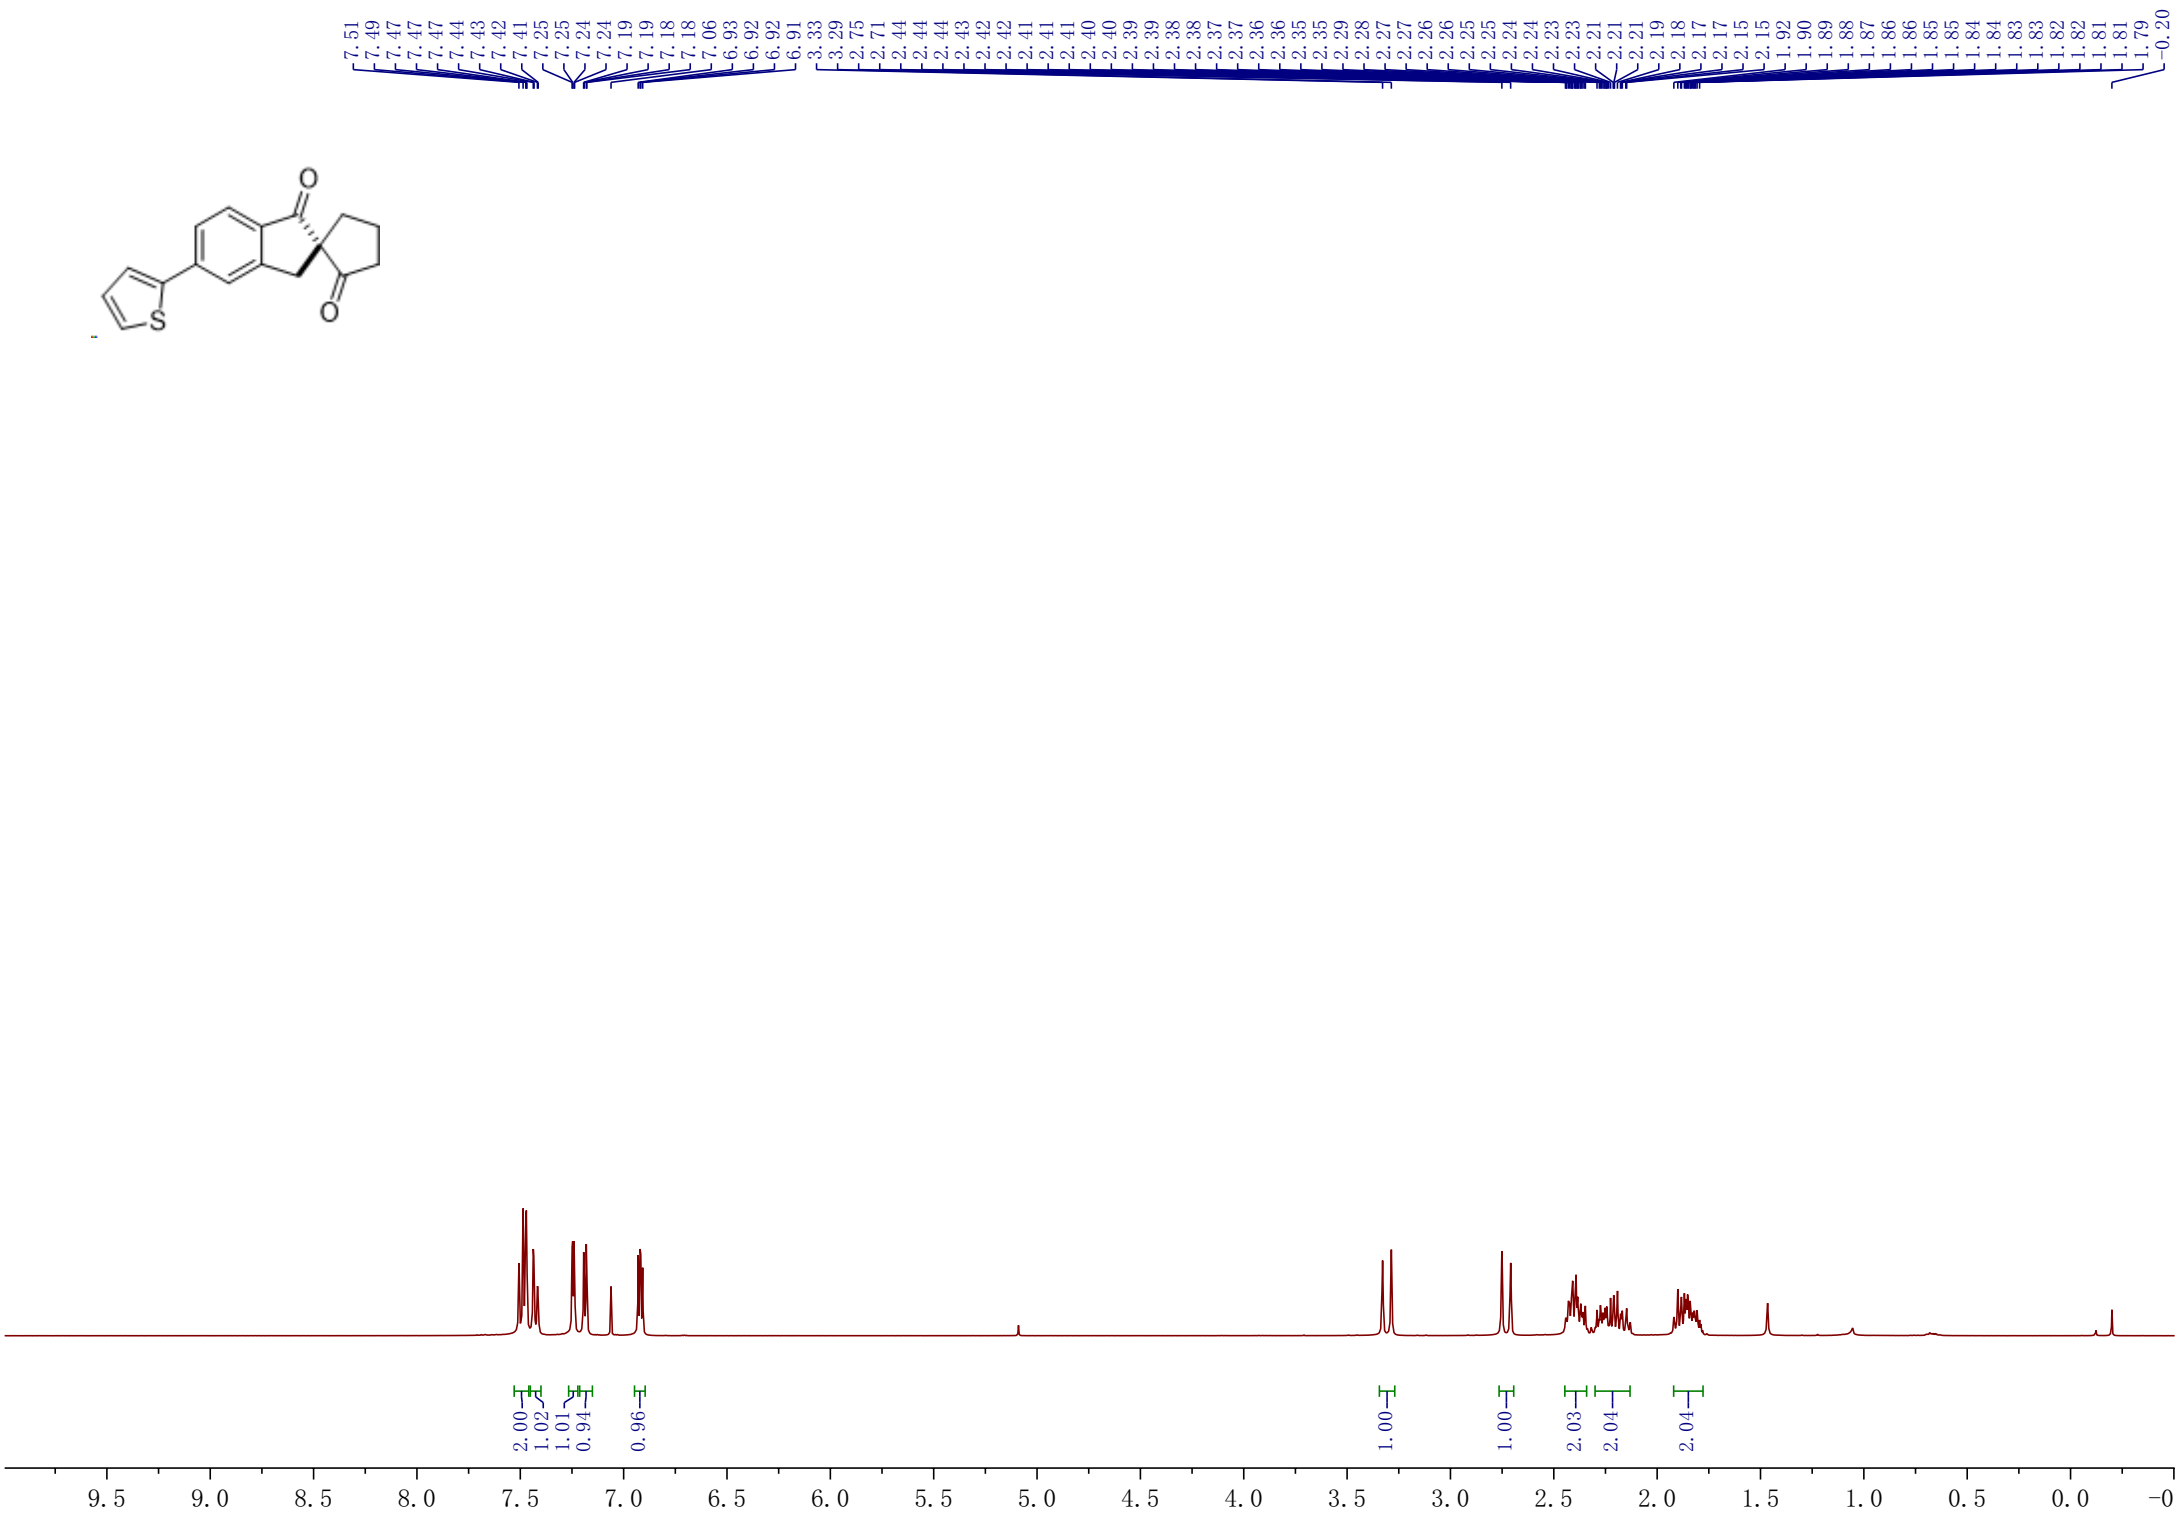

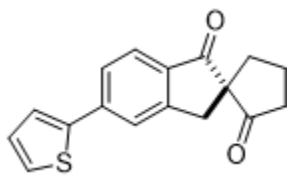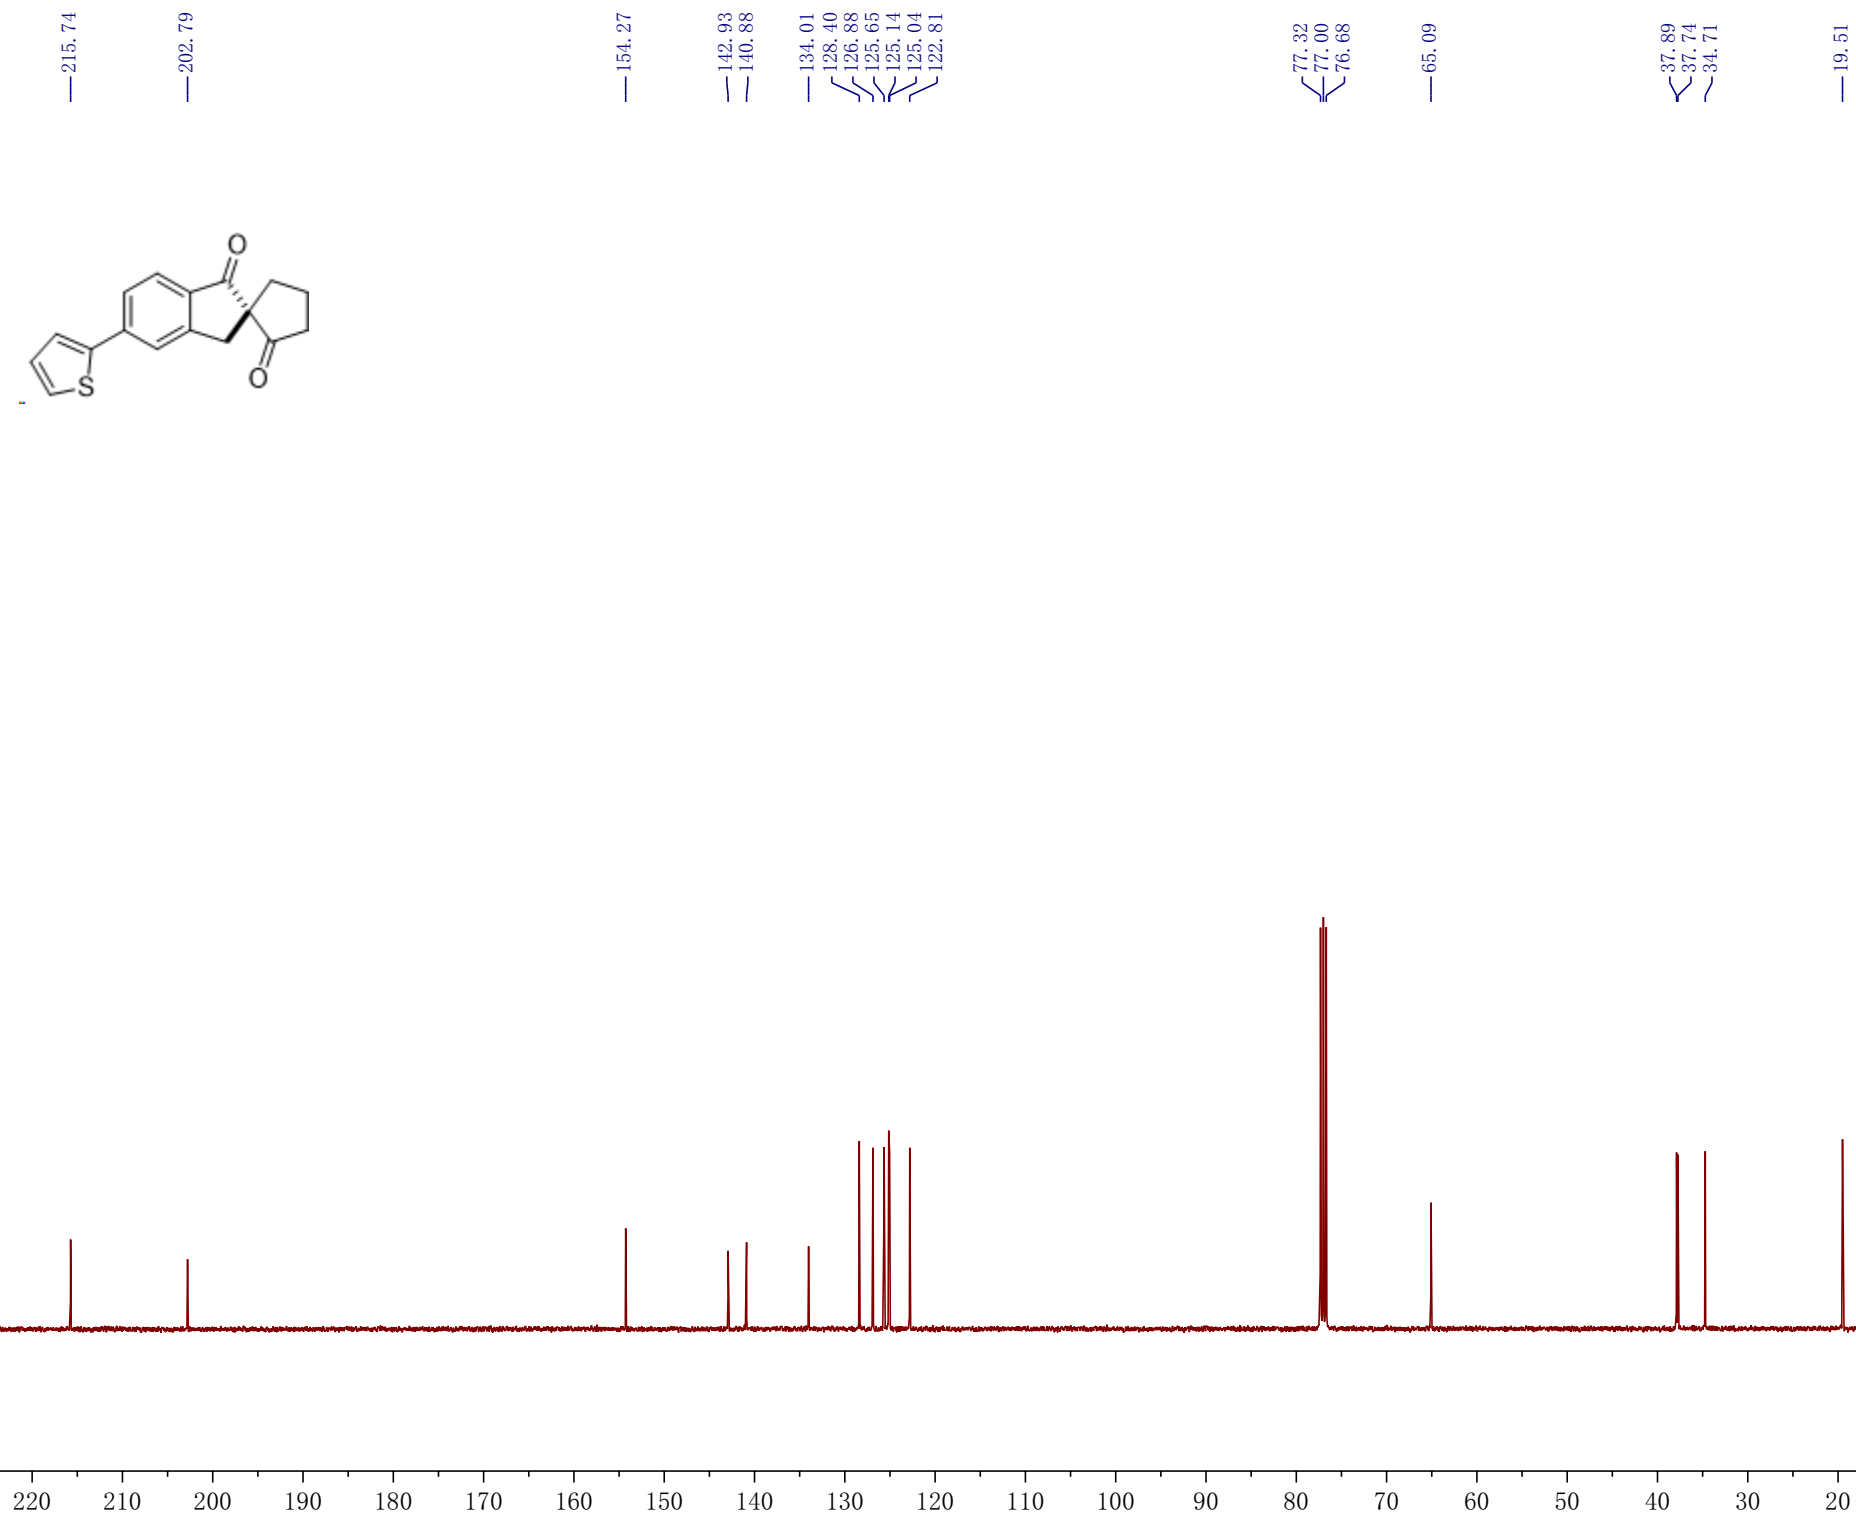

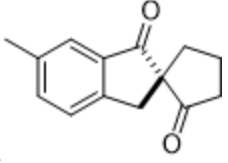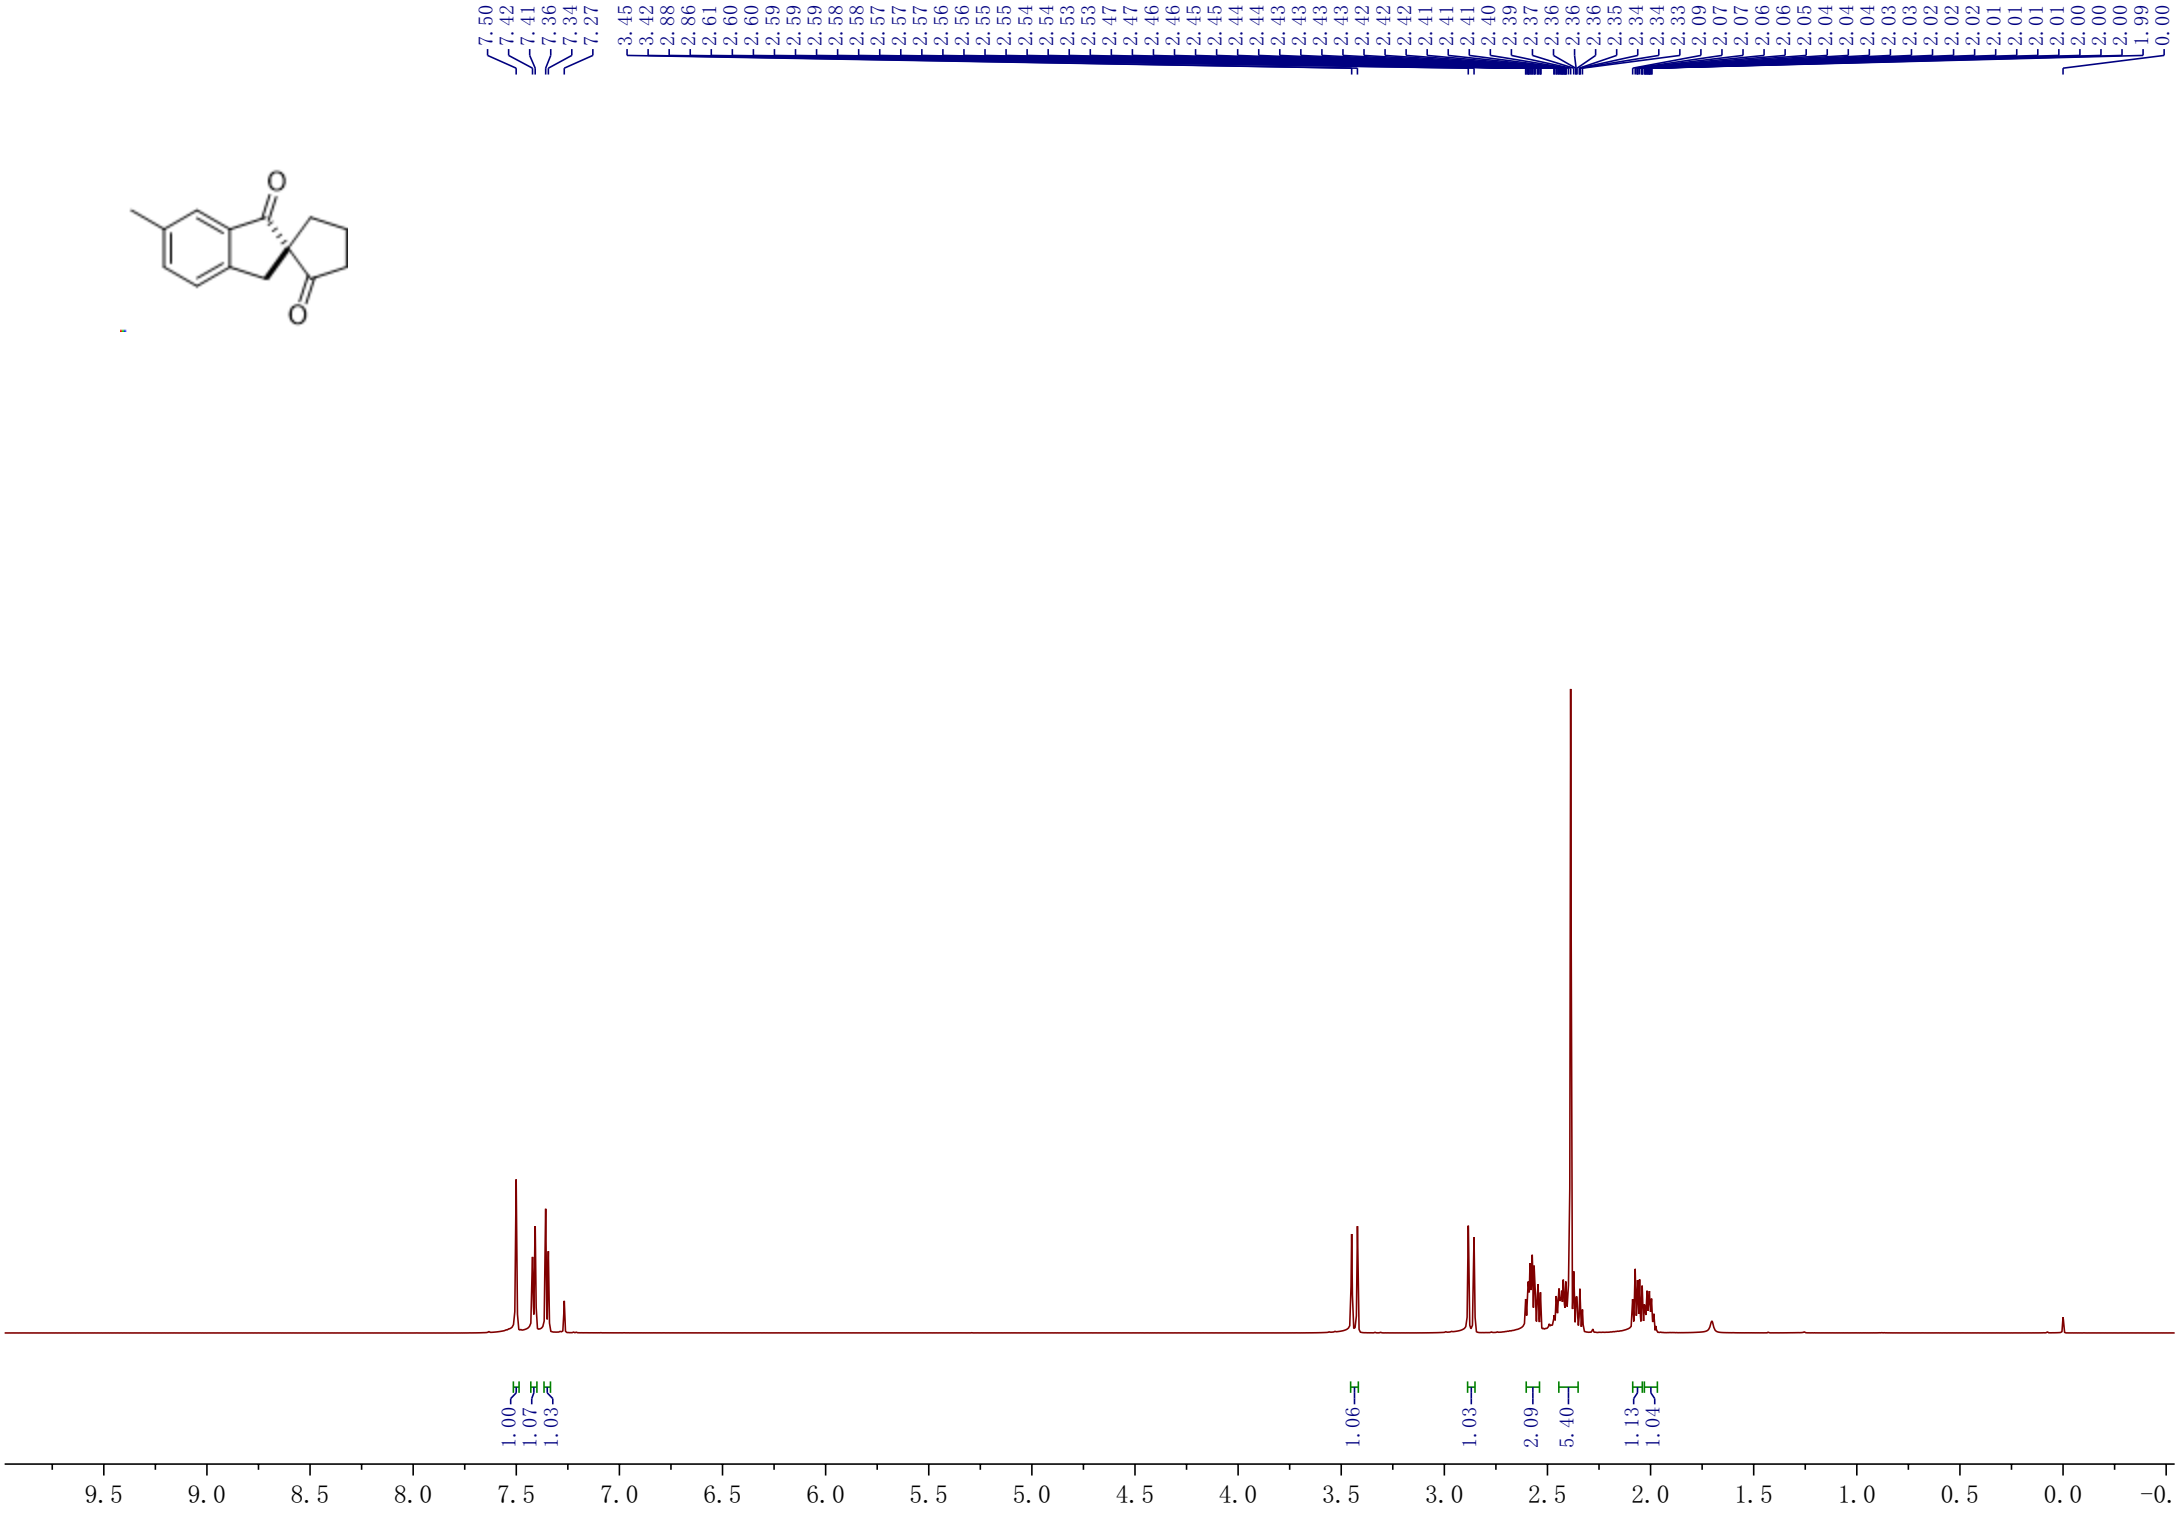

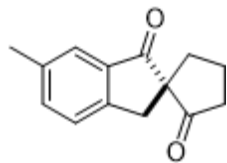

— 215.92

— 203.87

— 150.87

— 137.75  
— 136.40  
— 135.46

— 125.88  
— 124.36

— 77.39  
— 77.07  
— 76.76

— 65.17

— 37.98  
— 37.62  
— 34.72

— 21.05  
— 19.58

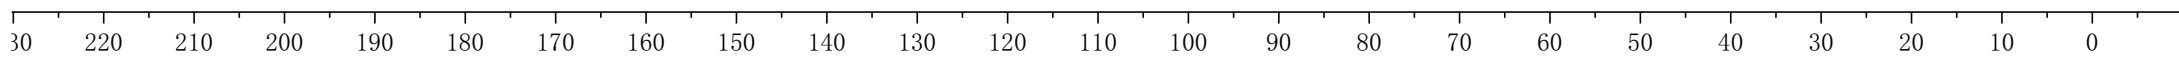



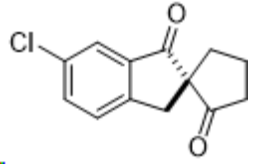

7.65  
7.65  
7.55  
7.55  
7.54  
7.54  
7.41  
7.40  
7.27

3.45  
3.43  
2.90  
2.87  
2.61  
2.60  
2.59  
2.58  
2.57  
2.56  
2.55  
2.55  
2.54  
2.54  
2.45  
2.45  
2.44  
2.44  
2.43  
2.43  
2.42  
2.42  
2.41  
2.40  
2.39  
2.38  
2.37  
2.36  
2.35  
2.35  
2.33  
2.33  
2.10  
2.08  
2.07  
2.07  
2.06  
2.05  
2.05  
2.04  
2.04  
2.03  
2.03  
2.02  
2.02  
2.01  
2.01  
2.01  
2.00  
1.99  
0.07  
-0.01

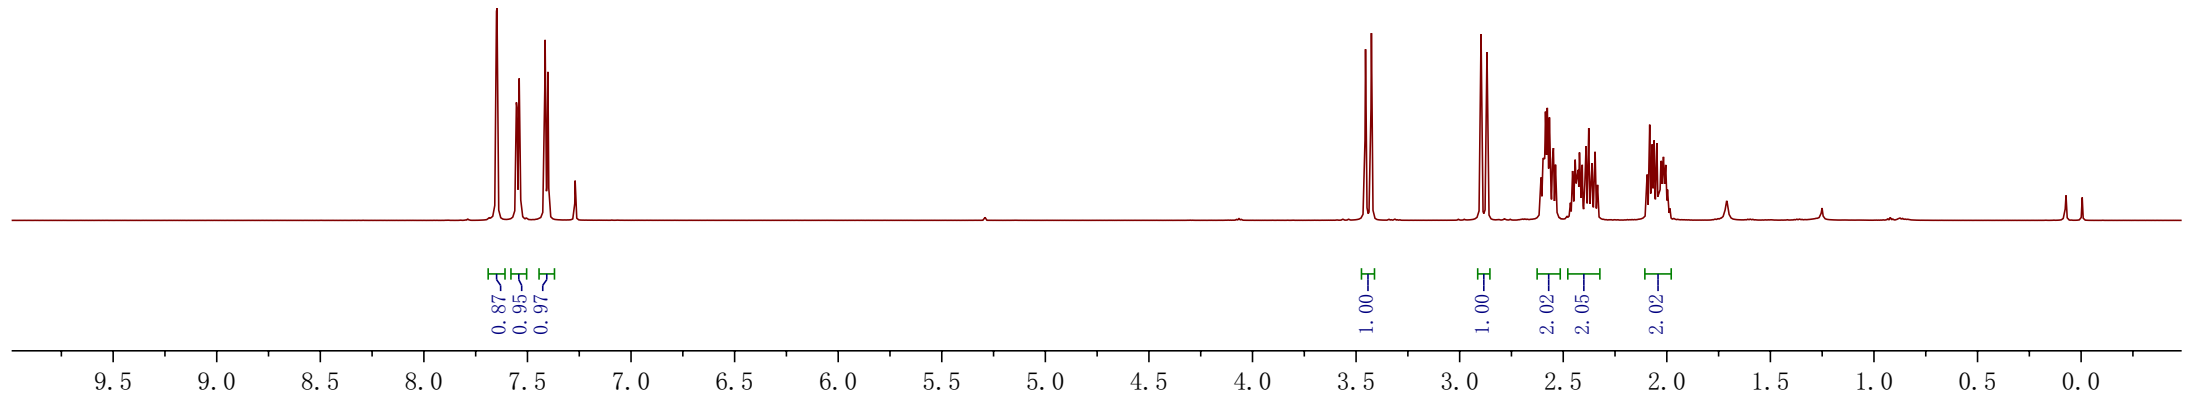

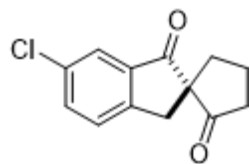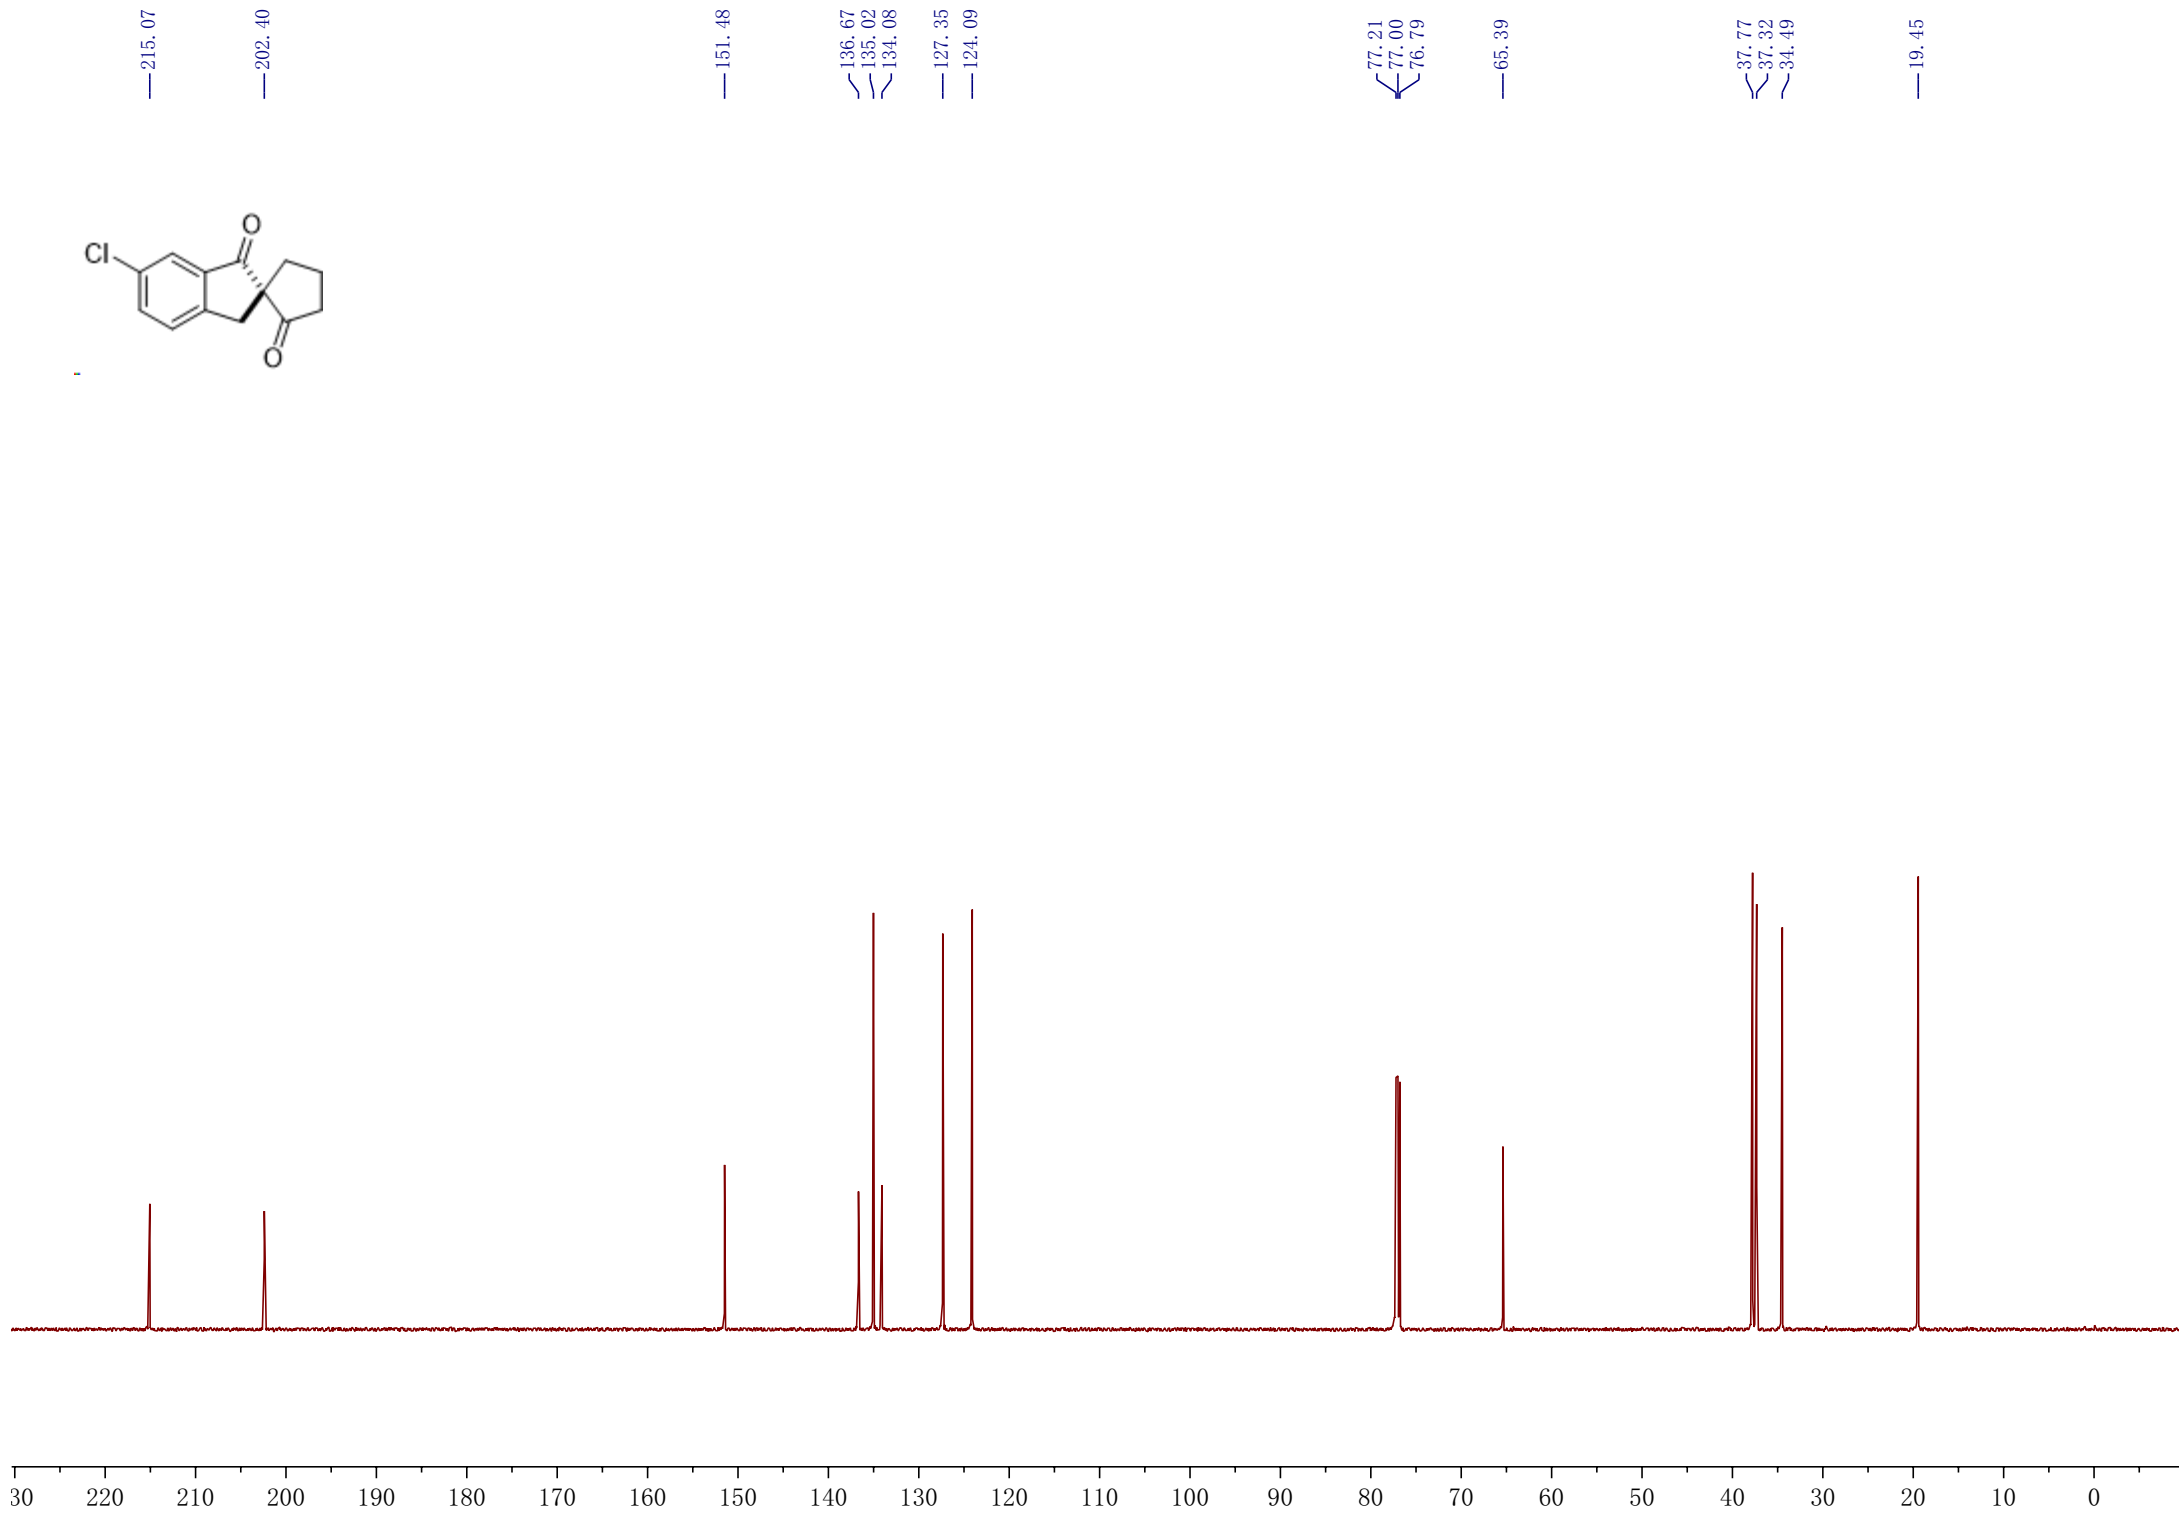

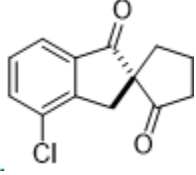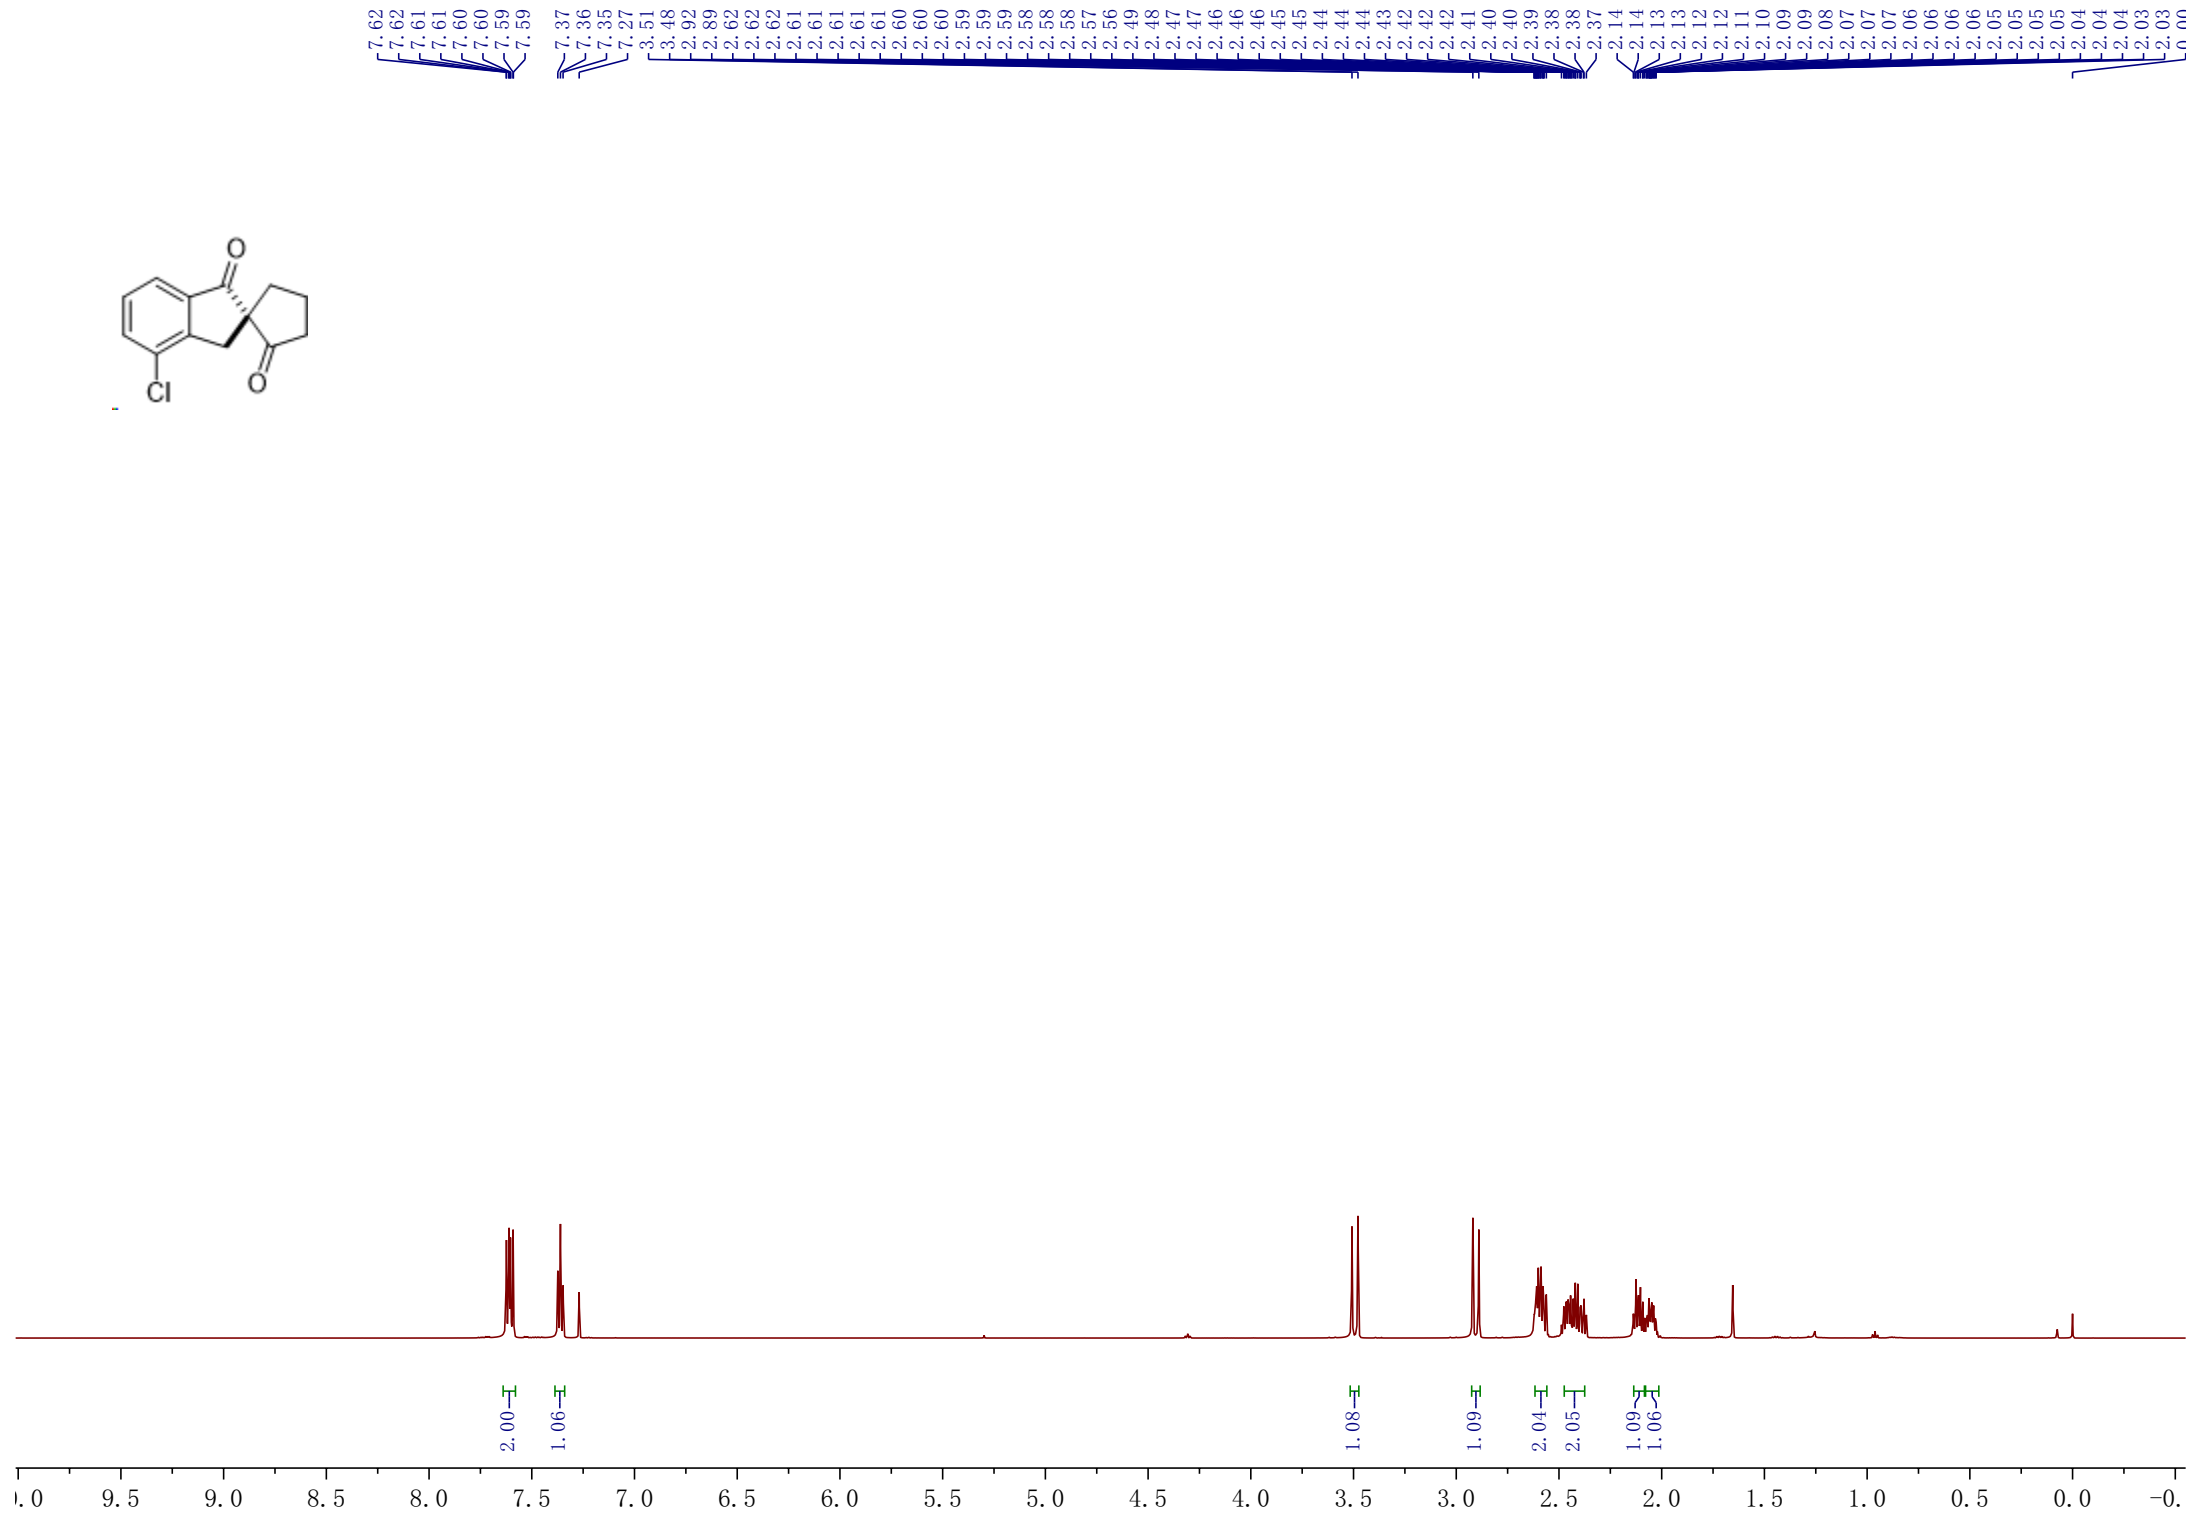

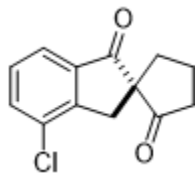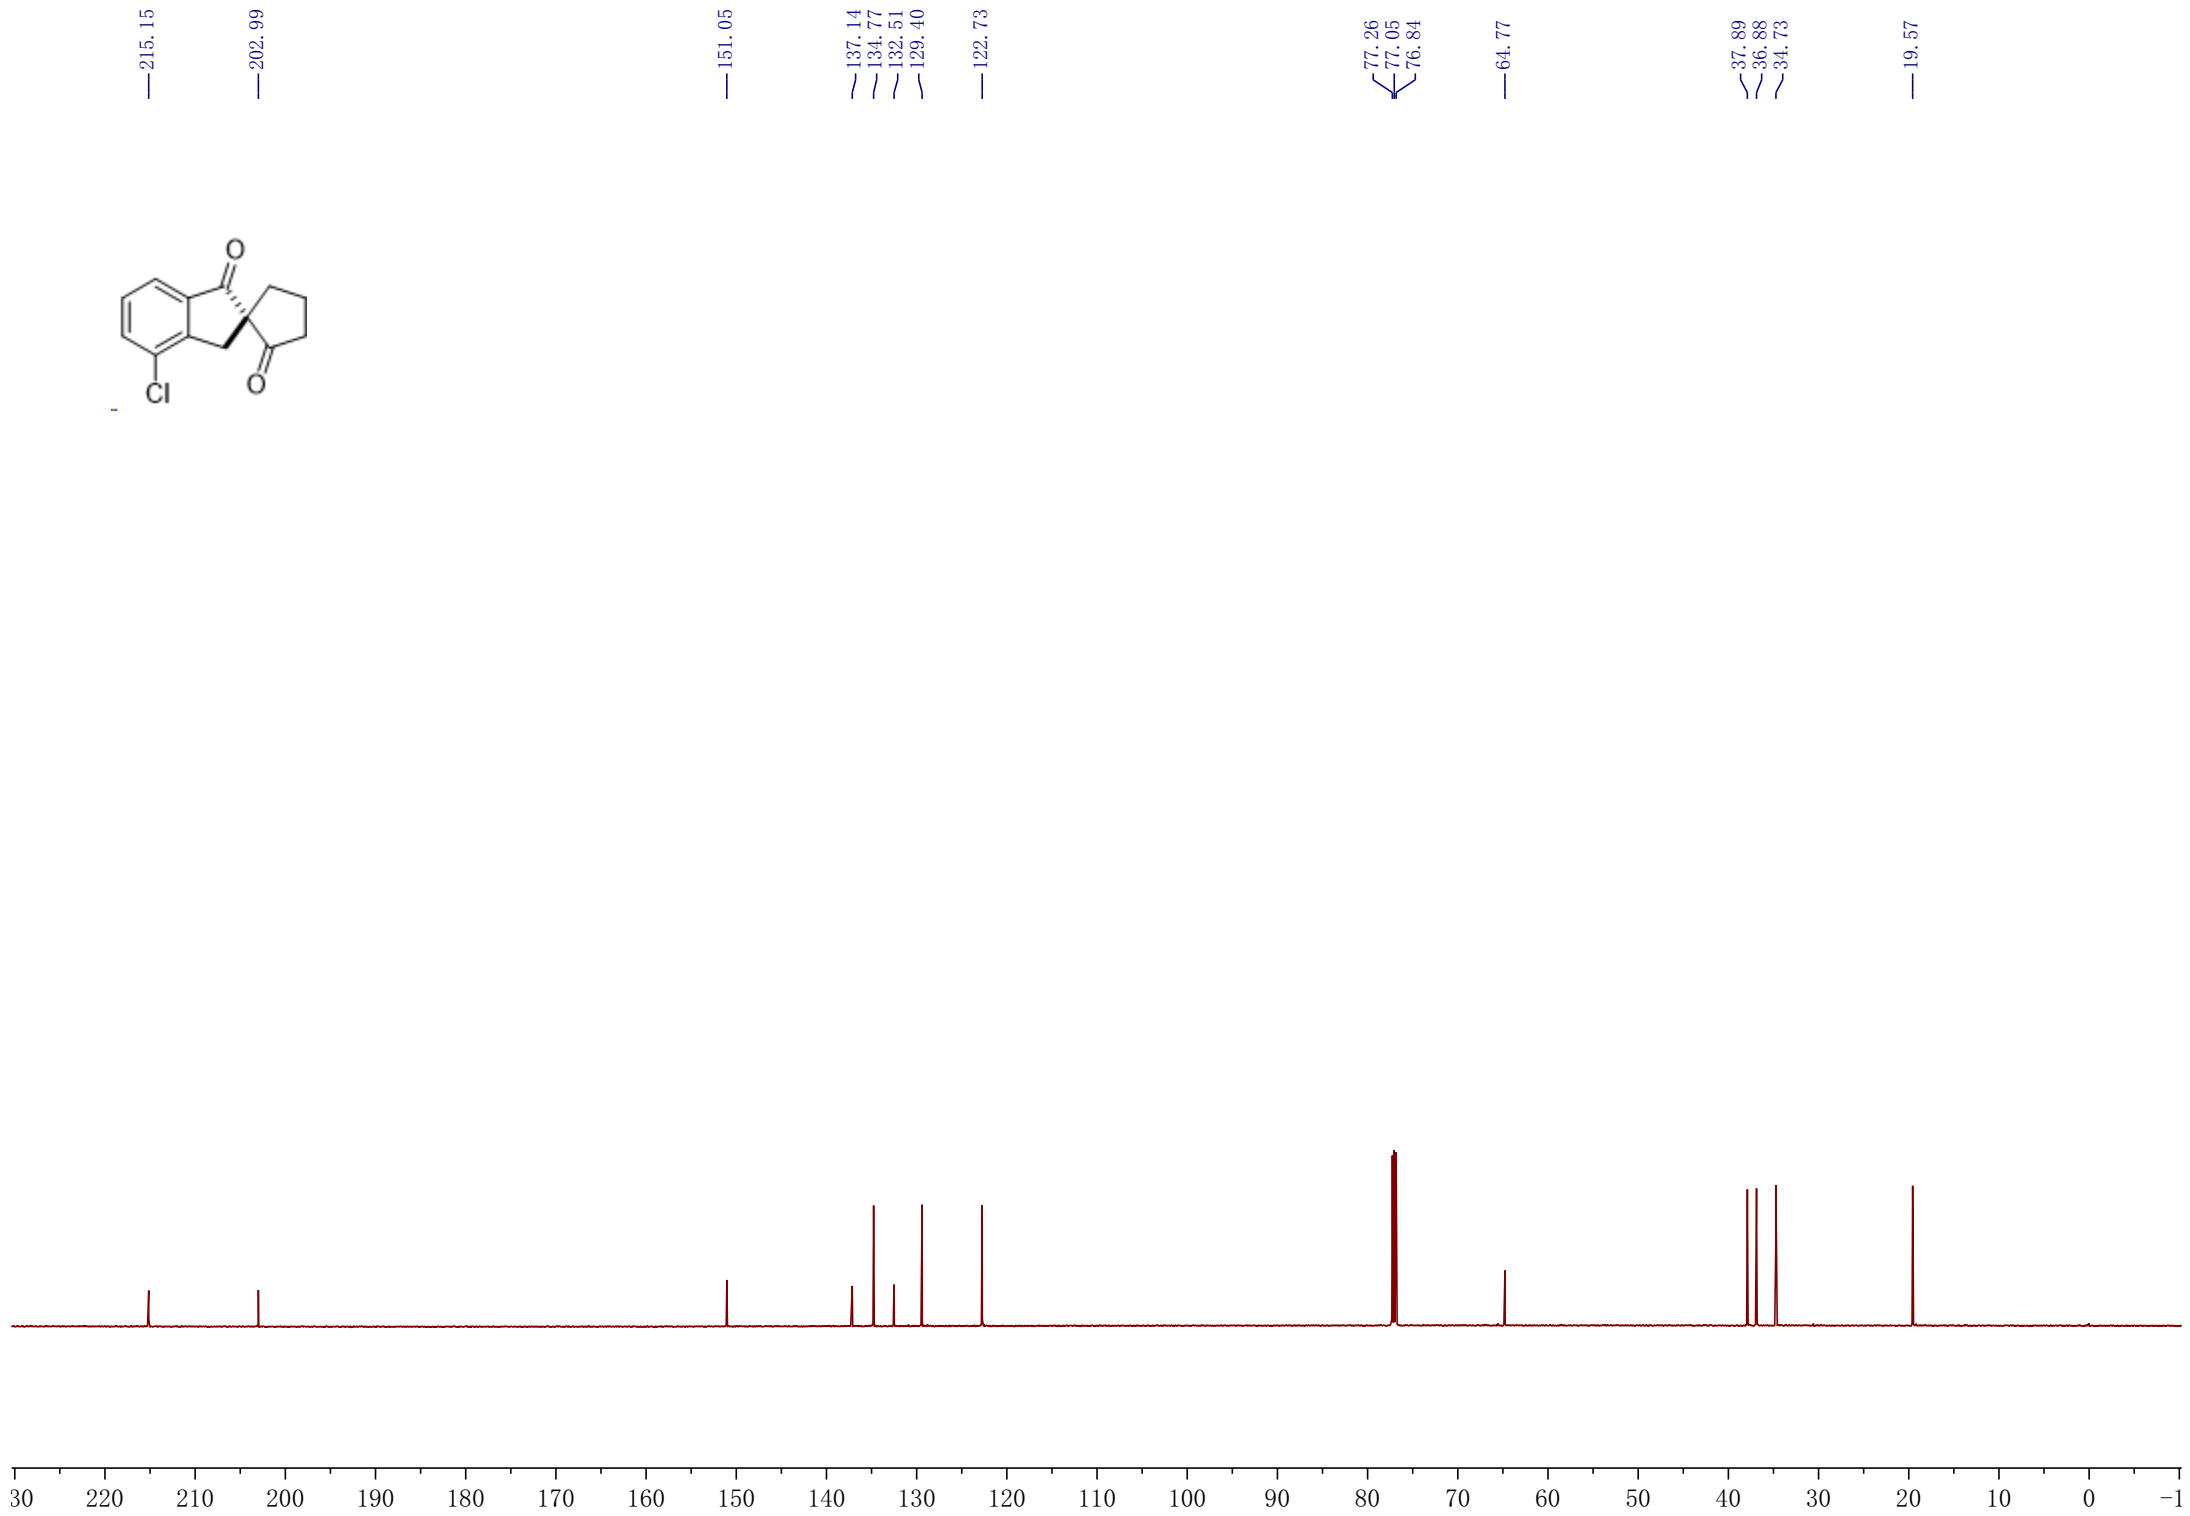

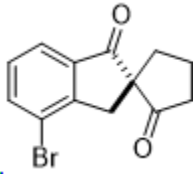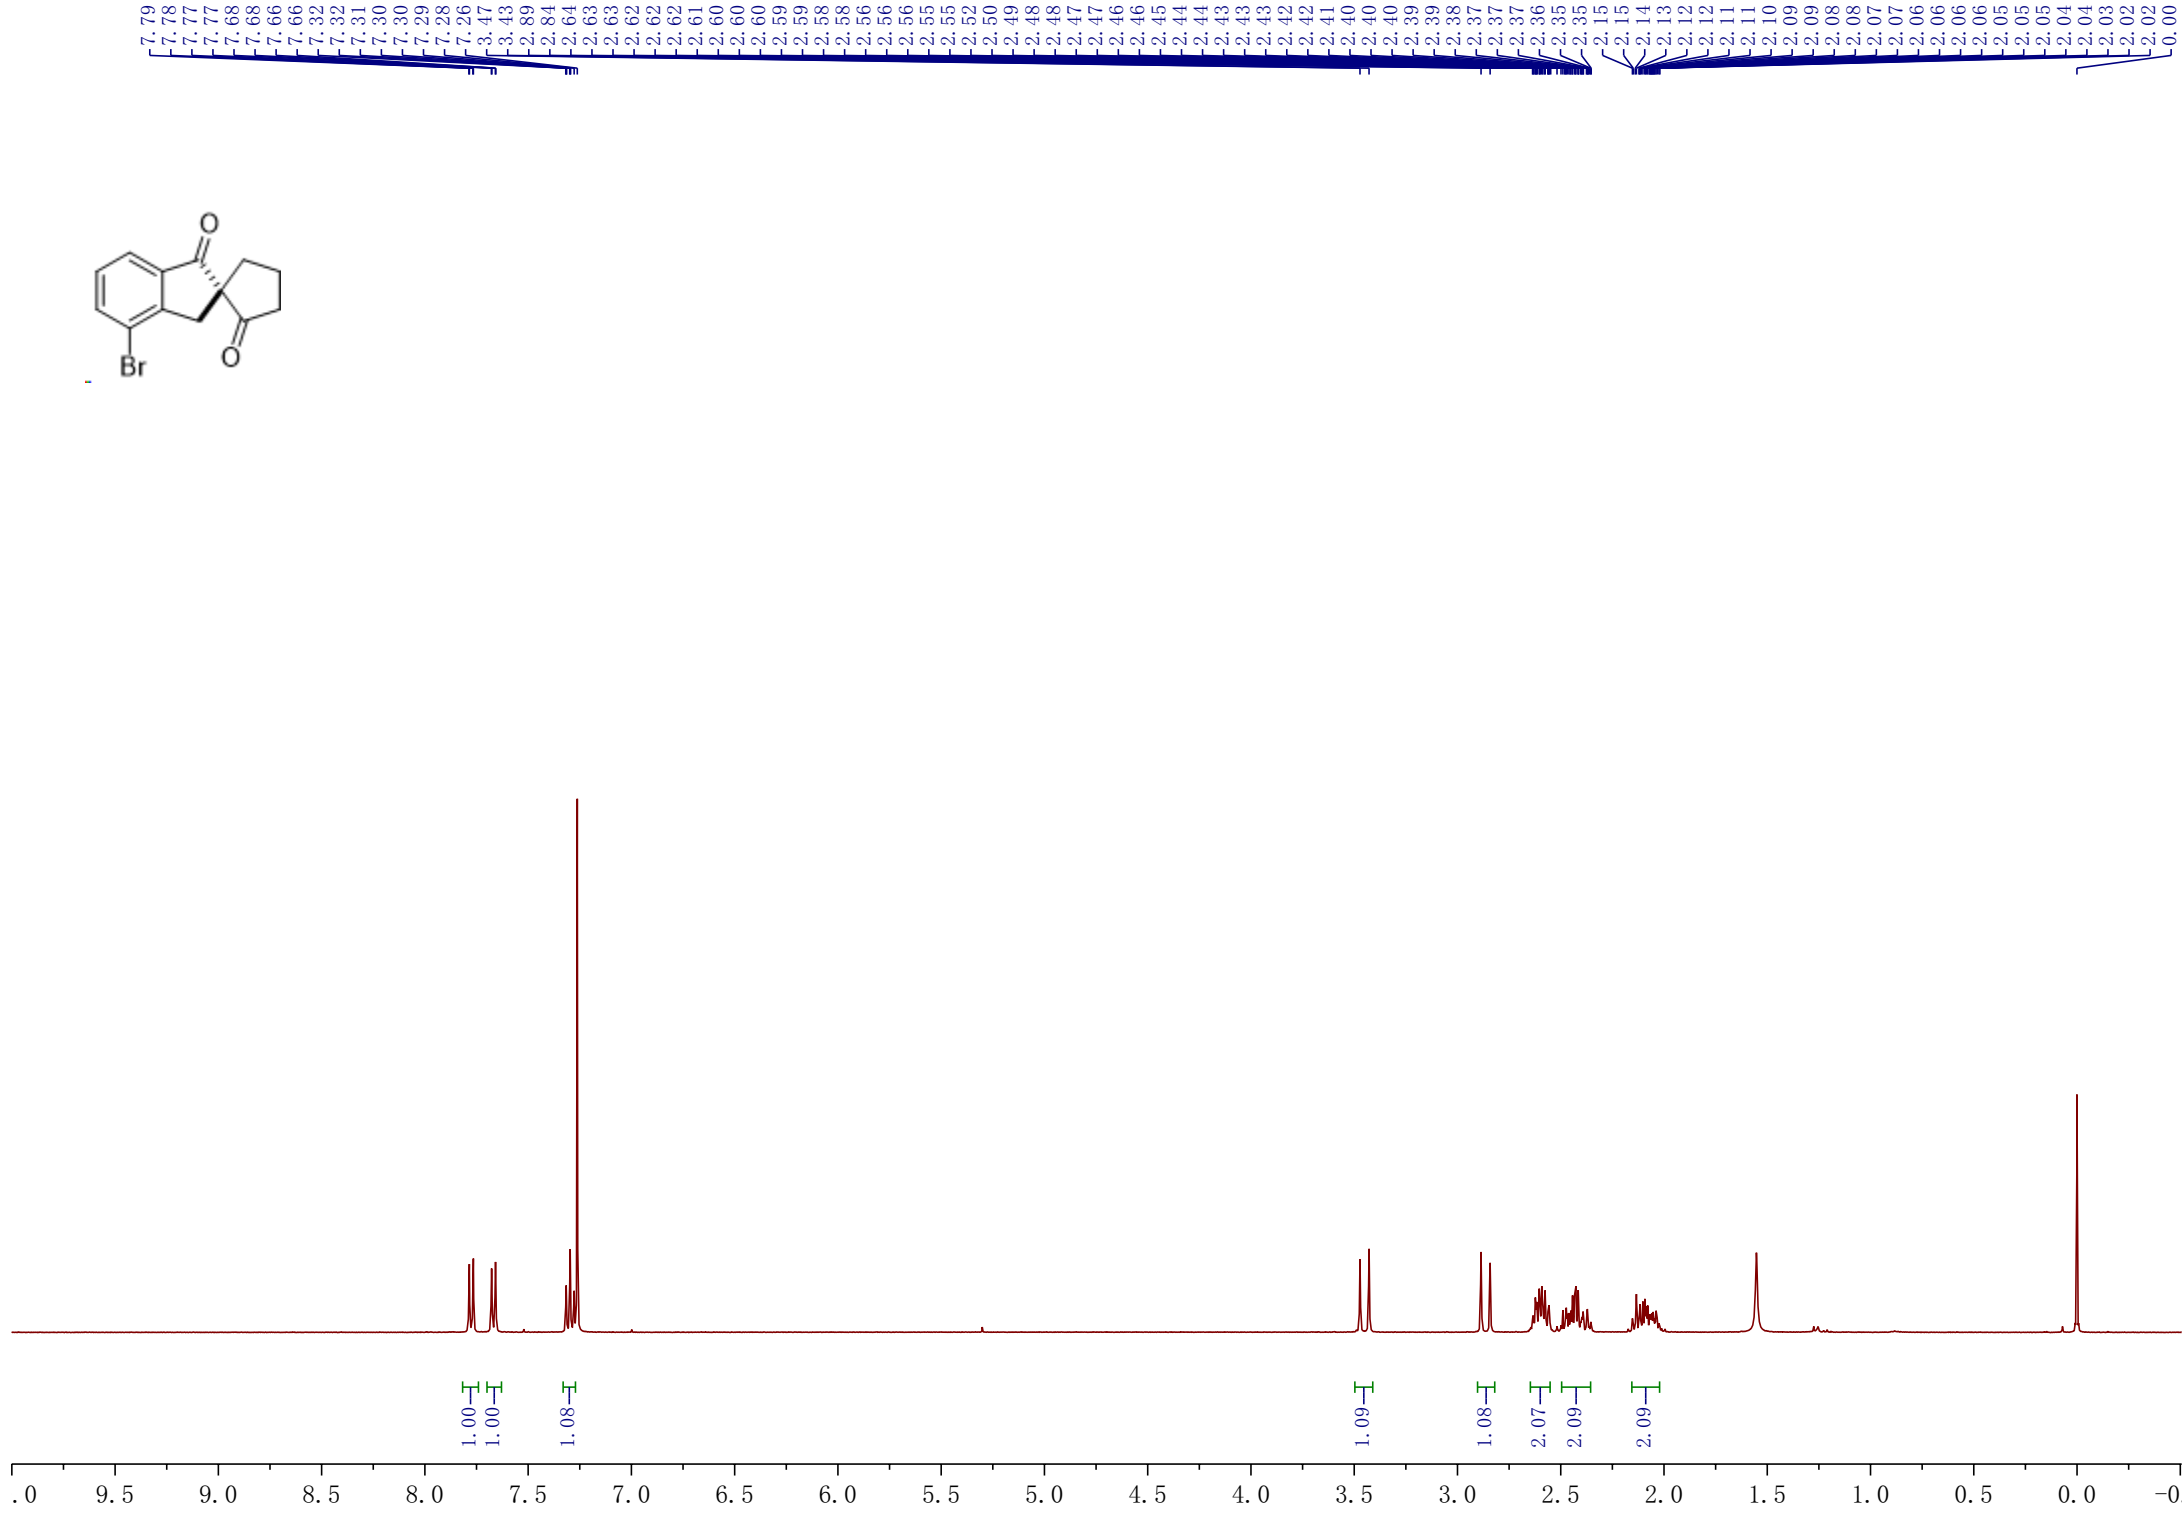

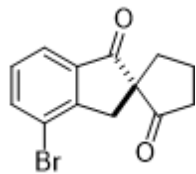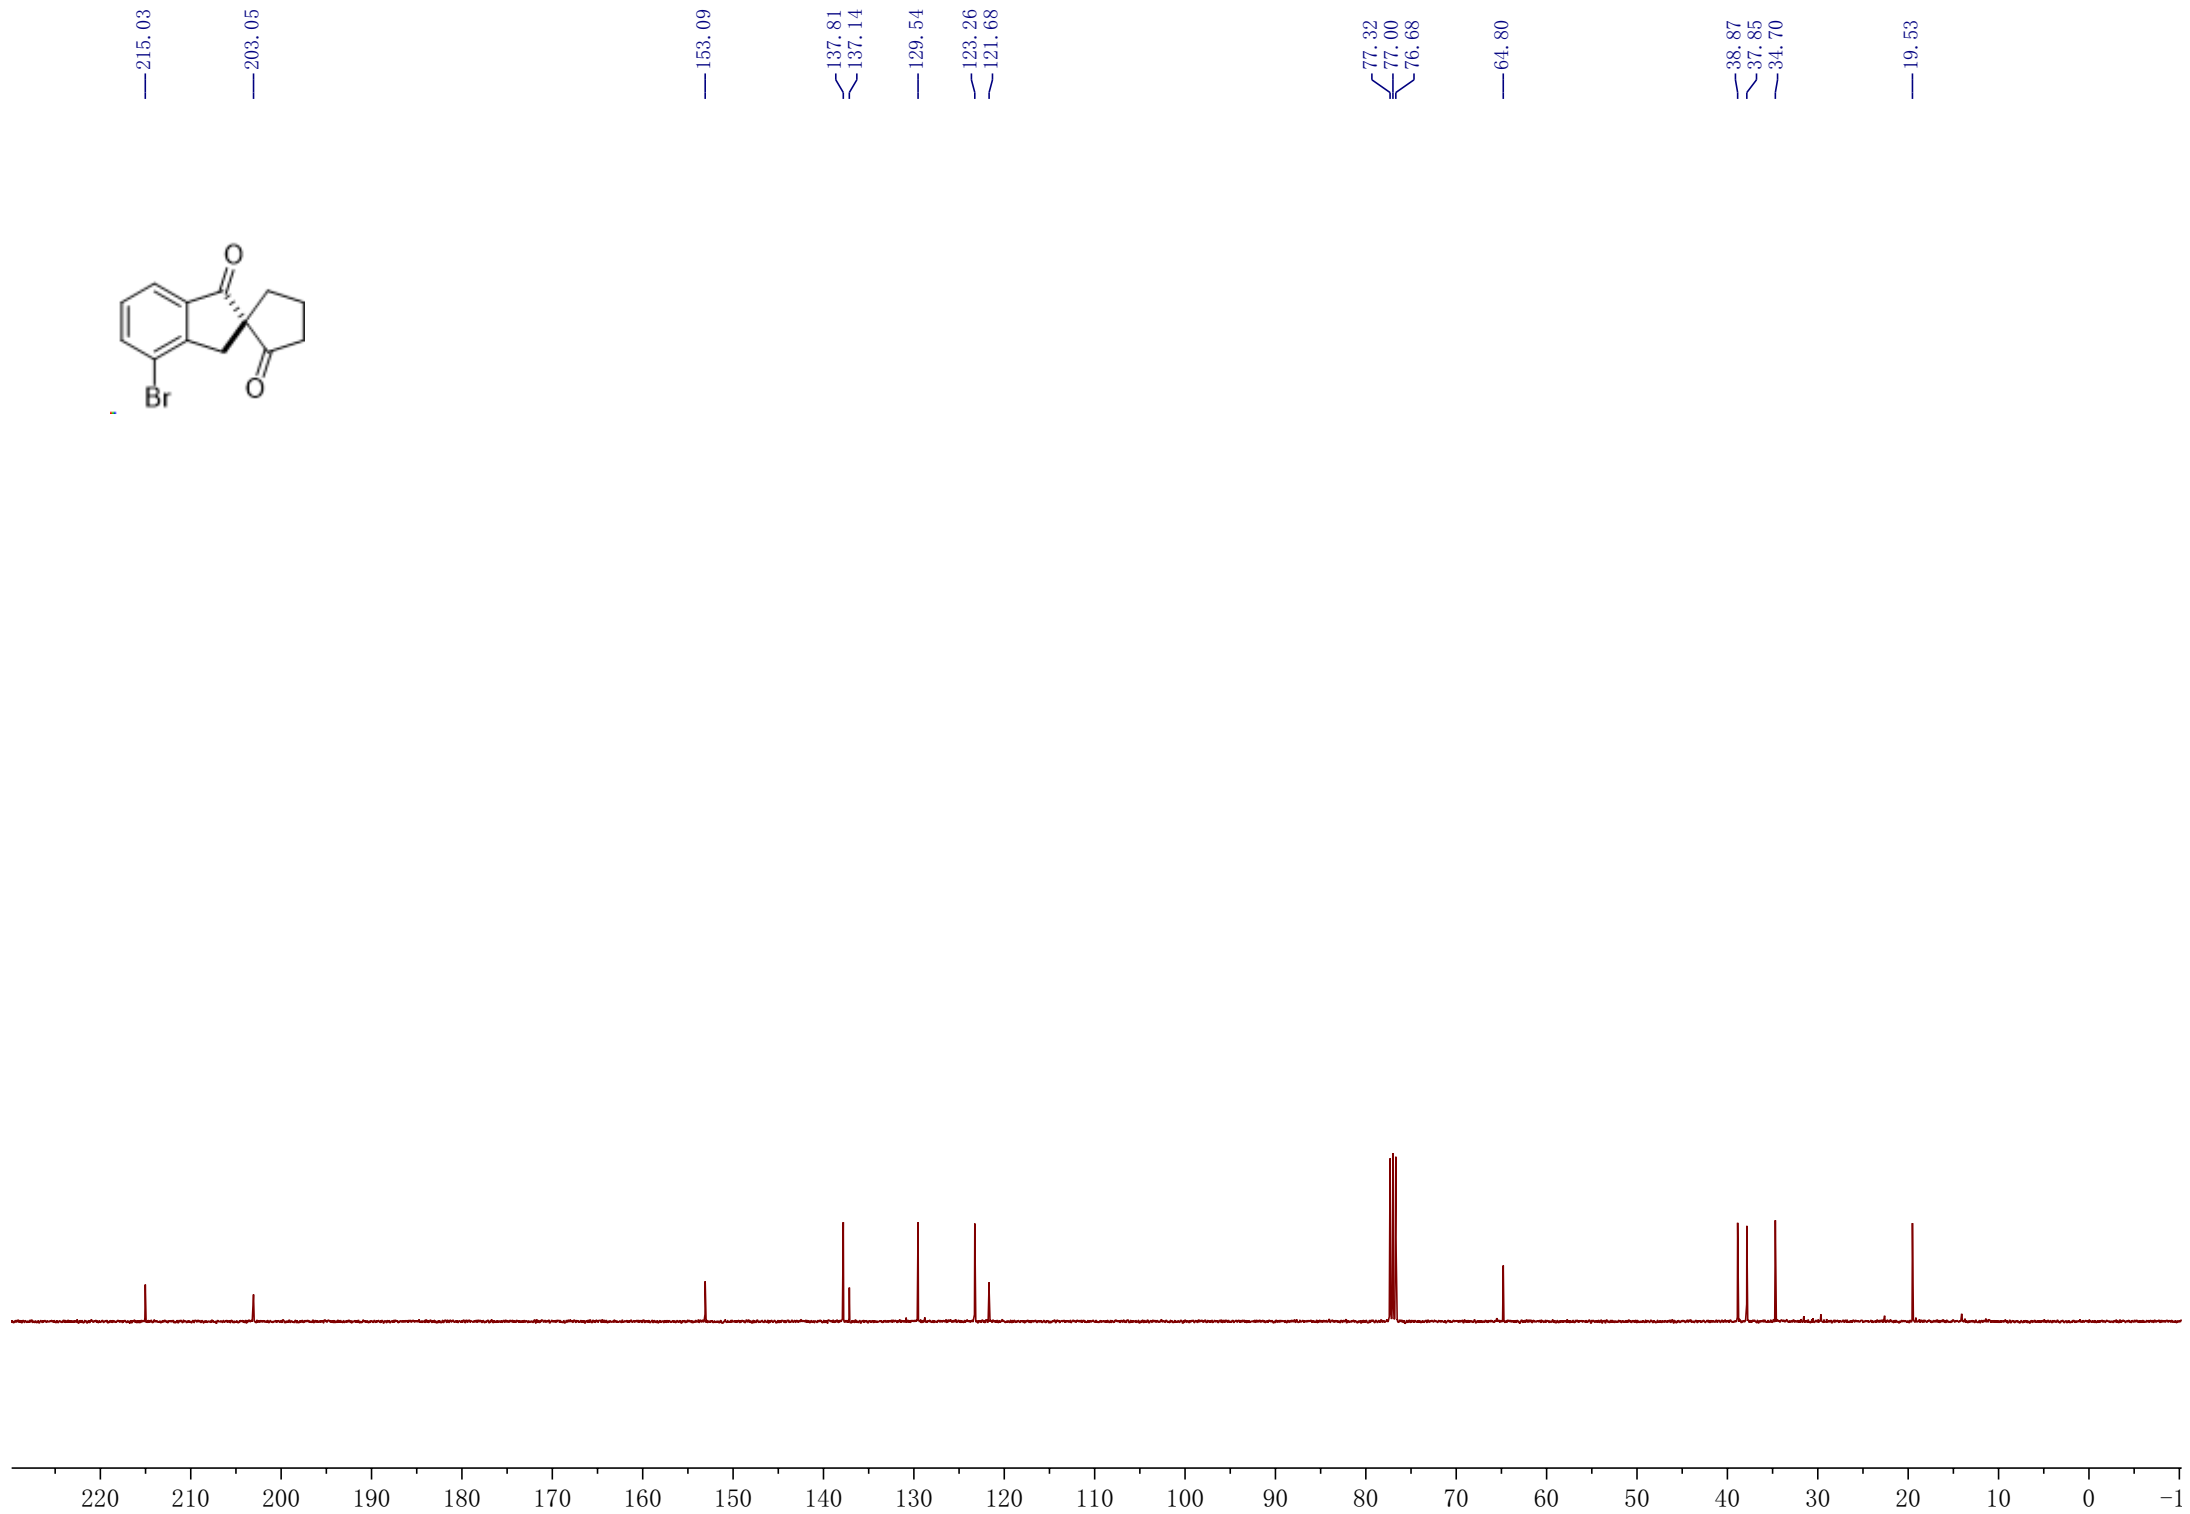

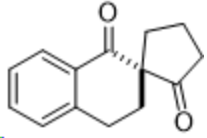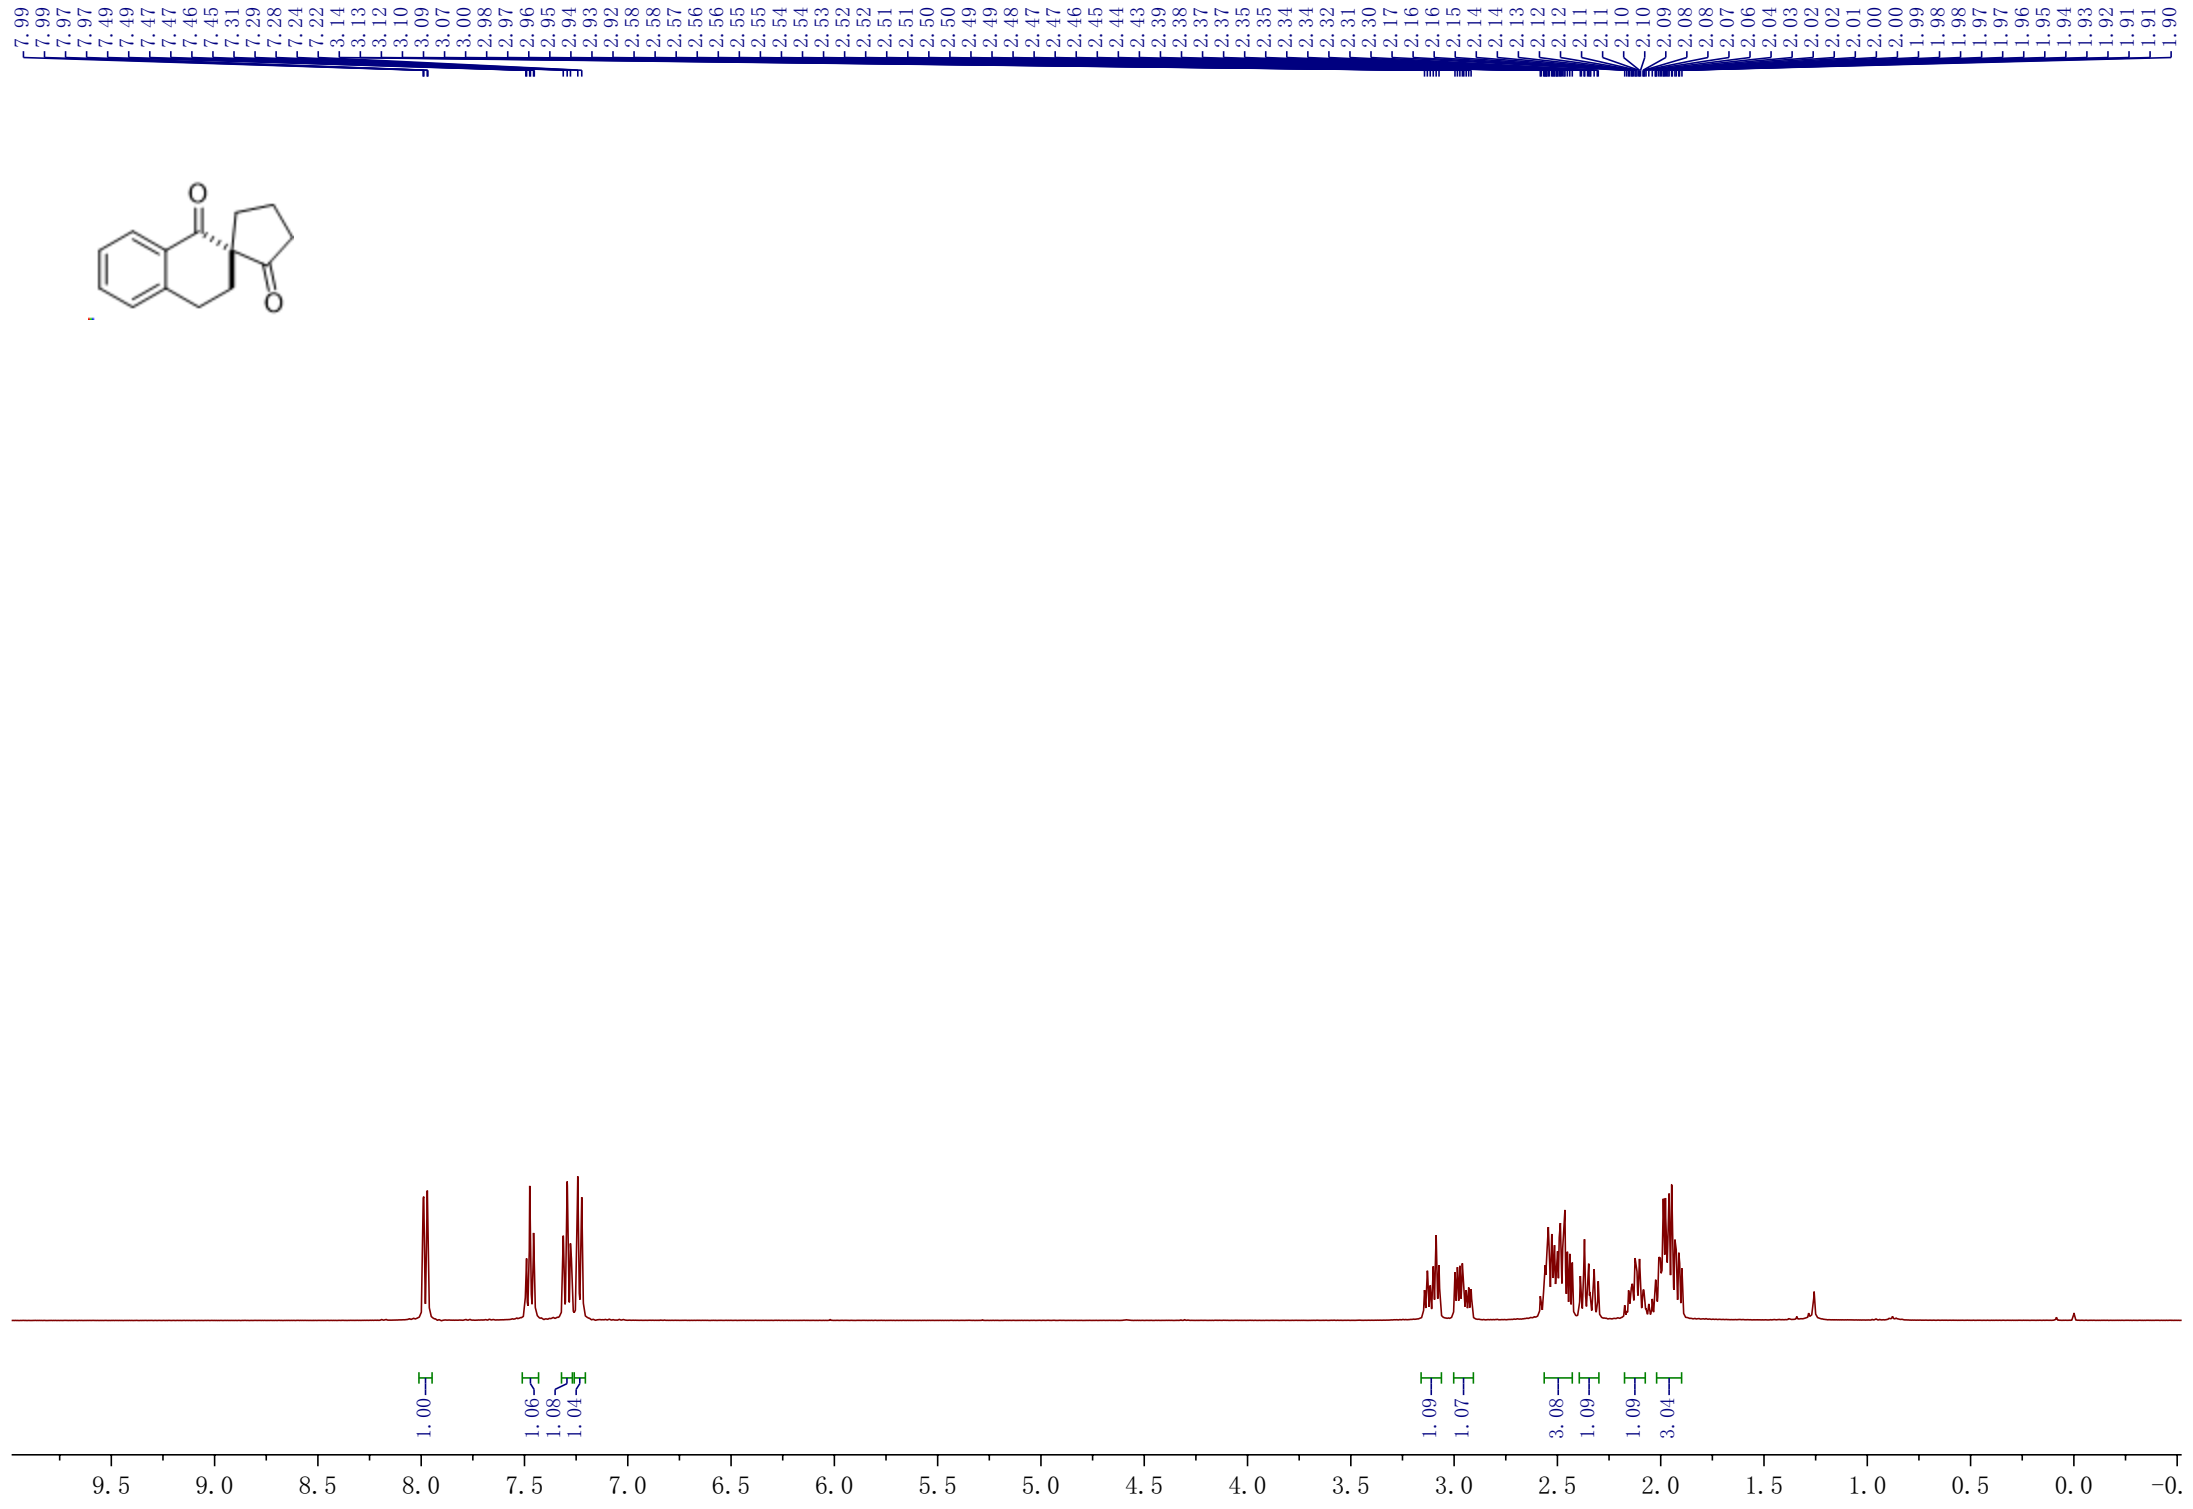

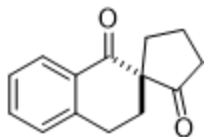

— 217.28

— 197.51

— 143.57

— 133.63

— 131.01

— 128.59

— 127.62

— 126.66

— 77.32

— 77.00

— 76.68

— 60.42

— 38.69

— 33.57

— 30.27

— 25.39

— 19.02

30 220 210 200 190 180 170 160 150 140 130 120 110 100 90 80 70 60 50 40 30 20 10 0 -1



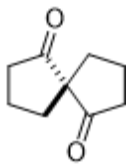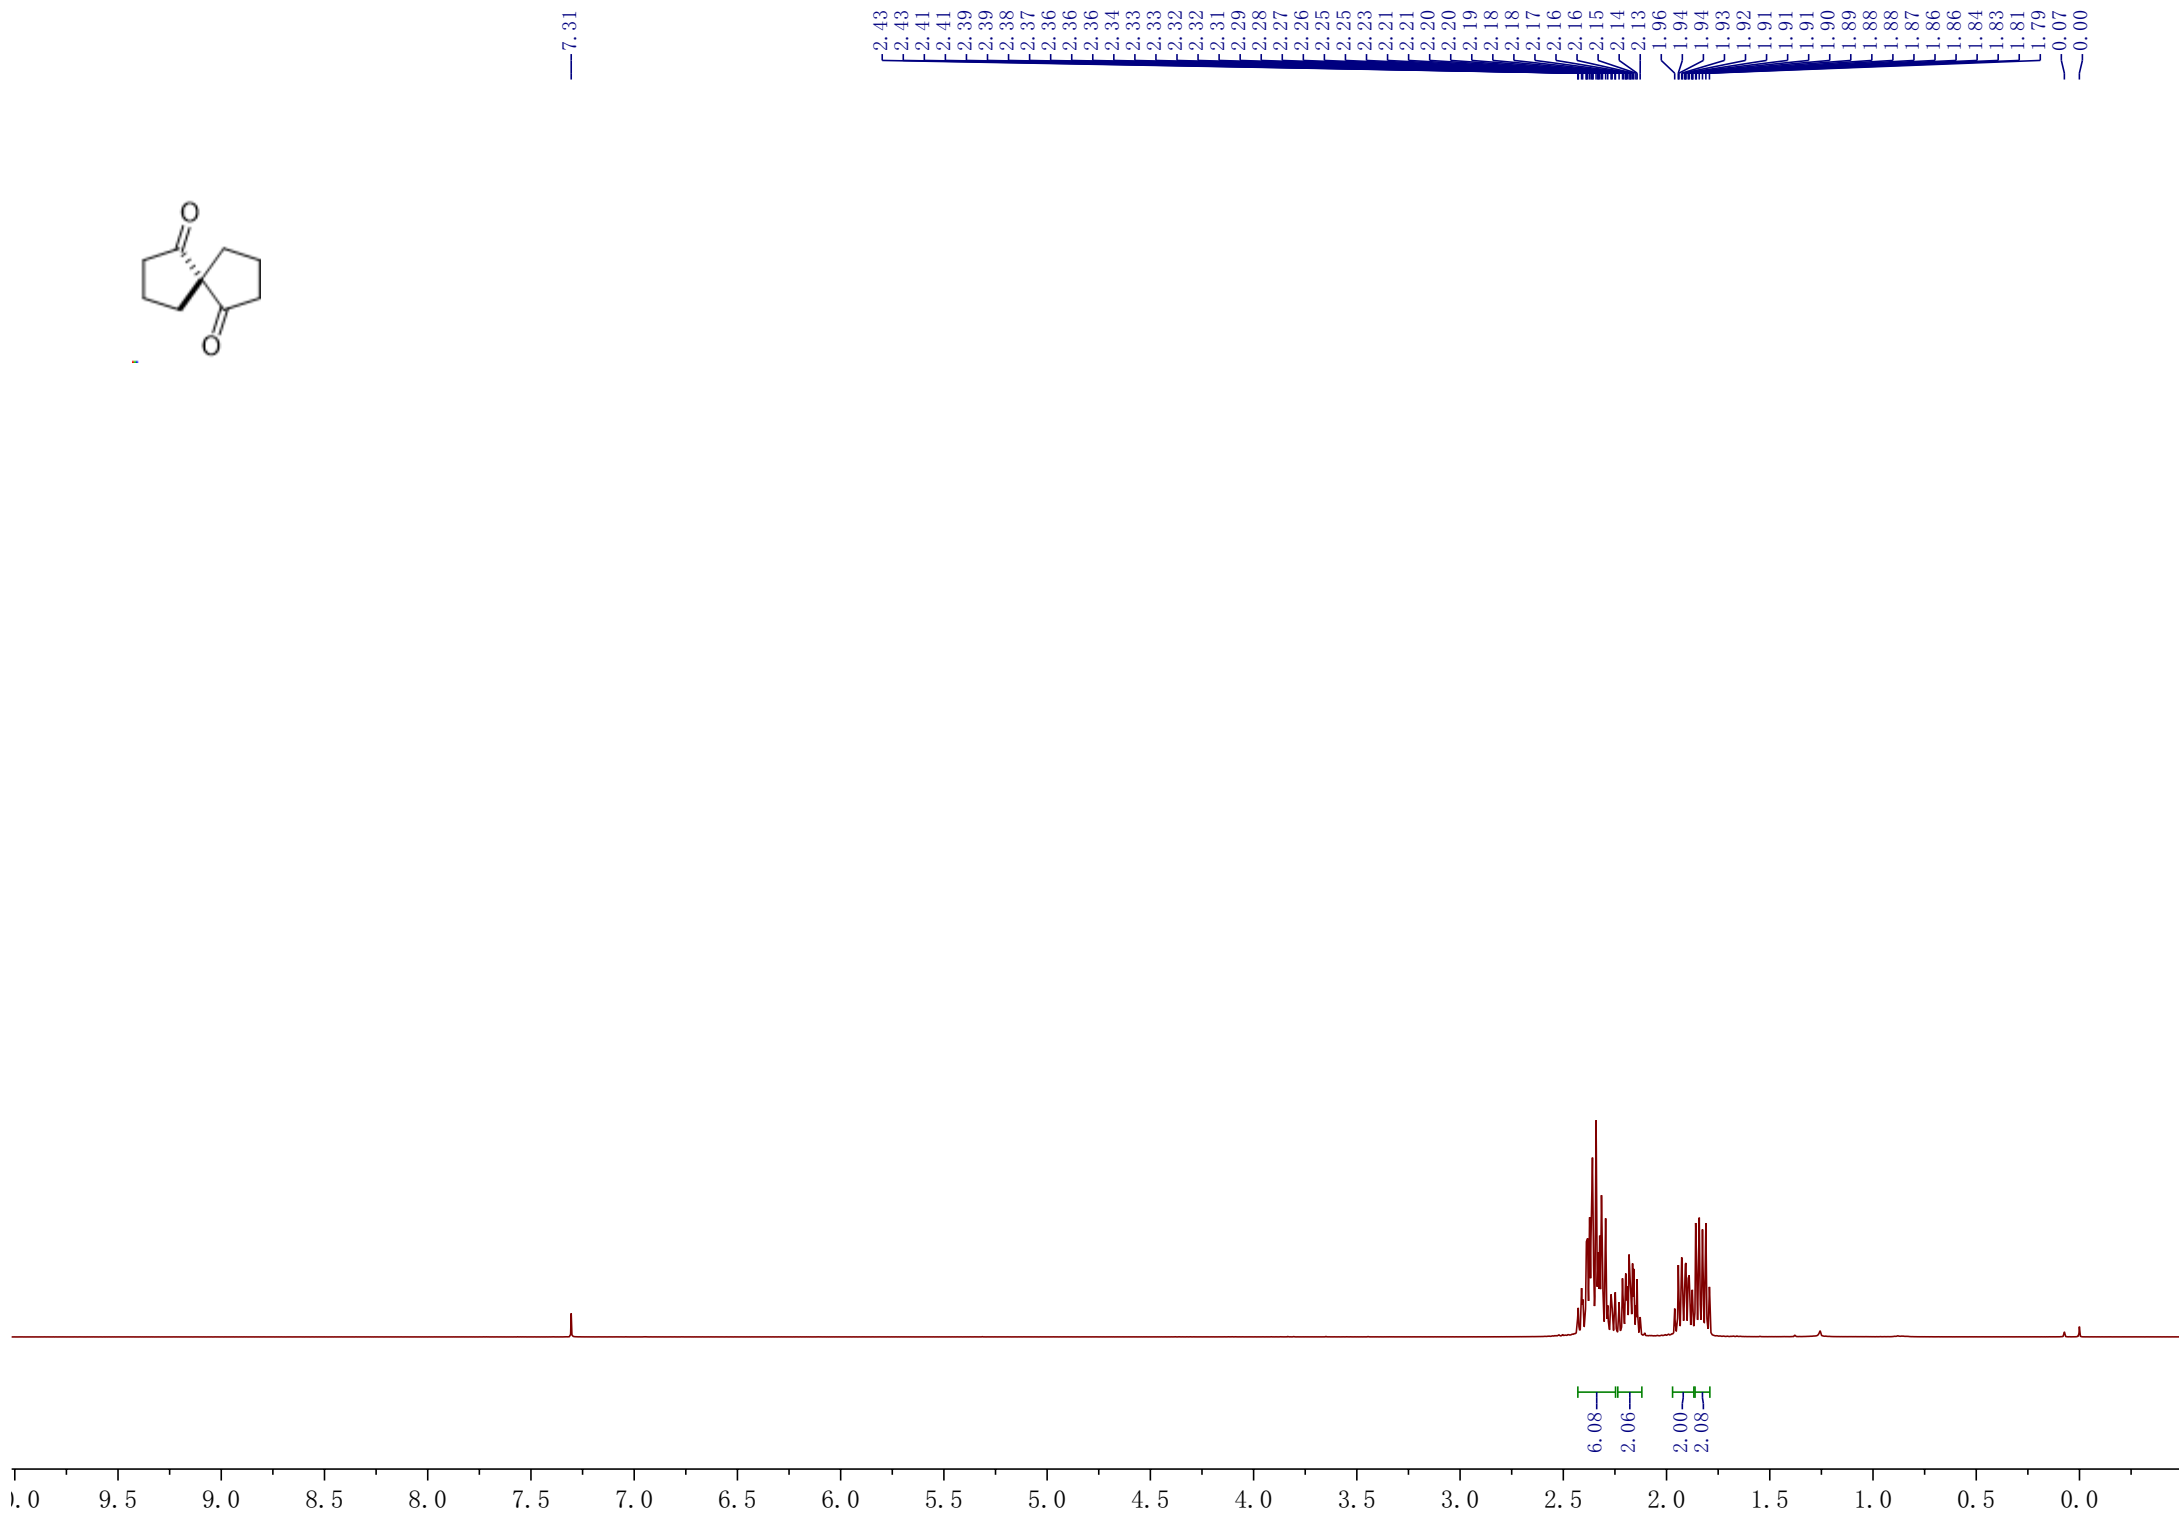

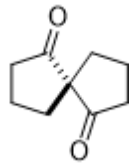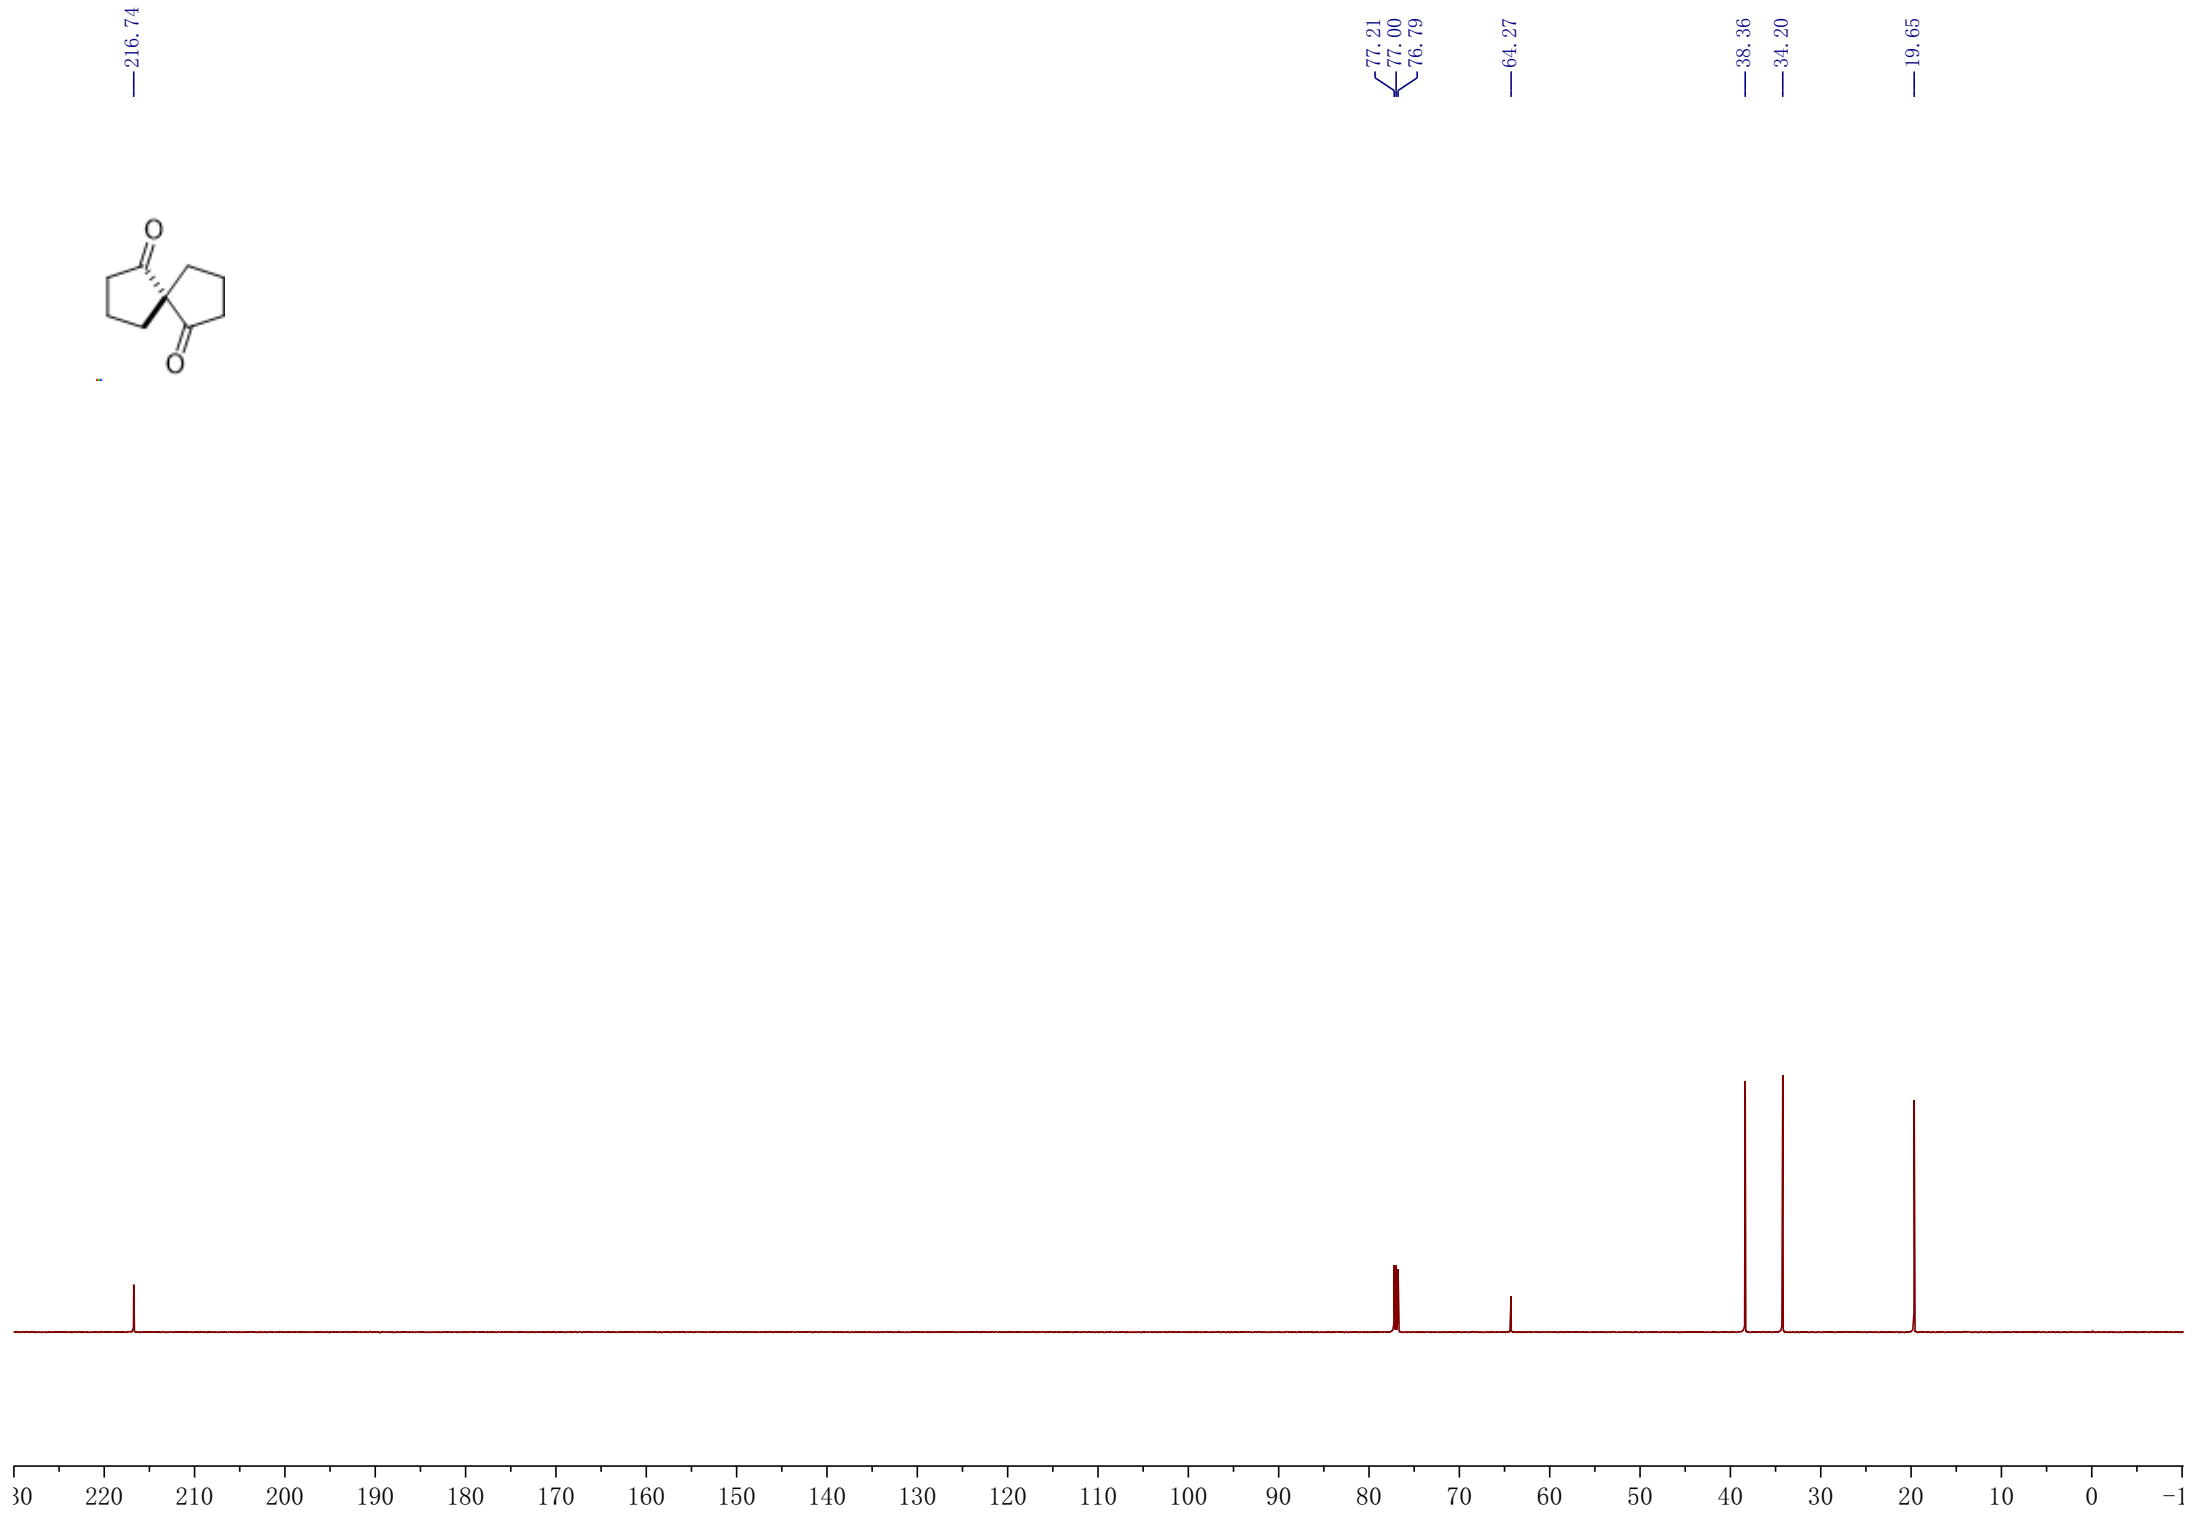

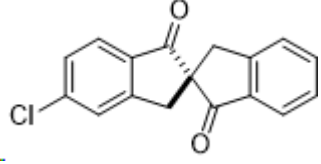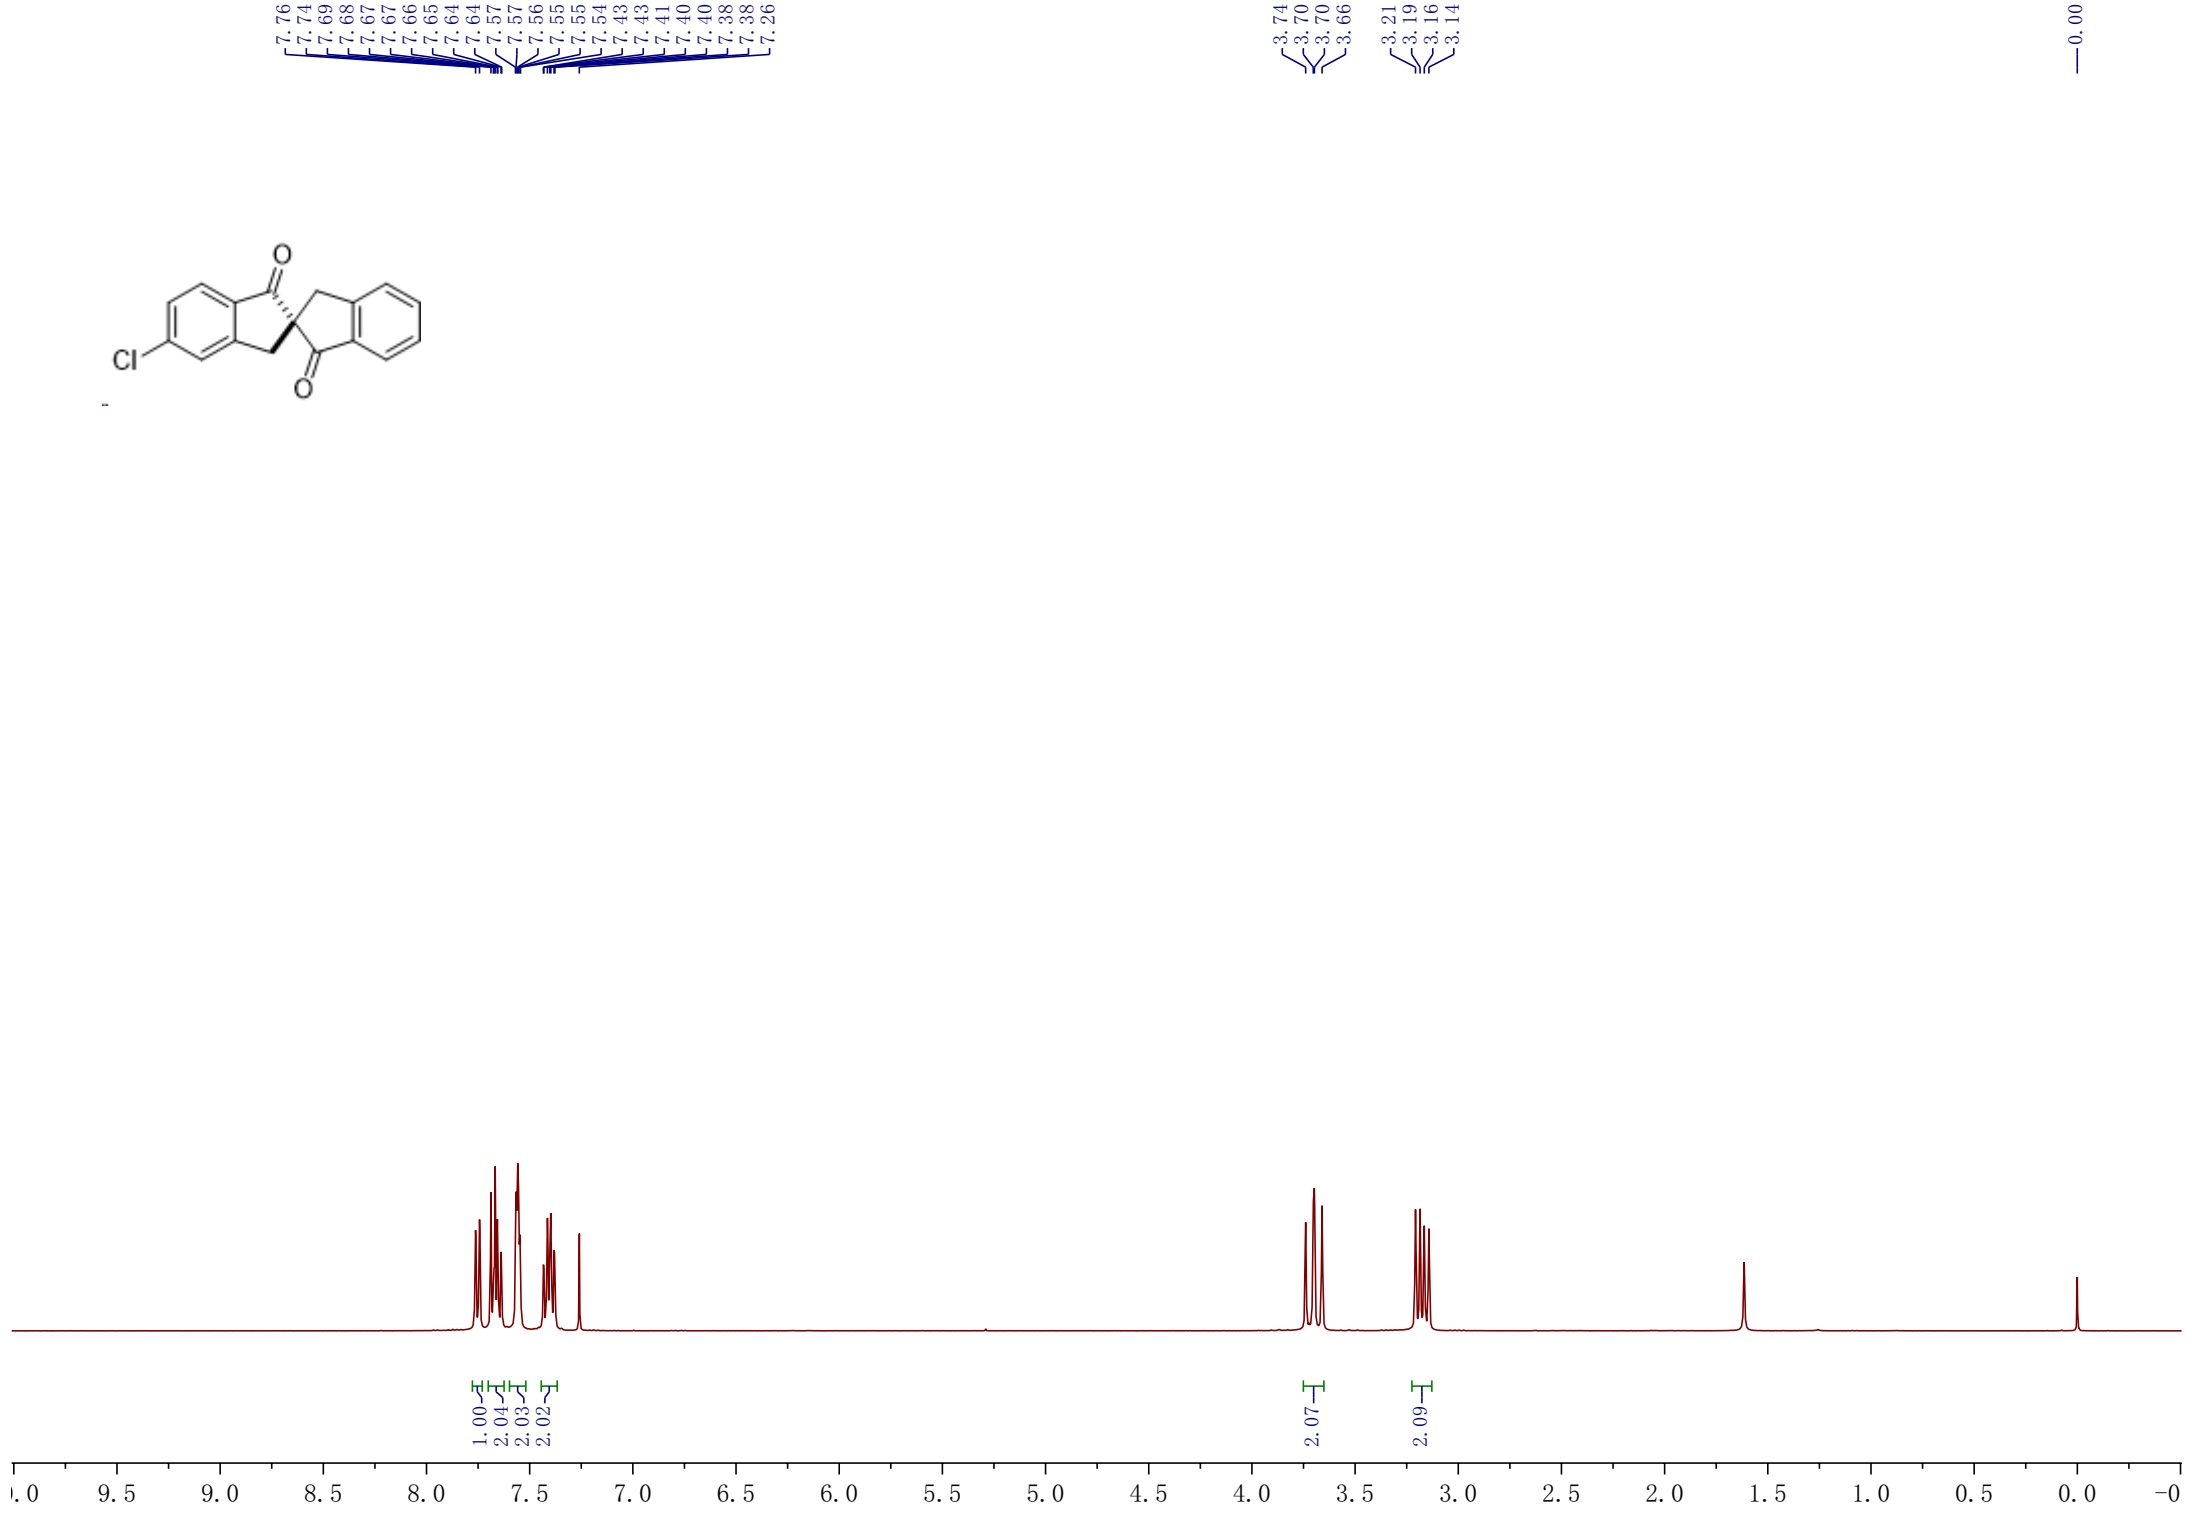

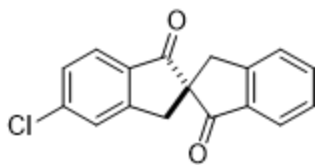

202.07  
201.03

155.12  
153.61

141.76  
135.31  
135.05  
133.78  
128.50  
127.77  
126.50  
126.27  
125.73  
124.80

77.32  
77.00  
76.68

65.38

37.71  
37.47

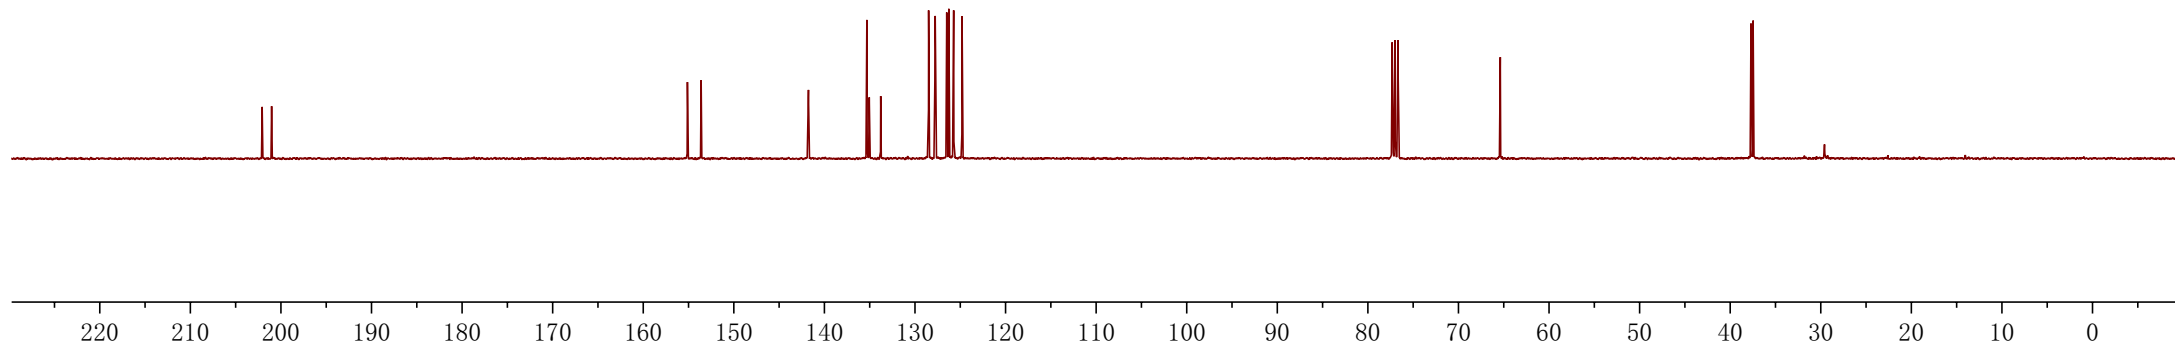

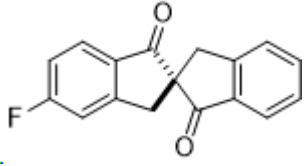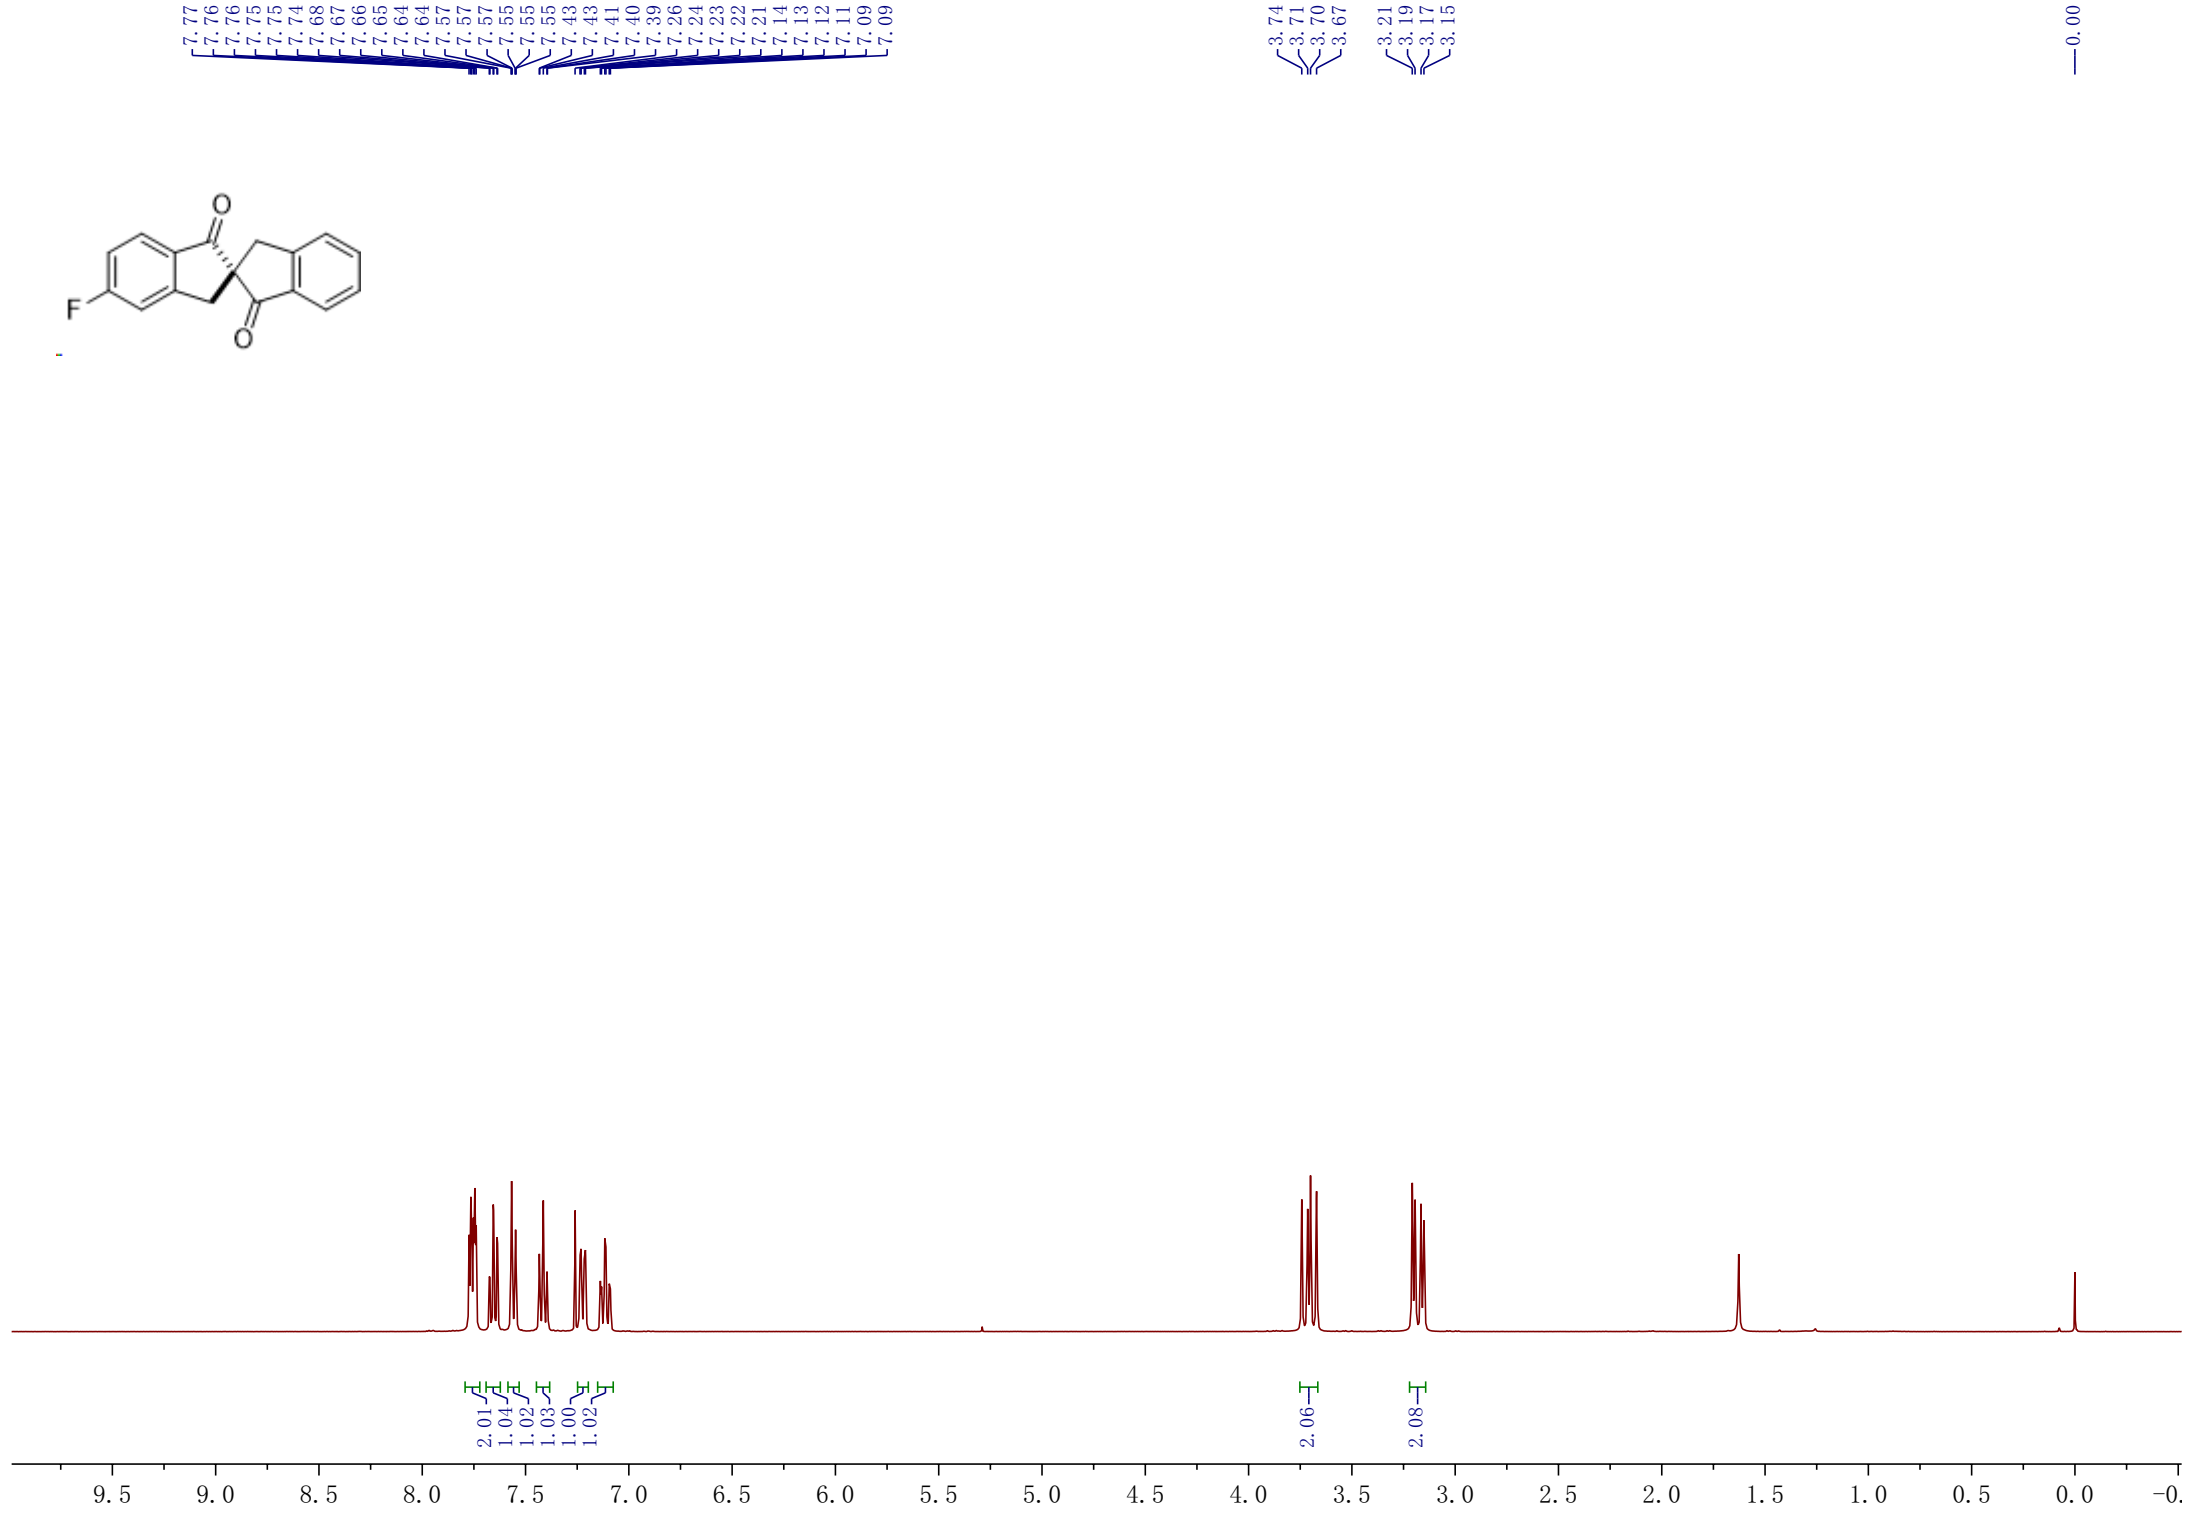

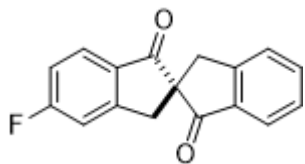

202.30  
200.65

168.31  
166.61

156.70  
156.63  
153.68

135.37  
135.20  
131.77  
131.76  
127.84  
127.15  
127.08  
126.33  
124.92  
116.25  
116.09  
113.16  
113.01

77.21  
77.00  
76.79

65.55

37.84  
37.72  
37.70

220 210 200 190 180 170 160 150 140 130 120 110 100 90 80 70 60 50 40 30 20 10 0 -1

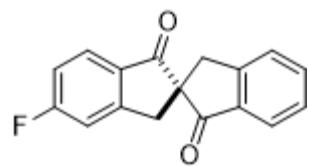

— -101.72

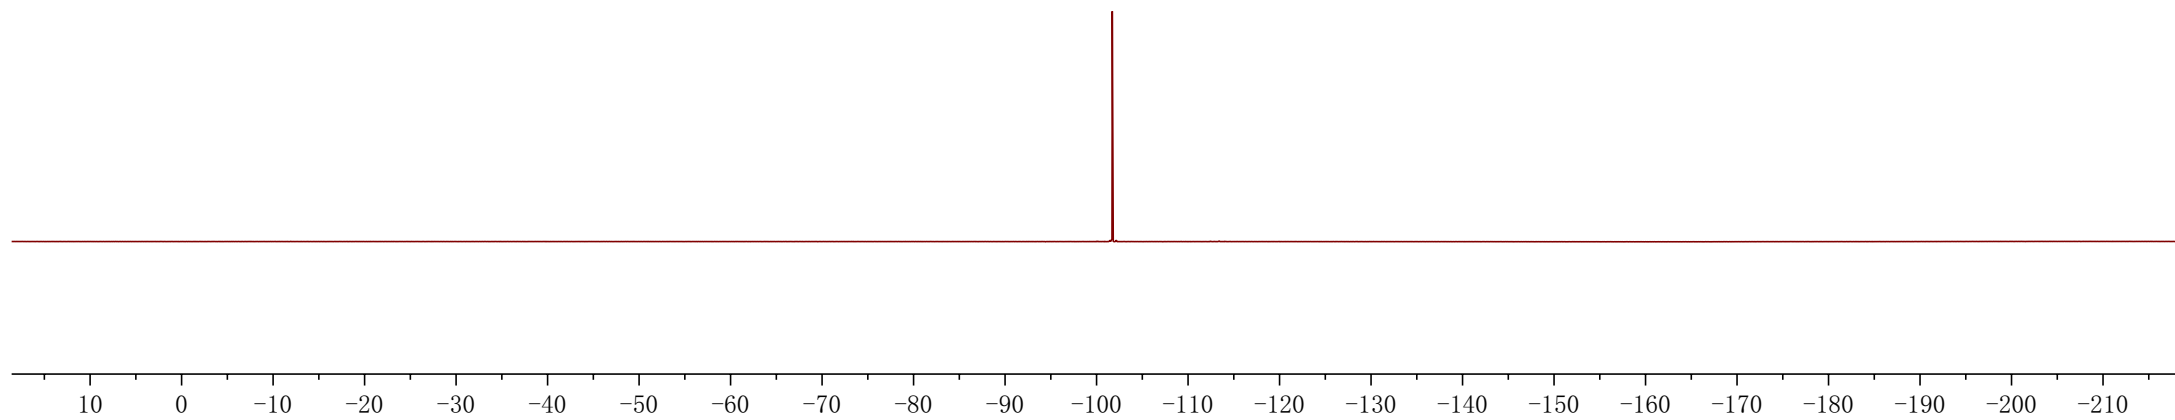

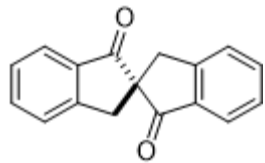

7.77  
7.75  
7.67  
7.65  
7.63  
7.63  
7.57  
7.55  
7.43  
7.41  
7.39  
7.26

3.74  
3.70

3.21  
3.17

-0.00

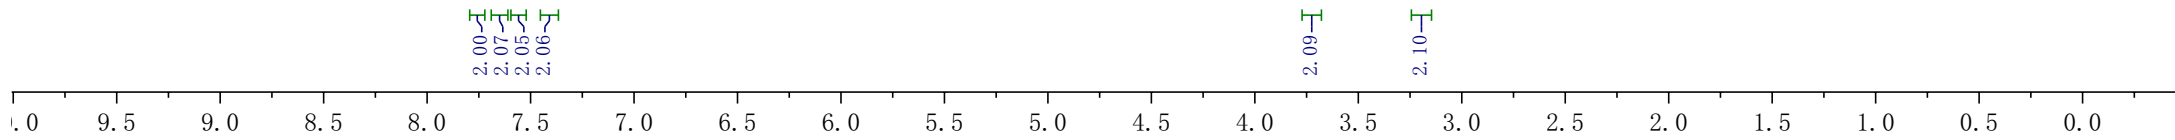



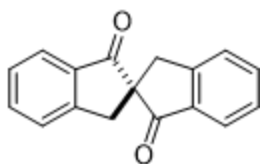

—202.62

—153.79

135.44  
135.24

127.77  
126.33  
124.88

77.32  
77.00  
76.68

—65.32

—38.06

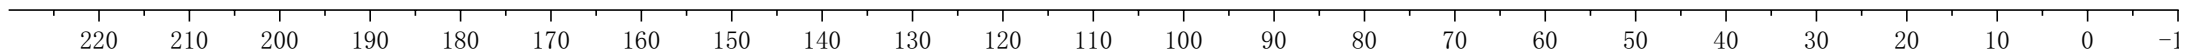

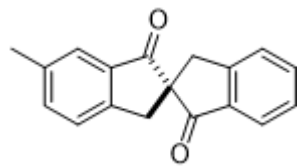

7.76  
7.74  
7.66  
7.66  
7.64  
7.64  
7.62  
7.56  
7.56  
7.55  
7.54  
7.48  
7.48  
7.46  
7.46  
7.45  
7.43  
7.42  
7.40  
7.38  
7.26

3.74  
3.69  
3.68  
3.64

3.20  
3.16  
3.11

2.41

0.08  
0.00

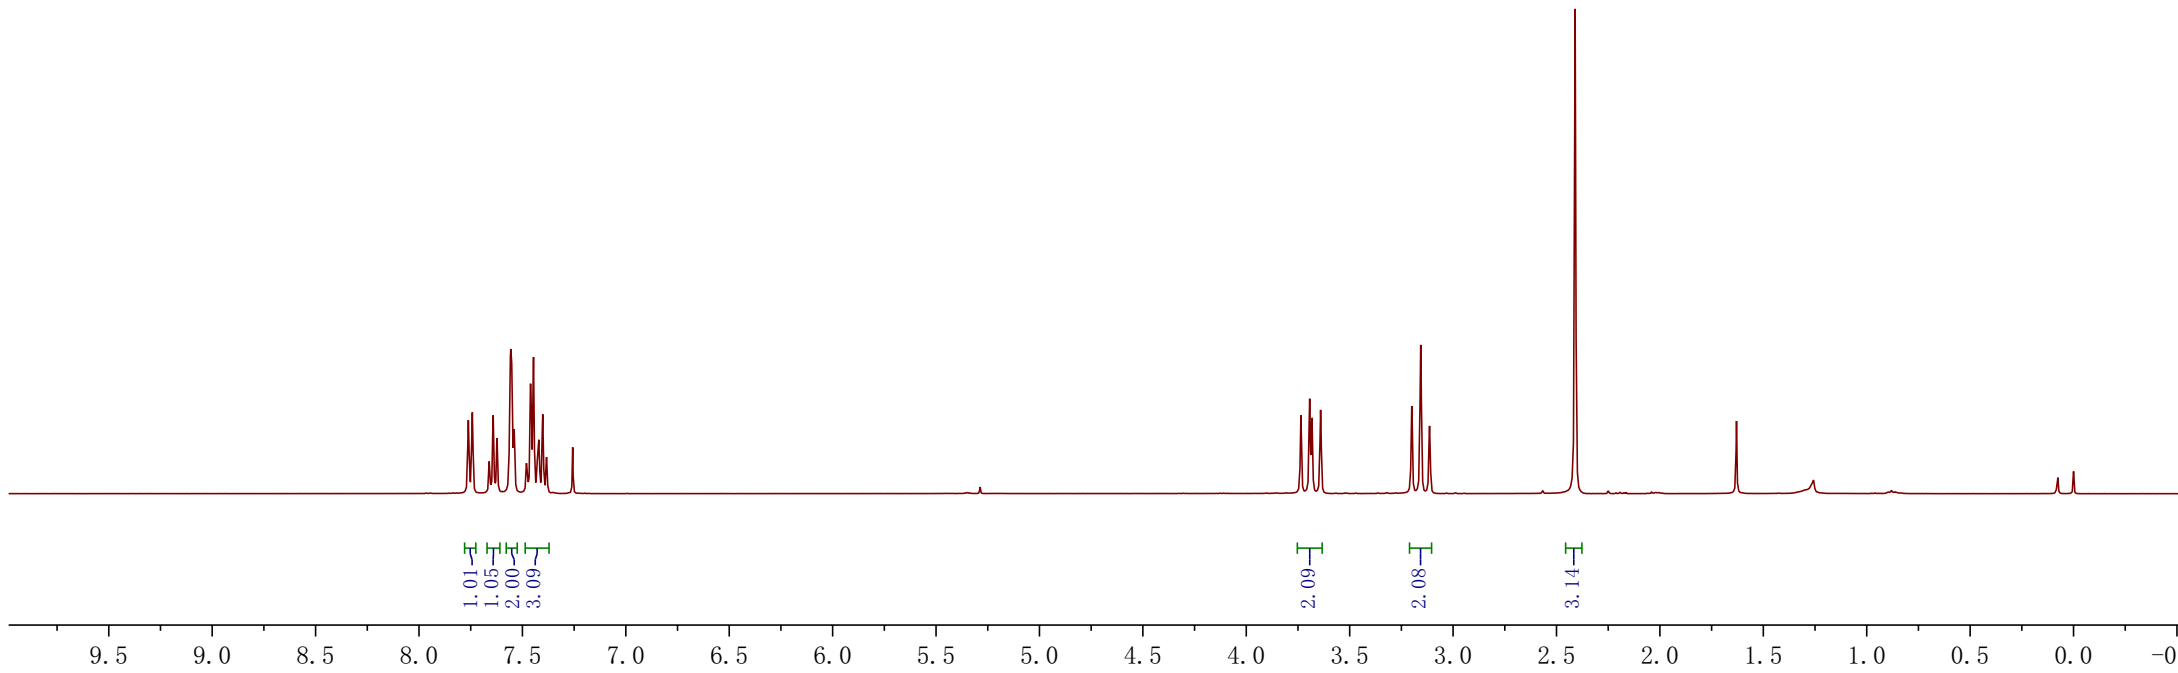

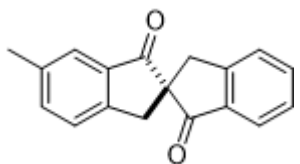

202.75  
202.66

153.81  
151.19

137.75  
136.53  
135.61  
135.46  
135.18  
127.71  
126.31  
125.96  
124.84  
124.75

77.32  
77.00  
76.68

65.65

38.03  
37.75

21.04

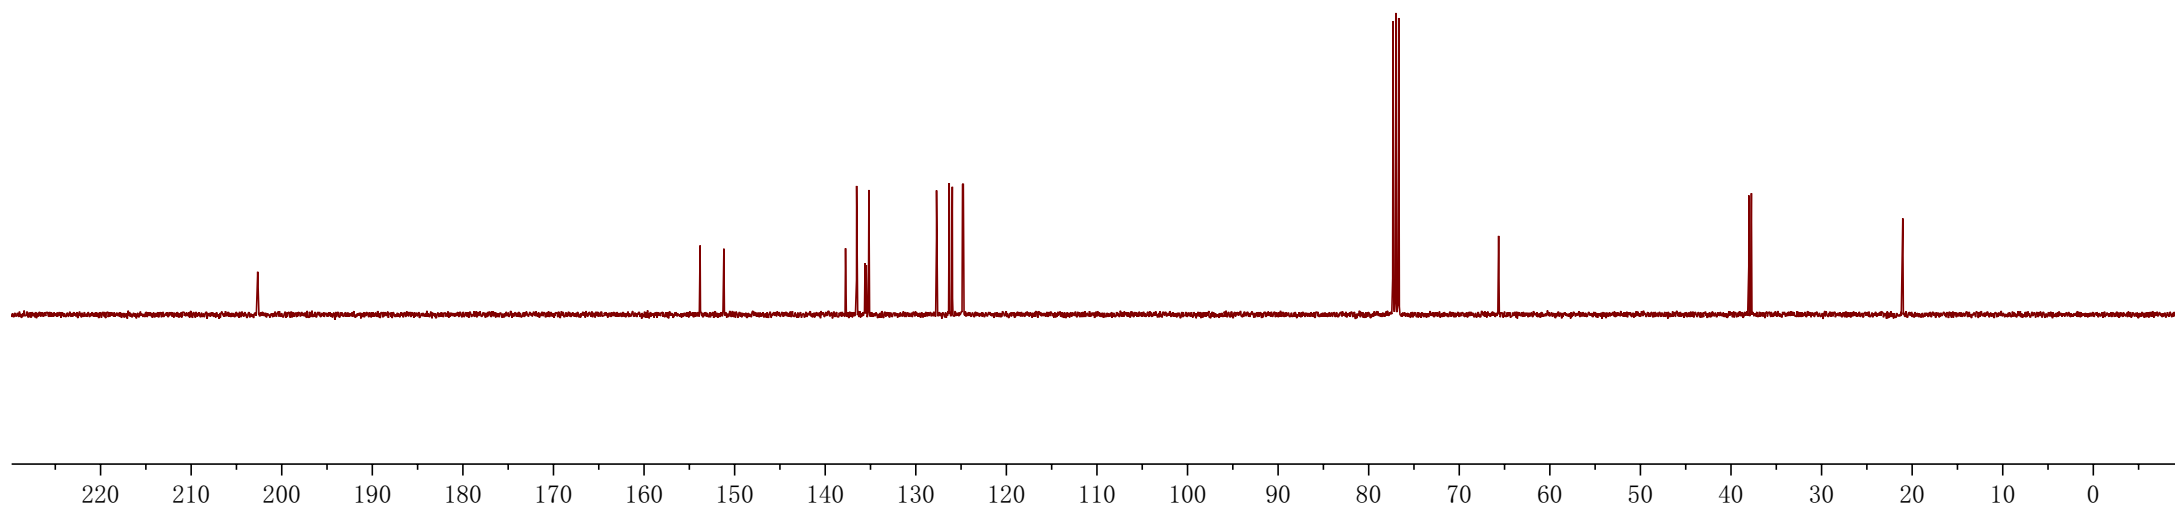

Sample Name: 2a-rac

Wave Length: 254.5nm

Column: Trefoil™ CEL2 80:20

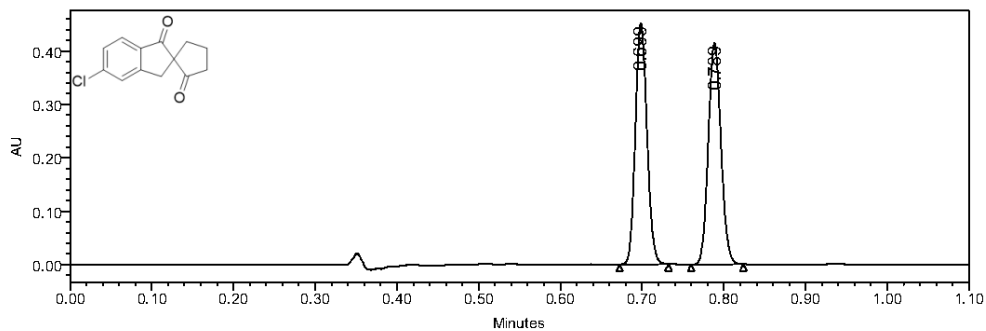

## peak information:

|   | RetTime (min) | Area (μV*s) | Area (%) | Height (μV) |
|---|---------------|-------------|----------|-------------|
| 1 | 0.699         | 446514      | 50.01    | 451526      |
| 2 | 0.789         | 446394      | 49.99    | 414730      |

Sample Name: 2a-sym

Wave Length: 254.5nm

Column: Trefoil™ CEL2 80:20

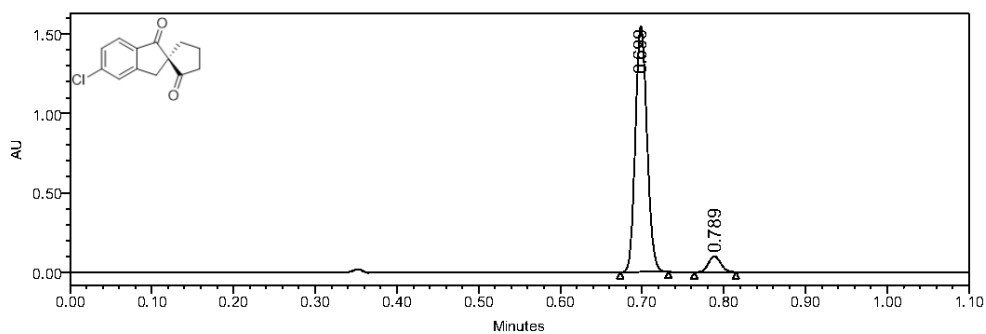

## peak information:

|   | RetTime (min) | Area (μV*s) | Area (%) | Height (μV) |
|---|---------------|-------------|----------|-------------|
| 1 | 0.699         | 1536335     | 93.61    | 1549795     |
| 2 | 0.789         | 104894      | 6.39     | 99355       |

Sample Name: 2b-rac  
Column: Trefoil™ CEL2 80:20

Wave Length: 258.1nm

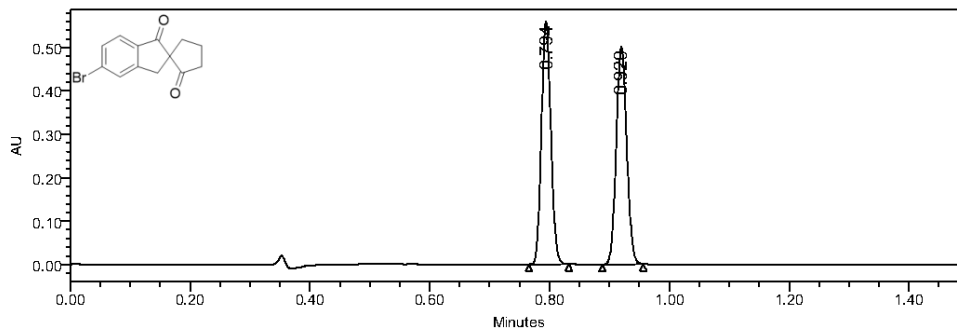**peak information:**

|   | RetTime (min) | Area (μV*s) | Area (%) | Height (μV) |
|---|---------------|-------------|----------|-------------|
| 1 | 0.794         | 610049      | 50.00    | 557759      |
| 2 | 0.920         | 610100      | 50.00    | 500454      |

Sample Name: 2b-sym  
Column: Trefoil™ CEL2 80:20

Wave Length: 258.1nm

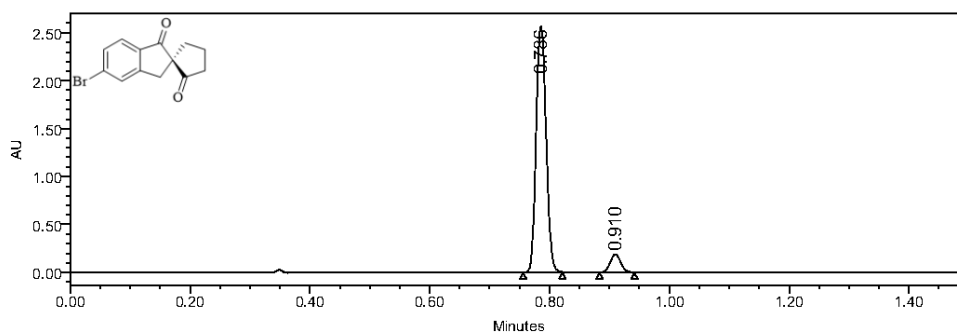**peak information:**

|   | RetTime (min) | Area (μV*s) | Area (%) | Height (μV) |
|---|---------------|-------------|----------|-------------|
| 1 | 0.786         | 2966543     | 92.89    | 2566707     |
| 2 | 0.910         | 226985      | 7.11     | 187705      |

Sample Name: 2c-rac Wave Length: 246.2nm  
 Column: Trefoil™ CEL2 80:20

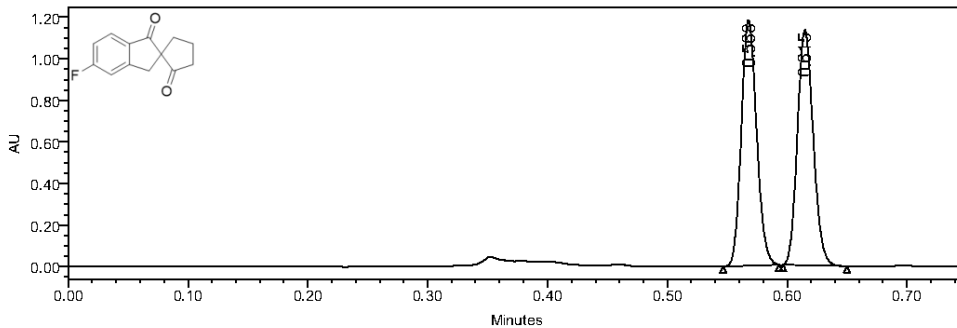

peak information:

|   | RetTime (min) | Area (μV*s) | Area (%) | Height (μV) |
|---|---------------|-------------|----------|-------------|
| 1 | 0.568         | 1048758     | 50.10    | 1184397     |
| 2 | 0.615         | 1044398     | 49.90    | 1134787     |

Sample Name: 2c-sym Wave Length: 246.2nm  
 Column: Trefoil™ CEL2 80:20

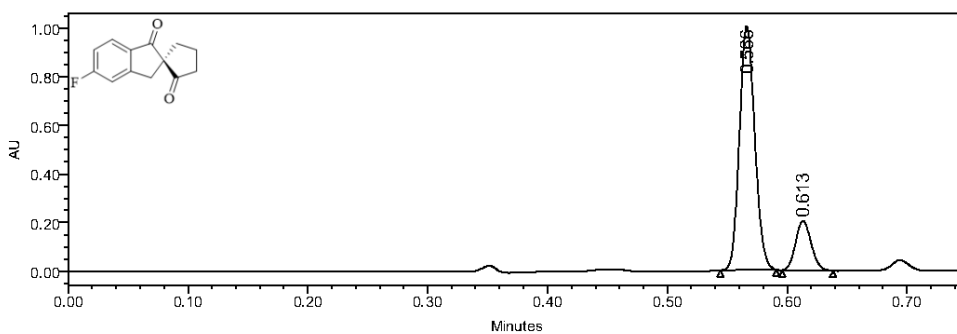

peak information:

|   | RetTime (min) | Area (μV*s) | Area (%) | Height (μV) |
|---|---------------|-------------|----------|-------------|
| 1 | 0.566         | 892251      | 82.75    | 1003299     |
| 2 | 0.613         | 185961      | 17.25    | 204528      |

Sample Name: 2d-rac Wave Length: 241.5nm  
 Column: Trefoil™ CEL2 95:05

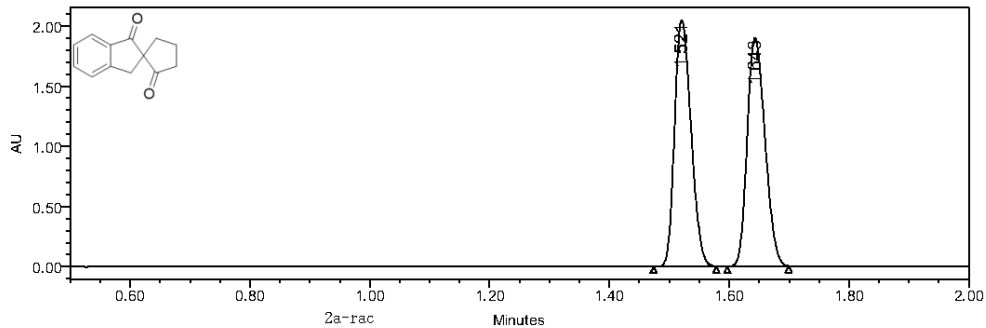

peak information:

|   | RetTime (min) | Area (μV*s) | Area (%) | Height (μV) |
|---|---------------|-------------|----------|-------------|
| 1 | 1.521         | 3917196     | 49.95    | 2047074     |
| 2 | 1.643         | 3925126     | 50.05    | 1901501     |

Sample Name: 2d-sym Wave Length: 241.5nm  
 Column: Trefoil™ CEL2 95:05

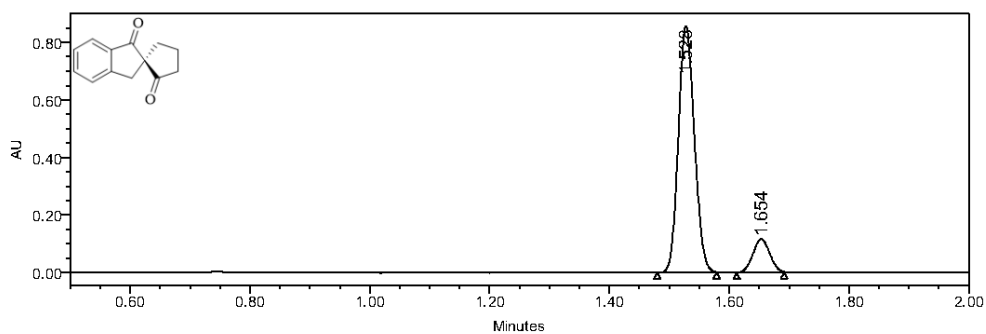

peak information:

|   | RetTime (min) | Area (μV*s) | Area (%) | Height (μV) |
|---|---------------|-------------|----------|-------------|
| 1 | 1.528         | 1589210     | 87.70    | 854993      |
| 2 | 1.654         | 222822      | 12.30    | 115227      |

Sample Name: 2e-rac Wave Length: 267.6nm  
Column: Trefoil™ CEL2 80:20

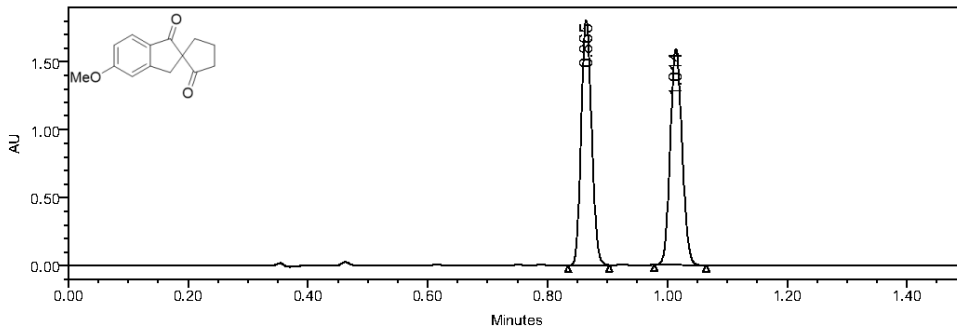

peak information:

|   | RetTime (min) | Area (μV*s) | Area (%) | Height (μV) |
|---|---------------|-------------|----------|-------------|
| 1 | 0.865         | 2182807     | 49.92    | 1805174     |
| 2 | 1.014         | 2190237     | 50.08    | 1591270     |

Sample Name: 2e-sym Wave Length: 267.6nm  
Column: Trefoil™ CEL2 80:20

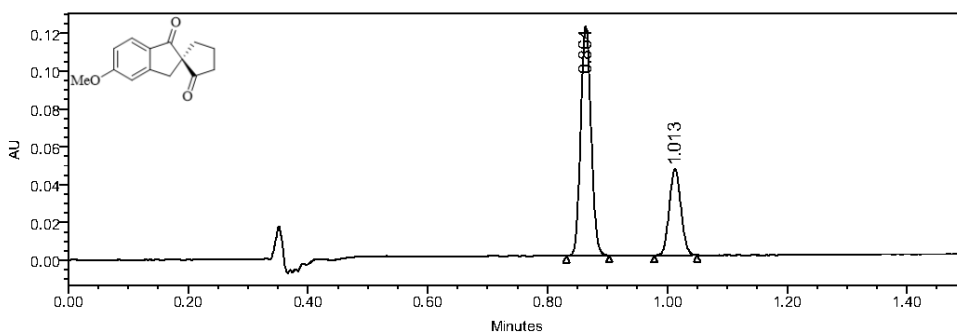

peak information:

|   | RetTime (min) | Area (μV*s) | Area (%) | Height (μV) |
|---|---------------|-------------|----------|-------------|
| 1 | 0.864         | 145956      | 70.19    | 121388      |
| 2 | 1.013         | 61997       | 29.81    | 45630       |



Sample Name: 2f-rac  
Column: Trefoil™ CEL2 80:20

Wave Length: 280.6nm

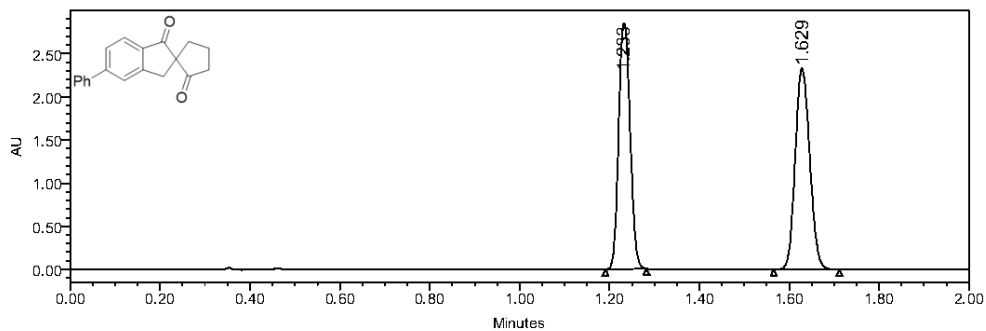**peak information:**

|   | RetTime (min) | Area (μV*s) | Area (%) | Height (μV) |
|---|---------------|-------------|----------|-------------|
| 1 | 1.233         | 5052605     | 49.05    | 2850984     |
| 2 | 1.629         | 5247521     | 50.95    | 2330634     |

Sample Name: 2f-sym  
Column: Trefoil™ CEL2 80:20

Wave Length: 280.6nm

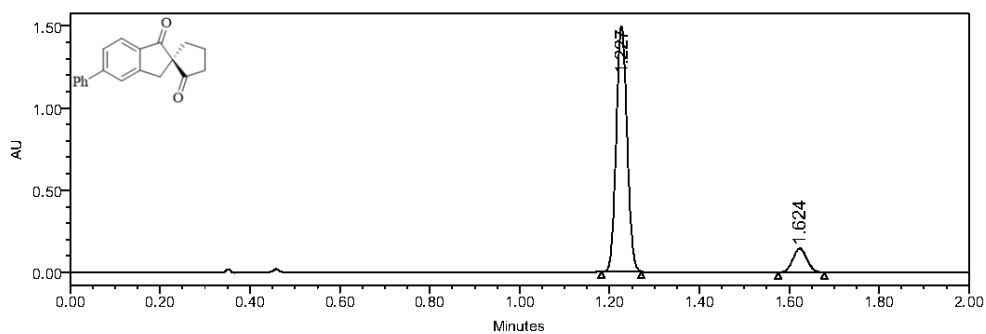**peak information:**

|   | RetTime (min) | Area (μV*s) | Area (%) | Height (μV) |
|---|---------------|-------------|----------|-------------|
| 1 | 1.227         | 2497841     | 88.79    | 1492129     |
| 2 | 1.624         | 315280      | 11.21    | 145555      |

Sample Name: 2g-rac  
Column: Trefoil™ CEL2 80:20

Wave Length: 290.1nm

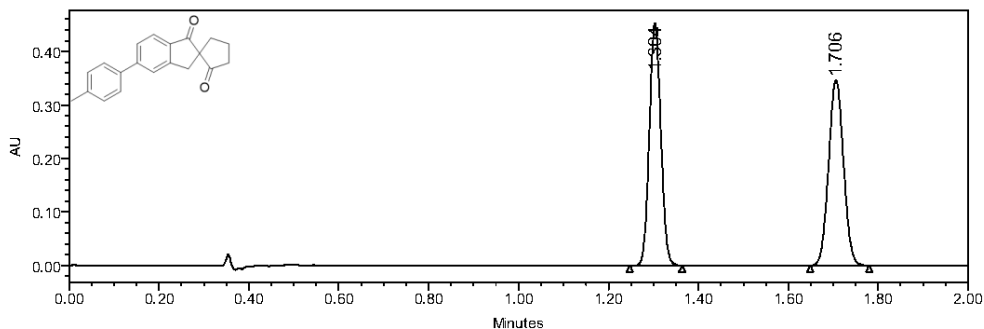

peak information:

|   | RetTime (min) | Area (μV*s) | Area (%) | Height (μV) |
|---|---------------|-------------|----------|-------------|
| 1 | 1.304         | 798556      | 49.99    | 452278      |
| 2 | 1.706         | 799005      | 50.01    | 346227      |

Sample Name: 2g-sym  
Column: Trefoil™ CEL2 80:20

Wave Length: 290.1nm

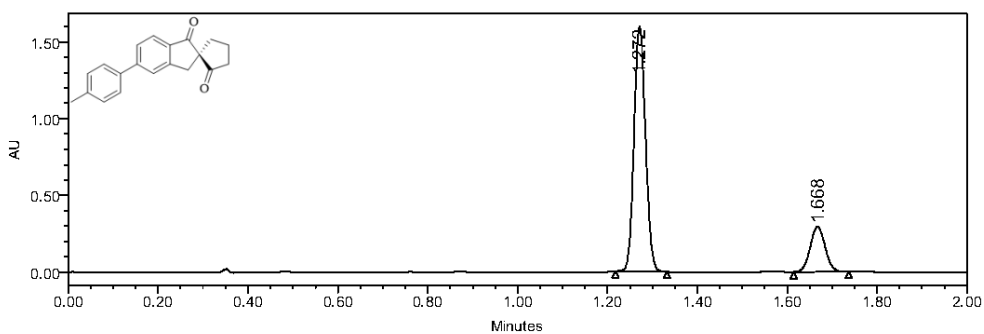

peak information:

|   | RetTime (min) | Area (μV*s) | Area (%) | Height (μV) |
|---|---------------|-------------|----------|-------------|
| 1 | 1.272         | 2830467     | 80.84    | 1600220     |
| 2 | 1.668         | 670640      | 19.16    | 294031      |

Sample Name: 2h-rac Wave Length: 274.7nm  
 Column: Trefoil™ CEL2 80:20

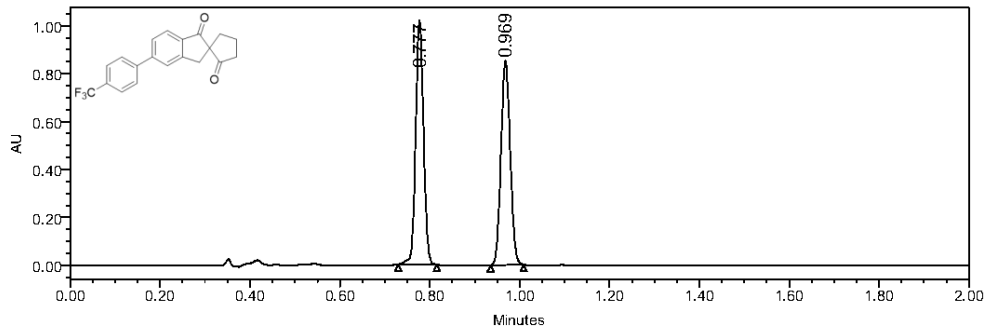

peak information:

|   | RetTime (min) | Area (μV*s) | Area (%) | Height (μV) |
|---|---------------|-------------|----------|-------------|
| 1 | 0.777         | 1239691     | 50.52    | 1019726     |
| 2 | 0.969         | 1214076     | 49.48    | 851741      |

Sample Name: 2h-sym Wave Length: 274.7nm  
 Column: Trefoil™ CEL2 80:20

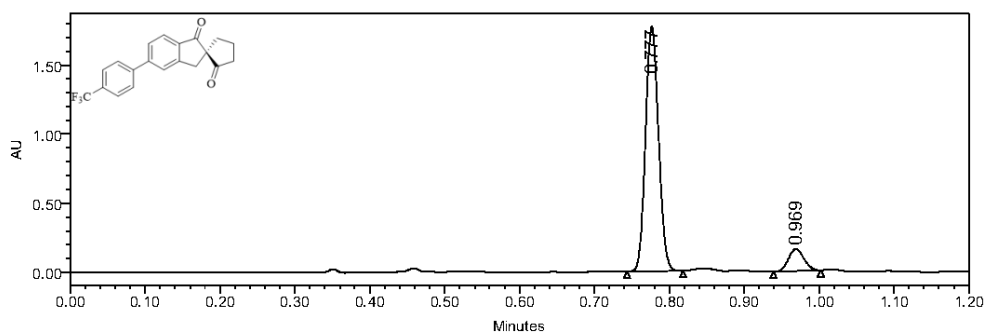

peak information:

|   | RetTime (min) | Area (μV*s) | Area (%) | Height (μV) |
|---|---------------|-------------|----------|-------------|
| 1 | 0.777         | 2145987     | 90.28    | 1777314     |
| 2 | 0.969         | 230917      | 9.72     | 159984      |

Sample Name: 2i-rac

Wave Length: 272.3nm

Column: CHIRALPAK®AD-3 80:20

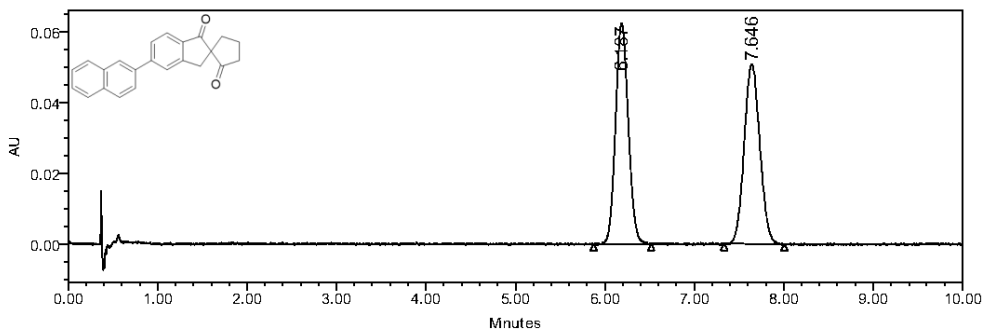

peak information:

|   | RetTime (min) | Area (μV*s) | Area (%) | Height (μV) |
|---|---------------|-------------|----------|-------------|
| 1 | 6.187         | 618704      | 50.21    | 62315       |
| 2 | 7.646         | 613590      | 49.79    | 50612       |

Sample Name: 2i-sym

Wave Length: 272.3nm

Column: CHIRALPAK® AD-3 80:20

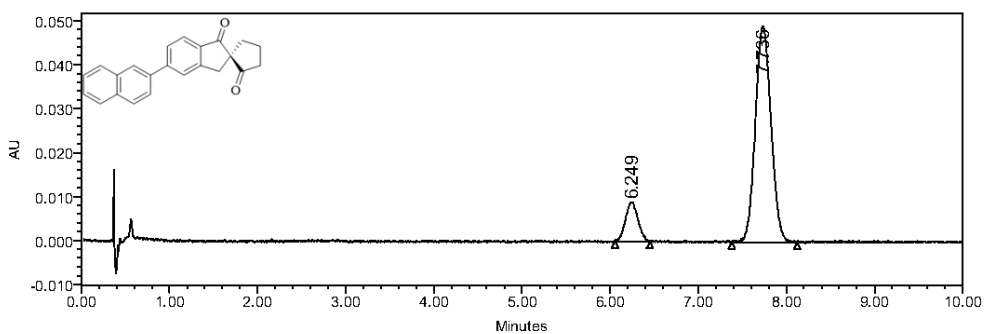

peak information:

|   | RetTime (min) | Area (μV*s) | Area (%) | Height (μV) |
|---|---------------|-------------|----------|-------------|
| 1 | 6.249         | 86428       | 12.41    | 8829        |
| 2 | 7.736         | 610051      | 87.59    | 49246       |

Sample Name: 2j-rac  
Column: Trefoil™ CEL2 80:20

Wave Length: 323.5nm

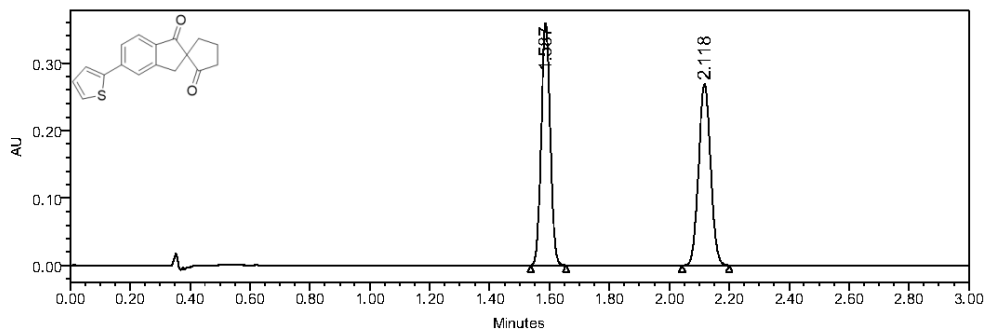**peak information:**

|   | RetTime (min) | Area (μV*s) | Area (%) | Height (μV) |
|---|---------------|-------------|----------|-------------|
| 1 | 1.587         | 749548      | 49.99    | 358588      |
| 2 | 2.118         | 749868      | 50.01    | 268700      |

Sample Name: 2j-sym  
Column: Trefoil™ CEL2 80:20

Wave Length: 323.5nm

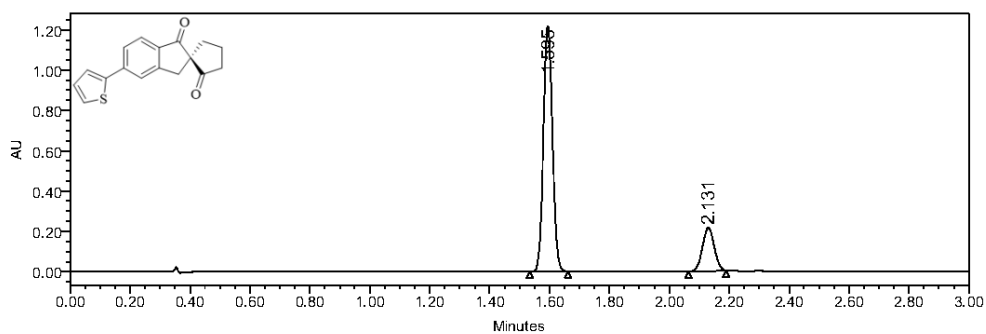**peak information:**

|   | RetTime (min) | Area (μV*s) | Area (%) | Height (μV) |
|---|---------------|-------------|----------|-------------|
| 1 | 1.595         | 2563520     | 81.32    | 1218437     |
| 2 | 2.131         | 588992      | 18.68    | 214436      |

Sample Name: 2k-rac

Wave Length: 245.0nm

Column: CHIRALPAK® AD-3 80:20

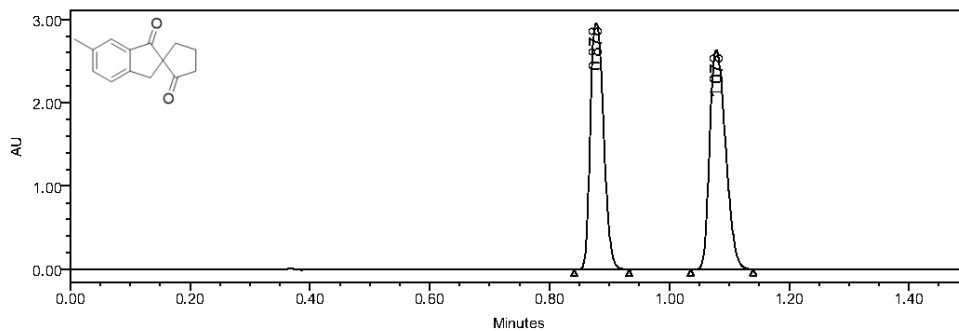

peak information:

|   | RetTime (min) | Area (μV*s) | Area (%) | Height (μV) |
|---|---------------|-------------|----------|-------------|
| 1 | 0.878         | 4566127     | 48.40    | 2957228     |
| 2 | 1.078         | 4868298     | 51.60    | 2628759     |

Sample Name: 2k-sym

Wave Length: 245.0nm

Column: CHIRALPAK® AD-3 80:20

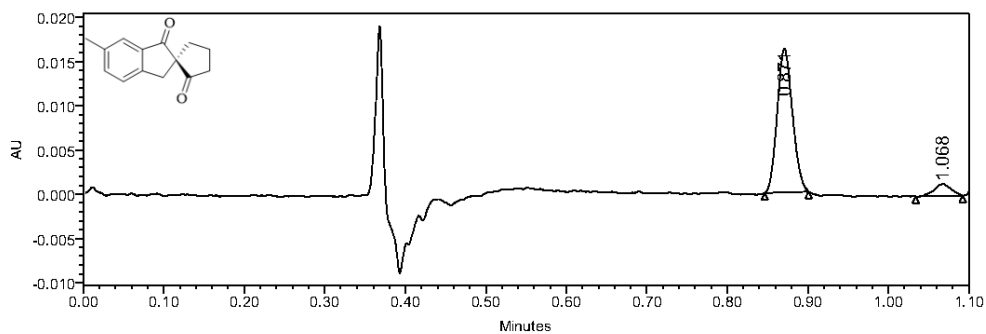

peak information:

|   | RetTime (min) | Area (μV*s) | Area (%) | Height (μV) |
|---|---------------|-------------|----------|-------------|
| 1 | 0.871         | 21191       | 91.58    | 16241       |
| 2 | 1.068         | 1949        | 8.42     | 1332        |

Sample Name: 2l-rac Wave Length: 240.3nm  
Column: Trefoil™ CEL2 95:05

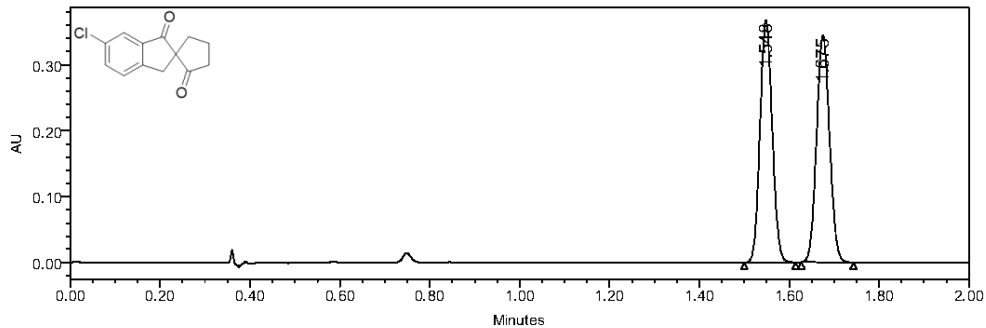

peak information:

|   | RetTime (min) | Area (μV*s) | Area (%) | Height (μV) |
|---|---------------|-------------|----------|-------------|
| 1 | 1.548         | 692325      | 50.00    | 367733      |
| 2 | 1.675         | 692408      | 50.00    | 344020      |

Sample Name: 2l-sym Wave Length: 240.3nm  
Column: Trefoil™ CEL2 95:05

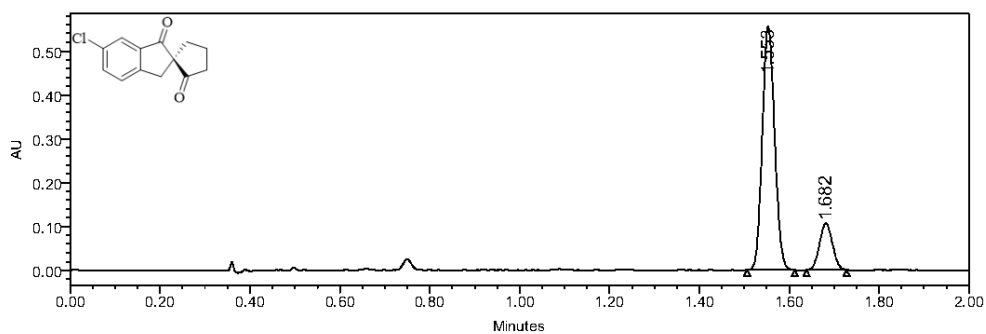

peak information:

|   | RetTime (min) | Area (μV*s) | Area (%) | Height (μV) |
|---|---------------|-------------|----------|-------------|
| 1 | 1.553         | 1056761     | 83.25    | 556228      |
| 2 | 1.682         | 212656      | 16.75    | 106254      |

Sample Name: 2m-rac

Wave Length: 246.2nm

Column: Trefoil™ CEL2 80:20

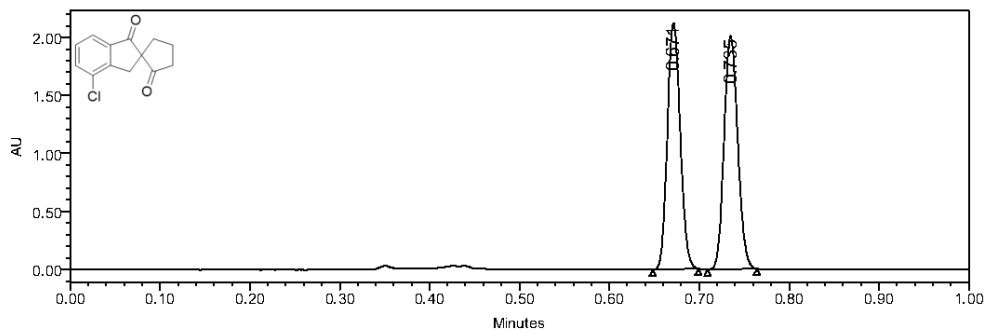

## peak information:

|   | RetTime (min) | Area (μV*s) | Area (%) | Height (μV) |
|---|---------------|-------------|----------|-------------|
| 1 | 0.671         | 2107154     | 49.88    | 2123168     |
| 2 | 0.735         | 2117069     | 50.12    | 2010733     |

Sample Name: 2m-sym

Wave Length: 246.2nm

Column: Trefoil™ CEL2 80:20

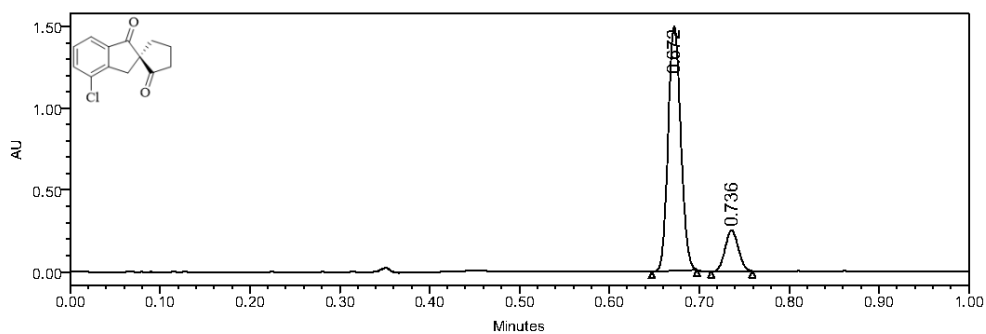

## peak information:

|   | RetTime (min) | Area (μV*s) | Area (%) | Height (μV) |
|---|---------------|-------------|----------|-------------|
| 1 | 0.672         | 1457299     | 85.11    | 1495857     |
| 2 | 0.736         | 254955      | 14.89    | 250473      |



Sample Name: 2n-rac Wave Length: 252.1nm  
 Column: Trefoil™ CEL2 80:20

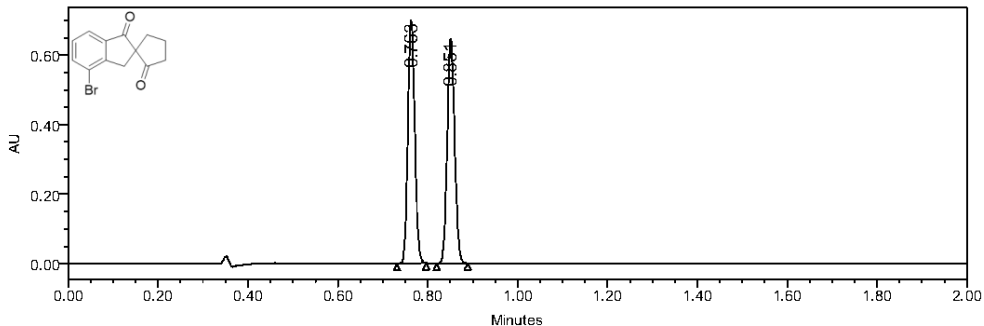

peak information:

|   | RetTime (min) | Area (μV*s) | Area (%) | Height (μV) |
|---|---------------|-------------|----------|-------------|
| 1 | 0.763         | 747054      | 50.03    | 698773      |
| 2 | 0.851         | 746042      | 49.97    | 645821      |

Sample Name: 2n-sym Wave Length: 252.1nm  
 Column: Trefoil™ CEL2 80:20

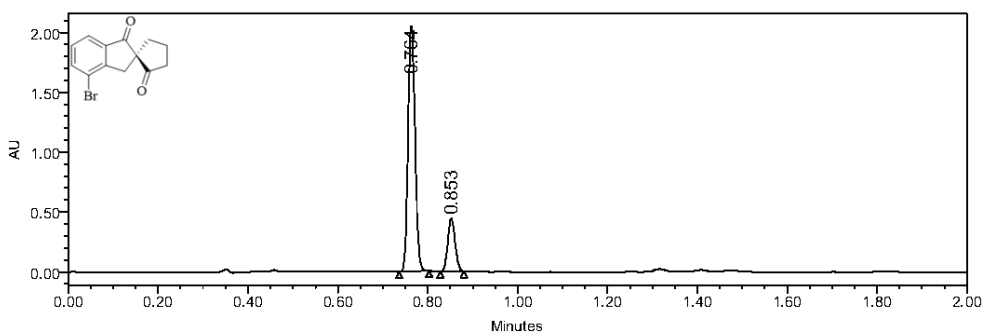

peak information:

|   | RetTime (min) | Area (μV*s) | Area (%) | Height (μV) |
|---|---------------|-------------|----------|-------------|
| 1 | 0.764         | 2209034     | 81.41    | 2048216     |
| 2 | 0.853         | 504269      | 18.59    | 444067      |

Sample Name: 2o-rac

Wave Length: 246.2nm

Column: Trefoil™ CEL2 95:05

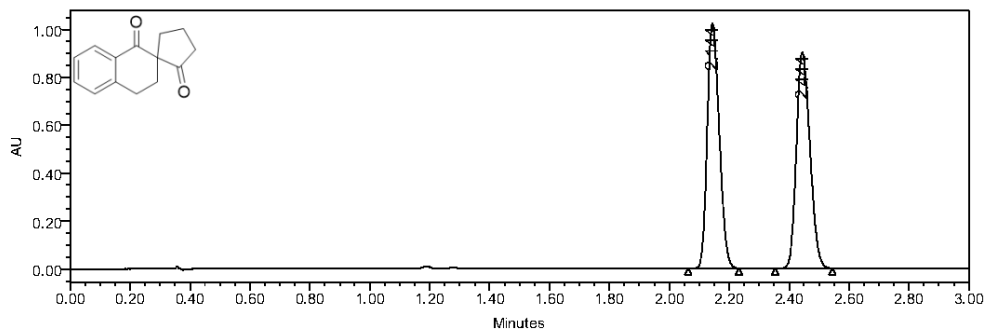

## peak information:

|   | RetTime (min) | Area (μV*s) | Area (%) | Height (μV) |
|---|---------------|-------------|----------|-------------|
| 1 | 2.144         | 2844792     | 49.99    | 1022661     |
| 2 | 2.444         | 2845491     | 50.01    | 901586      |

Sample Name: 2o-sym

Wave Length: 246.2nm

Column: Trefoil™ CEL2 95:05

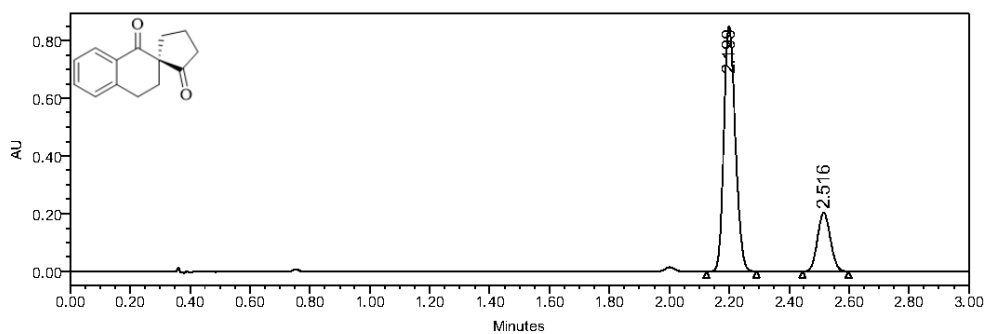

## peak information:

|   | RetTime (min) | Area (μV*s) | Area (%) | Height (μV) |
|---|---------------|-------------|----------|-------------|
| 1 | 2.199         | 2272536     | 78.82    | 849710      |
| 2 | 2.516         | 610826      | 21.18    | 204409      |

Sample Name: 2p-rac

Wave Length: 202.6nm

Column: Trefoil™ CEL2 95:05

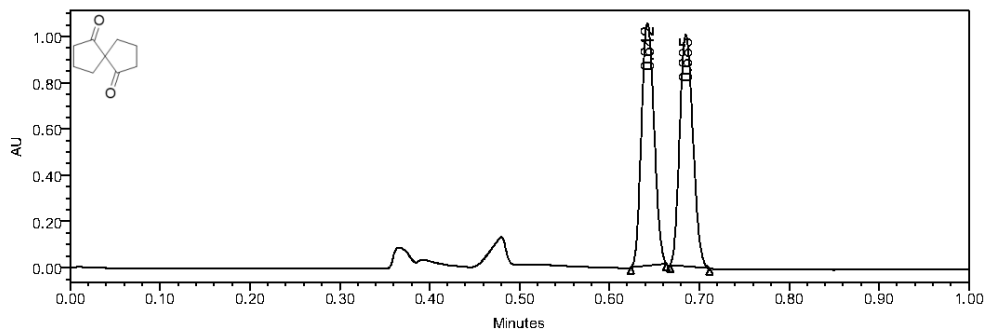

## peak information:

|   | RetTime (min) | Area (μV*s) | Area (%) | Height (μV) |
|---|---------------|-------------|----------|-------------|
| 1 | 0.642         | 1019249     | 49.78    | 1048568     |
| 2 | 0.685         | 1028296     | 50.22    | 1002483     |

Sample Name: 2p-sym

Wave Length: 202.6nm

Column: Trefoil™ CEL2 95:05

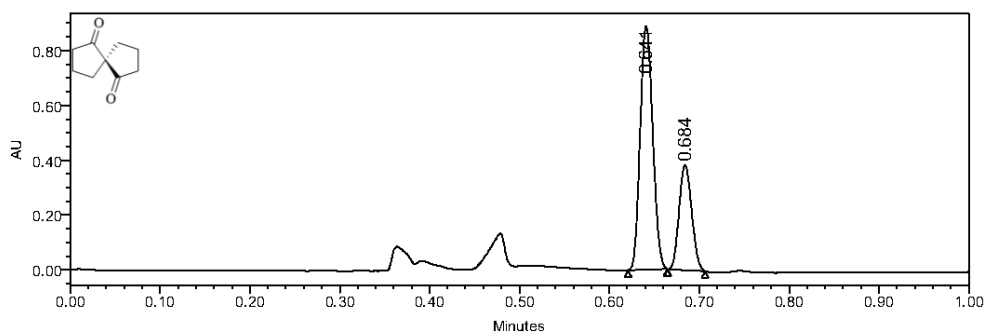

## peak information:

|   | RetTime (min) | Area (μV*s) | Area (%) | Height (μV) |
|---|---------------|-------------|----------|-------------|
| 1 | 0.641         | 861219      | 69.69    | 887100      |
| 2 | 0.684         | 374572      | 30.31    | 382697      |

Sample Name: 2q-rac  
Column: Trefoil™ CEL2 80:20

Wave Length: 251.0nm

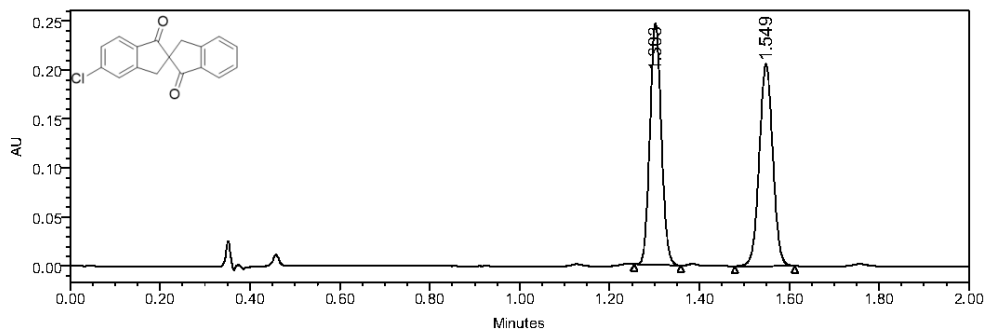

peak information:

|   | RetTime (min) | Area (μV*s) | Area (%) | Height (μV) |
|---|---------------|-------------|----------|-------------|
| 1 | 1.303         | 434377      | 50.26    | 246584      |
| 2 | 1.549         | 429862      | 49.74    | 205972      |

Sample Name: 2q-sym  
Column: Trefoil™ CEL2 80:20

Wave Length: 251.0nm

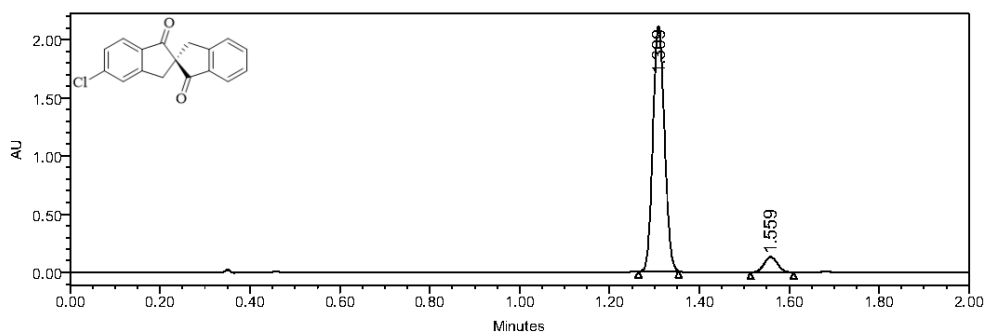

peak information:

|   | RetTime (min) | Area (μV*s) | Area (%) | Height (μV) |
|---|---------------|-------------|----------|-------------|
| 1 | 1.309         | 3746966     | 93.29    | 2106421     |
| 2 | 1.559         | 269576      | 6.71     | 130916      |

Sample Name: 2r-rac  
Column: Trefoil™ CEL2 80:20

Wave Length: 247.4nm

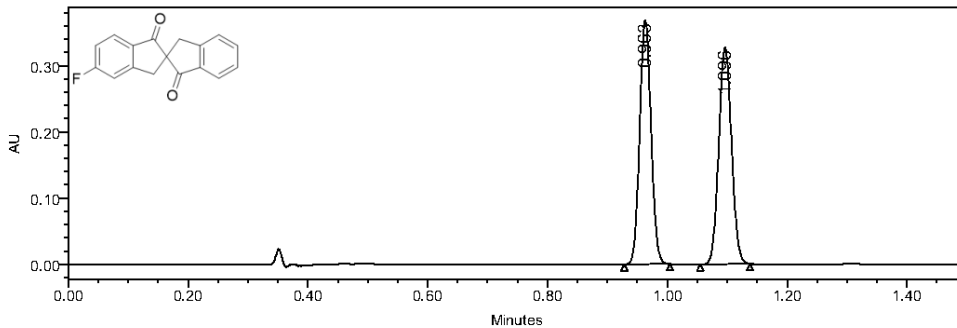

peak information:

|   | RetTime (min) | Area (μV*s) | Area (%) | Height (μV) |
|---|---------------|-------------|----------|-------------|
| 1 | 0.963         | 484892      | 50.02    | 368449      |
| 2 | 1.096         | 484499      | 49.98    | 327009      |

Sample Name: 2r-sym  
Column: Trefoil™ CEL2 80:20

Wave Length: 247.4nm

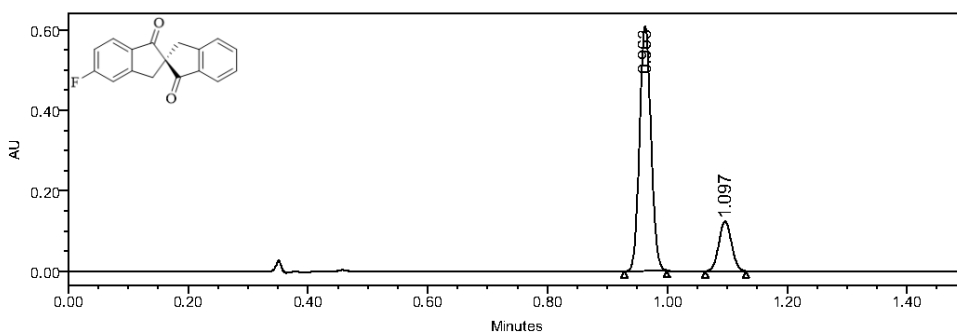

peak information:

|   | RetTime (min) | Area (μV*s) | Area (%) | Height (μV) |
|---|---------------|-------------|----------|-------------|
| 1 | 0.963         | 801901      | 81.50    | 608448      |
| 2 | 1.097         | 182014      | 18.50    | 123871      |

Sample Name: 2s-rac

Wave Length: 246.2nm

Column: Trefoil™ CEL2 80:20

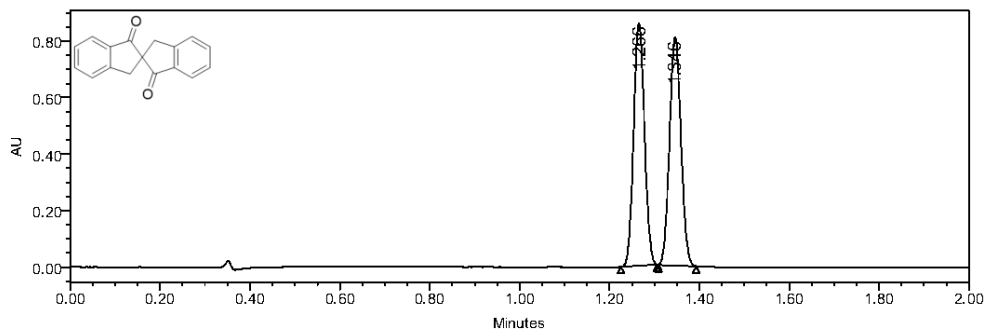

## peak information:

|   | RetTime (min) | Area (μV*s) | Area (%) | Height (μV) |
|---|---------------|-------------|----------|-------------|
| 1 | 1.266         | 1438063     | 50.09    | 858559      |
| 2 | 1.346         | 1432992     | 49.91    | 806892      |

Sample Name: 2s-sym

Wave Length: 246.2nm

Column: Trefoil™ CEL2 80:20

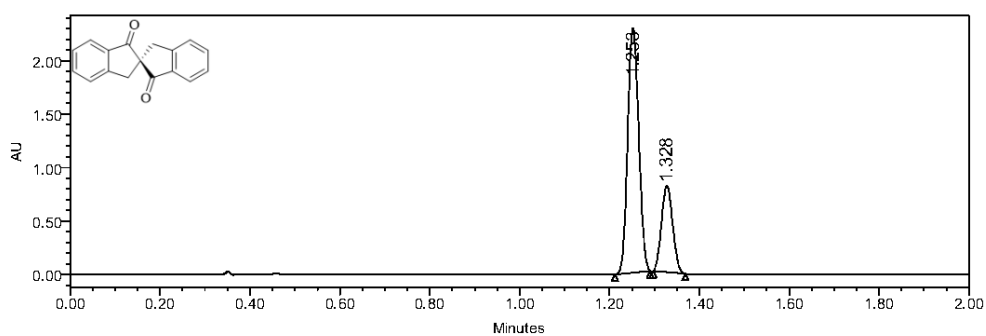

## peak information:

|   | RetTime (min) | Area (μV*s) | Area (%) | Height (μV) |
|---|---------------|-------------|----------|-------------|
| 1 | 1.253         | 3929783     | 73.72    | 2287995     |
| 2 | 1.328         | 1400636     | 26.28    | 810671      |

Sample Name: 2l-rac

Wave Length: 247.4nm

Column: CHIRALPAK® AD-3 80:20

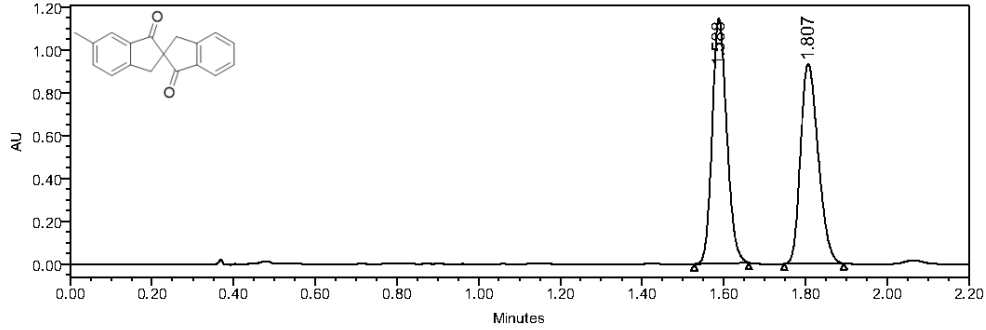

## peak information:

|   | RetTime (min) | Area (μV*s) | Area (%) | Height (μV) |
|---|---------------|-------------|----------|-------------|
| 1 | 1.588         | 2844228     | 50.37    | 1145368     |
| 2 | 1.807         | 2802083     | 49.63    | 931809      |

Sample Name: 2l-sym

Wave Length: 247.4nm

Column: CHIRALPAK® AD-3 80:20

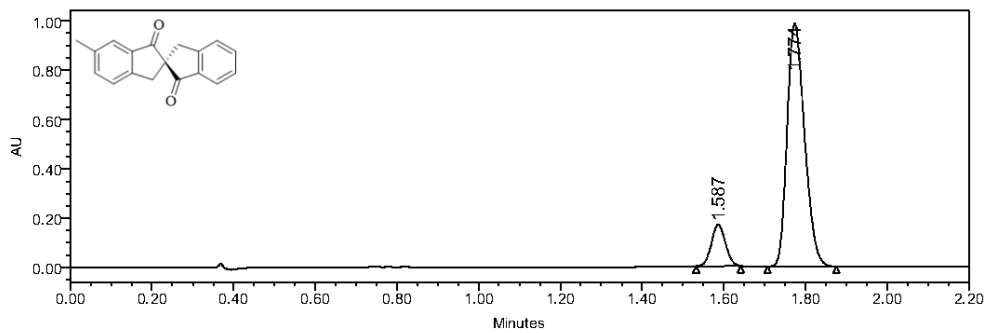

## peak information:

|   | RetTime (min) | Area (μV*s) | Area (%) | Height (μV) |
|---|---------------|-------------|----------|-------------|
| 1 | 1.587         | 404373      | 12.14    | 168840      |
| 2 | 1.774         | 2926961     | 87.86    | 986975      |

## 9. References

- (1) S.-K. Chen, W.-Q. Ma, Z.-B. Yan, F.-M. Zhang, S.-H. Wang, Y.-Q. Tu, X.-M. Zhang, J.-M. Tian, *J. Am. Chem. Soc.* 2018, **140**, 10099.
- (2) (a) K. Barral, A. D. Moorhouse, J. E. Moses, *Org. Lett.* 2007, **9**, 1809; (b) M. A. E. Pinto-Bazurco Mendieta, M. Negri, C. Jagusch, U. Müller-Vieira, T. Lauterbach, R. W. Hartmann, *J. Med. Chem.* 2008, **51**, 5009.
- (3) (a) J. A. Nieman, B. A. Keay, *Synth. Commun.* 1999, **29**, 3829; (b) X. Gu, Y. Zhang, Z.-J. Xu, C.-M. Che, *Chem. Commun.* 2014, **50**, 7870.
- (4) B. F. Rahemtulla, H. F. Clark, M. D. Smith, *Angew. Chem., Int. Ed.* 2016, **55**, 13180.
